# Supplementary material for: Effective self-assembly of 21- and 14-membered azamacrocycles via condition-controlled cyclotrimerization or cyclodimerization of different thiosemicarbazide-based precursors
Source: Royal Society of Chemistry journal article supplement (doi:10.1039/d4ob01384k), 2024-01-01
Supplement: d4ob01384k1.pdf [file d4ob01384k1.pdf]

## Supporting Information

### Effective self-assembly of 21- and 14-membered azamacrocycles via condition-controlled cyclotrimerization or cyclodimerization of different thiosemicarbazide-based precursors

Anastasia A. Fesenko,<sup>a</sup> Mikhail S. Grigoriev<sup>a</sup> and Anatoly D. Shutalev<sup>\*b</sup>

<sup>a</sup> *A. N. Frumkin Institute of Physical Chemistry and Electrochemistry, Russian Academy of Sciences, 31 Leninsky Ave., Bldg 4, 119071 Moscow, Russian Federation*

<sup>b</sup> *N. D. Zelinsky Institute of Organic Chemistry, Russian Academy of Sciences, 47 Leninsky Ave., 119991 Moscow, Russian Federation*

### Contents

|                                                                                                                                                                                  |        |
|----------------------------------------------------------------------------------------------------------------------------------------------------------------------------------|--------|
| 1. Synthesis of cyclic thiosemicarbazones <b>6</b> , <b>7</b> , and <b>8</b> (Table 1)                                                                                           | 2–3    |
| 2. Discussion of the stereoselectivity of the formation of macrocycle <b>7</b>                                                                                                   | 4–5    |
| 3. Copy of <sup>1</sup> H NMR spectrum of a 90:10 mixture of compounds <b>3</b> and <b>4</b>                                                                                     | 6      |
| 4. Copies of 1D and 2D NMR spectra of hydrazone <b>5</b>                                                                                                                         | 7–11   |
| 5. Copies of <sup>1</sup> H NMR spectra of crude products of cyclooligomerization of the <b>3+4</b> mixture and hydrazone <b>5</b> under various conditions (selected syntheses) | 12–23  |
| 6. Copies of 1D and 2D NMR spectra of 14-membered macrocycle <b>6</b>                                                                                                            | 24–29  |
| 7. Mass spectrum of 14-membered macrocycle <b>6</b> (electron impact, 70 eV)                                                                                                     | 30     |
| 8. Copies of 1D and 2D NMR spectra of 21-membered macrocycle <b>7</b>                                                                                                            | 31–51  |
| 9. Copies of IR spectra of compounds <b>5</b> , <b>6</b> , and <b>7</b>                                                                                                          | 52–55  |
| 10. X-ray diffraction data                                                                                                                                                       | 56–62  |
| 11. Computational details                                                                                                                                                        | 63–148 |
| 12. References and notes                                                                                                                                                         | 149    |

**Table 1** Synthesis of cyclic thiosemicarbazones **6**, **7**, and **8**<sup>a</sup>

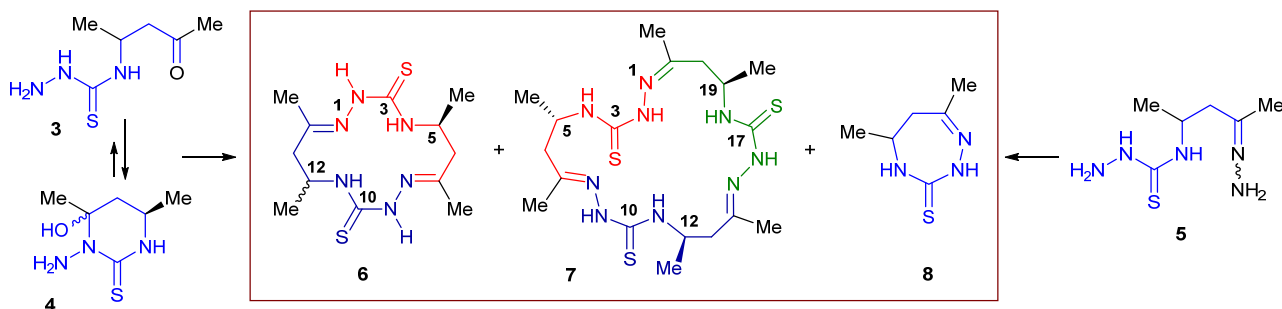

| Entry | Substrate <sup>b</sup> | Promotor (equiv)                                                                         | Solvent | Conc. of substrate, mmol/mL | Reaction conditions | Products distribution (%) <sup>c</sup> |          |          | Isolated yield <sup>d,e</sup> (%) |
|-------|------------------------|------------------------------------------------------------------------------------------|---------|-----------------------------|---------------------|----------------------------------------|----------|----------|-----------------------------------|
|       |                        |                                                                                          |         |                             |                     | <b>6</b><br>( <i>cis/trans</i> )       | <b>7</b> | <b>8</b> |                                   |
| 1     | <b>3 + 4</b>           | TsOH·H <sub>2</sub> O (0.09)                                                             | MeCN    | 0.22                        | reflux, 1.25 h      | 53<br>(73:27)                          | 26       | 21       | 77                                |
| 2     | <b>3 + 4</b>           | TsOH·H <sub>2</sub> O (0.10)                                                             | EtOH    | 0.24                        | reflux, 1.25 h      | 44<br>(72:28)                          | 46       | 10       | 79                                |
| 3     | <b>3 + 4</b>           | TsOH·H <sub>2</sub> O (0.30)                                                             | EtOH    | 0.21                        | reflux, 1.25 h      | 40<br>(74:26)                          | 60       | 0        | 76                                |
| 4     | <b>3 + 4</b>           | TsOH·H <sub>2</sub> O (0.10)                                                             | EtOH    | 0.066                       | reflux, 1.25 h      | 27<br>(64:36)                          | 14       | 59       | 74                                |
| 5     | <b>3 + 4</b>           | TsOH·H <sub>2</sub> O (0.10)                                                             | EtOH    | 0.21                        | rt, 1.25 h          | 12<br>(73:27)                          | 25       | 63       | <sub>f,g</sub>                    |
| 6     | <b>3 + 4</b>           | TsOH·H <sub>2</sub> O (0.10)                                                             | MeOH    | 0.21                        | reflux, 1.25 h      | 32<br>(73:27)                          | 57       | 11       | <sub>h,g</sub>                    |
| 7     | <b>3 + 4</b>           | AcOH (0.09)                                                                              | EtOH    | 0.20                        | reflux, 1.25 h      | 22<br>(53:47)                          | 12       | 66       | <sub>i,g</sub>                    |
| 8     | <b>3 + 4</b>           | NH <sub>2</sub> OH·HCl (1.24)                                                            | EtOH    | 0.25                        | reflux, 2 h         | 10<br>(73:27)                          | 88       | 2        | 84                                |
| 9     | <b>3 + 4</b>           | NH <sub>2</sub> OH·HCl (1.75)                                                            | EtOH    | 0.25                        | reflux, 2 h         | 7<br>(77:23)                           | 89       | 4        | 73                                |
| 10    | <b>3 + 4</b>           | NH <sub>2</sub> OH·HCl (1.26)                                                            | EtOH    | 1.00                        | reflux, 2 h         | 1<br>(76:24)                           | 96       | 3        | 74                                |
| 11    | <b>3 + 4</b>           | N <sub>2</sub> H <sub>4</sub> ·H <sub>2</sub> O (1.03) +<br>TsOH·H <sub>2</sub> O (1.15) | MeCN    | 0.50                        | reflux, 2 h         | 99<br>(83:17)                          | 1        | 0        | 84                                |
| 12    | <b>5</b>               | TsOH·H <sub>2</sub> O (1.10)                                                             | MeCN    | 0.51                        | reflux, 2 h         | 99<br>(80:20)                          | 1        | 0        | 91                                |
| 13    | <b>5</b>               | TsOH·H <sub>2</sub> O (1.10)                                                             | MeCN    | 0.25                        | reflux, 6 h         | 96<br>(81:19)                          | 4        | 0        | 84                                |
| 14    | <b>5</b>               | TsOH·H <sub>2</sub> O (1.11)                                                             | MeCN    | 0.50                        | reflux, 0.5 h       | 86<br>(75:25)                          | 14       | 0        | 83                                |
| 15    | <b>5</b>               | TsOH·H <sub>2</sub> O (1.11)                                                             | MeCN    | 0.50                        | reflux, 0.25 h      | 79<br>(70:30)                          | 21       | 0        | 85                                |
| 16    | <b>5</b>               | TsOH·H <sub>2</sub> O (1.11)                                                             | MeCN    | 0.46                        | rt, 24 h            | 48<br>(87:13)                          | 52       | 0        | 91                                |
| 17    | <b>5</b>               | TsOH·H <sub>2</sub> O (1.11)                                                             | EtOH    | 0.47                        | reflux, 2 h         | 30<br>(81:19)                          | 70       | 0        | 81                                |
| 18    | <b>5</b>               | TsOH·H <sub>2</sub> O (1.11)                                                             | EtOH    | 0.50                        | reflux, 0.5 h       | 30<br>(83:17)                          | 70       | 0        | 81                                |
| 19    | <b>5</b>               | TsOH·H <sub>2</sub> O (1.10)                                                             | EtOH    | 0.50                        | rt, 24 h            | 18<br>(88:12)                          | 81       | 1        | 87                                |
| 20    | <b>5</b>               | N <sub>2</sub> H <sub>4</sub> ·H <sub>2</sub> O (1.00) +<br>TsOH·H <sub>2</sub> O (2.11) | EtOH    | 0.42                        | rt, 24 h            | 8<br>(89:11)                           | 92       | 0        | 84                                |

|    |   |                                                                                          |      |      |             |               |     |   |    |
|----|---|------------------------------------------------------------------------------------------|------|------|-------------|---------------|-----|---|----|
| 21 | 5 | TsOH·H <sub>2</sub> O (1.11)                                                             | MeOH | 1.00 | reflux, 2 h | 3<br>(79:21)  | 97  | 0 | 83 |
| 22 | 5 | TsOH·H <sub>2</sub> O (1.11)                                                             | MeOH | 0.20 | reflux, 2 h | 71<br>(78:22) | 29  | 0 | 78 |
| 23 | 5 | N <sub>2</sub> H <sub>4</sub> ·H <sub>2</sub> O (1.00) +<br>TsOH·H <sub>2</sub> O (2.11) | MeOH | 1.00 | reflux, 2 h | 1<br>(74:26)  | 99  | 0 | 78 |
| 24 | 5 | N <sub>2</sub> H <sub>4</sub> ·H <sub>2</sub> O (1.00) +<br>TsOH·H <sub>2</sub> O (2.12) | MeOH | 0.20 | reflux, 2 h | 17<br>(80:20) | 83  | 0 | 80 |
| 25 | 5 | TsOH·H <sub>2</sub> O (1.10)                                                             | MeOH | 0.95 | rt, 24 h    | 18<br>(100:0) | 82  | 0 | 87 |
| 26 | 5 | N <sub>2</sub> H <sub>4</sub> ·H <sub>2</sub> O (1.01) +<br>TsOH·H <sub>2</sub> O (2.14) | MeOH | 1.02 | rt, 24 h    | 0             | 100 | 0 | 87 |
| 27 | 5 | N <sub>2</sub> H <sub>4</sub> ·H <sub>2</sub> O (1.01) +<br>TsOH·H <sub>2</sub> O (2.11) | MeOH | 0.57 | rt, 24 h    | 0             | 99  | 1 | 84 |
| 28 | 5 | N <sub>2</sub> H <sub>4</sub> ·H <sub>2</sub> O (1.00) +<br>TsOH·H <sub>2</sub> O (2.10) | MeOH | 0.41 | rt, 24 h    | 0             | 100 | 0 | 91 |
| 29 | 5 | N <sub>2</sub> H <sub>4</sub> ·H <sub>2</sub> O (1.01) +<br>TsOH·H <sub>2</sub> O (2.12) | MeOH | 0.33 | rt, 24 h    | 1<br>(84:16)  | 99  | 0 | 80 |
| 30 | 5 | NH <sub>2</sub> OH·HCl (1.01)<br>+ TsOH·H <sub>2</sub> O (1.12)                          | MeOH | 0.50 | rt, 24 h    | 3<br>(98:2)   | 90  | 7 | 73 |
| 31 | 5 | CH <sub>3</sub> NH <sub>2</sub> ·HCl (1.00)<br>+ TsOH·H <sub>2</sub> O (1.13)            | MeOH | 0.50 | rt, 24 h    | 9<br>(100:0)  | 90  | 1 | 77 |

<sup>a</sup> In all cases, the conversion of the starting material was complete, with the exception of entry 7, where the conversion was 98%. After completion of the reaction, solvent was removed under reduced pressure, solid residue was triturated with a saturated aqueous NaHCO<sub>3</sub> (entries 1-7, 11-31) or with water (entry 8-10), suspension was cooled to 0°C, precipitate was filtered, washed with cold water, and dried. <sup>b</sup> Substrate **5** was the 85:15 mixture of (*E*)- and (*Z*)-isomers, substrate **3** + **4** was the 90:10 mixture of pyrimidine **4** (two diastereomers, 75:25) and thiosemicarbazide **3**. Substrate **5** or **3** + **4** loading was 0.099–0.269 g, with the exception of entry 13 (0.489 g) and entry 26 (1.395 g). <sup>c</sup> According to <sup>1</sup>H NMR spectroscopic data for the crude products. <sup>d</sup> Total yield of the heterocyclization product(s). <sup>e</sup> Reactions in EtOH or MeOH gave products containing a significant amount (up to 49 mol%) of the corresponding alcohol (very strong solvates). In these cases, the product yields shown in the table were corrected based on <sup>1</sup>H NMR analysis of the crude products. <sup>f</sup> Significant amount of unidentified by-products was also formed; <sup>1</sup>H NMR estimated purity of heterocycles was about 27%. <sup>g</sup> Purity was estimated using <sup>1</sup>H NMR spectra of the crude products comparing the expected and observed integral intensities of proton signals at intervals of 9.6–10.6 ppm (NH–N proton) and 7.5–8.6 ppm (NH–CH proton). <sup>h</sup> Some amount of unidentified by-products was also formed; <sup>1</sup>H NMR estimated purity of heterocycles was about 80%. <sup>i</sup> Significant amount of unidentified by-products was also formed; <sup>1</sup>H NMR estimated purity of heterocycles was about 42%.

## Discussion of the stereoselectivity of the formation of macrocycle **7**

As an example, Scheme 1 demonstrates plausible pathways for the stereoselective formation of (1*Z*,5*R*,7*E*,12*S*,14*E*,19*S*)- and (1*Z*,5*S*,7*E*,12*R*,14*E*,19*R*)-enantiomers of macrocycle **7** by the reaction of (*S*,*E*,*R*)- and (*R*,*E*,*R*)-diastereomers of the dimers **9** or **11** with enantiomers of the corresponding monomers **5** and **3** in the presence of a promotor. Clearly, each the reaction can proceed with the participation of the thiosemicarbazide NH<sub>2</sub> group of both the reactants to give two possible trimers with (*Z*)-configuration or, preferably, with (*E*)-configuration of the new C=N bond. Thus, the reaction of the (*S*,*E*,*R*)-dimers **9** or **11** with the corresponding (*S*)-monomers **5** and **3** gives the trimers **A** or/and **B**. For simplicity, only (*E*)-configuration of the new C=N bond is shown. Next, trimer **A** cyclizes with the formation of the C=N bond with (*Z*)-configuration to afford (1*Z*,5*R*,7*E*,12*S*,14*E*,19*S*)-**7**. The latter is also obtained from trimer **B** through its preliminary *E*-to-*Z* isomerization to trimer **E**. Similarly, the reaction of the (*S*,*E*,*R*)-dimers **9** or **11** with the corresponding (*R*)-monomers **5** and **3** gives the trimers **C** or/and **D**, which after *E*-to-*Z* isomerization to the corresponding trimers **F** and **G** followed by cyclization transform into (1*Z*,5*S*,7*E*,12*R*,14*E*,19*R*)-enantiomer of macrocycle **7**. The latter is also formed by the reaction of the (*R*,*E*,*R*)-dimers **9** or **11** with the corresponding (*S*)-monomers **5** and **3** through the intermediate trimers **H**, **I**, and **J** as shown in Scheme 10. Clearly, the reaction of the (*R*,*E*,*R*)-dimers **9** or **11** with the corresponding (*R*)-monomers **5** and **3**, which is not presented in Scheme 10, cannot lead in a simple way to the target stereoisomer of macrocycle **7**. Apparently, this reaction does not occur due to its very low rate.

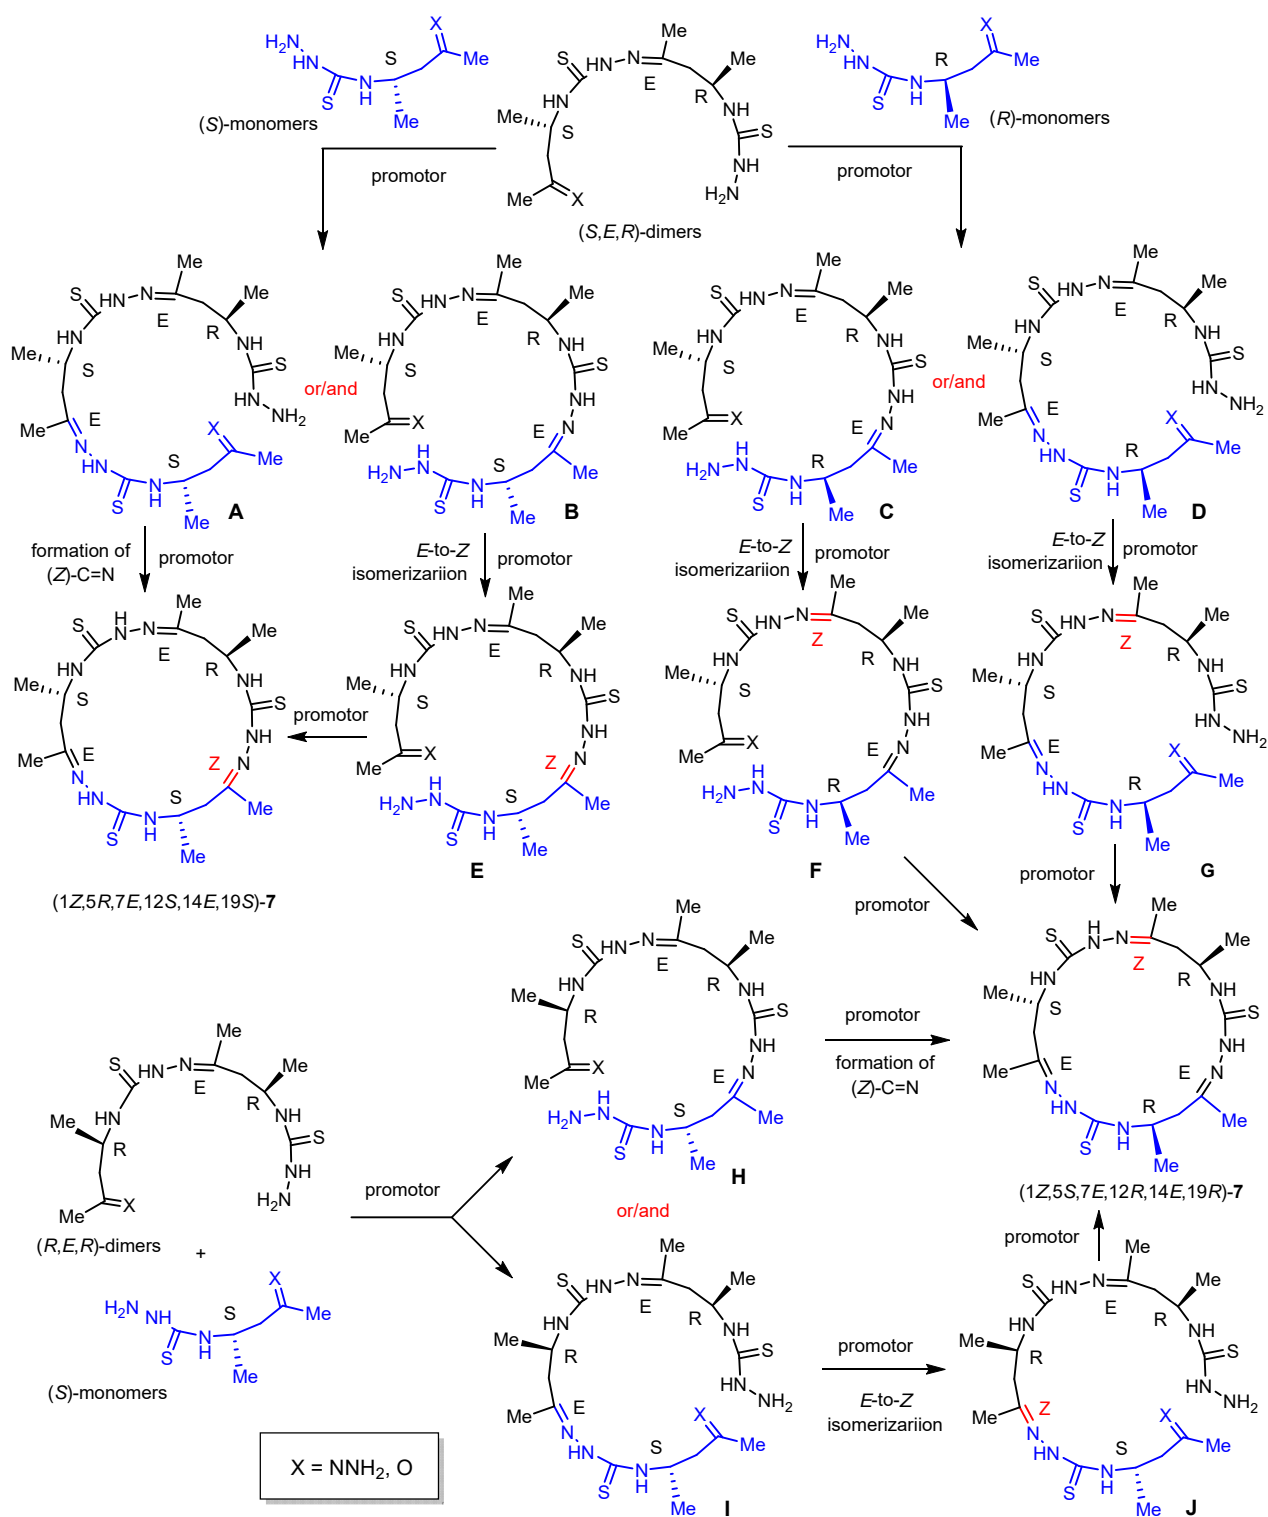

**Scheme 1** Plausible pathways for the stereoselective formation of (1Z,5R\*,7E,12S\*,14E,19S\*)-7 via the reaction of dimers **9** or **11** with the corresponding monomers **5** and **3** in the presence of promotor.

<sup>1</sup>H NMR spectrum of a 90:10 mixture of pyrimidine **4** (two diastereomers, 75:25) and its acyclic isomer, thiosemicarbazide **3** (300.13 MHz, DMSO-*d*<sub>6</sub>)

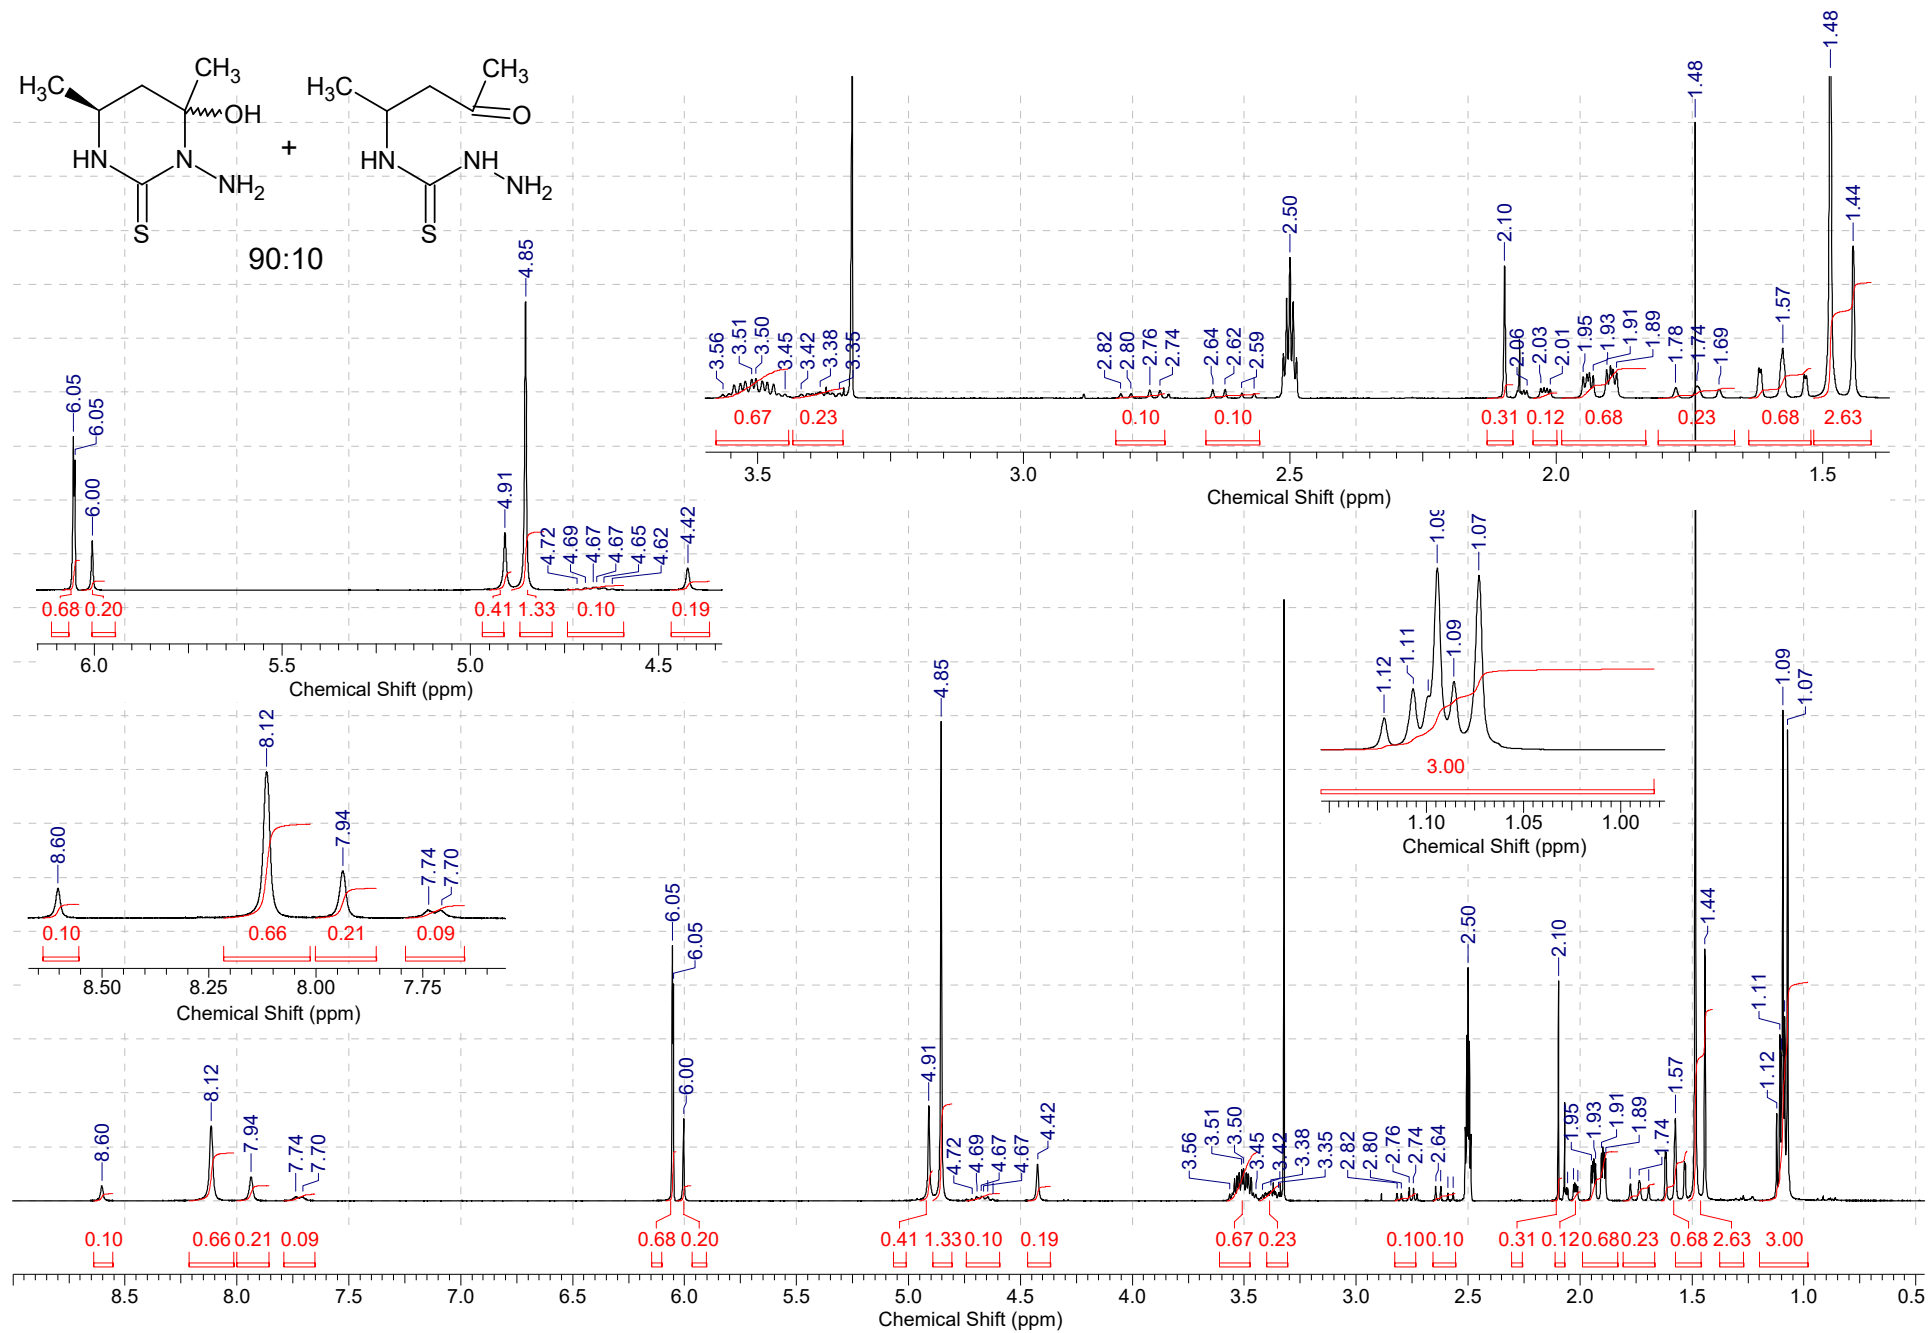

<sup>1</sup>H NMR spectrum of crude hydrazone **5** (mixture of *E*- and *Z*-isomers in a ratio of 85:15) (600.13 MHz, DMSO-*d*<sub>6</sub>)

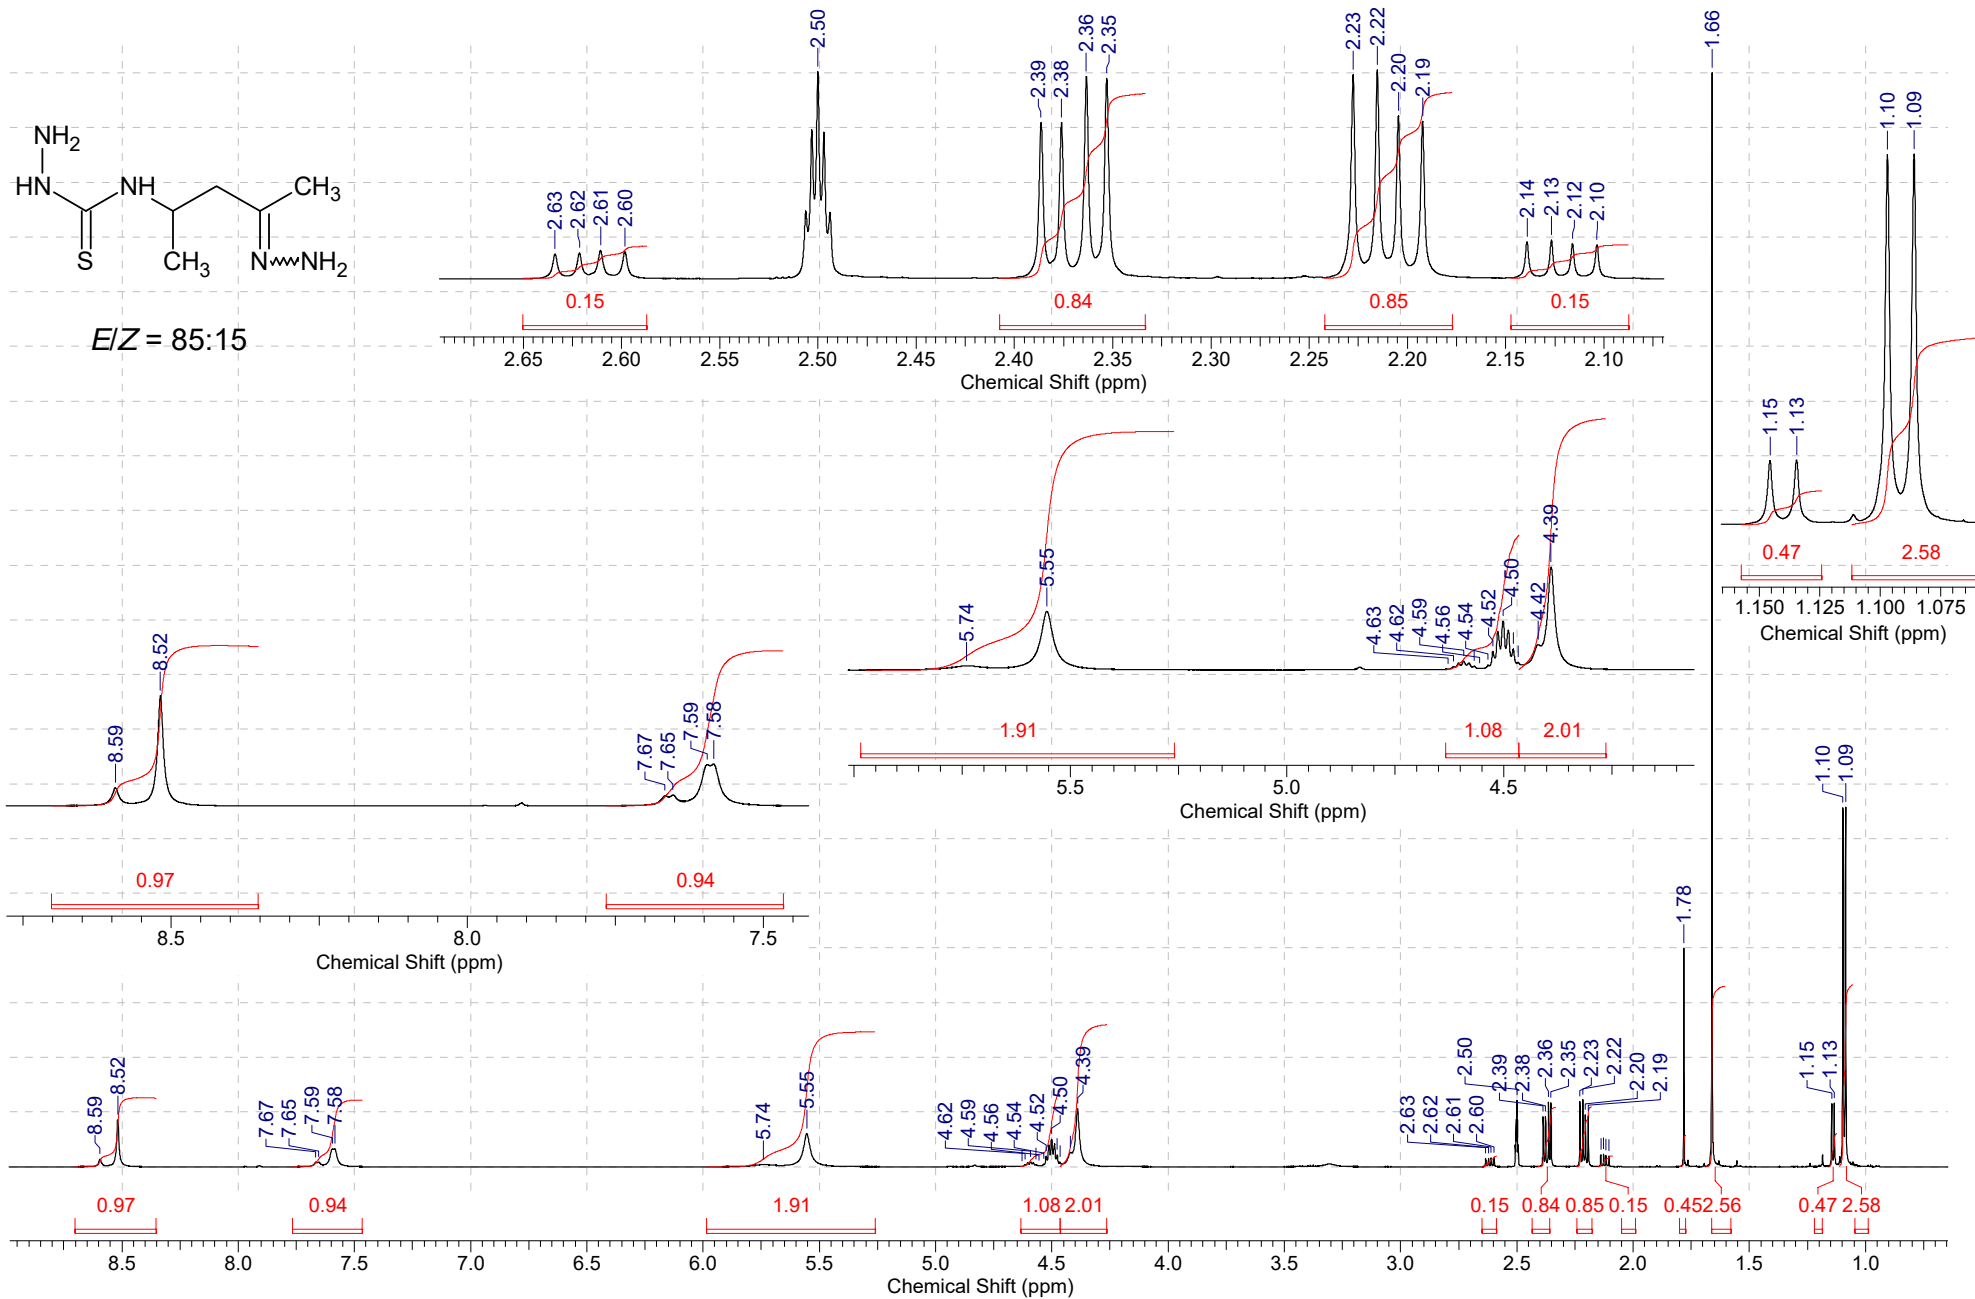

<sup>13</sup>C NMR spectrum of crude hydrazone **5** (mixture of *E*- and *Z*-isomers in a ratio of 85:15) (150.90 MHz, DMSO-*d*<sub>6</sub>)

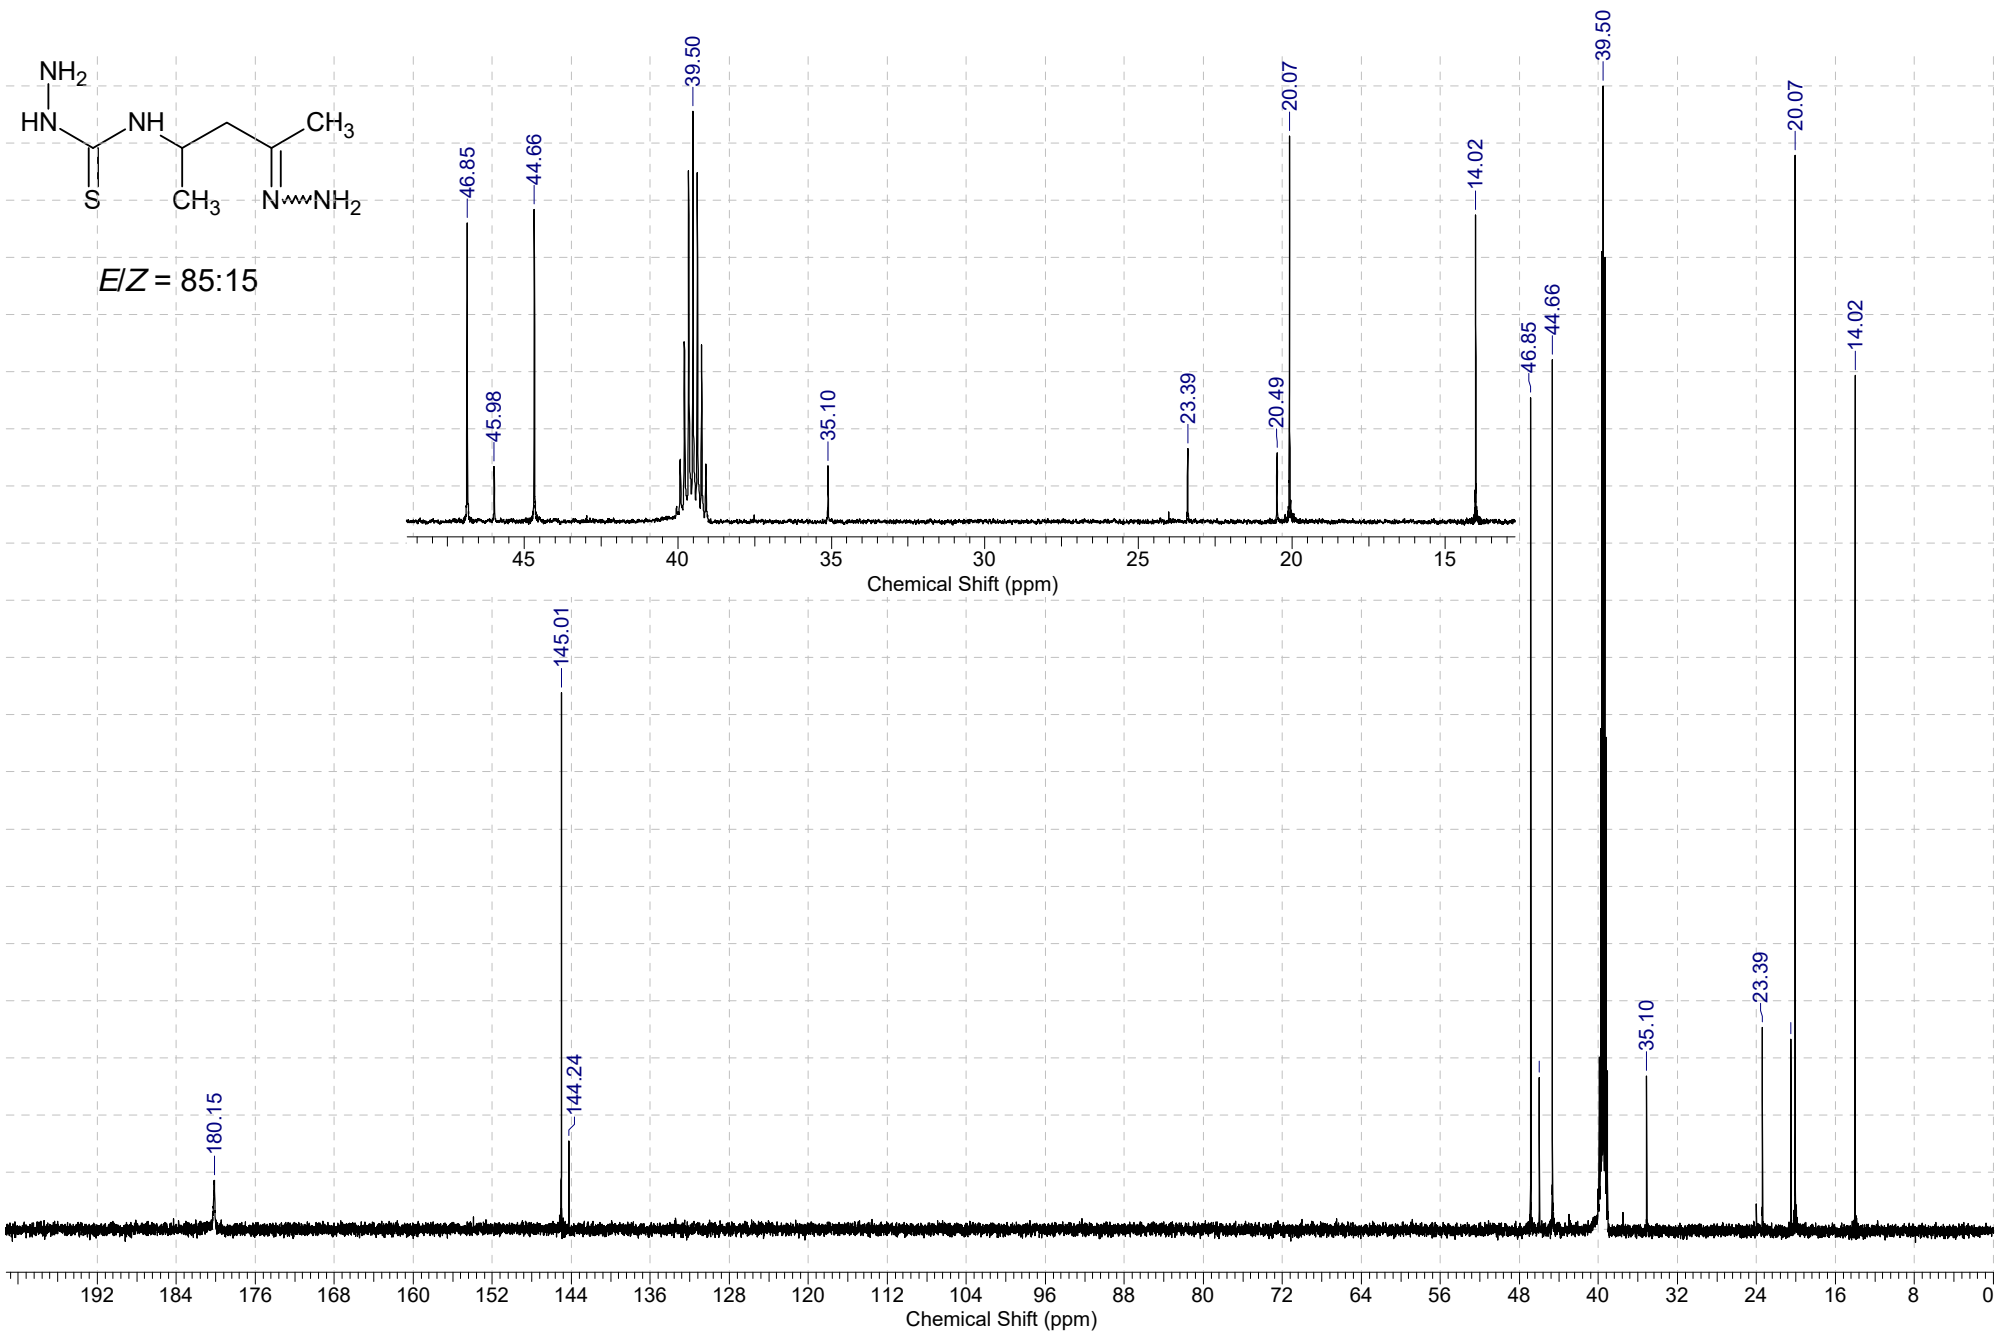



$^1\text{H}$ ,  $^{13}\text{C}$  HSQC spectrum of crude hydrazone **5** (mixture of *E*- and *Z*-isomers in a ratio of 85:15) (Bruker Avance III, DMSO- $d_6$ )

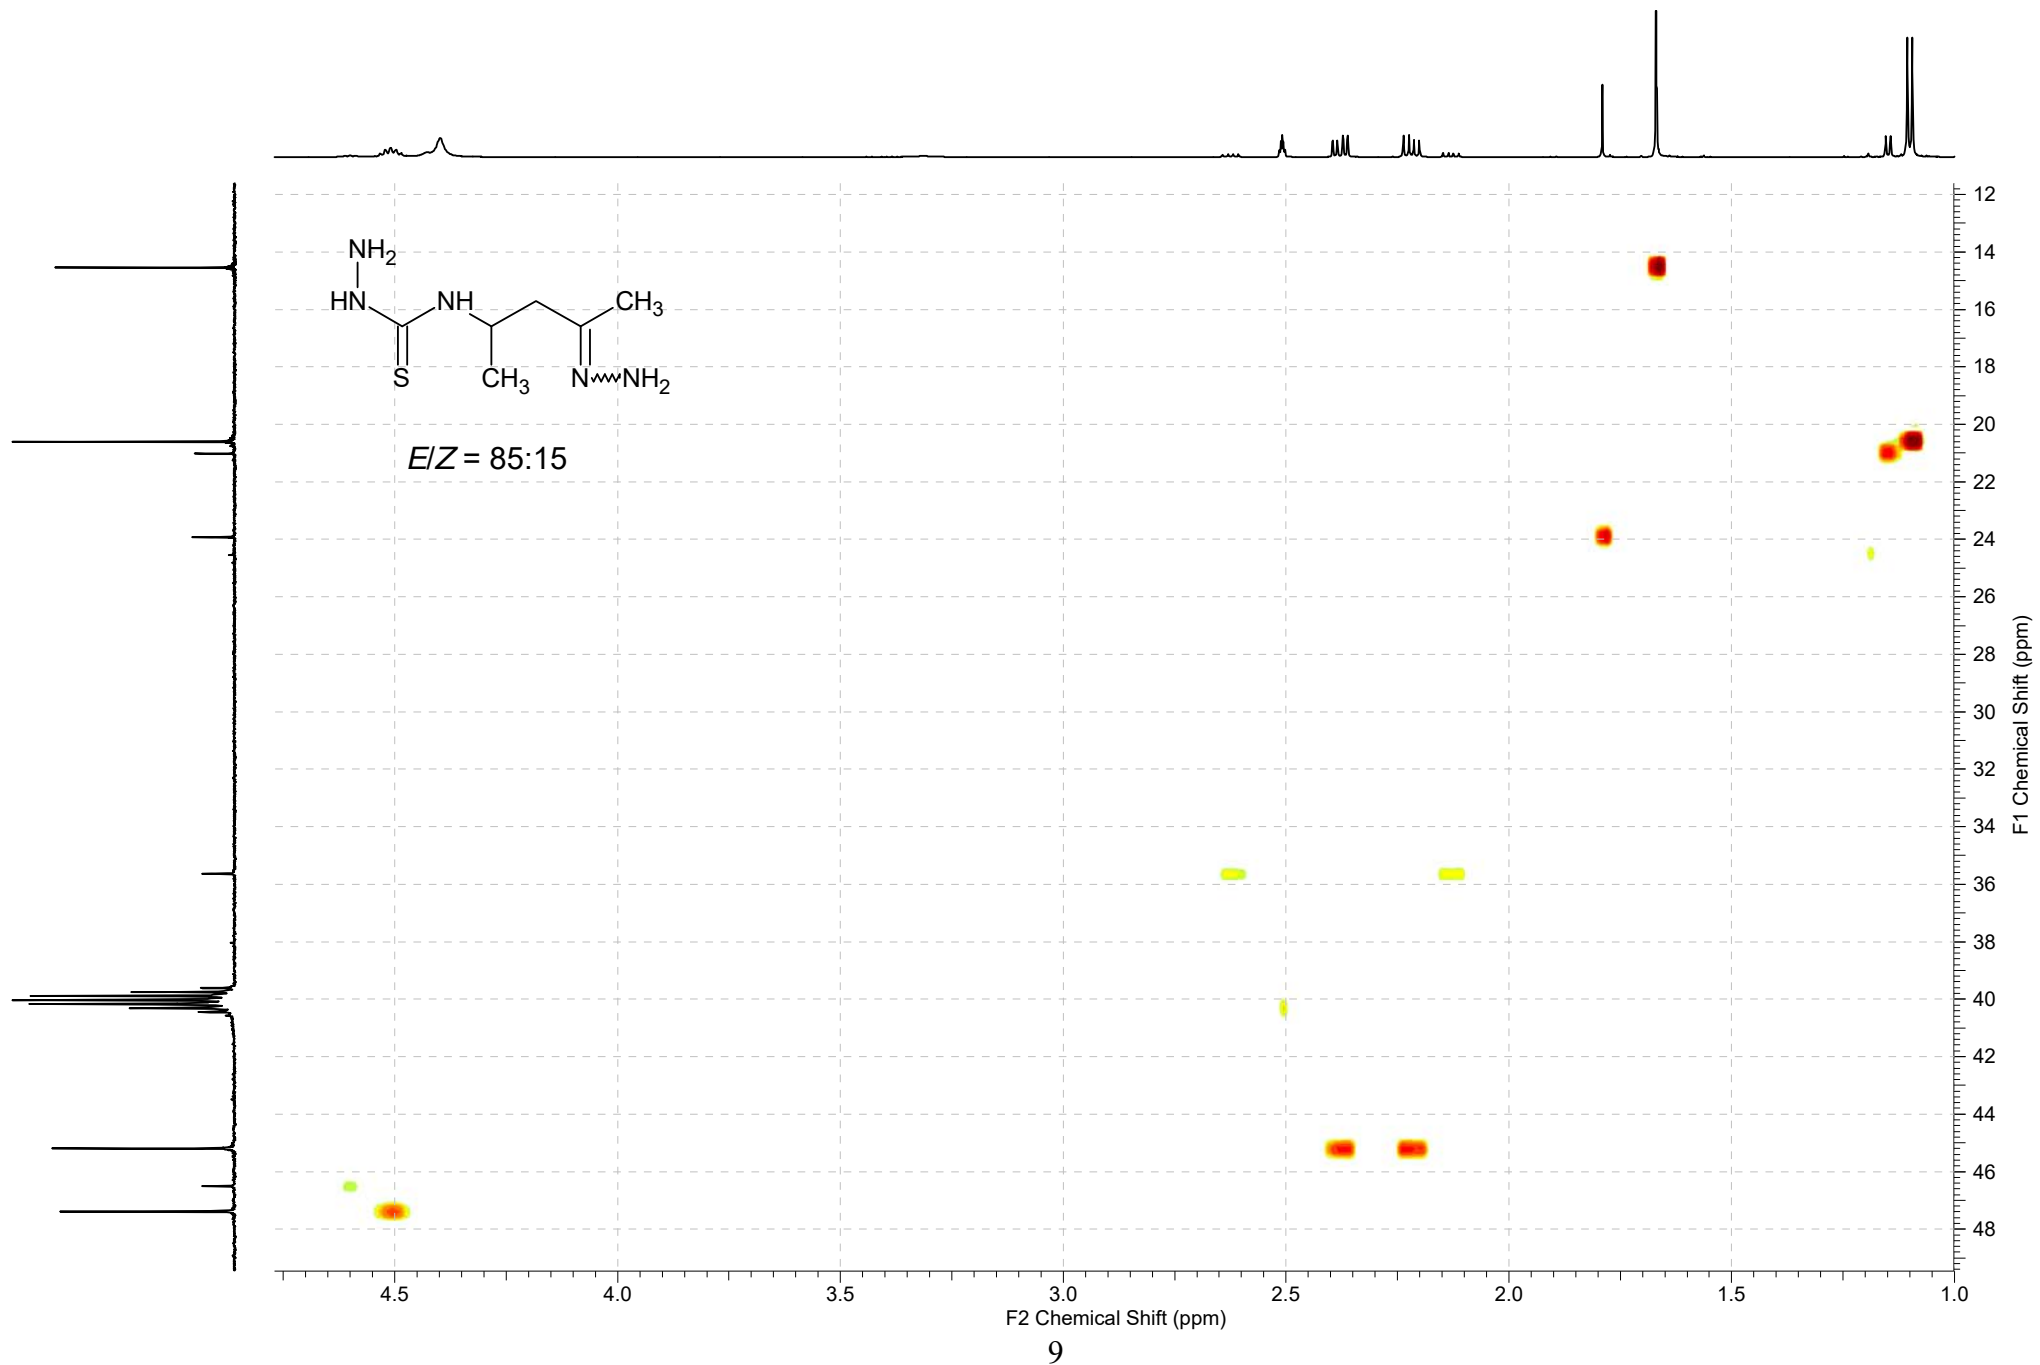

$^1\text{H}, ^1\text{H}$  NOESY spectrum of crude hydrazone **5** (mixture of *E*- and *Z*-isomers in a ratio of 85:15) (600.13 MHz,  $\text{DMSO-}d_6$ )

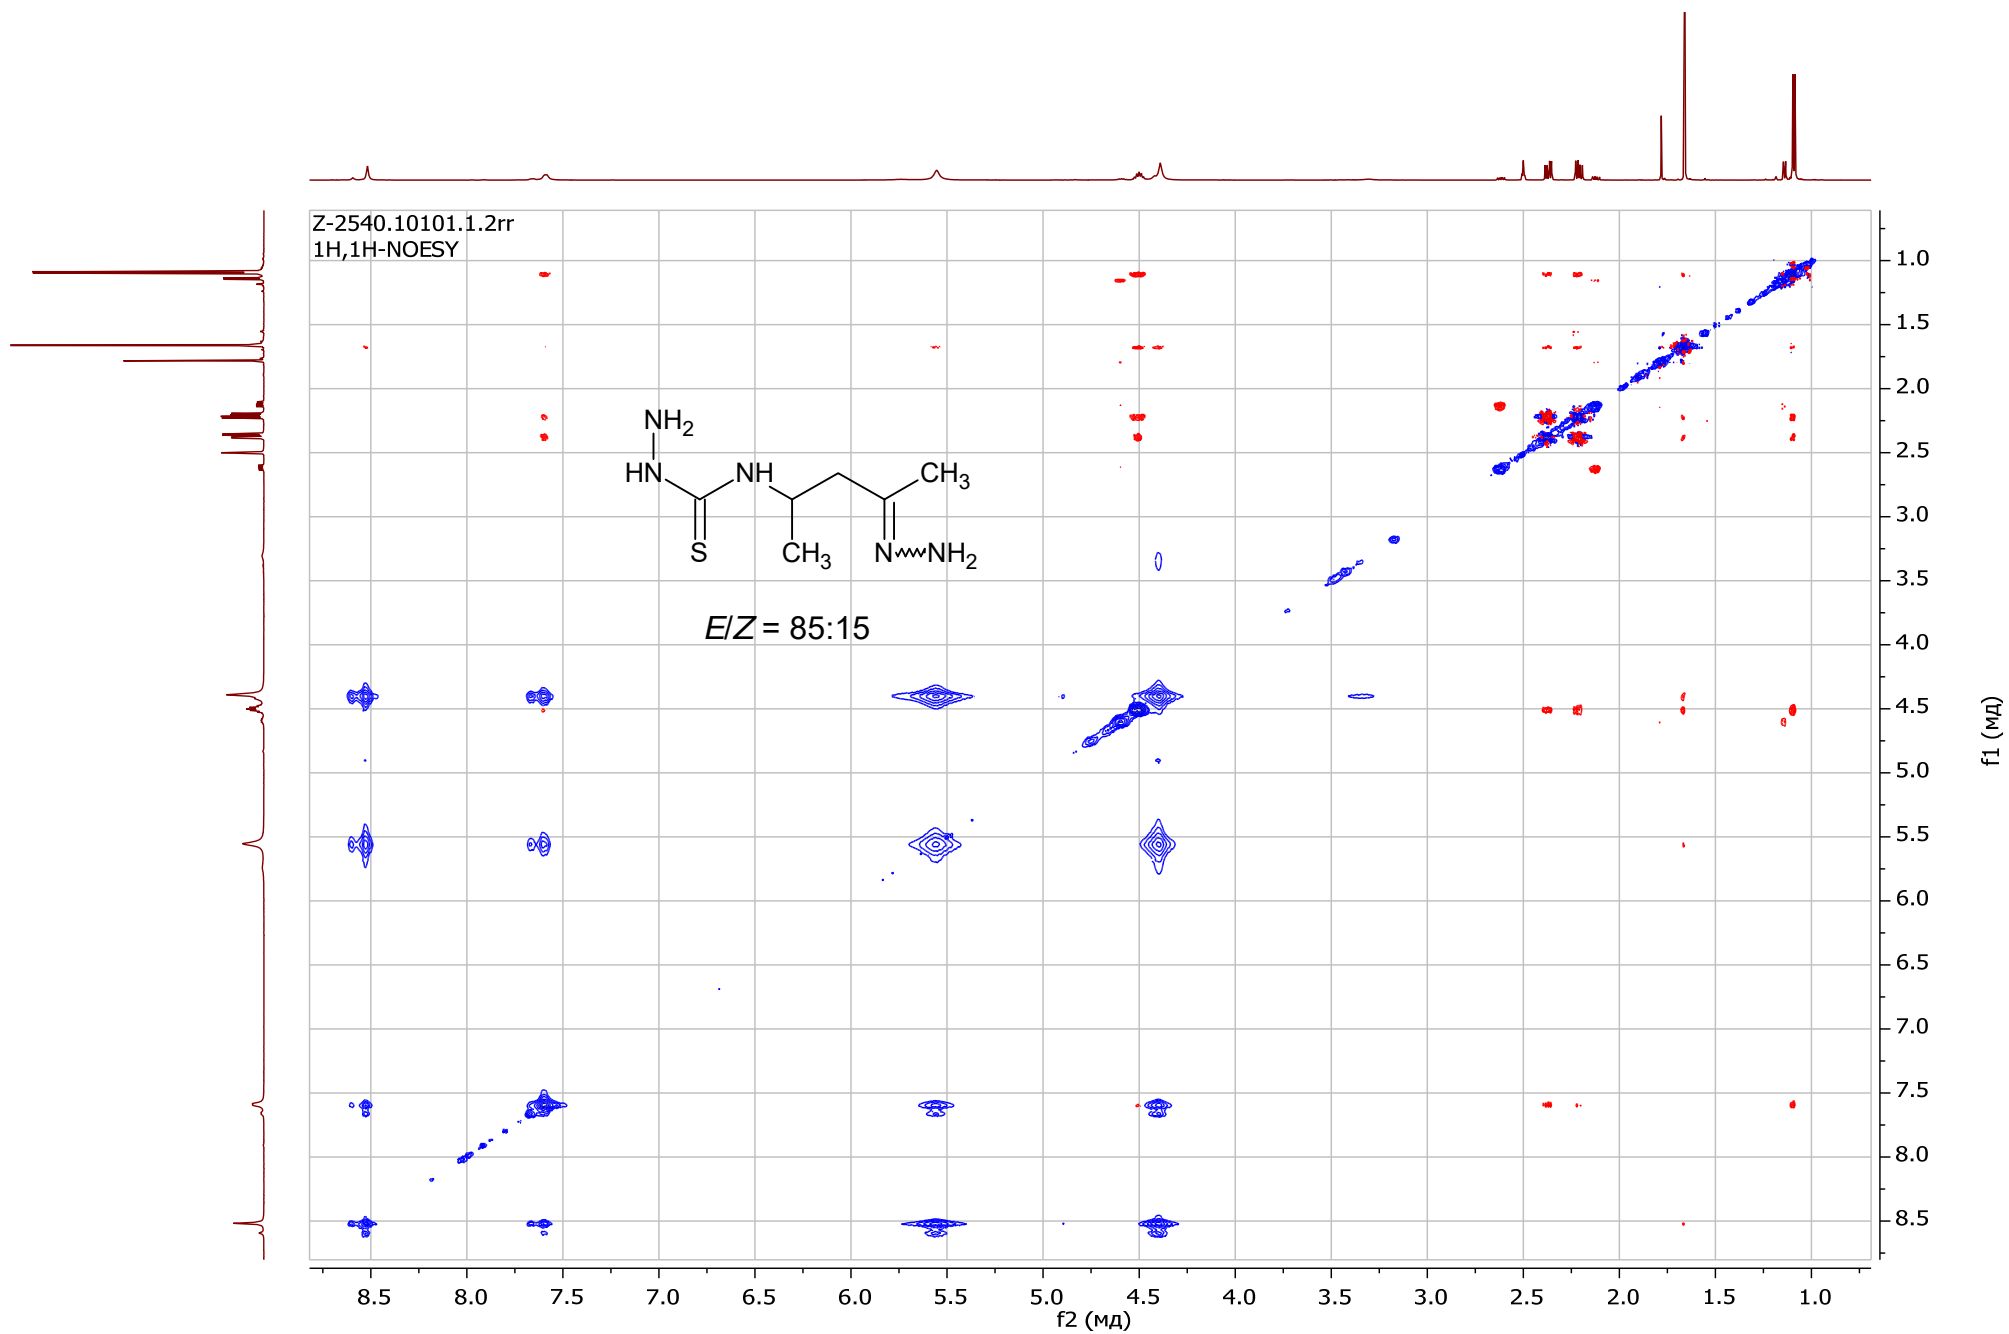

Fragment of  $^1\text{H}, ^1\text{H}$  NOESY spectrum of crude hydrazone **5** (mixture of *E*- and *Z*-isomers in a ratio of 85:15) (600.13 MHz,  $\text{DMSO-}d_6$ )

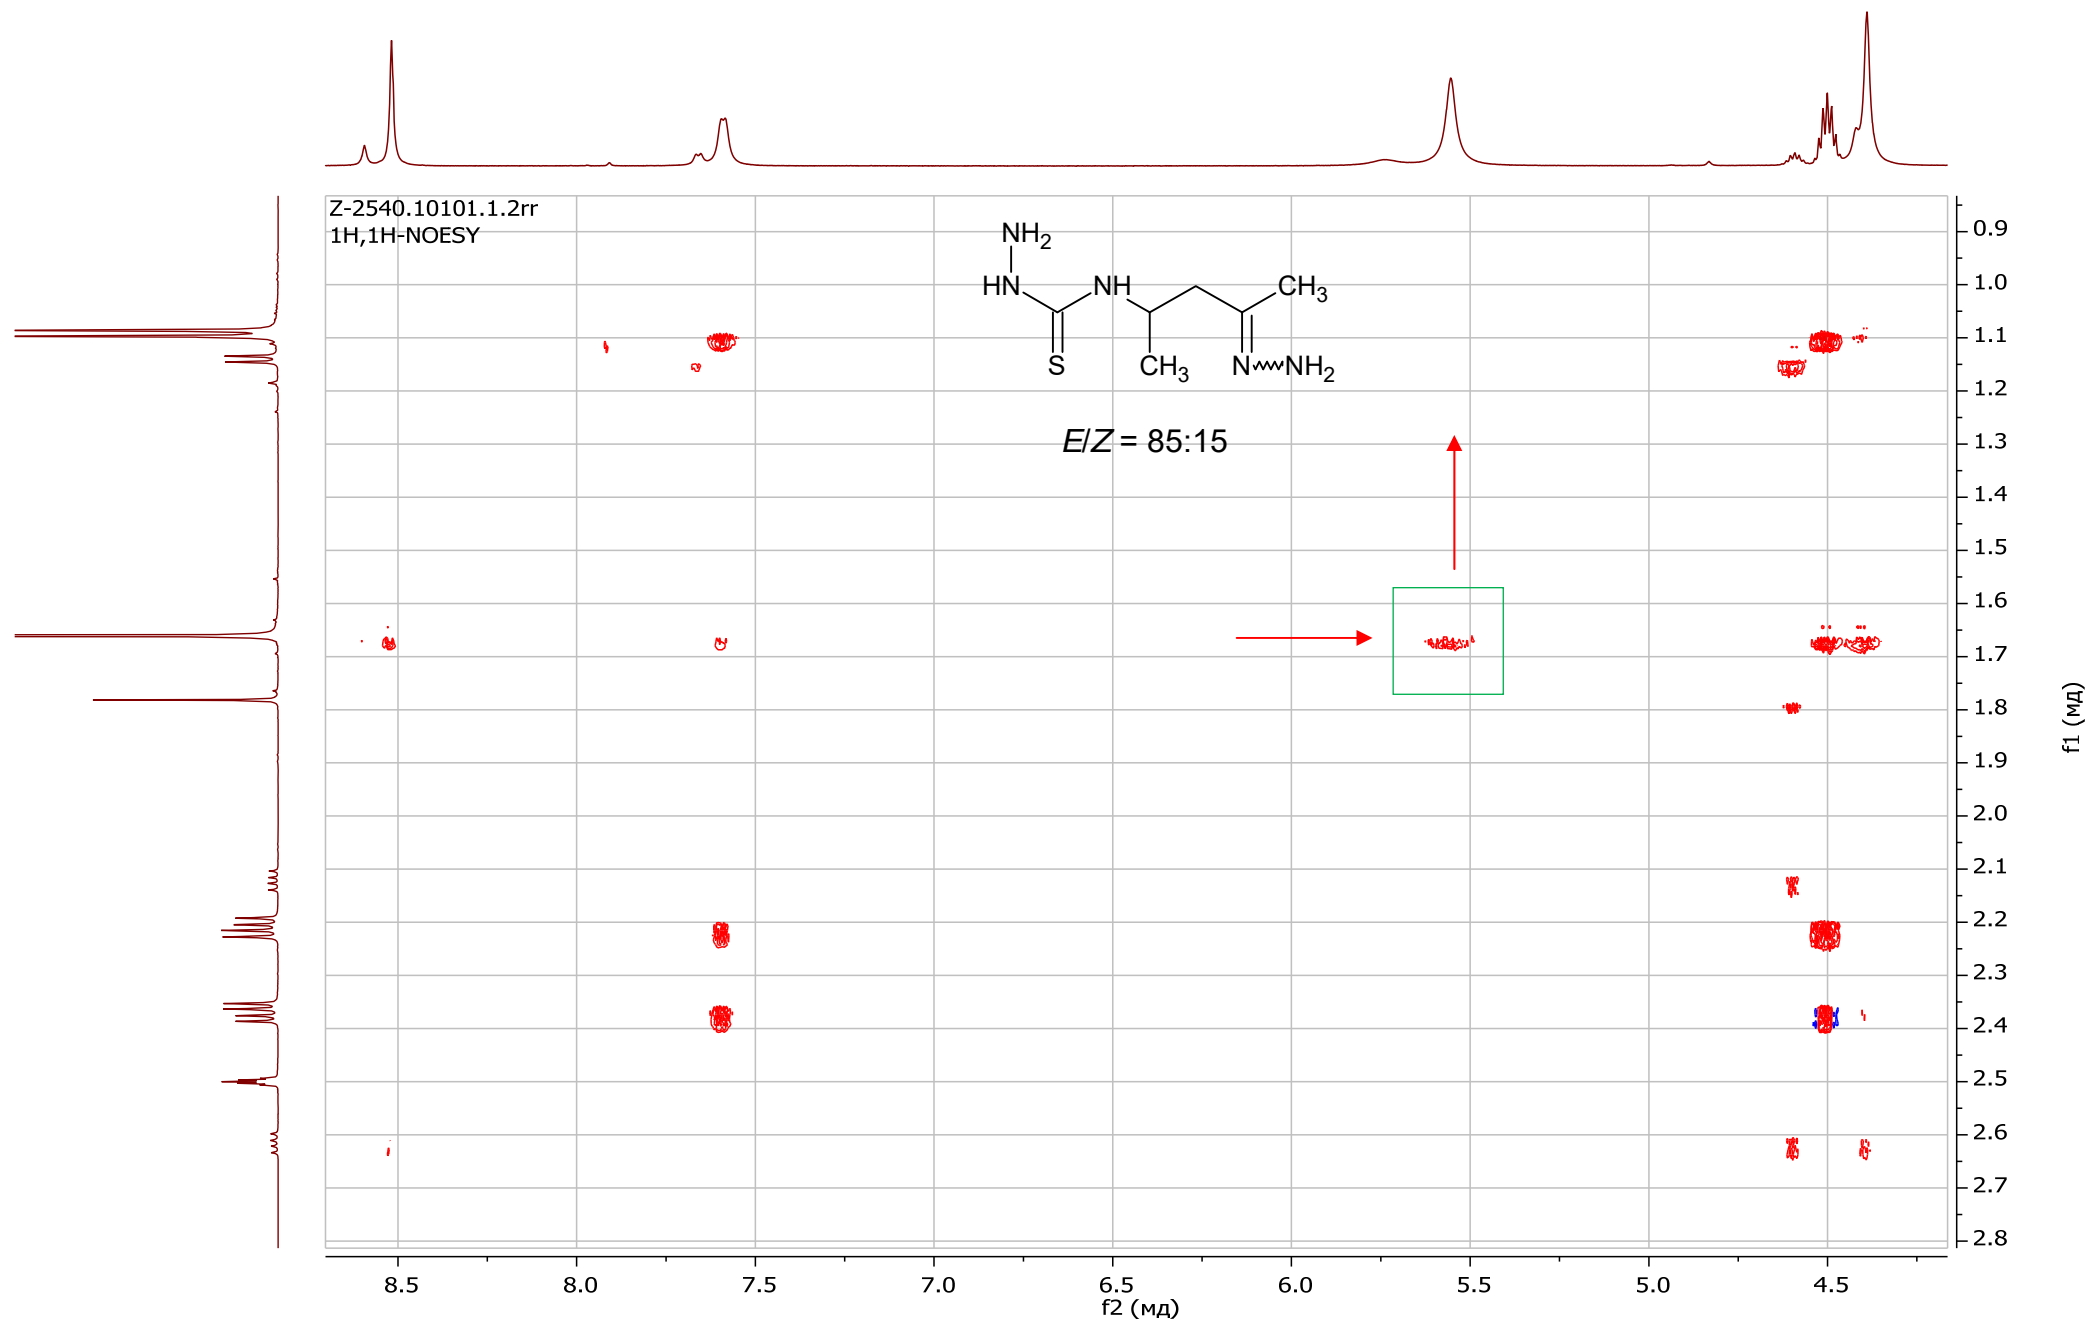

$^1\text{H}$  NMR spectrum of the crude product formed by the acid-catalyzed cyclization of the **3+4** mixture (Table 1, entry 2) (300.13 MHz,  $\text{DMSO-}d_6$ )

**Conditions:**

**3 + 4**, TsOH (0.10 equiv), EtOH, reflux, 1 h 15 min

**Products:**

**6 + 7 + 8** (44:46:10), 79% yield (Table 1, entry 2)

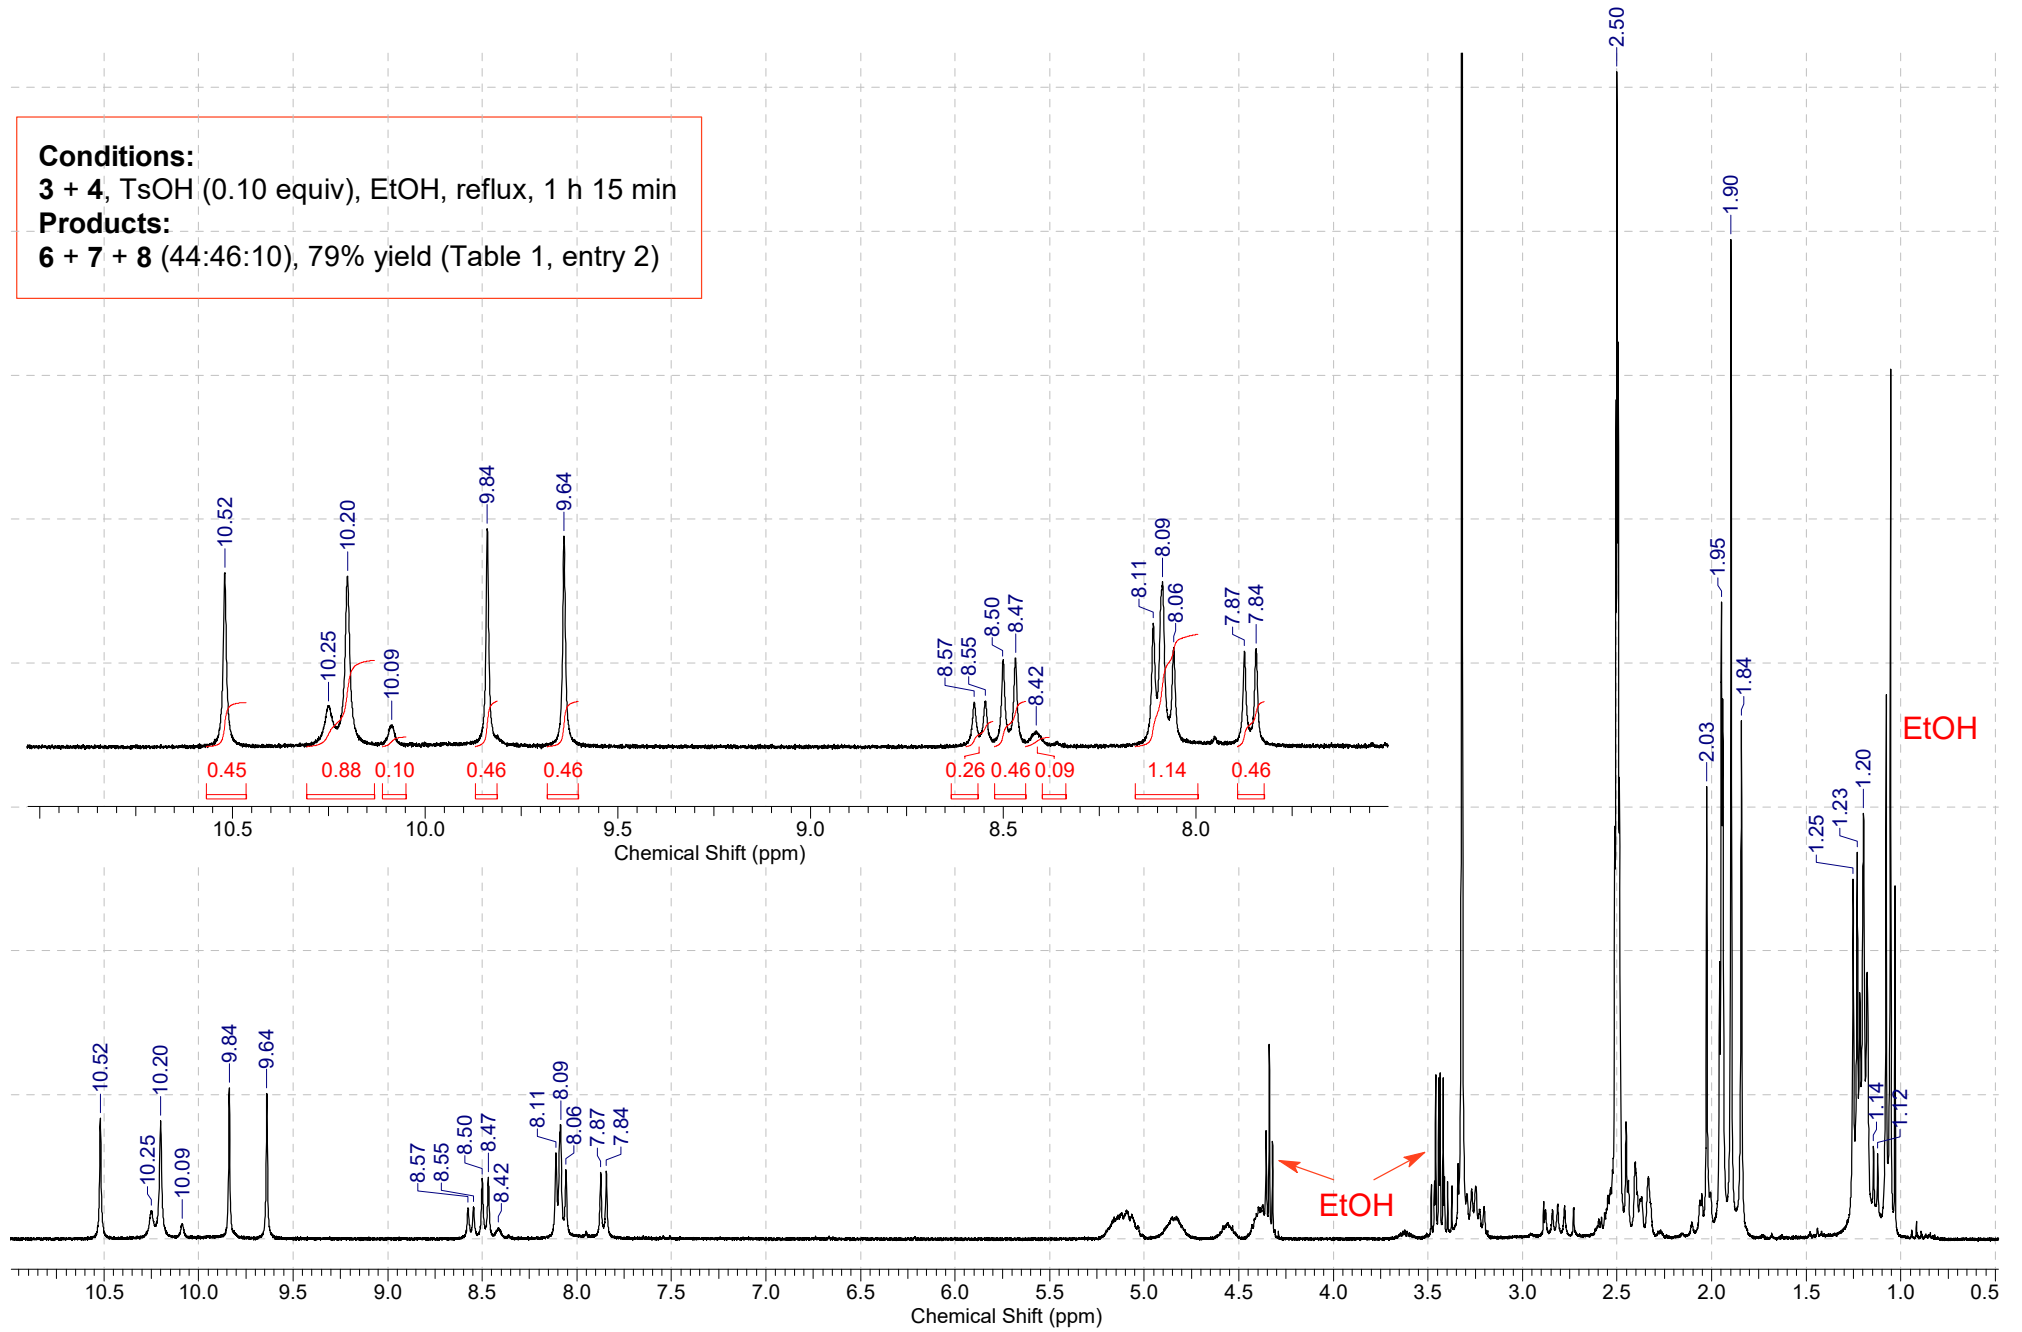

<sup>1</sup>H NMR spectrum of the crude product formed by the acid-catalyzed cyclization of the **3+4** mixture (Table 1, entry 3) (300.13 MHz, DMSO-*d*<sub>6</sub>)

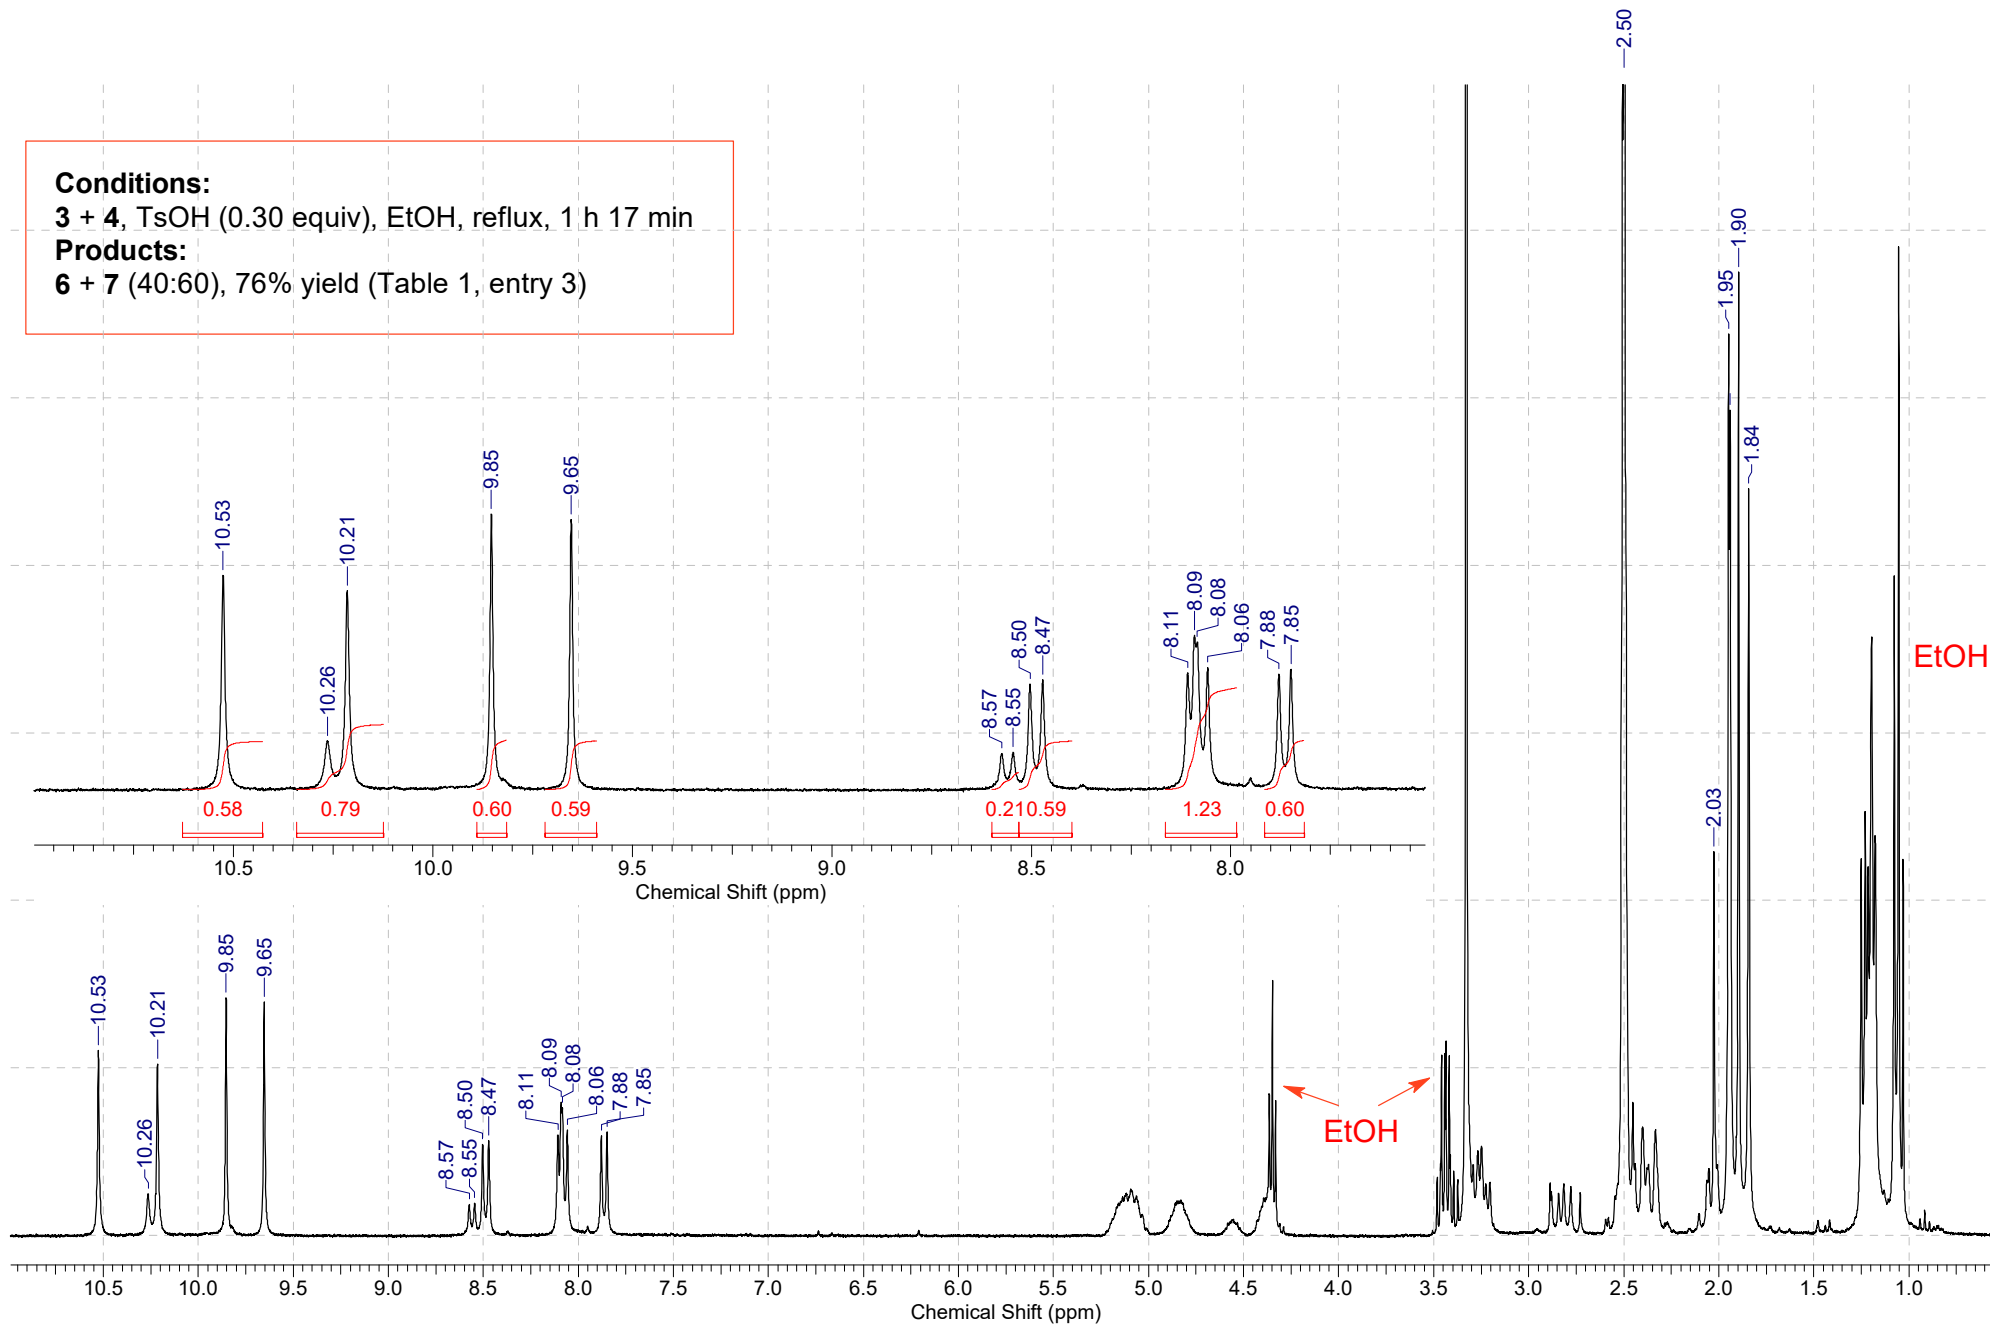

$^1\text{H}$  NMR spectrum of the crude product formed by the acid-catalyzed cyclization of the **3+4** mixture (Table 1, entry 4) (300.13 MHz,  $\text{DMSO-}d_6$ )

**Conditions:**

**3 + 4** (conc. 0.066 mmol/mL), TsOH (0.10 equiv), EtOH, reflux, 1 h 15 min

**Products:**

**6 + 7 + 8** (27:14:59), 74% yield (Table 1, entry 4)

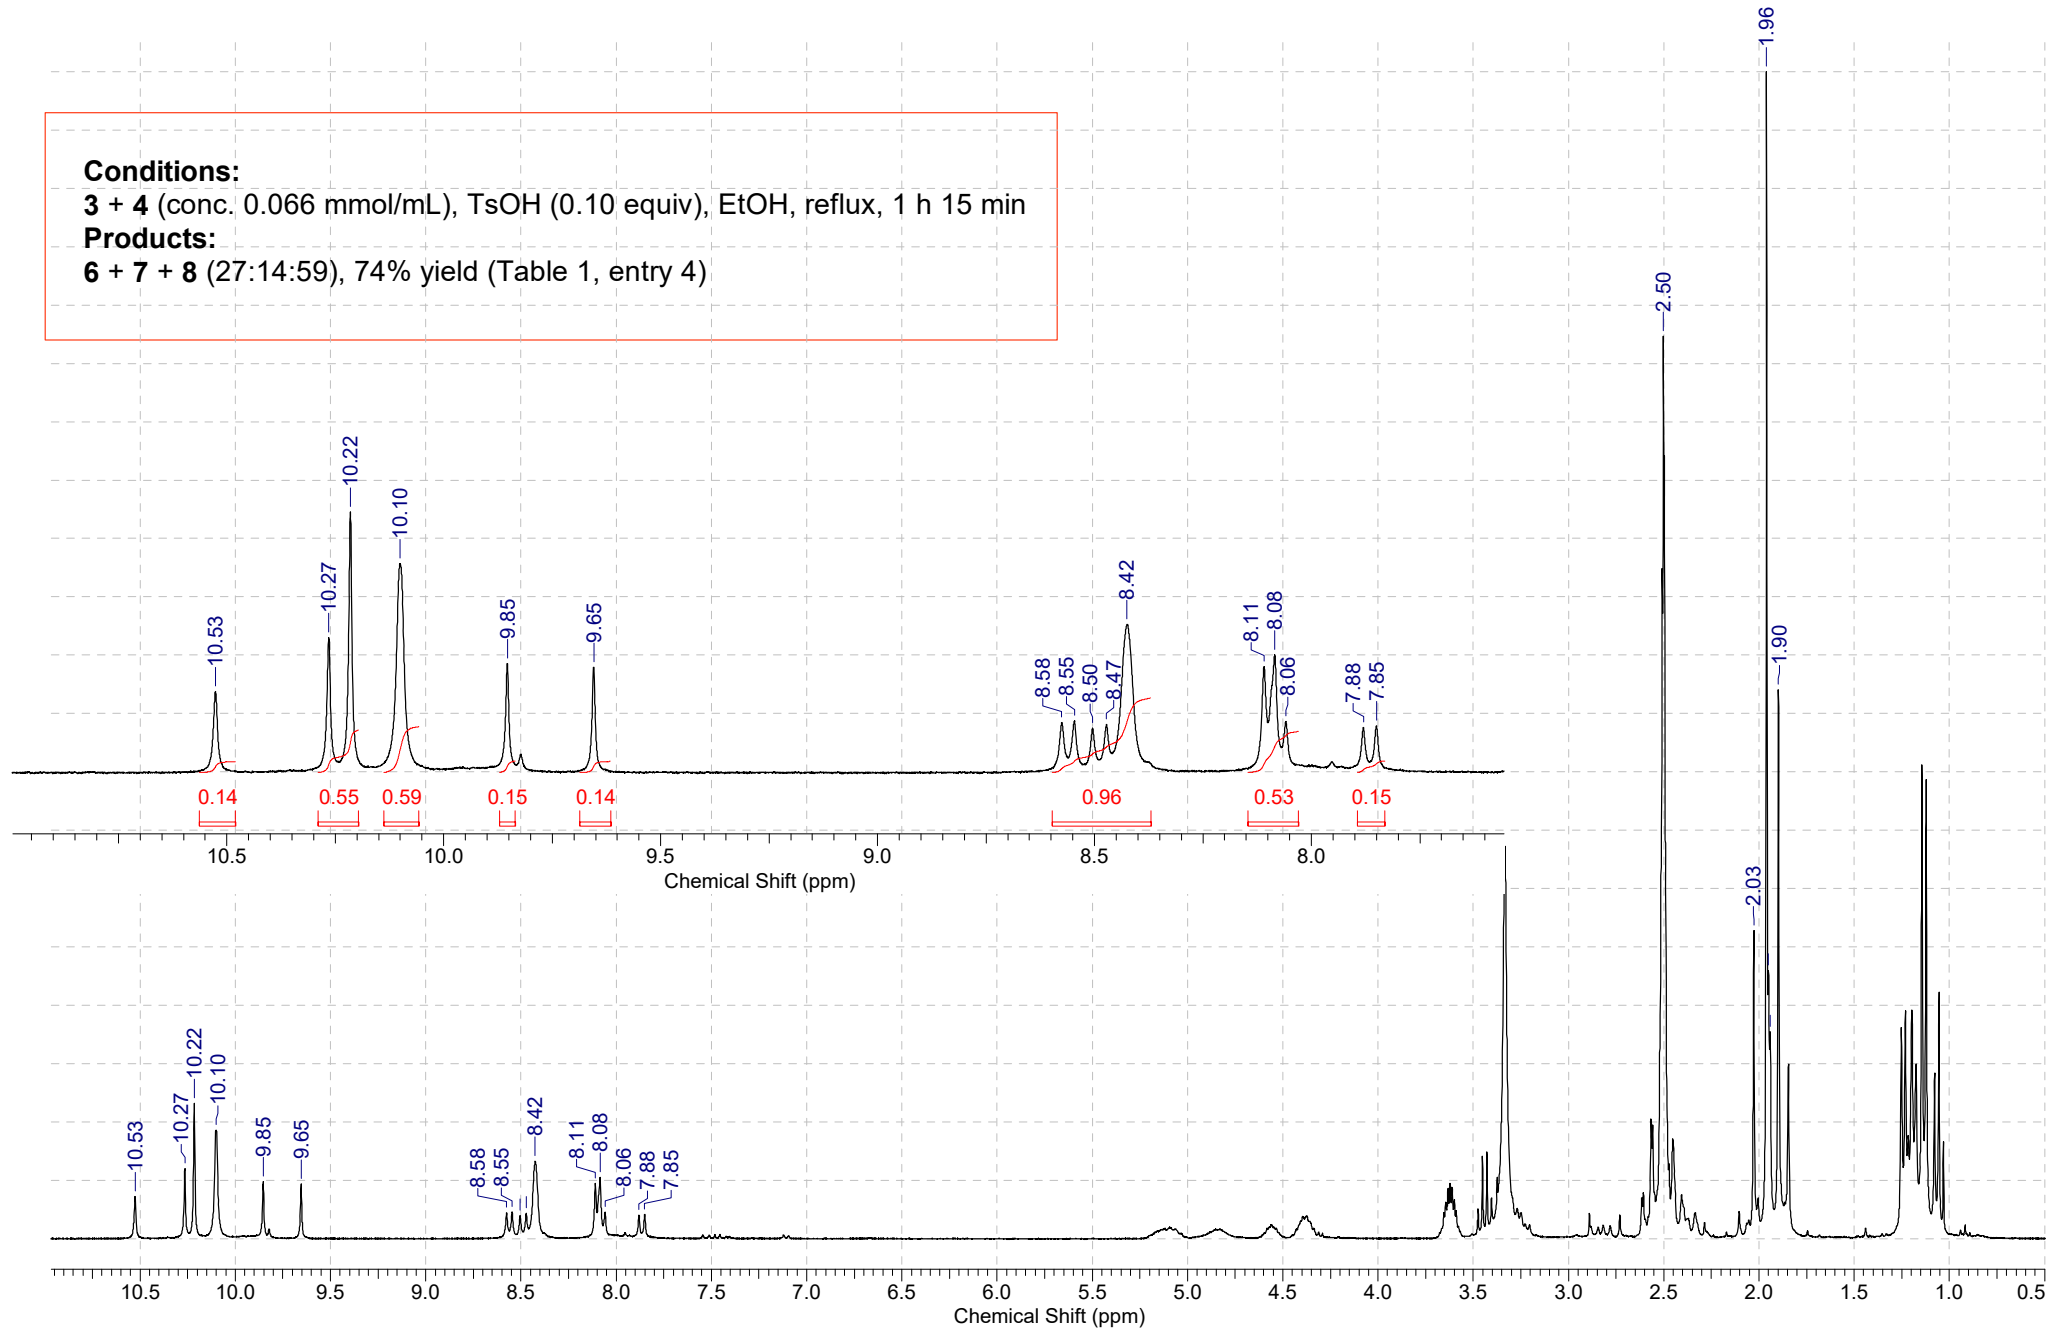

<sup>1</sup>H NMR spectrum of the crude product formed by the acid-catalyzed cyclization of the **3+4** mixture (Table 1, entry 8) (300.13 MHz, DMSO-*d*<sub>6</sub>)

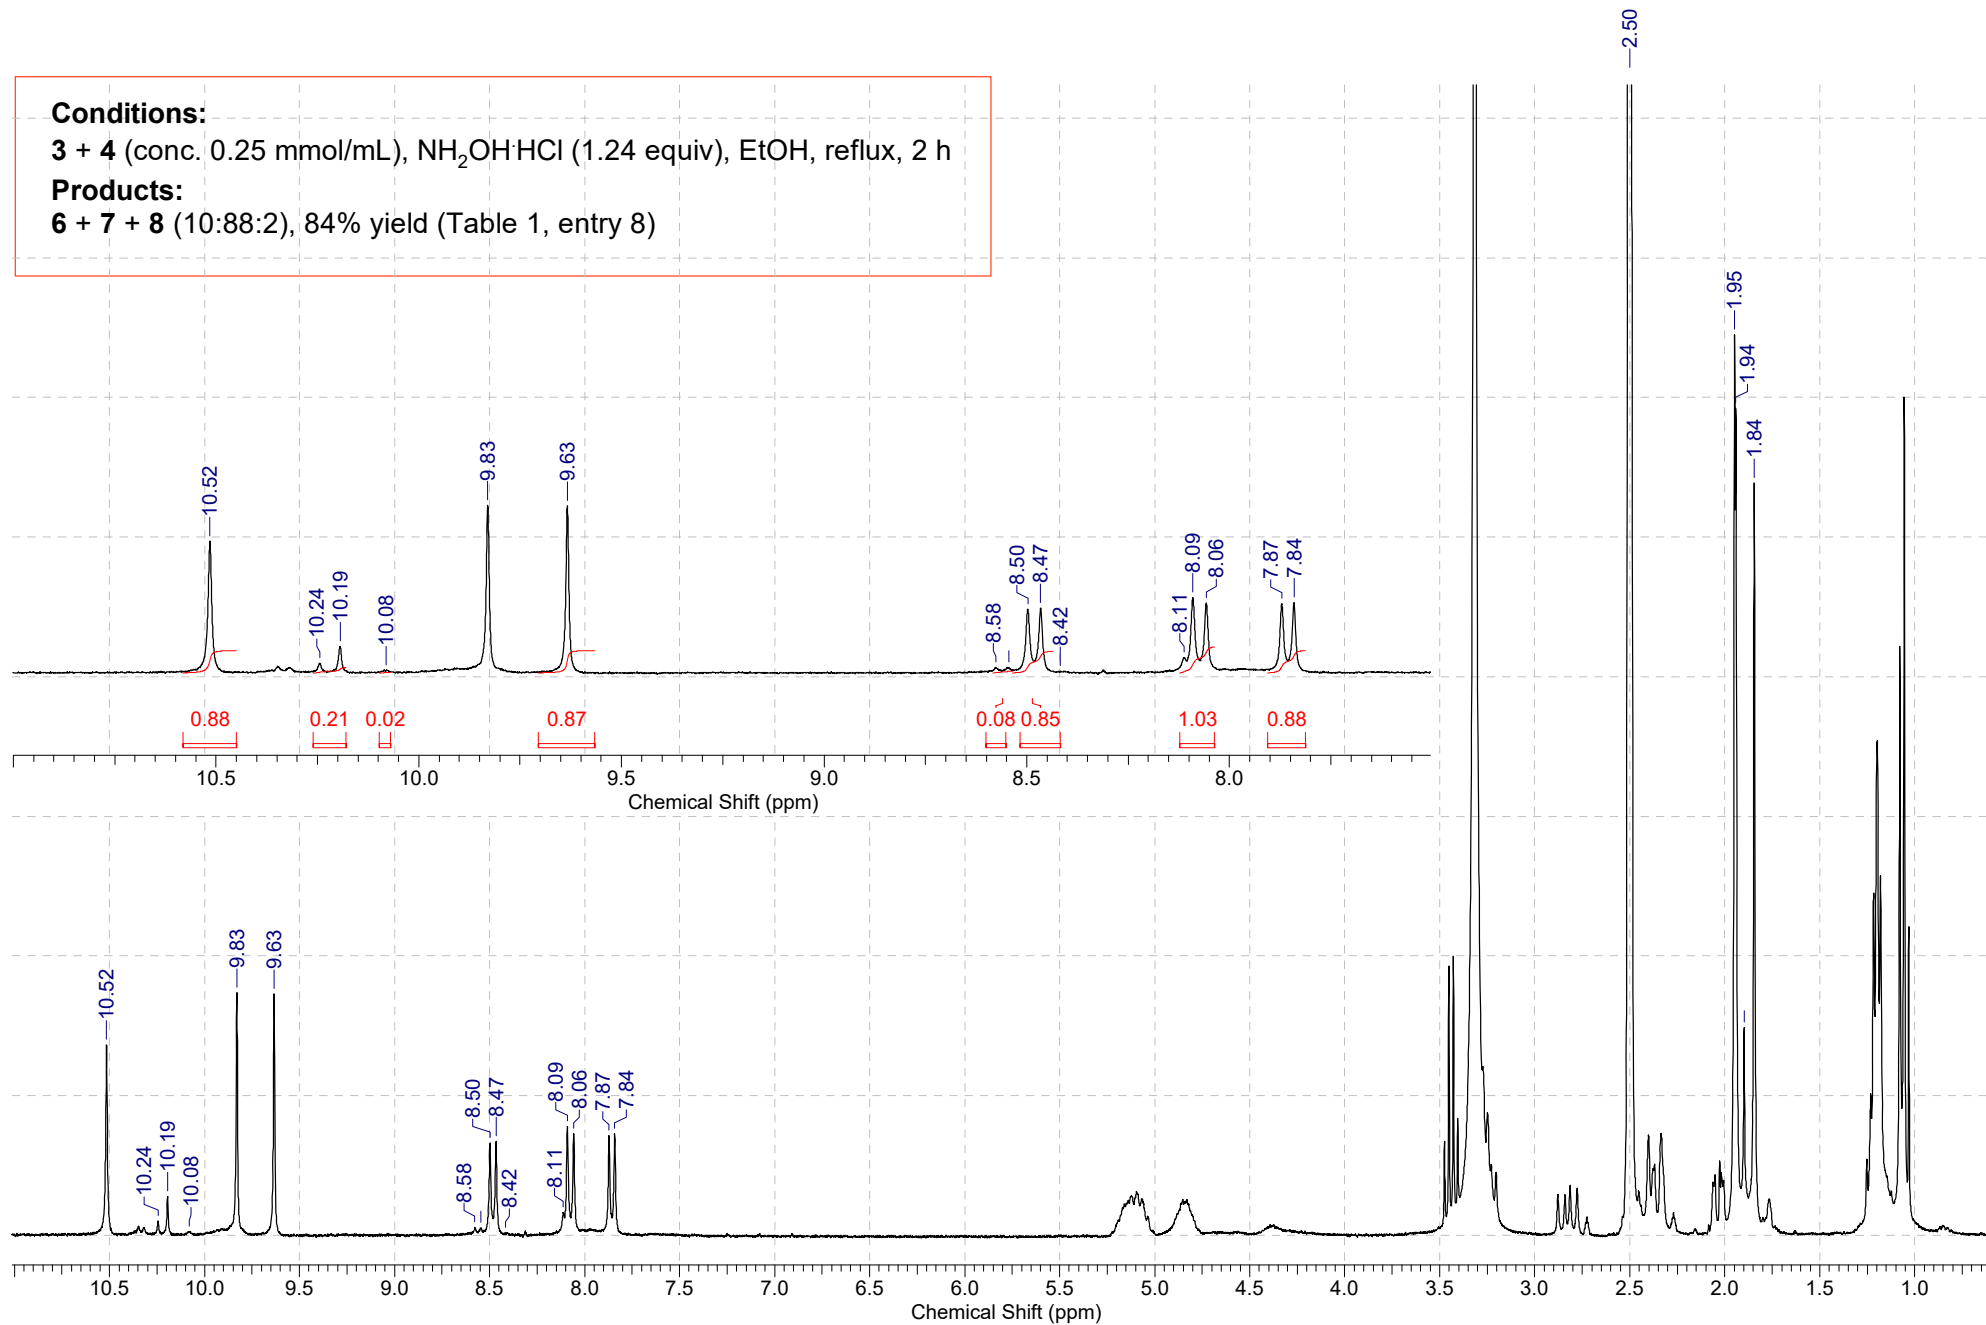

<sup>1</sup>H NMR spectrum of the crude product formed by the acid-catalyzed cyclization of the **3+4** mixture (Table 1, entry 10) (600.13 MHz, DMSO-*d*<sub>6</sub>)

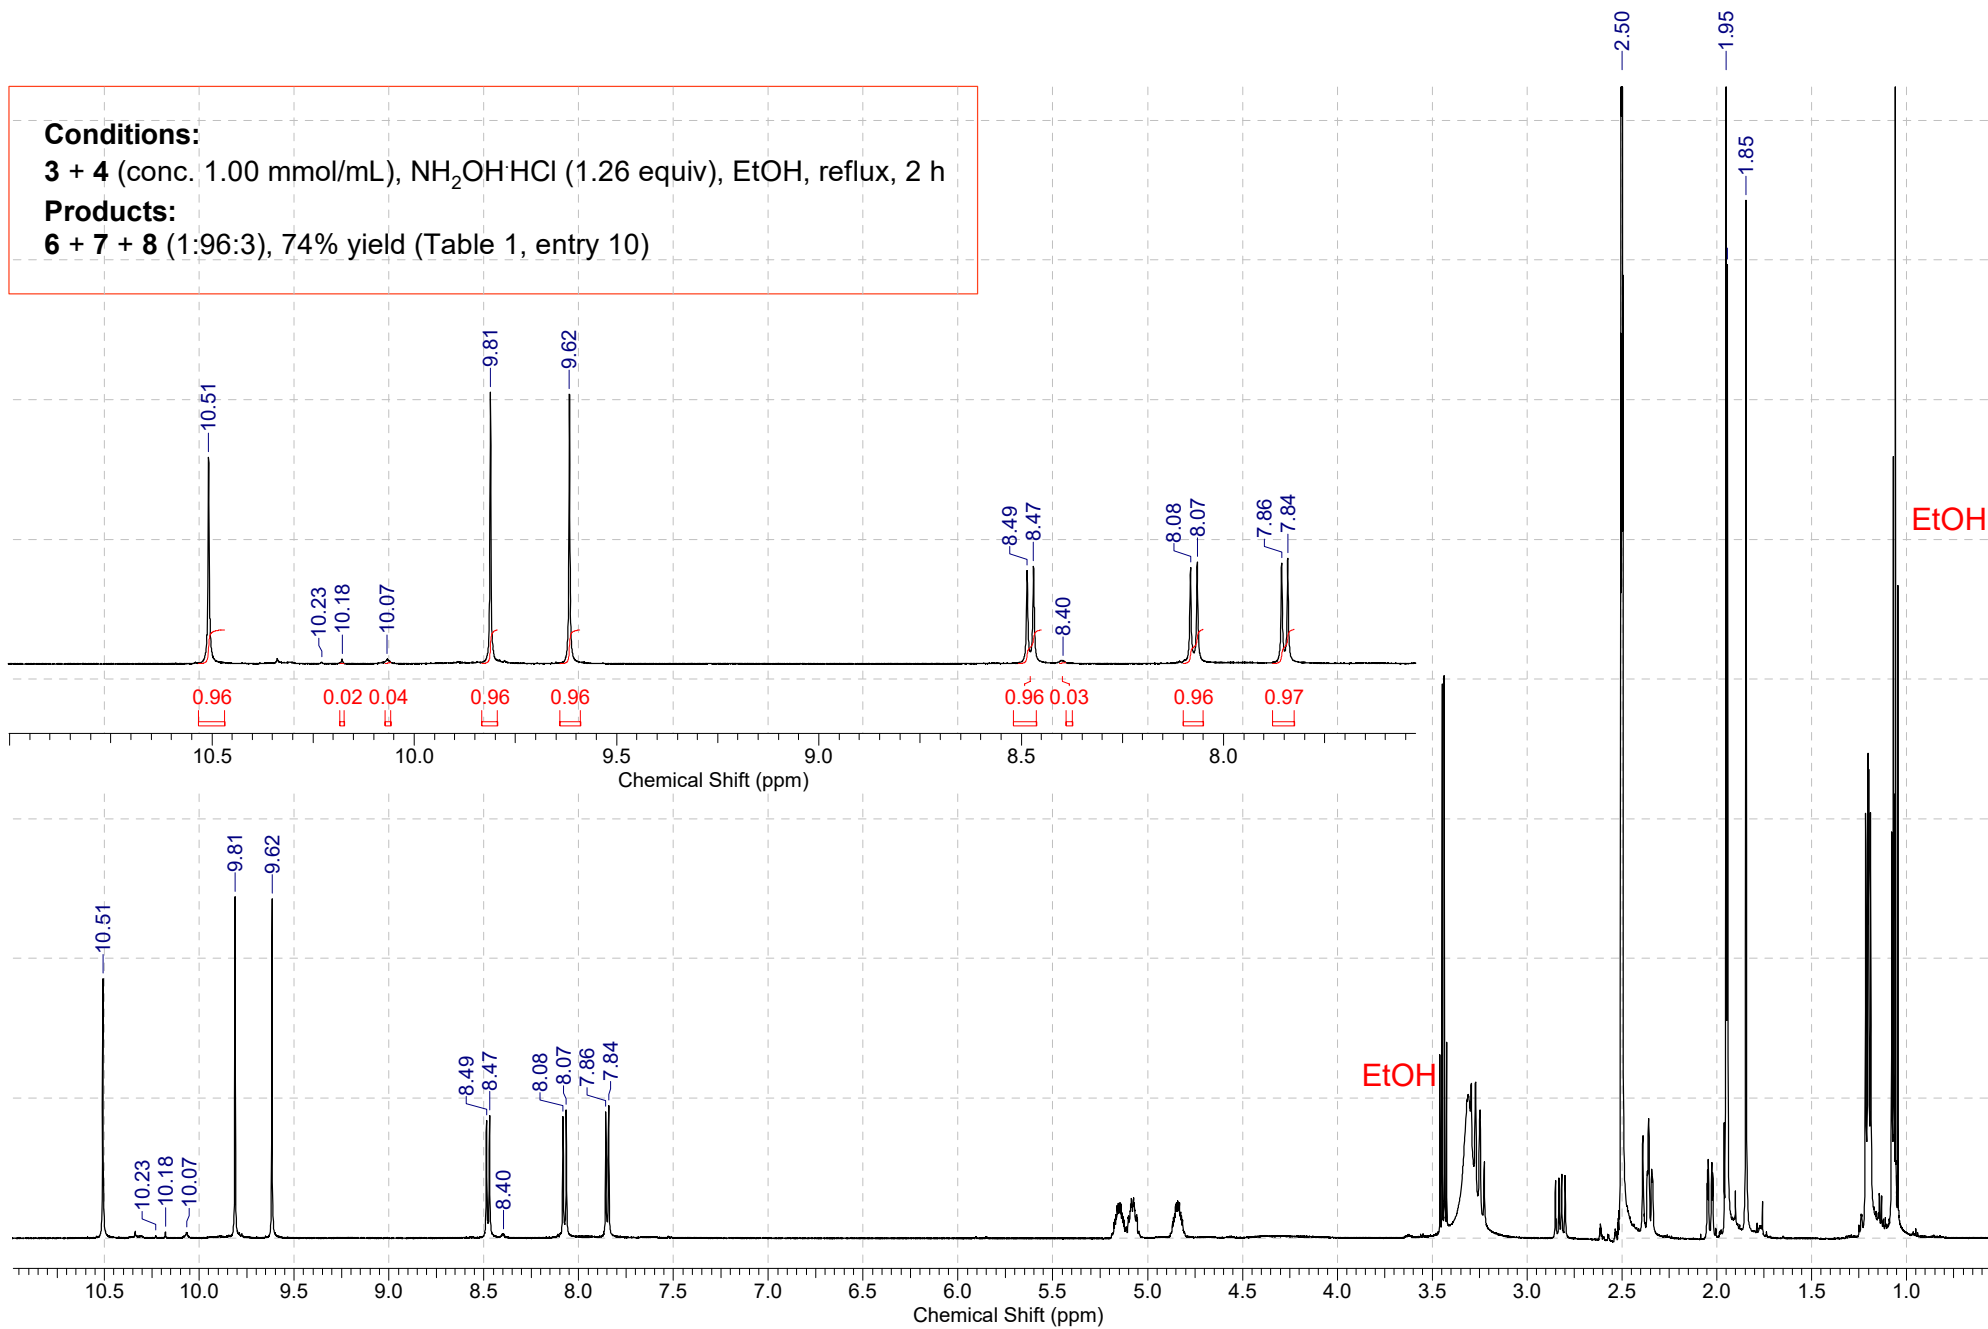



$^1\text{H}$  NMR spectrum of the crude product formed by the acid-catalyzed cyclization of the **3+4** mixture (Table 1, entry 11) (600.13 MHz,  $\text{DMSO-}d_6$ )

**Conditions:**

**3 + 4** (conc. 0.50 mmol/mL),  $\text{N}_2\text{H}_4$  (1.03 equiv), TsOH (1.15 equiv), MeCN, reflux, 2 h

**Products:**

**6 + 7** (99:1), 84% yield (Table 1, entry 11)

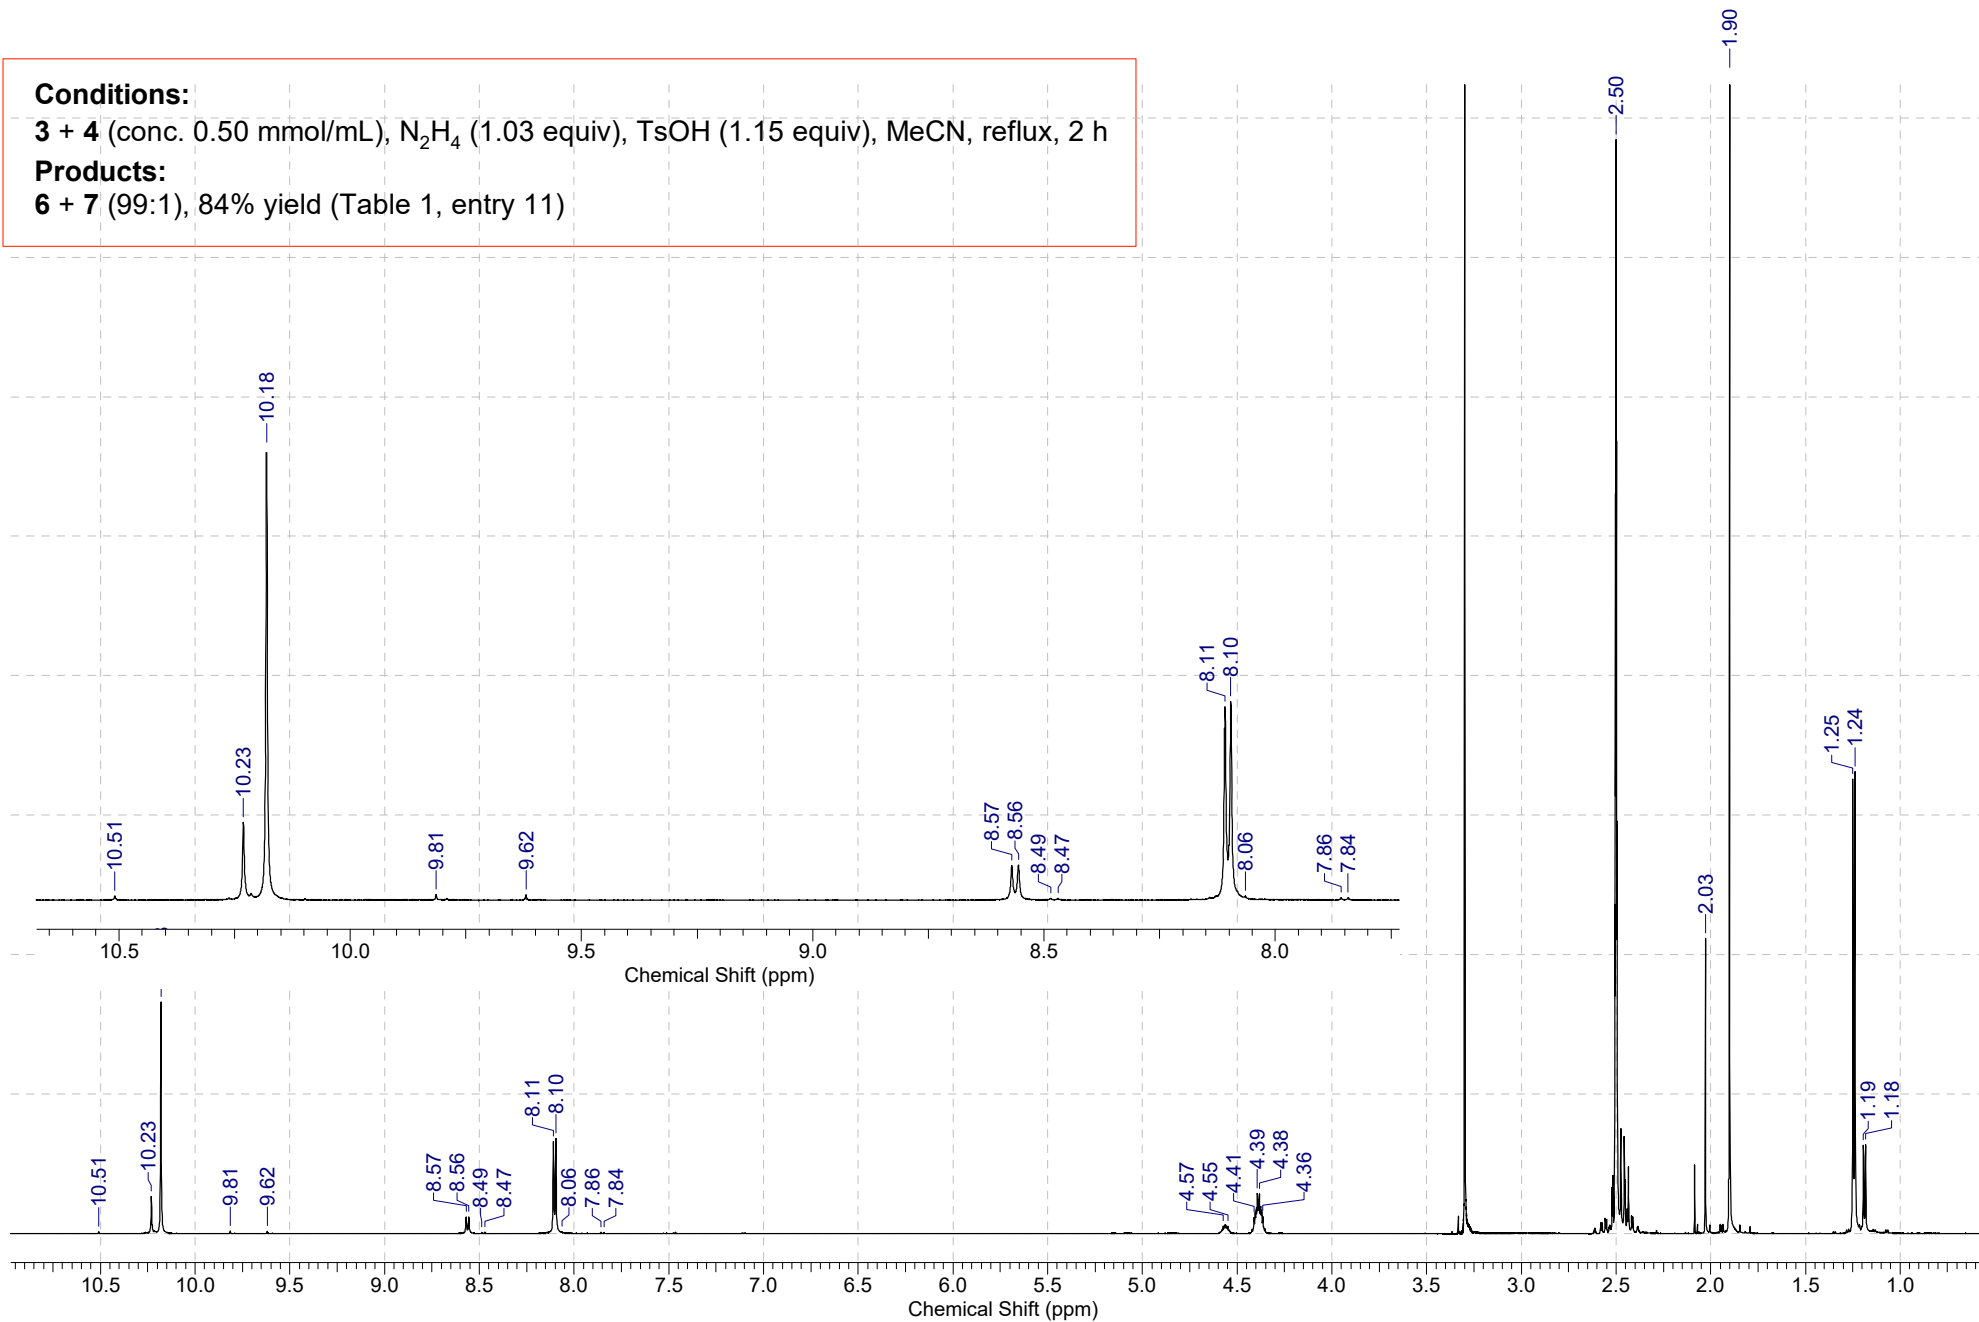

<sup>1</sup>H NMR spectrum of the crude product formed by the acid-catalyzed cyclization of hydrazone **5** (Table 1, entry 12) (300.13 MHz, DMSO-*d*<sub>6</sub>)

**Conditions:**  
**5** (conc. 0.51 mmol/mL), TsOH (1.10 equiv), MeCN, reflux, 2 h  
**Products:**  
**6 + 7** (99:1), 91% yield (Table 1, entry 12)

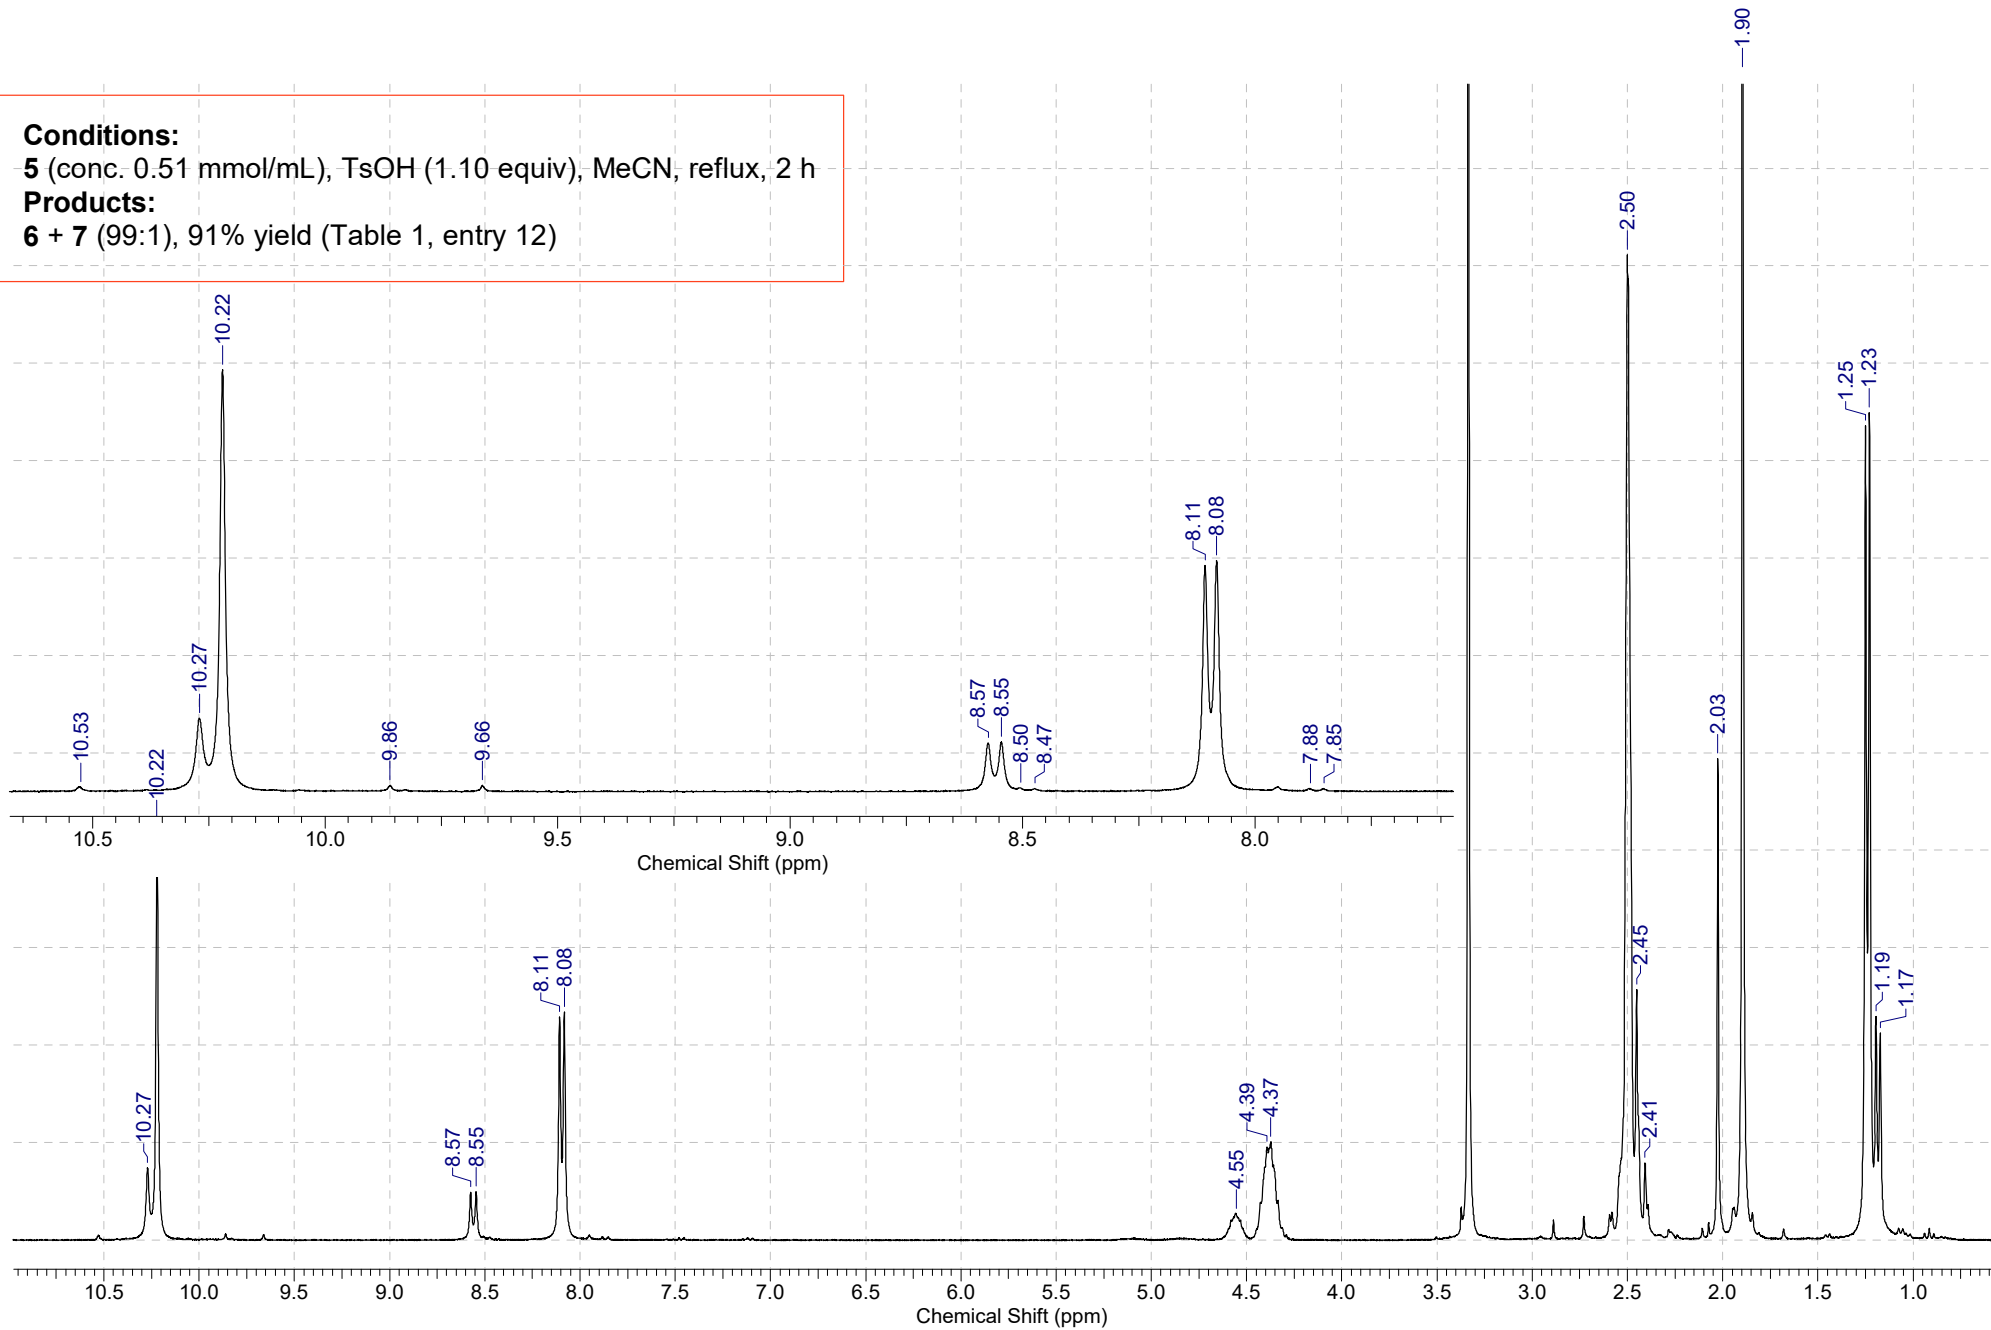

<sup>1</sup>H NMR spectrum of the crude product formed by the acid-catalyzed cyclization of hydrazone **5** (Table 1, entry 16) (600.13 MHz, DMSO-*d*<sub>6</sub>)

**Conditions:**  
**5** (conc. 0.46 mmol/mL), TsOH (1.11 equiv), MeCN, rt, 24 h  
**Products:**  
**6 + 7** (48:52), 91% yield (Table 1, entry 16)

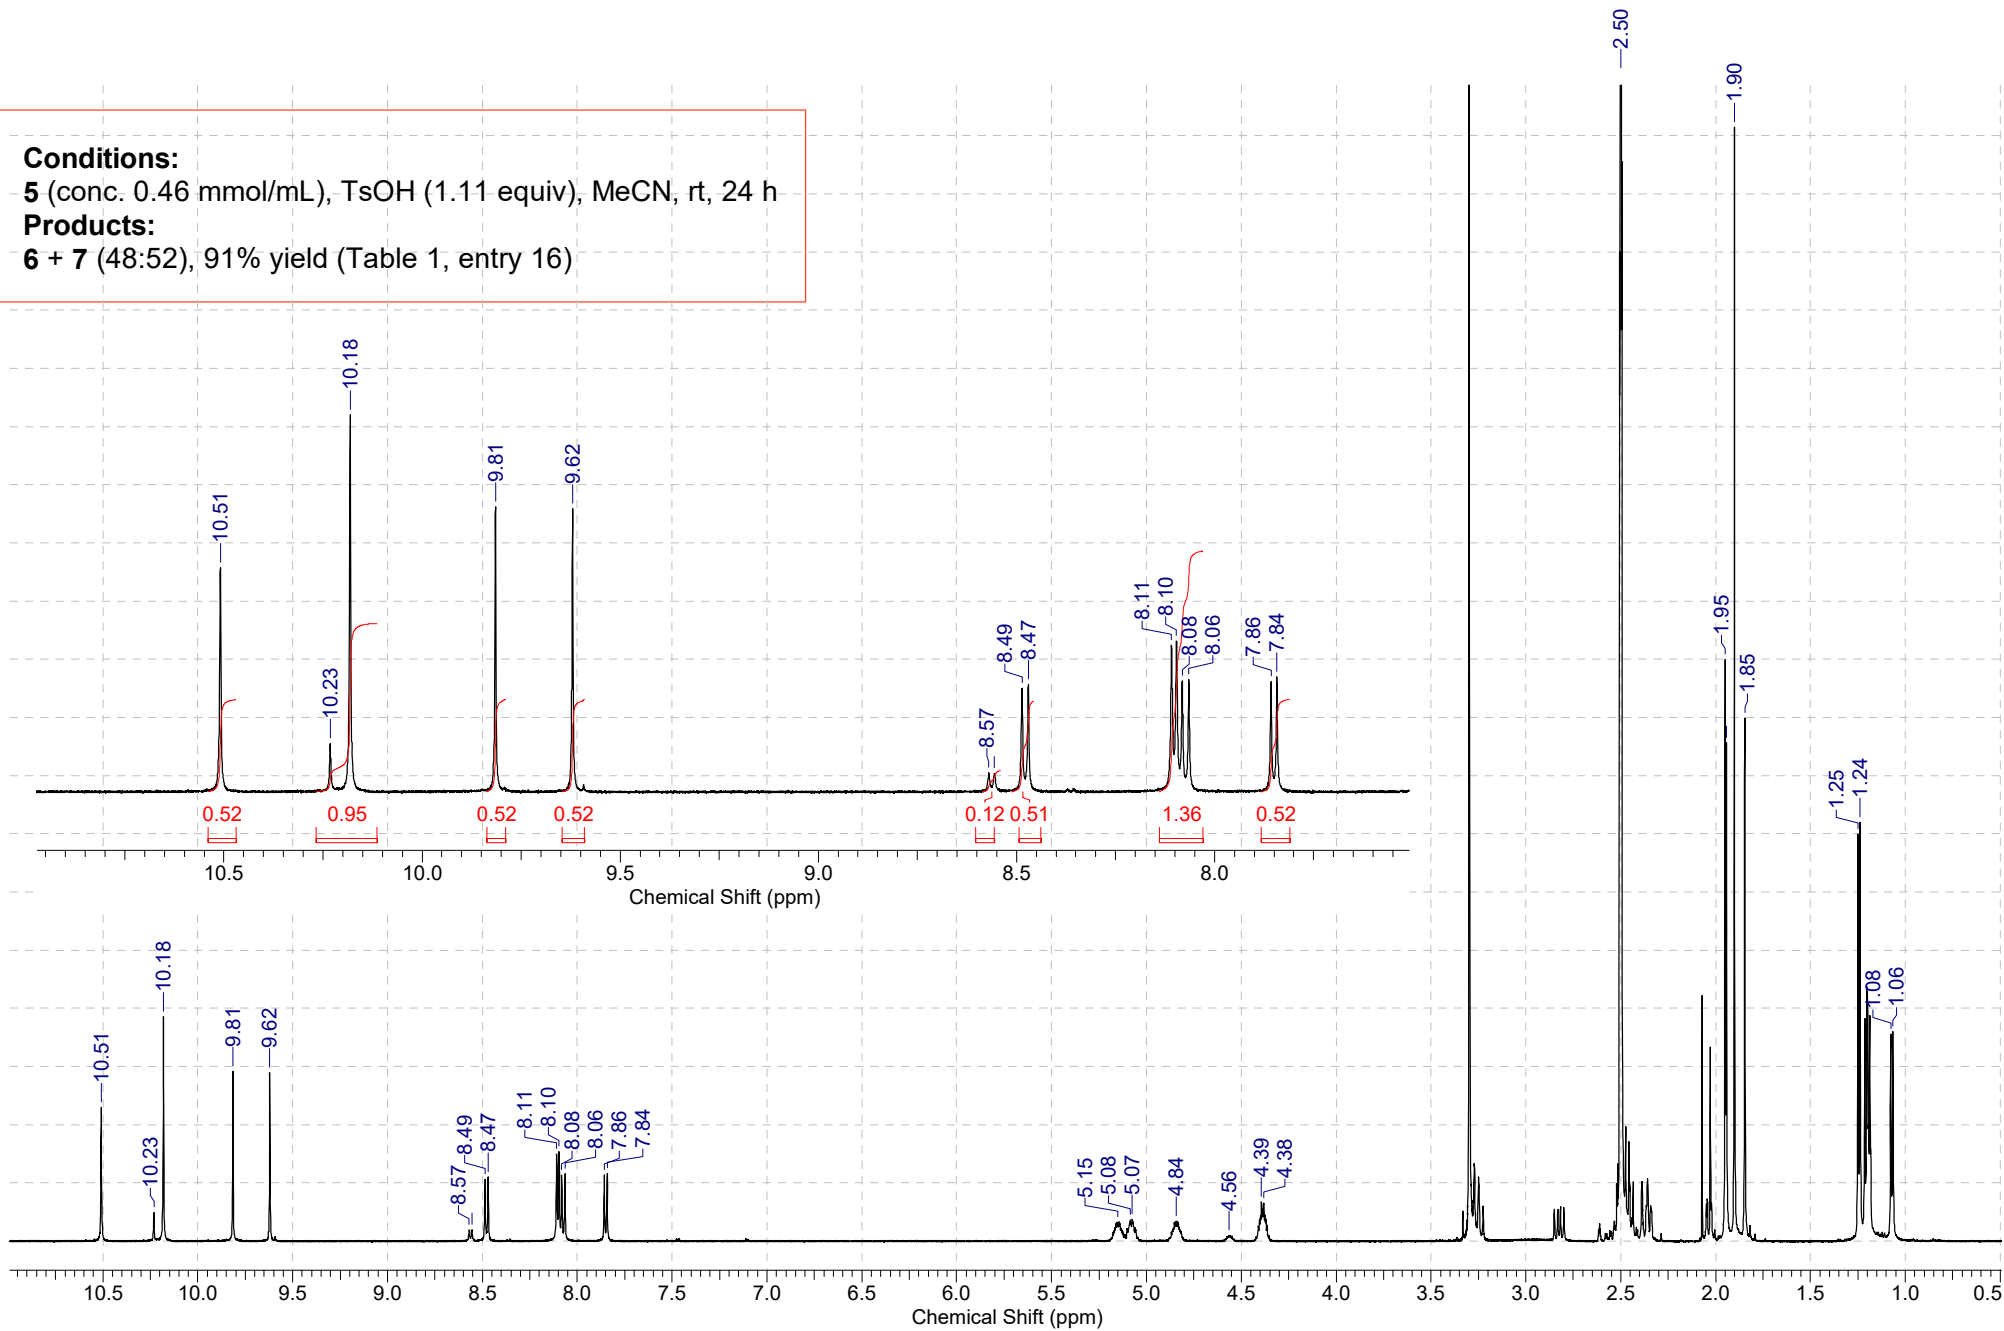

$^1\text{H}$  NMR spectrum of the crude product formed by the acid-catalyzed cyclization of hydrazone **5** (Table 1, entry 17) (600.13 MHz,  $\text{DMSO-}d_6$ )

**Conditions:**

**5** (conc. 0.47 mmol/mL), TsOH (1.11 equiv), EtOH, reflux, 2 h

**Products:**

**6 + 7** (30:70), 81% yield (Table 1, entry 17)

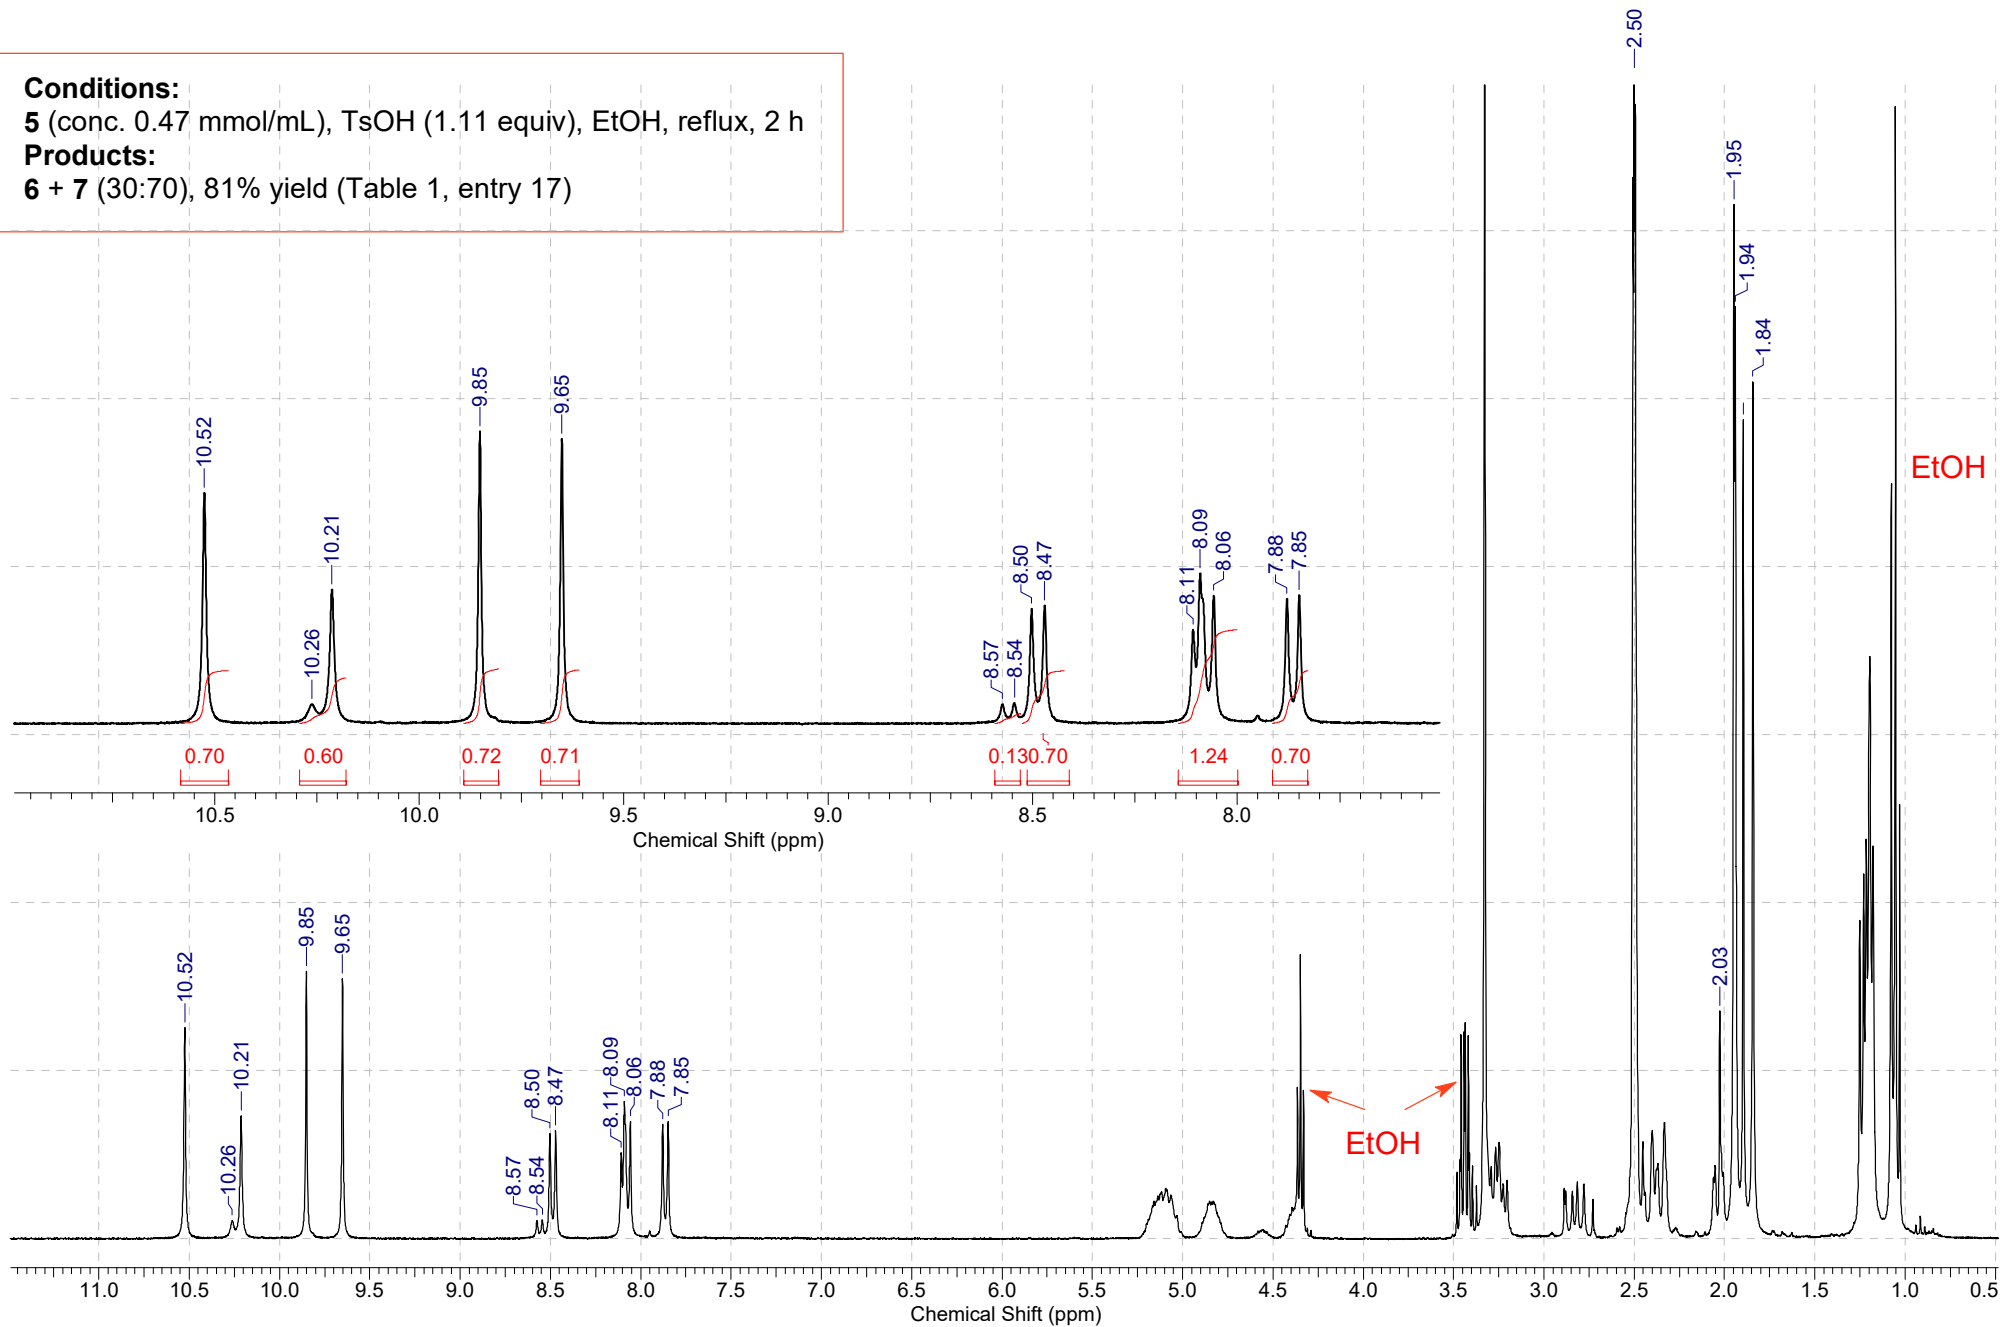

$^1\text{H}$  NMR spectrum of the crude product formed by the acid-catalyzed cyclization of hydrazone **5** (Table 1, entry 21) (600.13 MHz,  $\text{DMSO-}d_6$ )

**Conditions:**  
**5** (conc. 1.00 mmol/mL), TsOH (1.11 equiv), MeOH, reflux, 2 h  
**Products:**  
**6 + 7** (3:97), 83% yield (Table 1, entry 21)

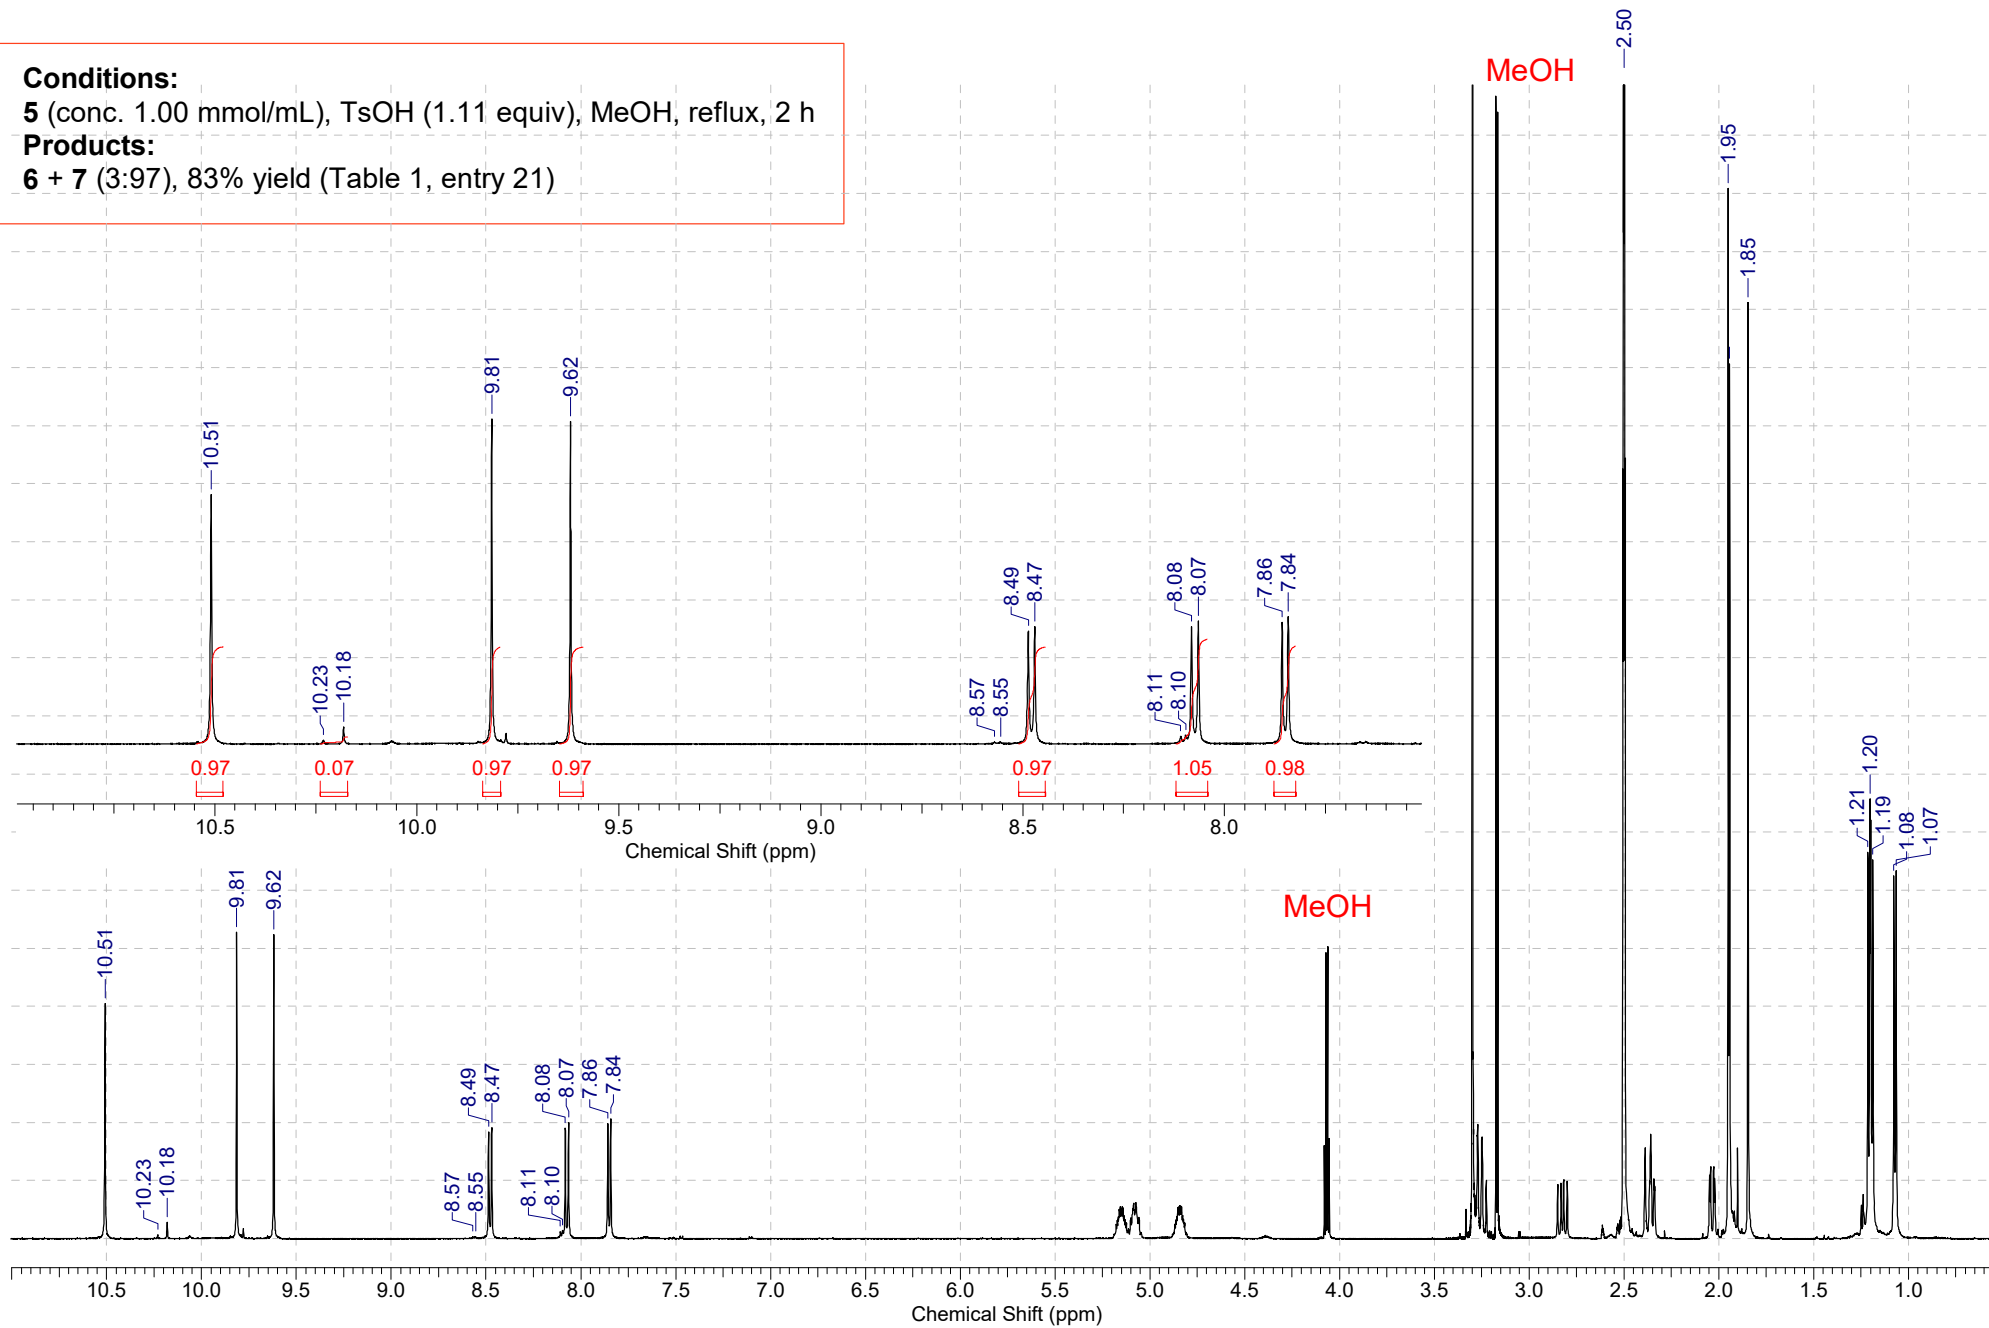

<sup>1</sup>H NMR spectrum of the crude product formed by the acid-catalyzed cyclization of hydrazone **5** (Table 1, entry 23) (600.13 MHz, DMSO-d<sub>6</sub>)

**Conditions:**  
**5** (conc. 1.00 mmol/mL), N<sub>2</sub>H<sub>4</sub> (1.00 equiv), TsOH (2.11 equiv), MeOH, reflux, 2 h  
**Products:**  
**6 + 7** (1:99), 78% yield (Table 1, entry 23)

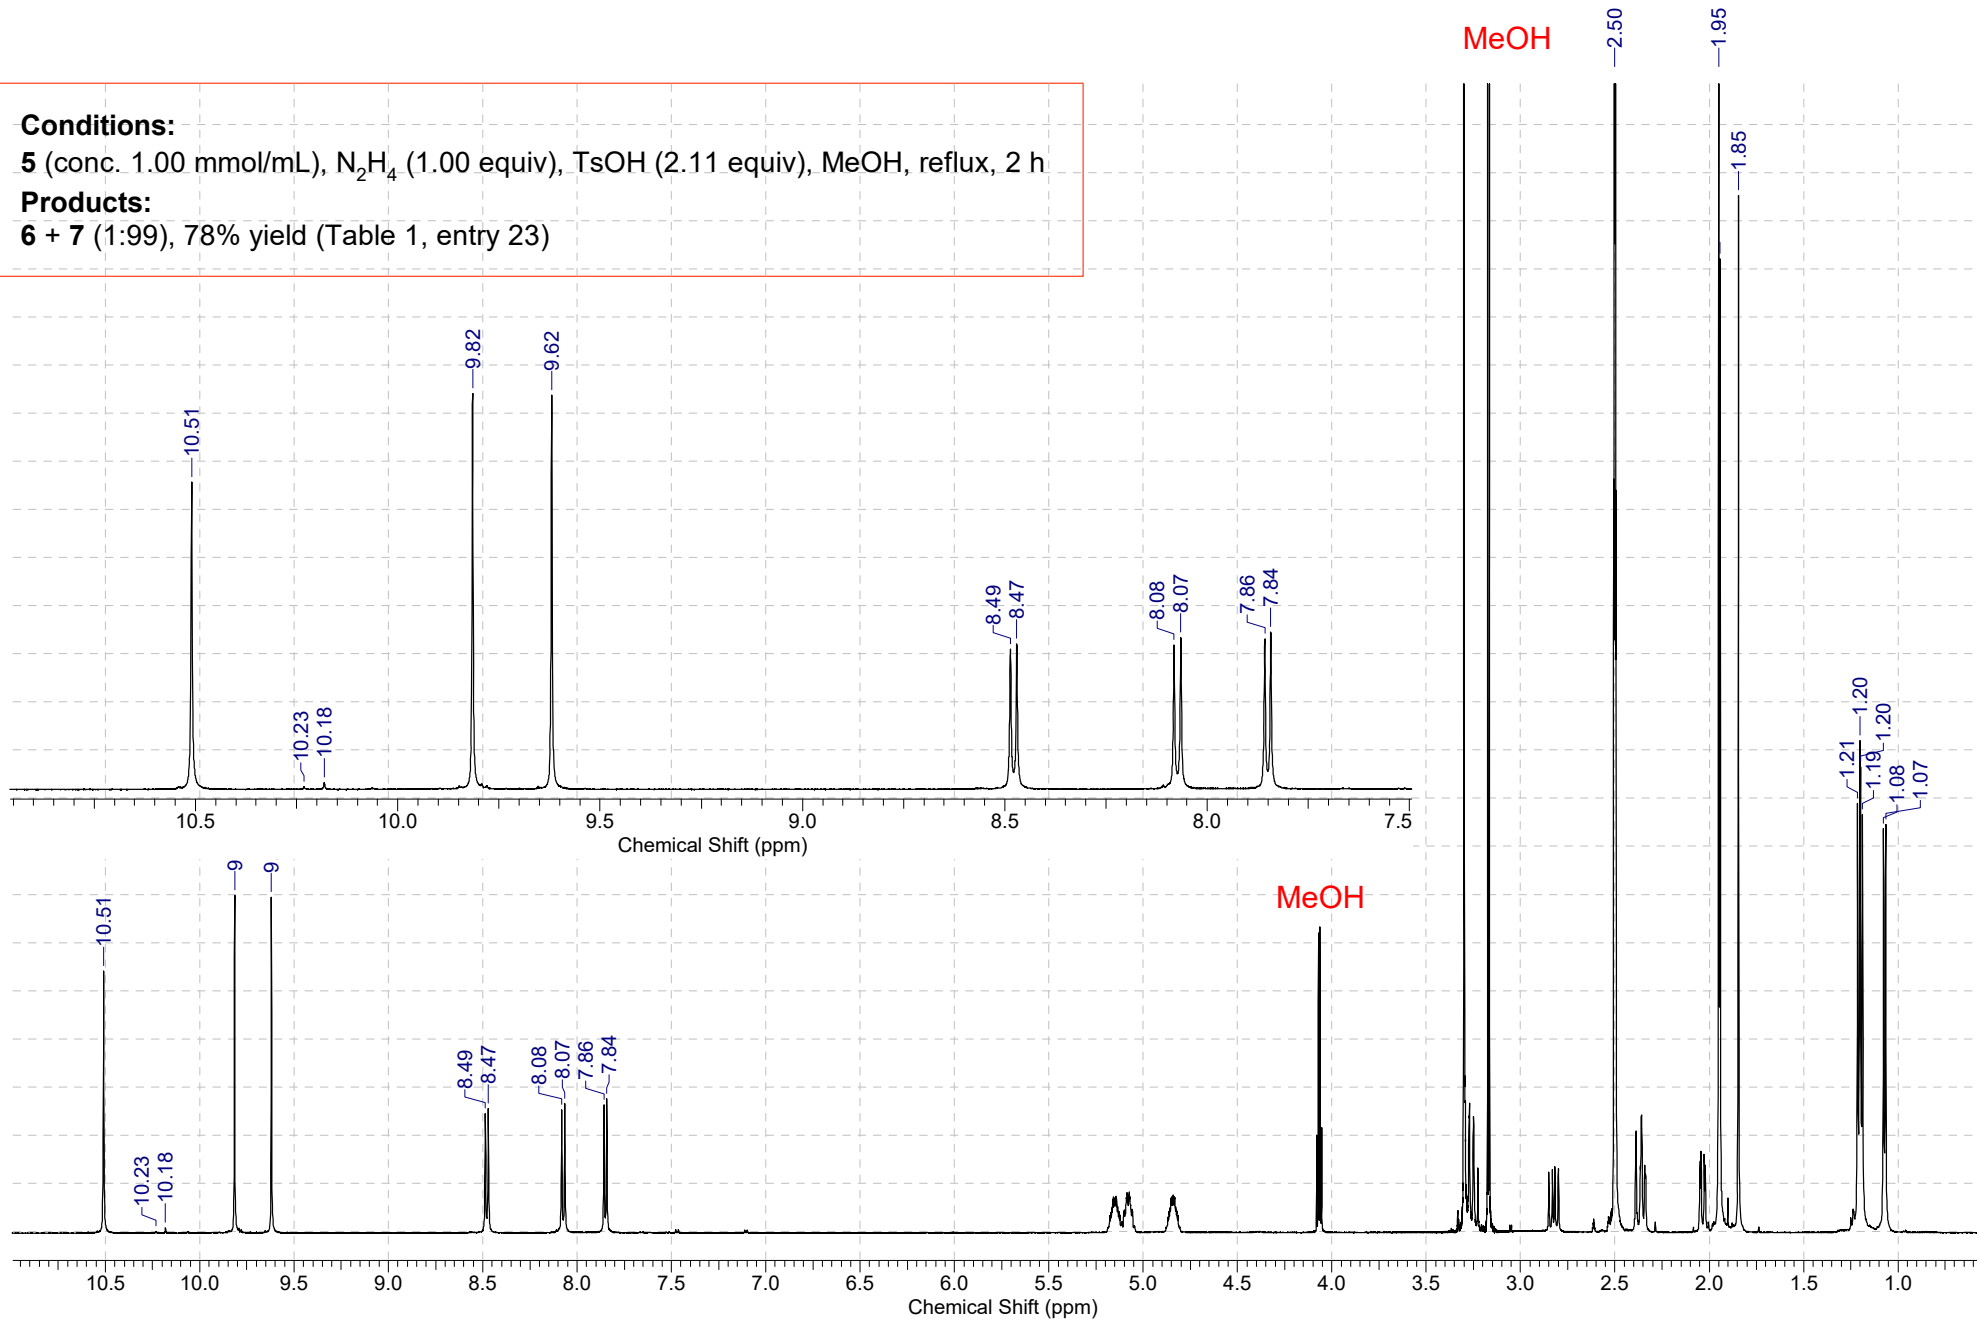

$^1\text{H}$  NMR spectrum of the crude product formed by the acid-catalyzed cyclization of hydrazone **5** (Table 1, entry 28) (600.13 MHz,  $\text{DMSO-}d_6$ )

**Conditions:**

**5** (conc. 0.41 mmol/mL),  $\text{N}_2\text{H}_4$  (1.00 equiv), TsOH (2.10 equiv), MeOH, rt, 24 h

**Product:**

**7**, 91% yield (Table 1, entry 28)

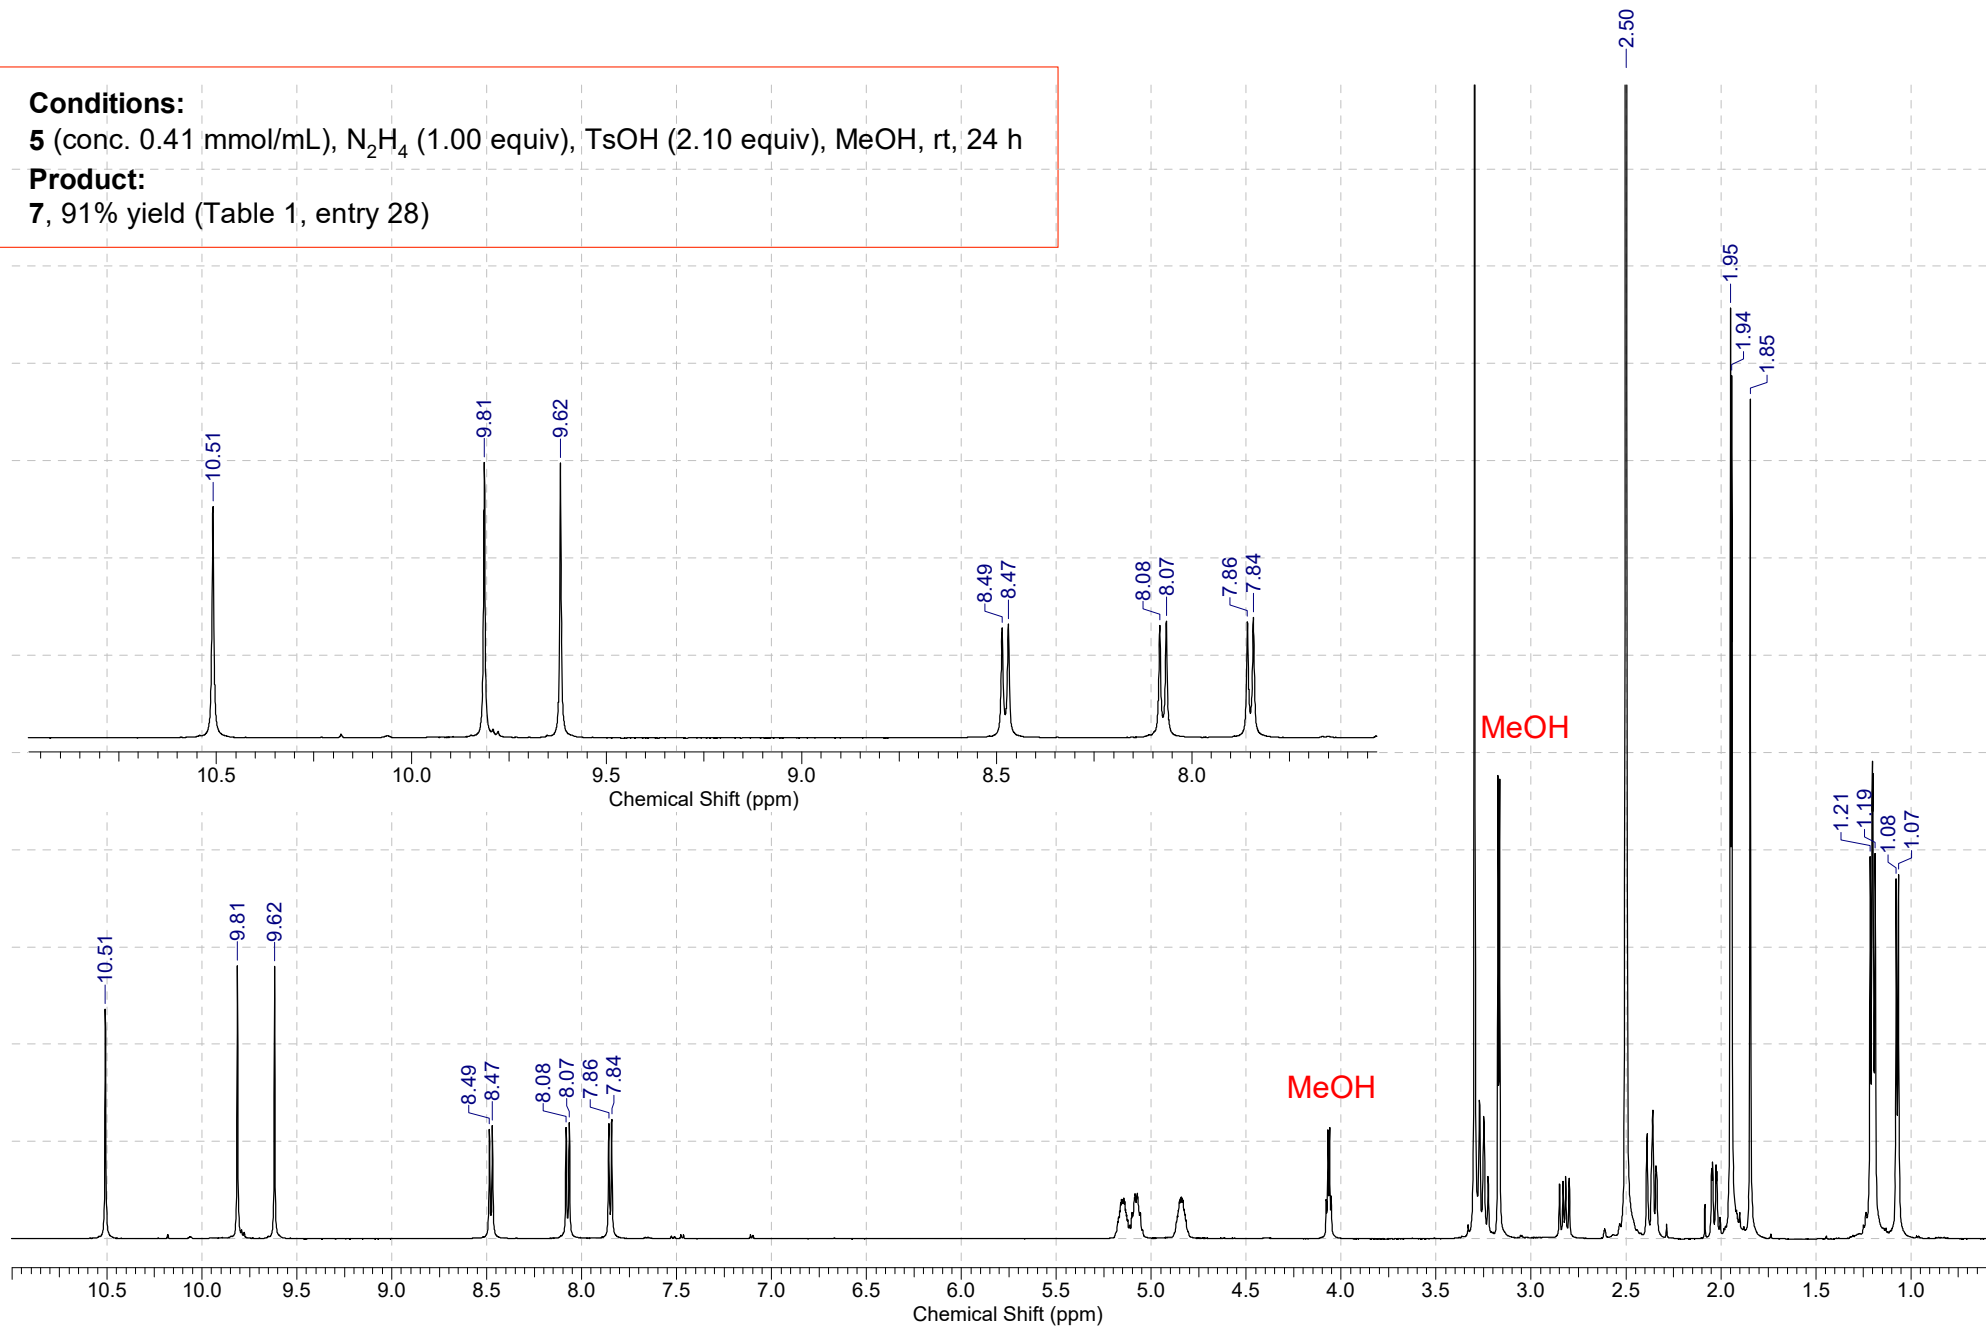

<sup>1</sup>H NMR spectrum of 14-membered cyclic bis-thiosemicarbazone **6** (600.13 MHz, DMSO-*d*<sub>6</sub>)

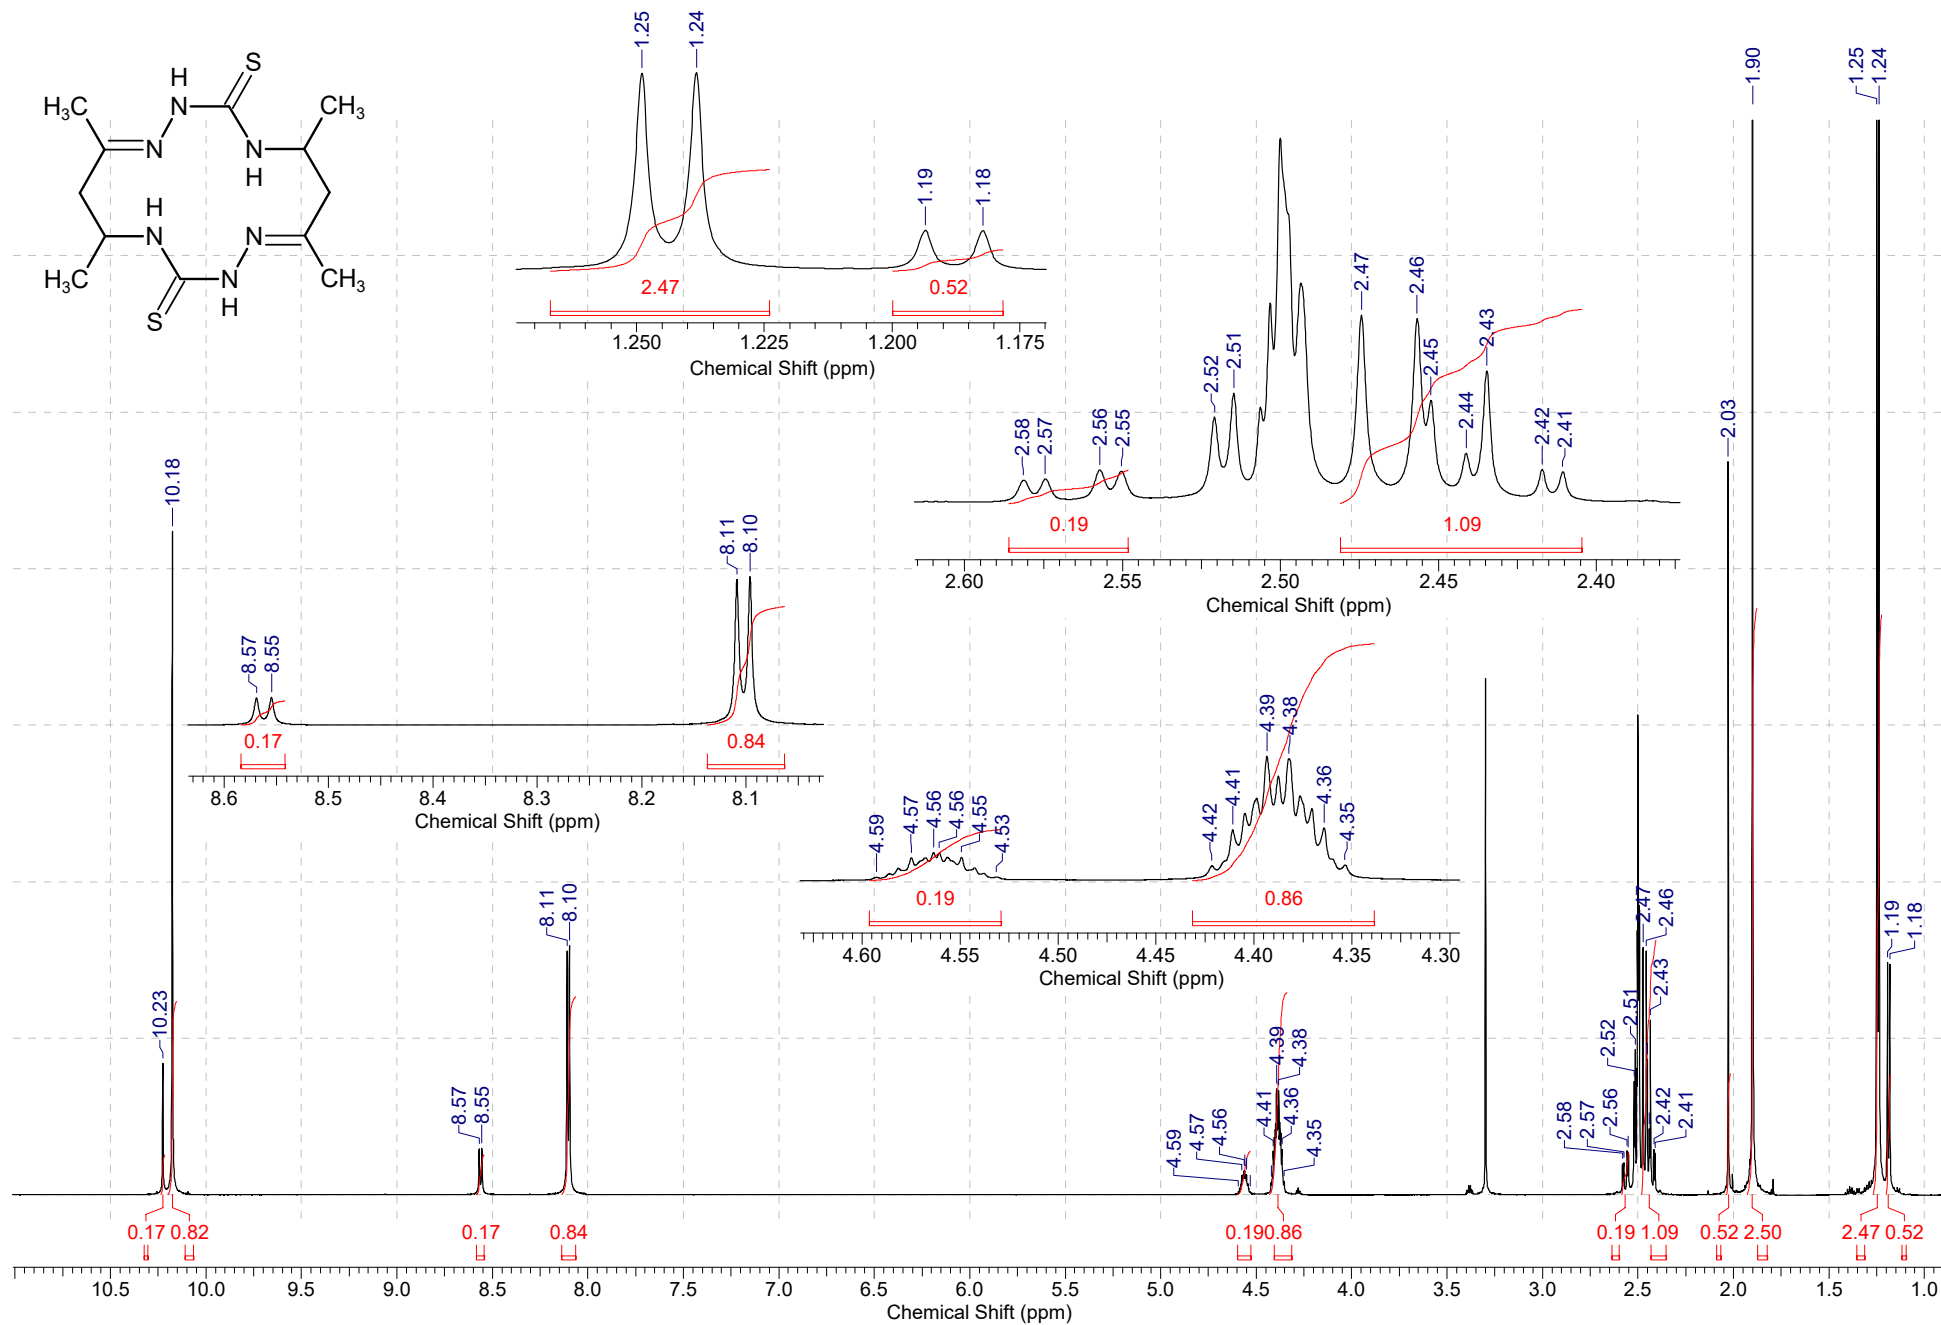



<sup>13</sup>C NMR spectrum of 14-membered cyclic bis-thiosemicarbazone **6** (150.90 MHz, DMSO-*d*<sub>6</sub>)

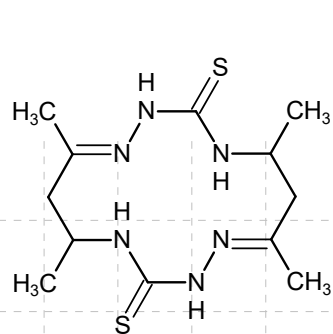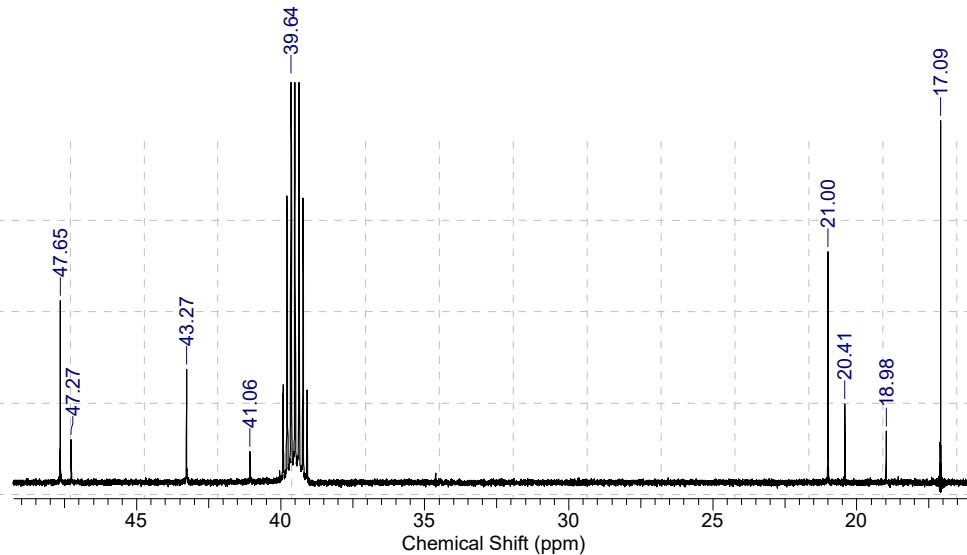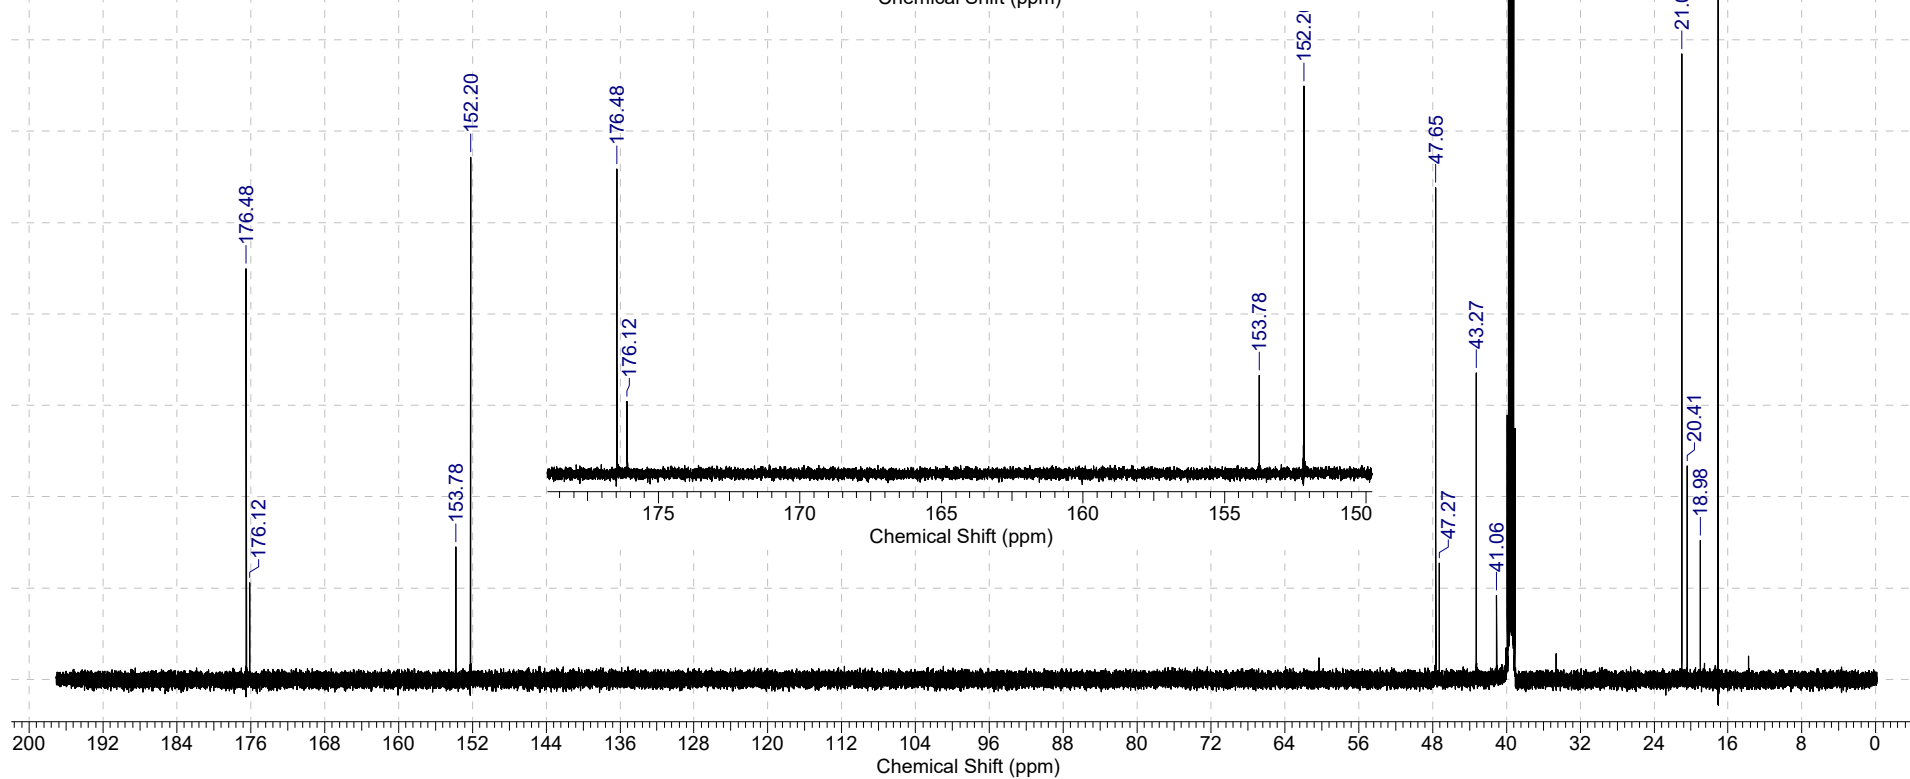

$^1\text{H}, ^1\text{H}$  COSY spectrum of 14-membered cyclic bis-thiosemicarbazone **6** (600.13 MHz,  $\text{DMSO-}d_6$ )

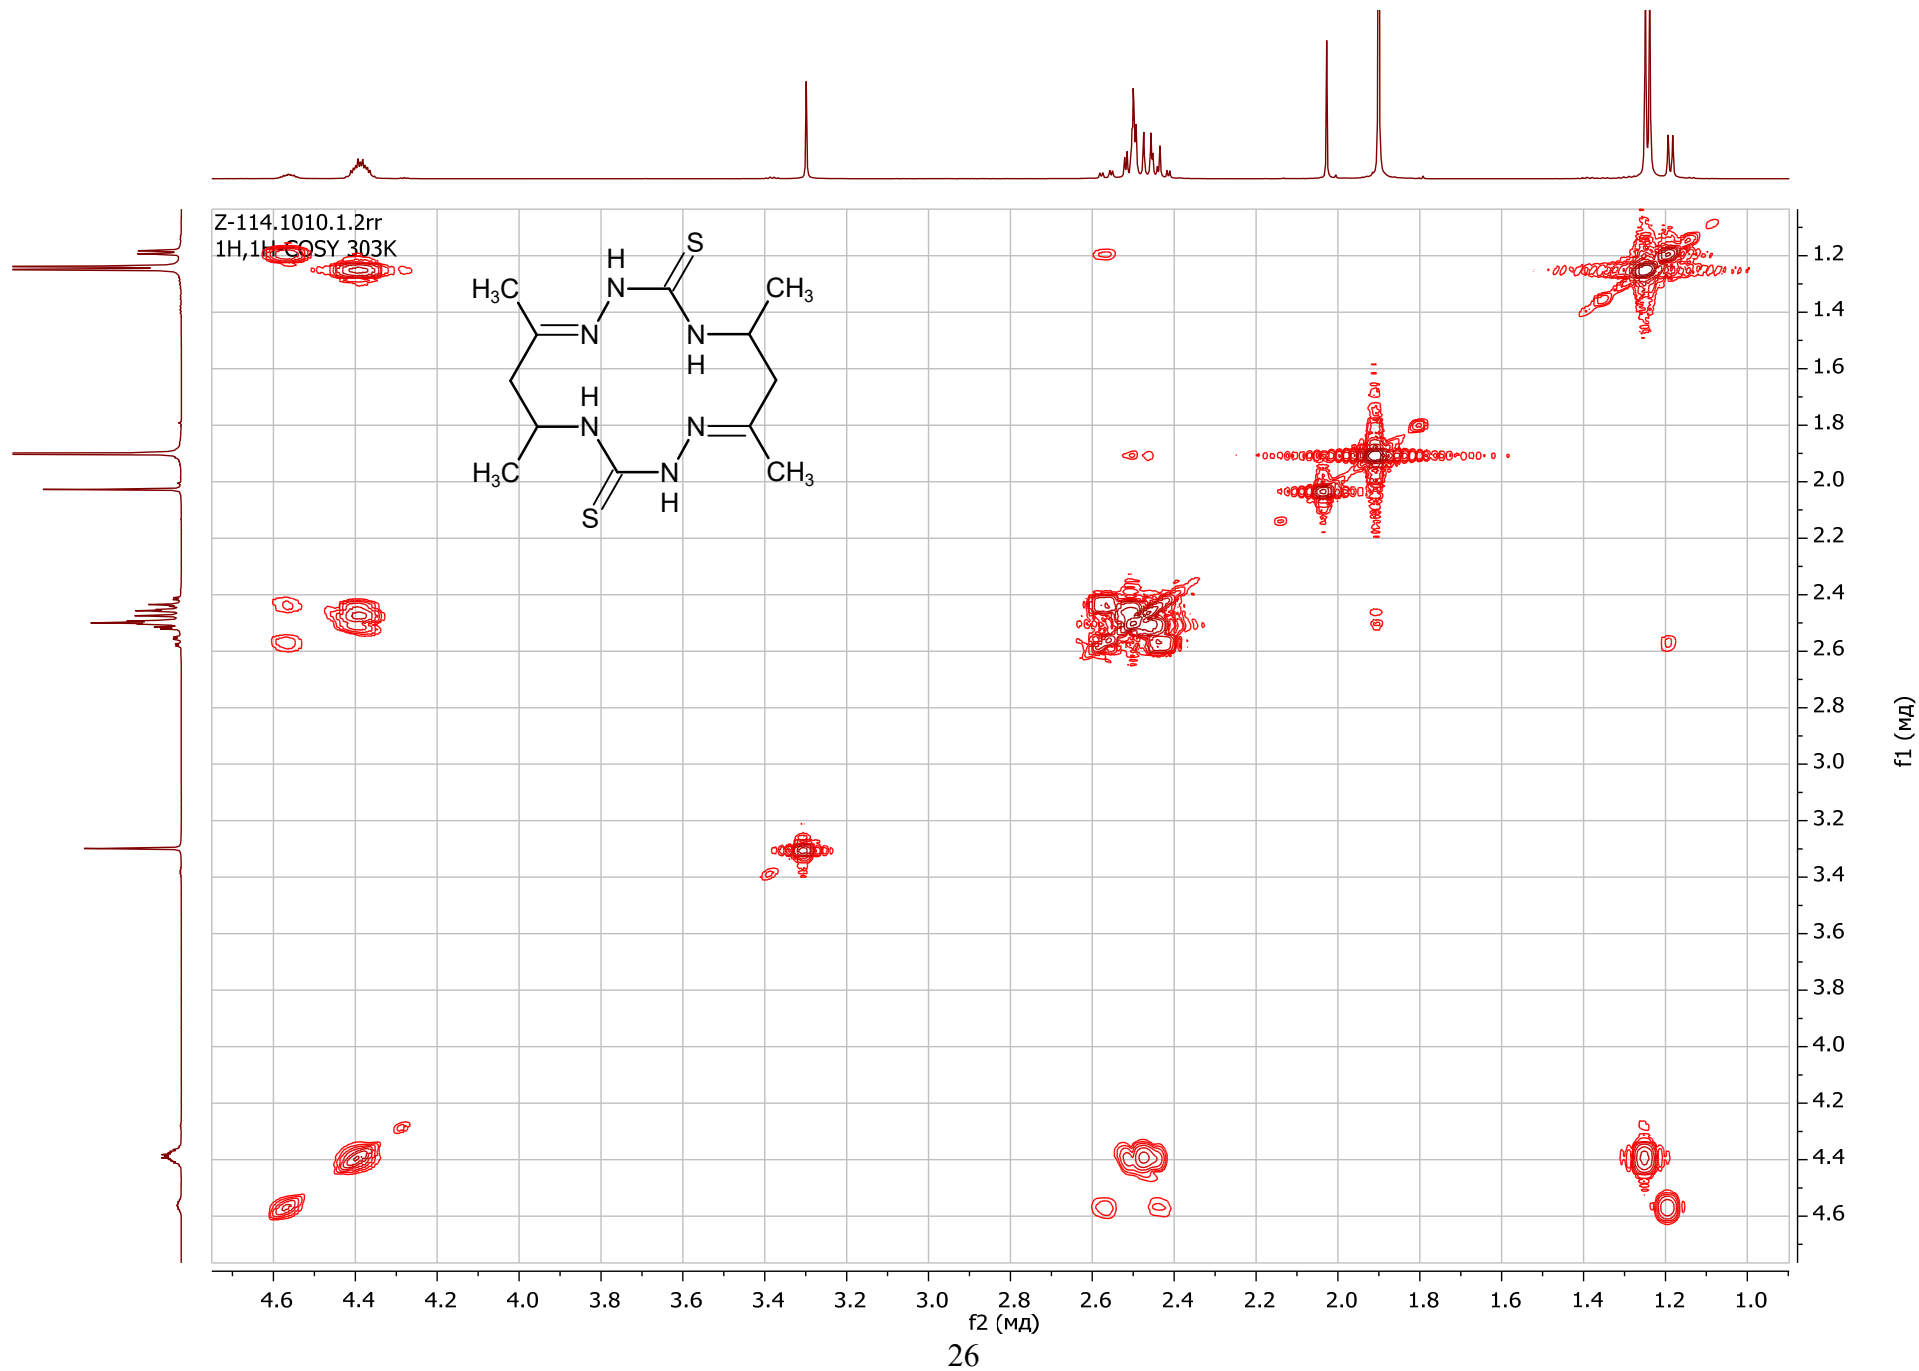

$^1\text{H}, ^{13}\text{C}$  HSQC spectrum of 14-membered cyclic bis-thiosemicarbazone **6** (Bruker Avance III,  $\text{DMSO-}d_6$ )

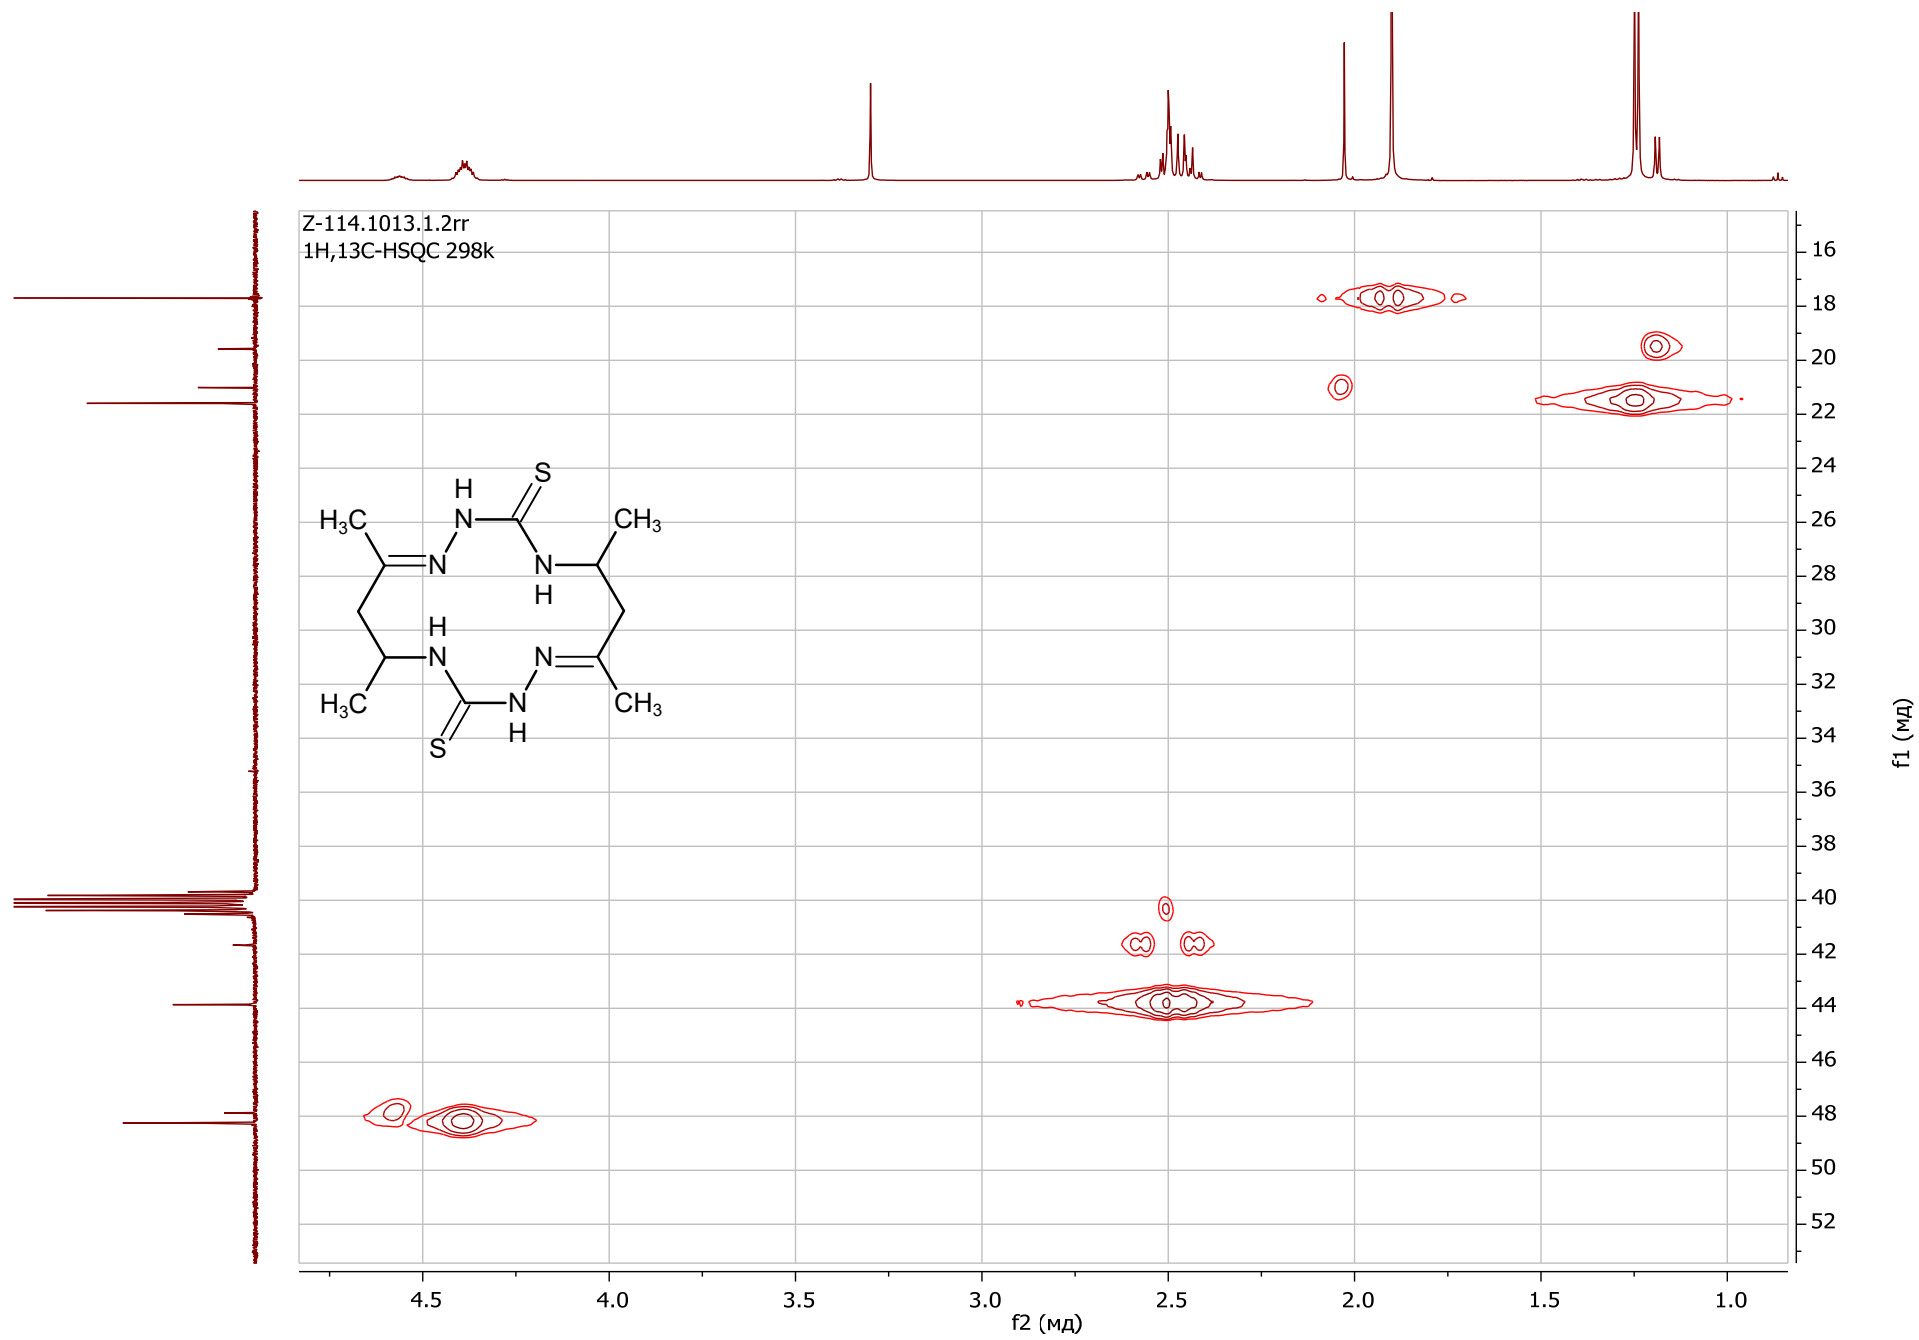

$^1\text{H}, ^1\text{H}$  NOESY spectrum of 14-membered cyclic bis-thiosemicarbazone **6** (600.13 MHz,  $\text{DMSO-}d_6$ )

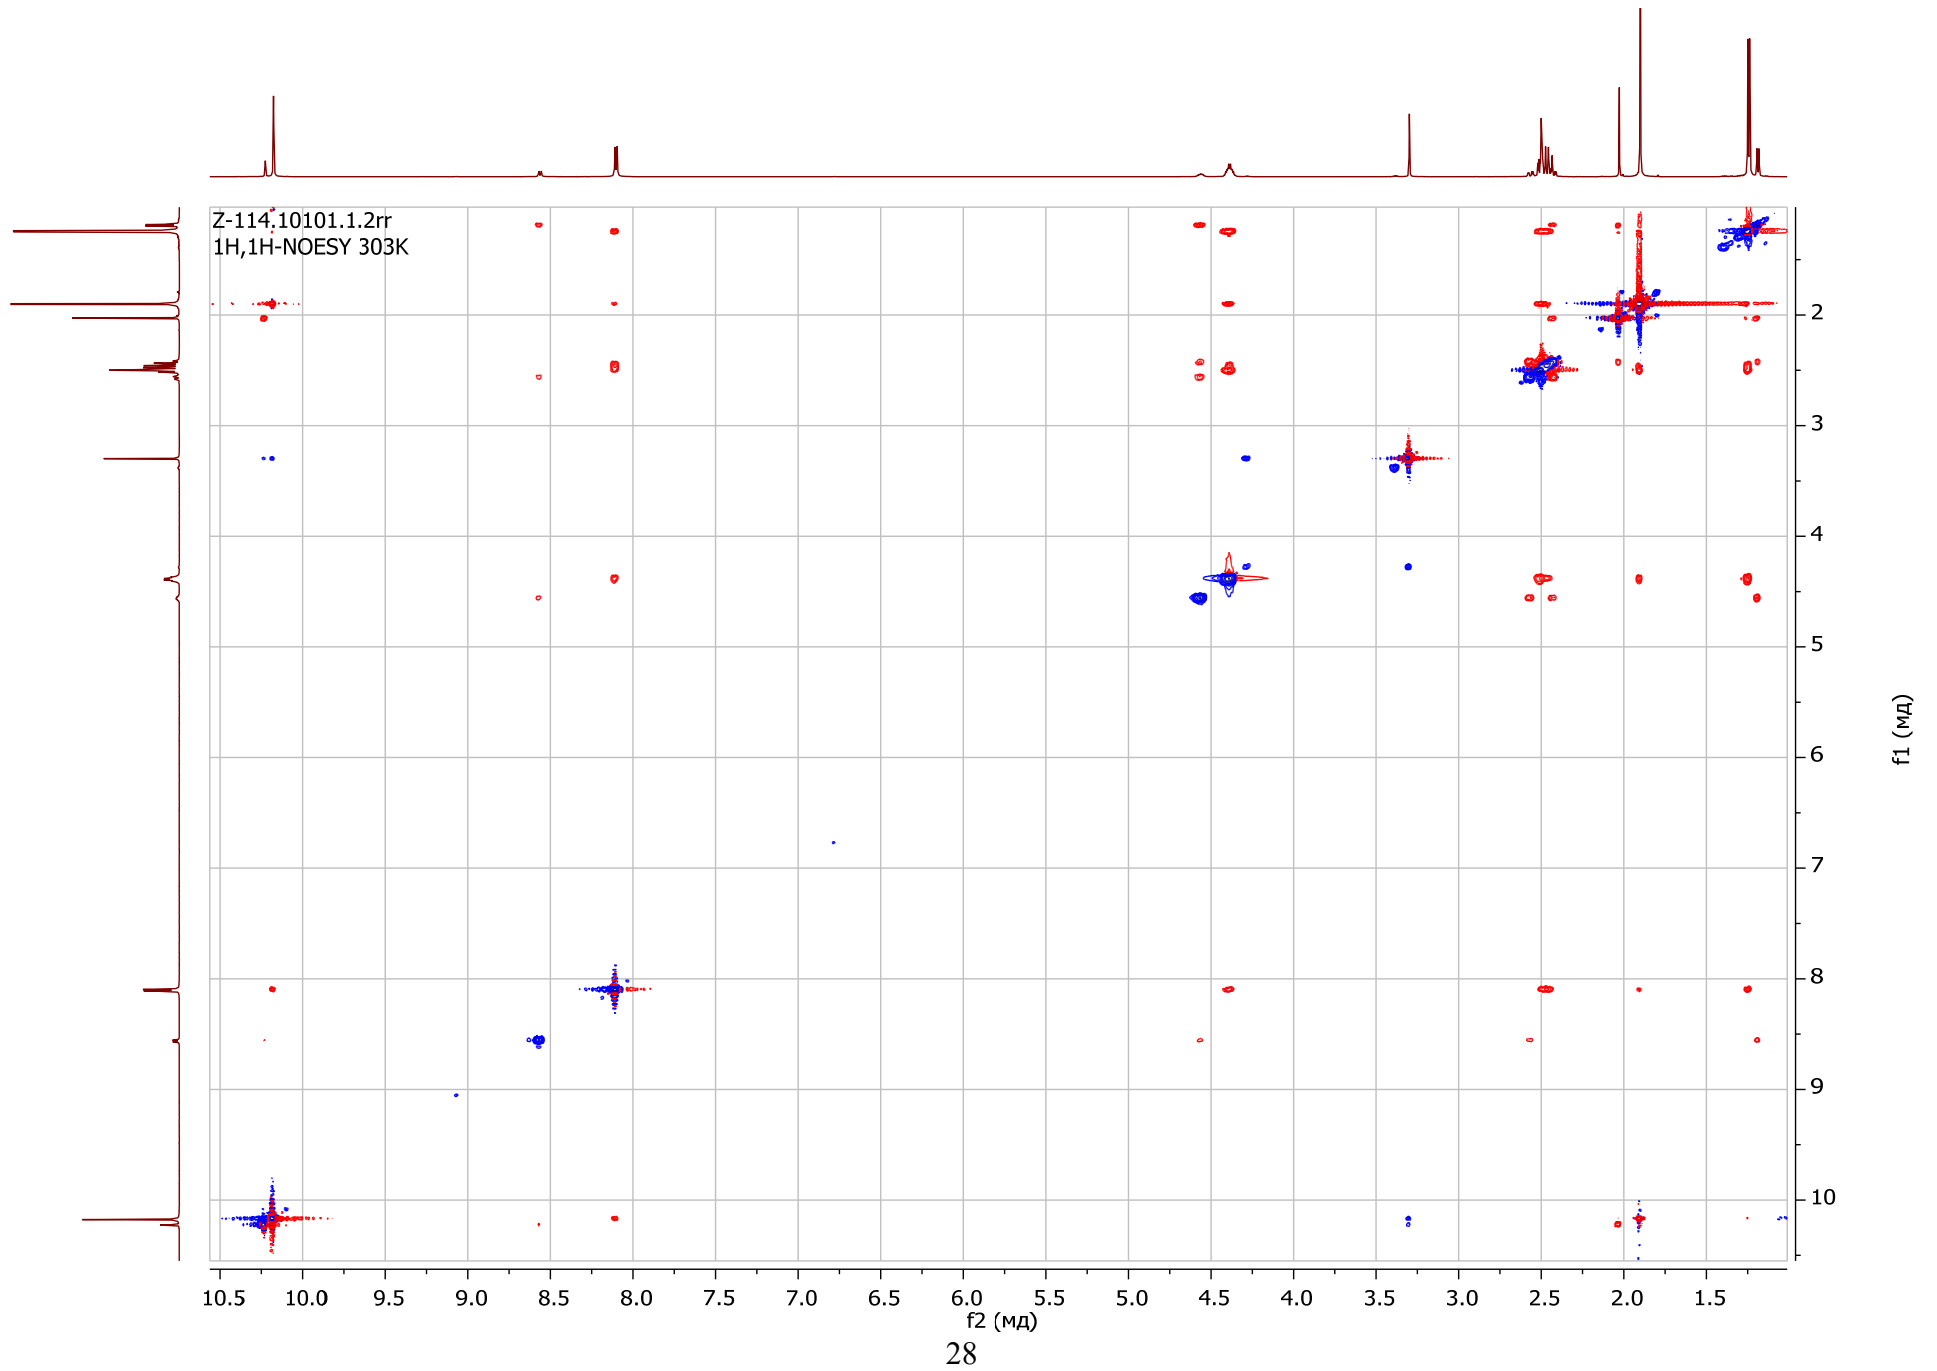

Fragment of  $^1\text{H}, ^1\text{H}$  NOESY spectrum of 14-membered cyclic bis-thiosemicarbazone **6** (600.13 MHz,  $\text{DMSO-}d_6$ )

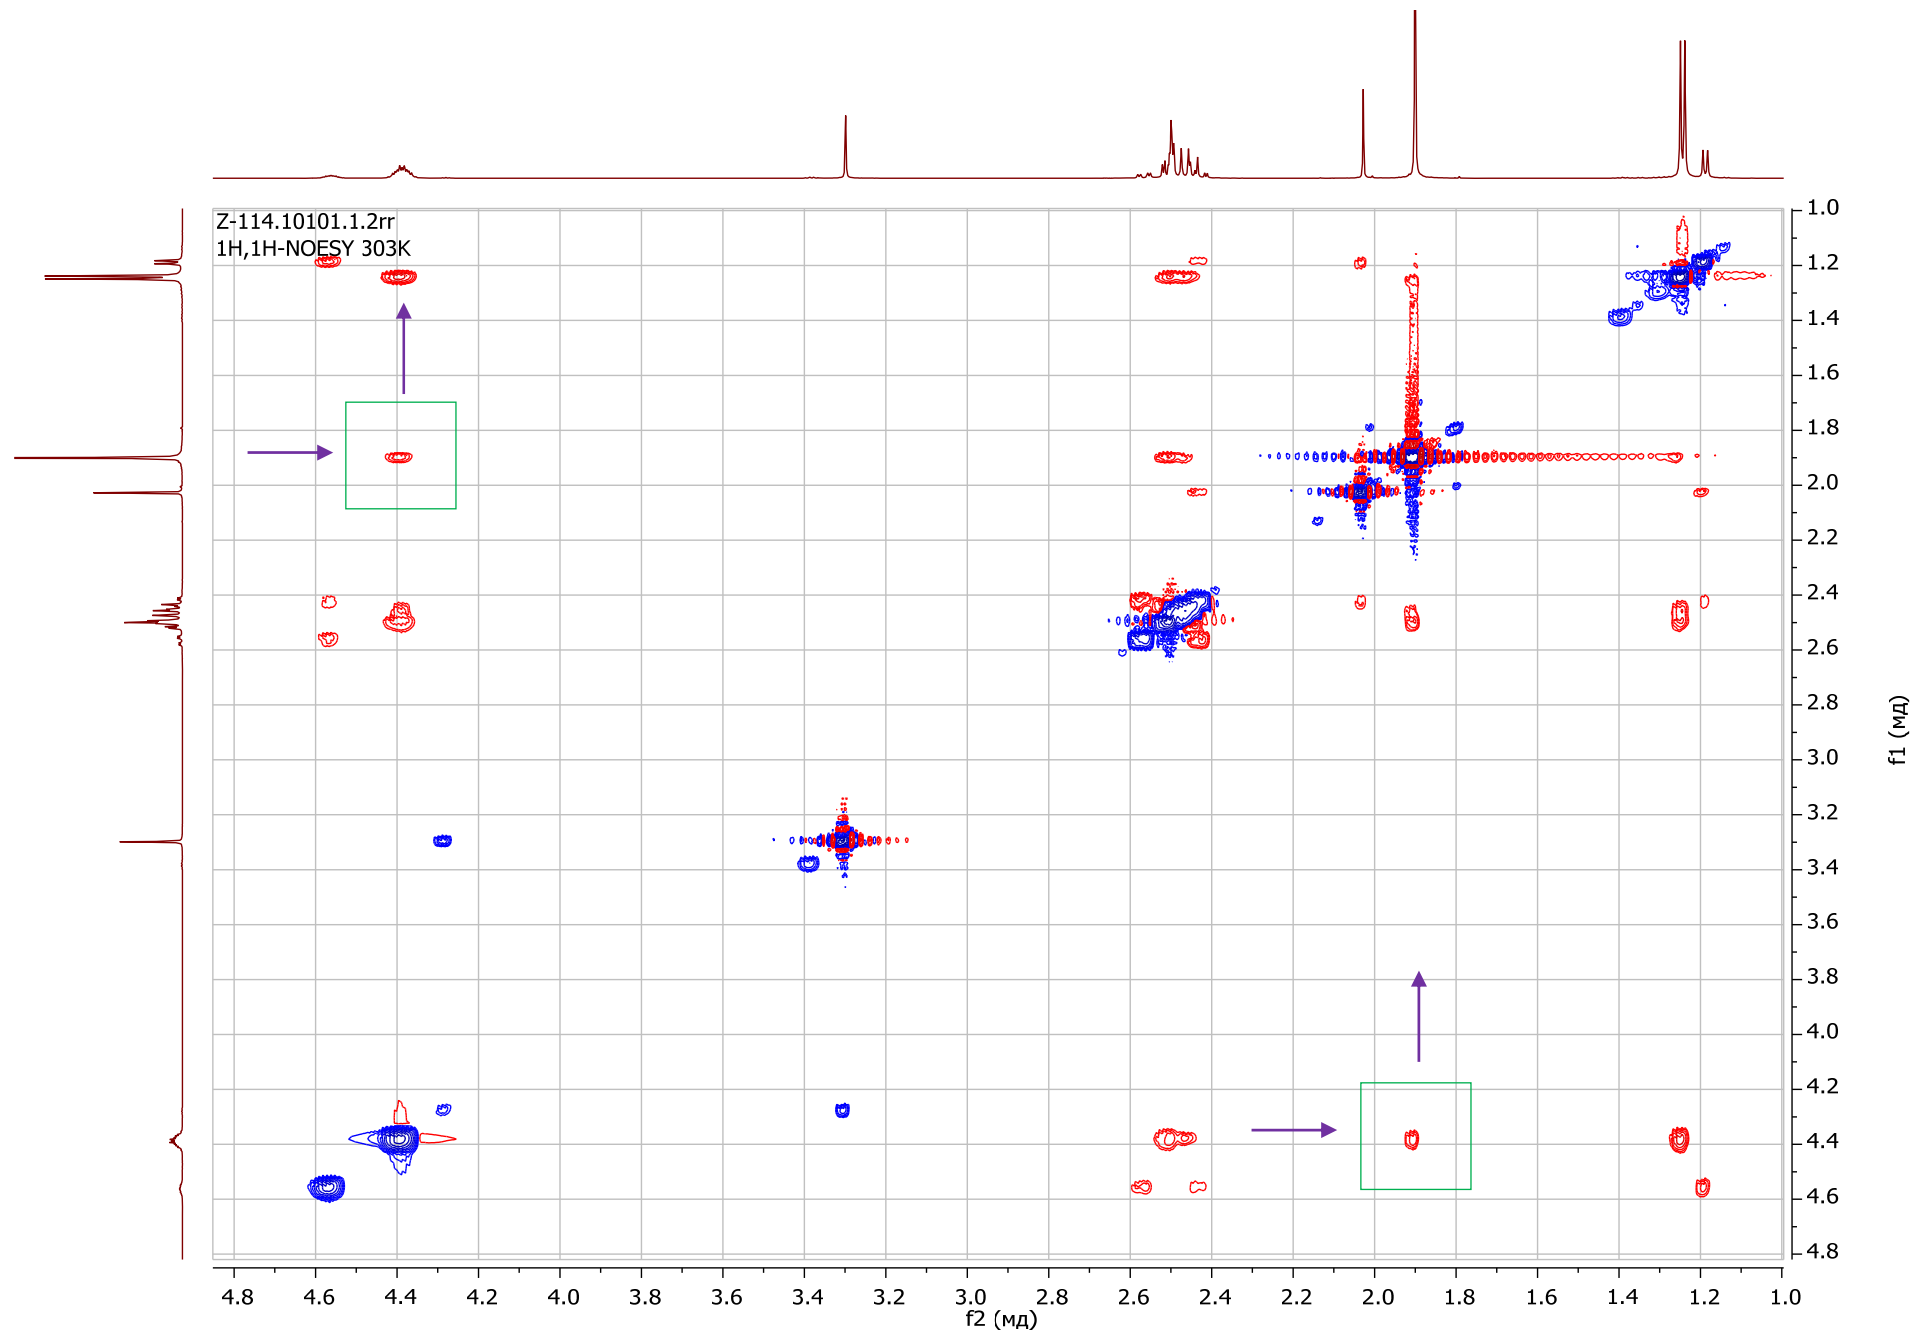

Mass-spectrum of 14-membered cyclic bis-thiosemicarbazone **6** (electron impact, 70 eV)

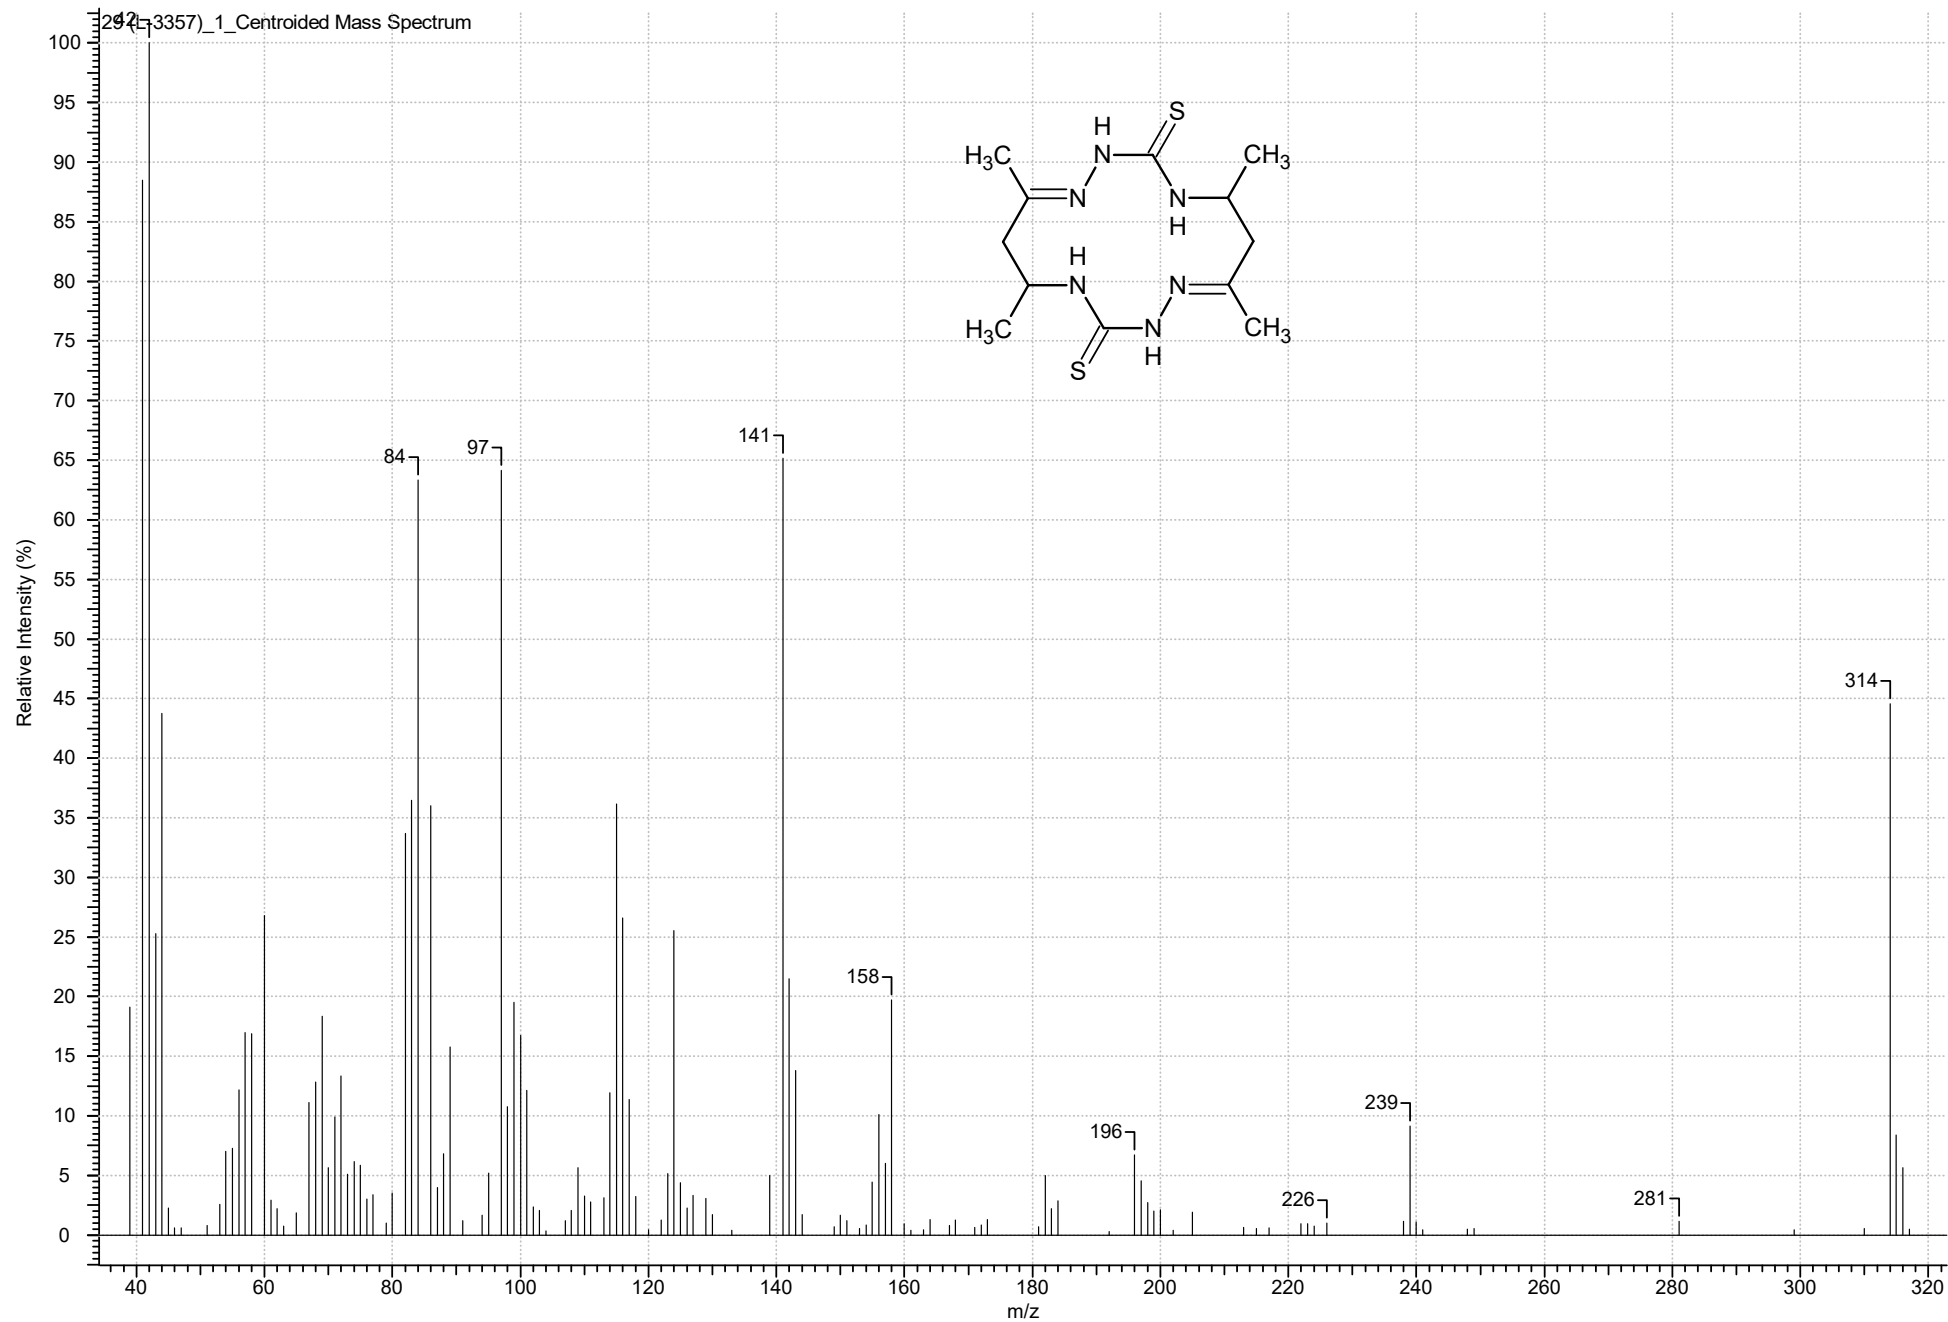

<sup>1</sup>H NMR spectrum of 21-membered cyclic tris-thiosemicarbazone **7** after crystallization from DMF (600.13 MHz, 30 °C, DMSO-d<sub>6</sub>)

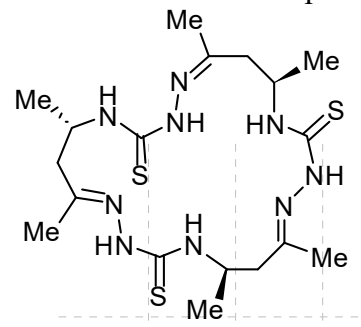

a solvate with DMF

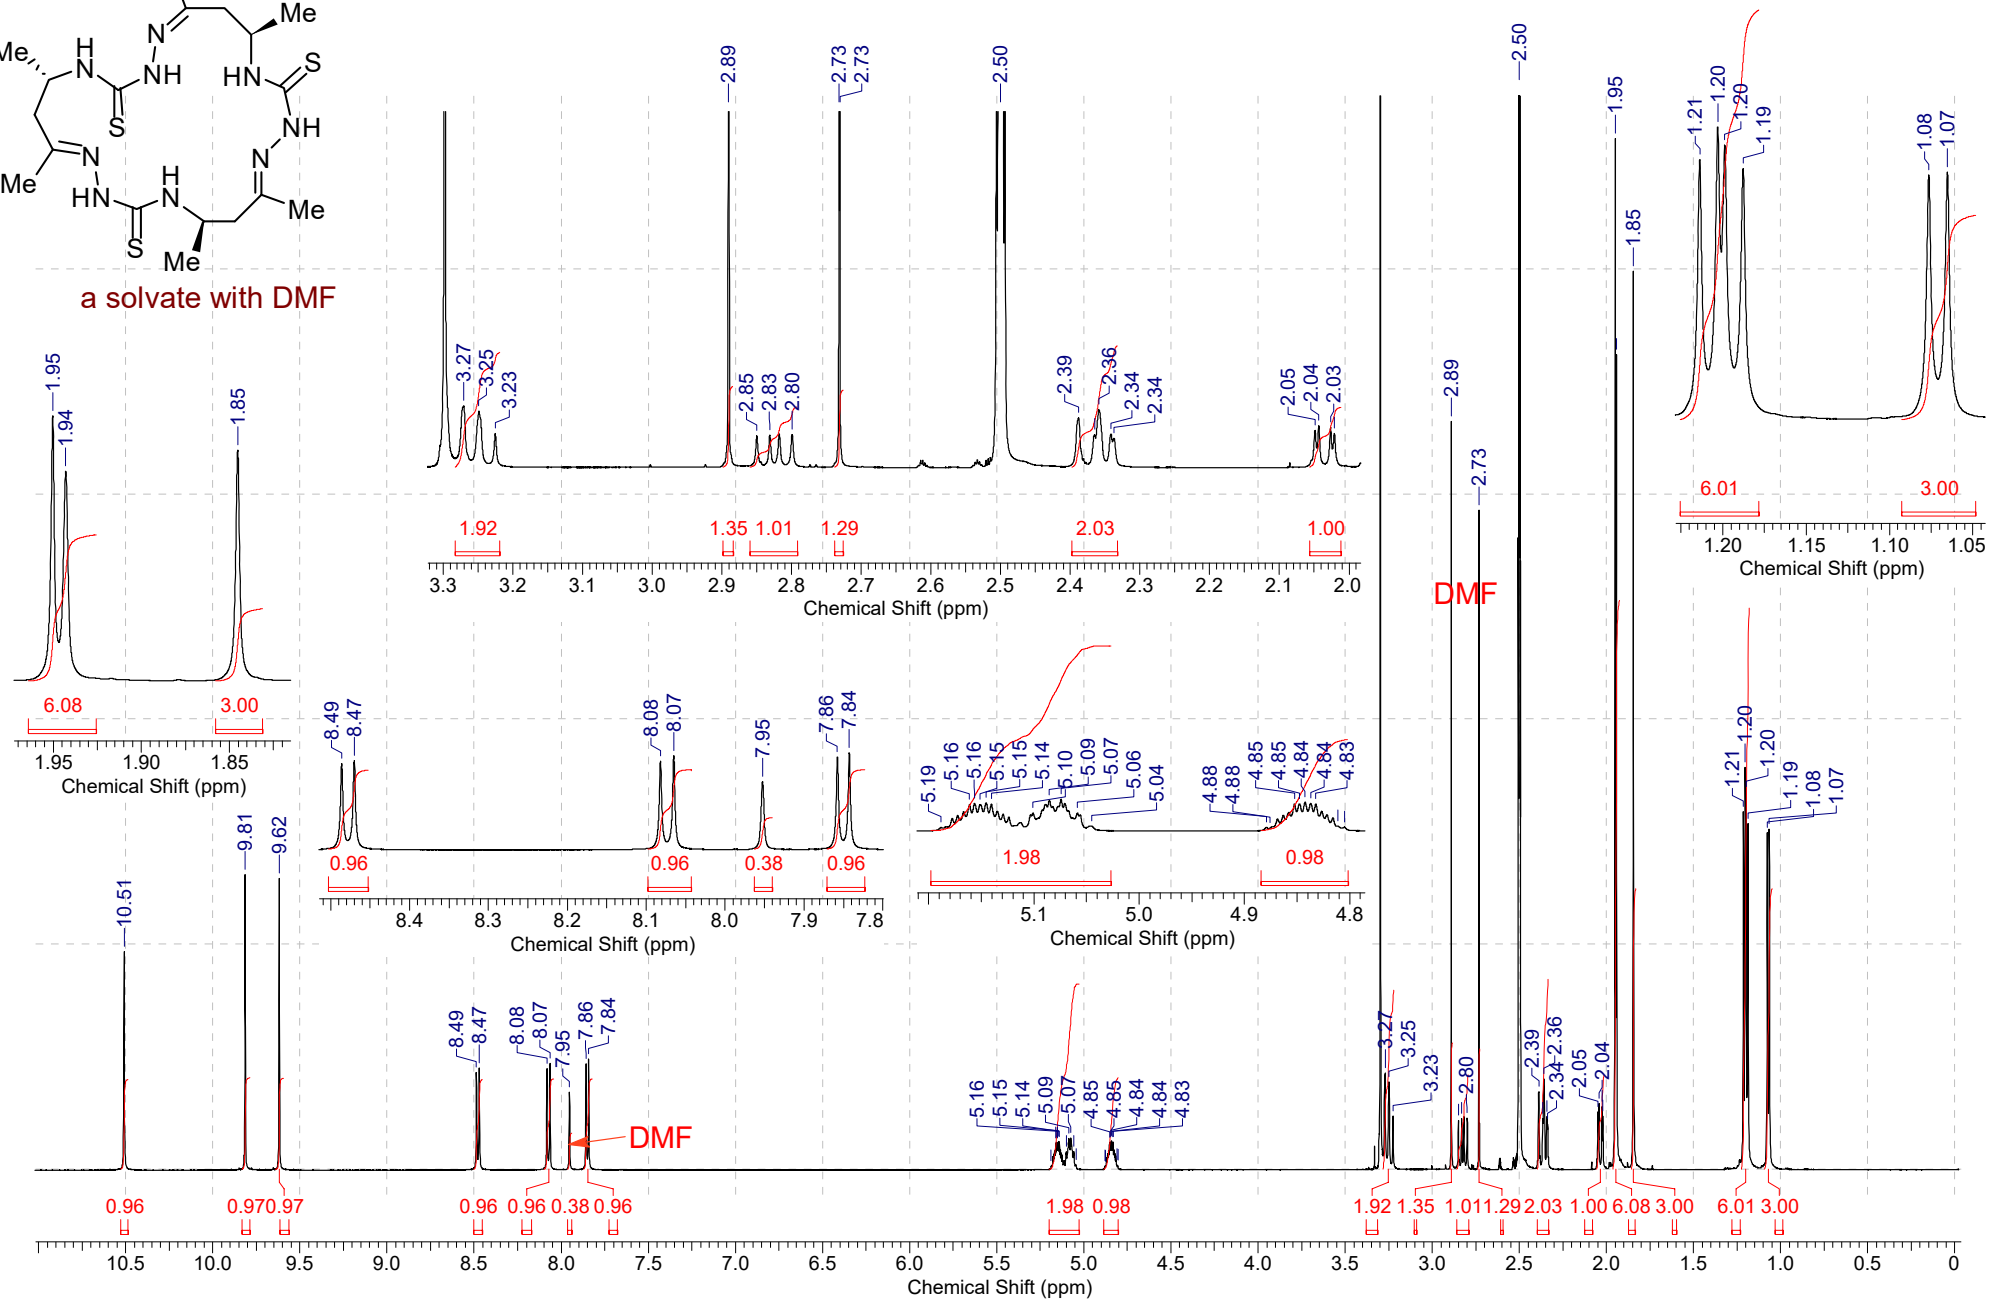







$^1\text{H}$  NMR spectrum of 21-membered cyclic tris-thiosemicarbazone **7** after crystallization from DMF (600.13 MHz, 90 °C,  $\text{DMSO-}d_6$ )

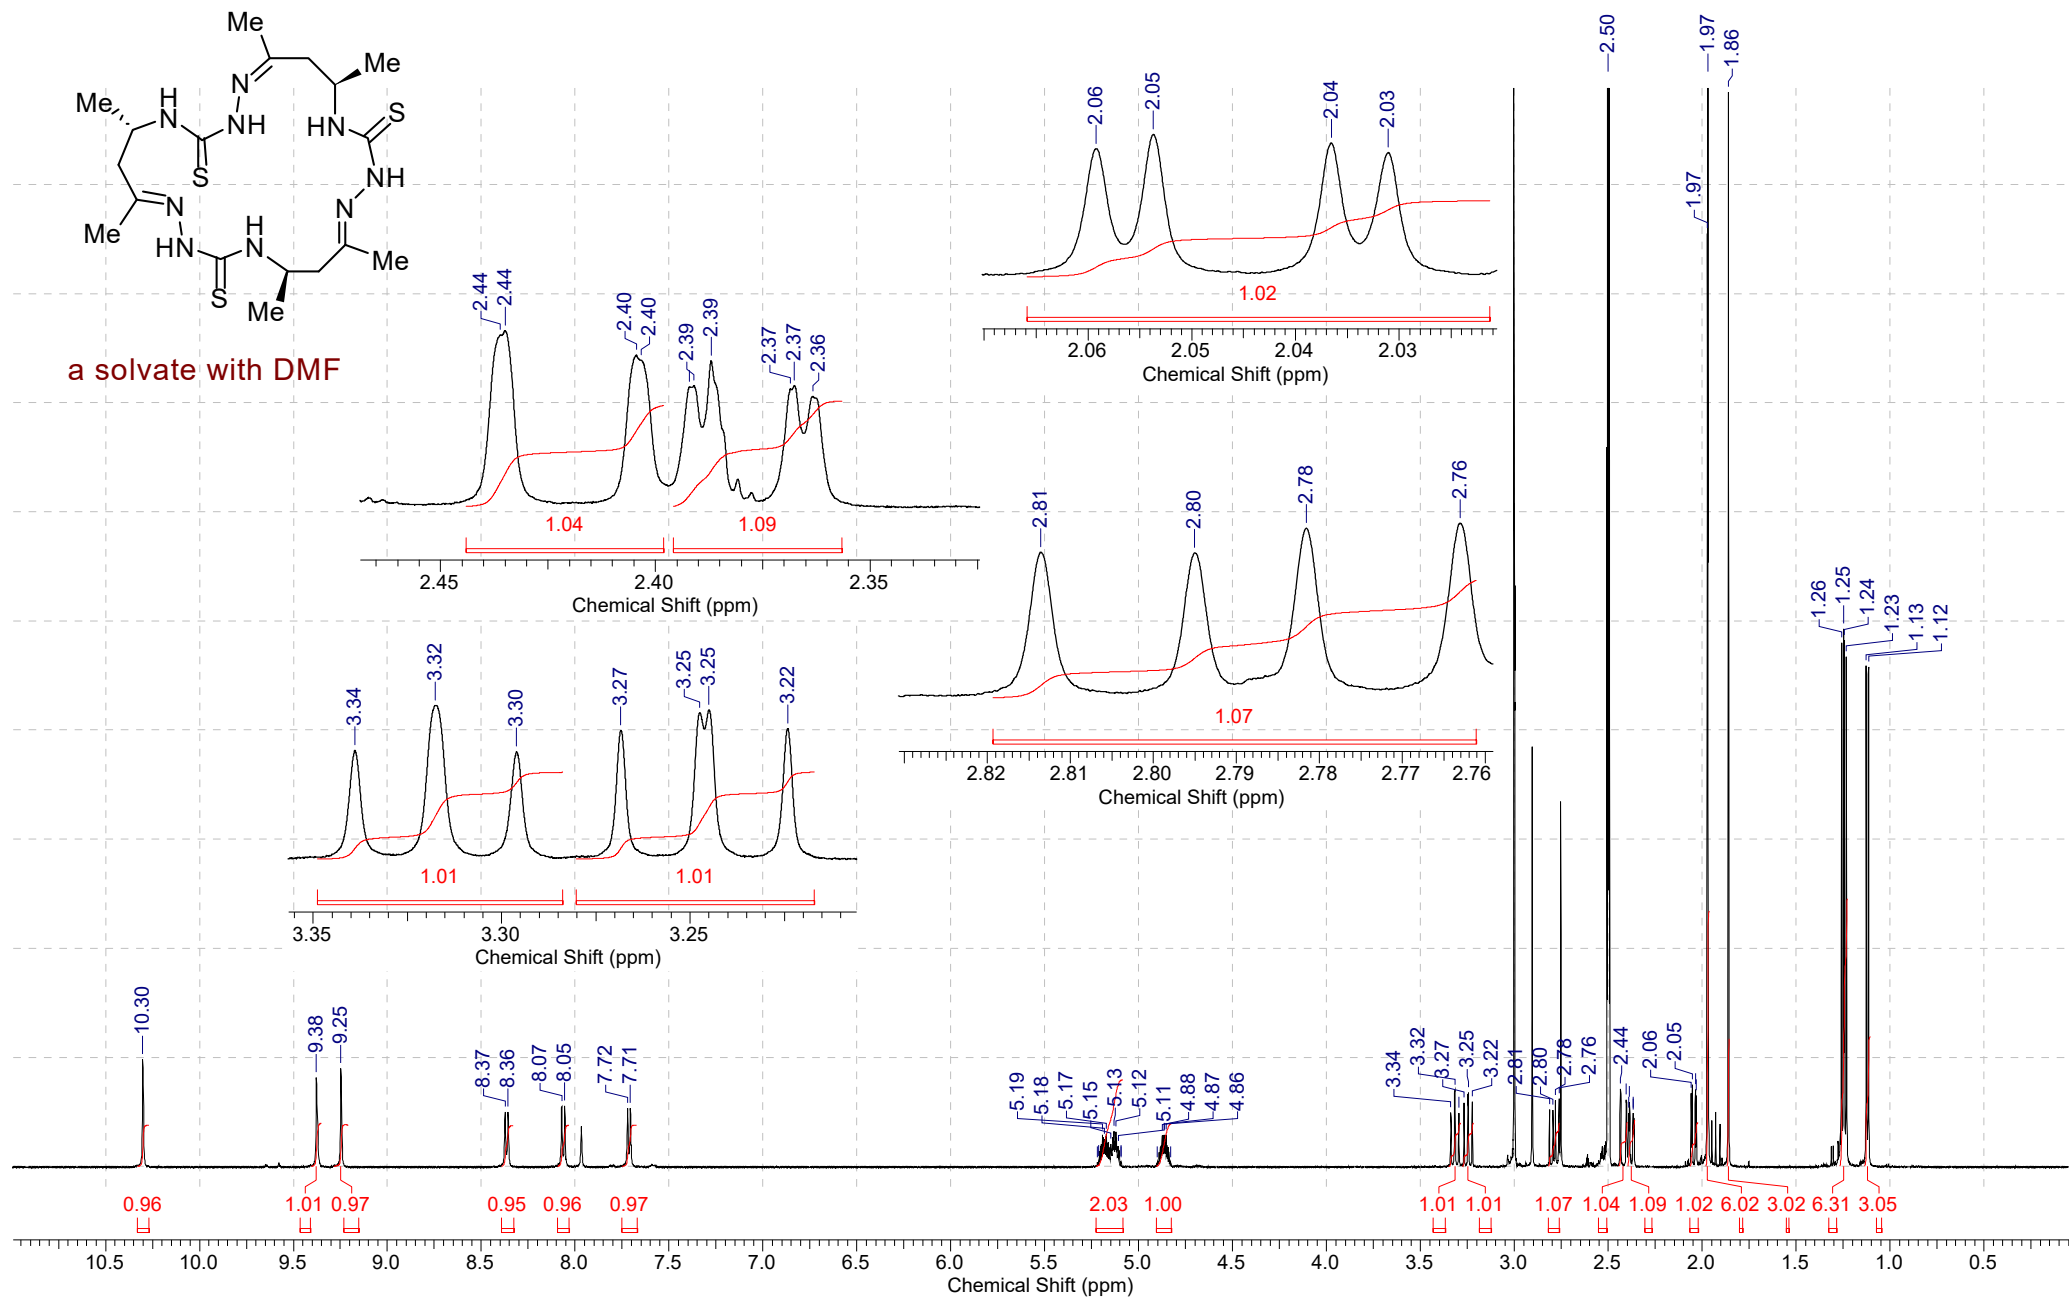

<sup>13</sup>C NMR spectrum of 21-membered cyclic tris-thiosemicarbazone **7** after crystallization from DMF (150.90 MHz, 30 °C, DMSO-*d*<sub>6</sub>)

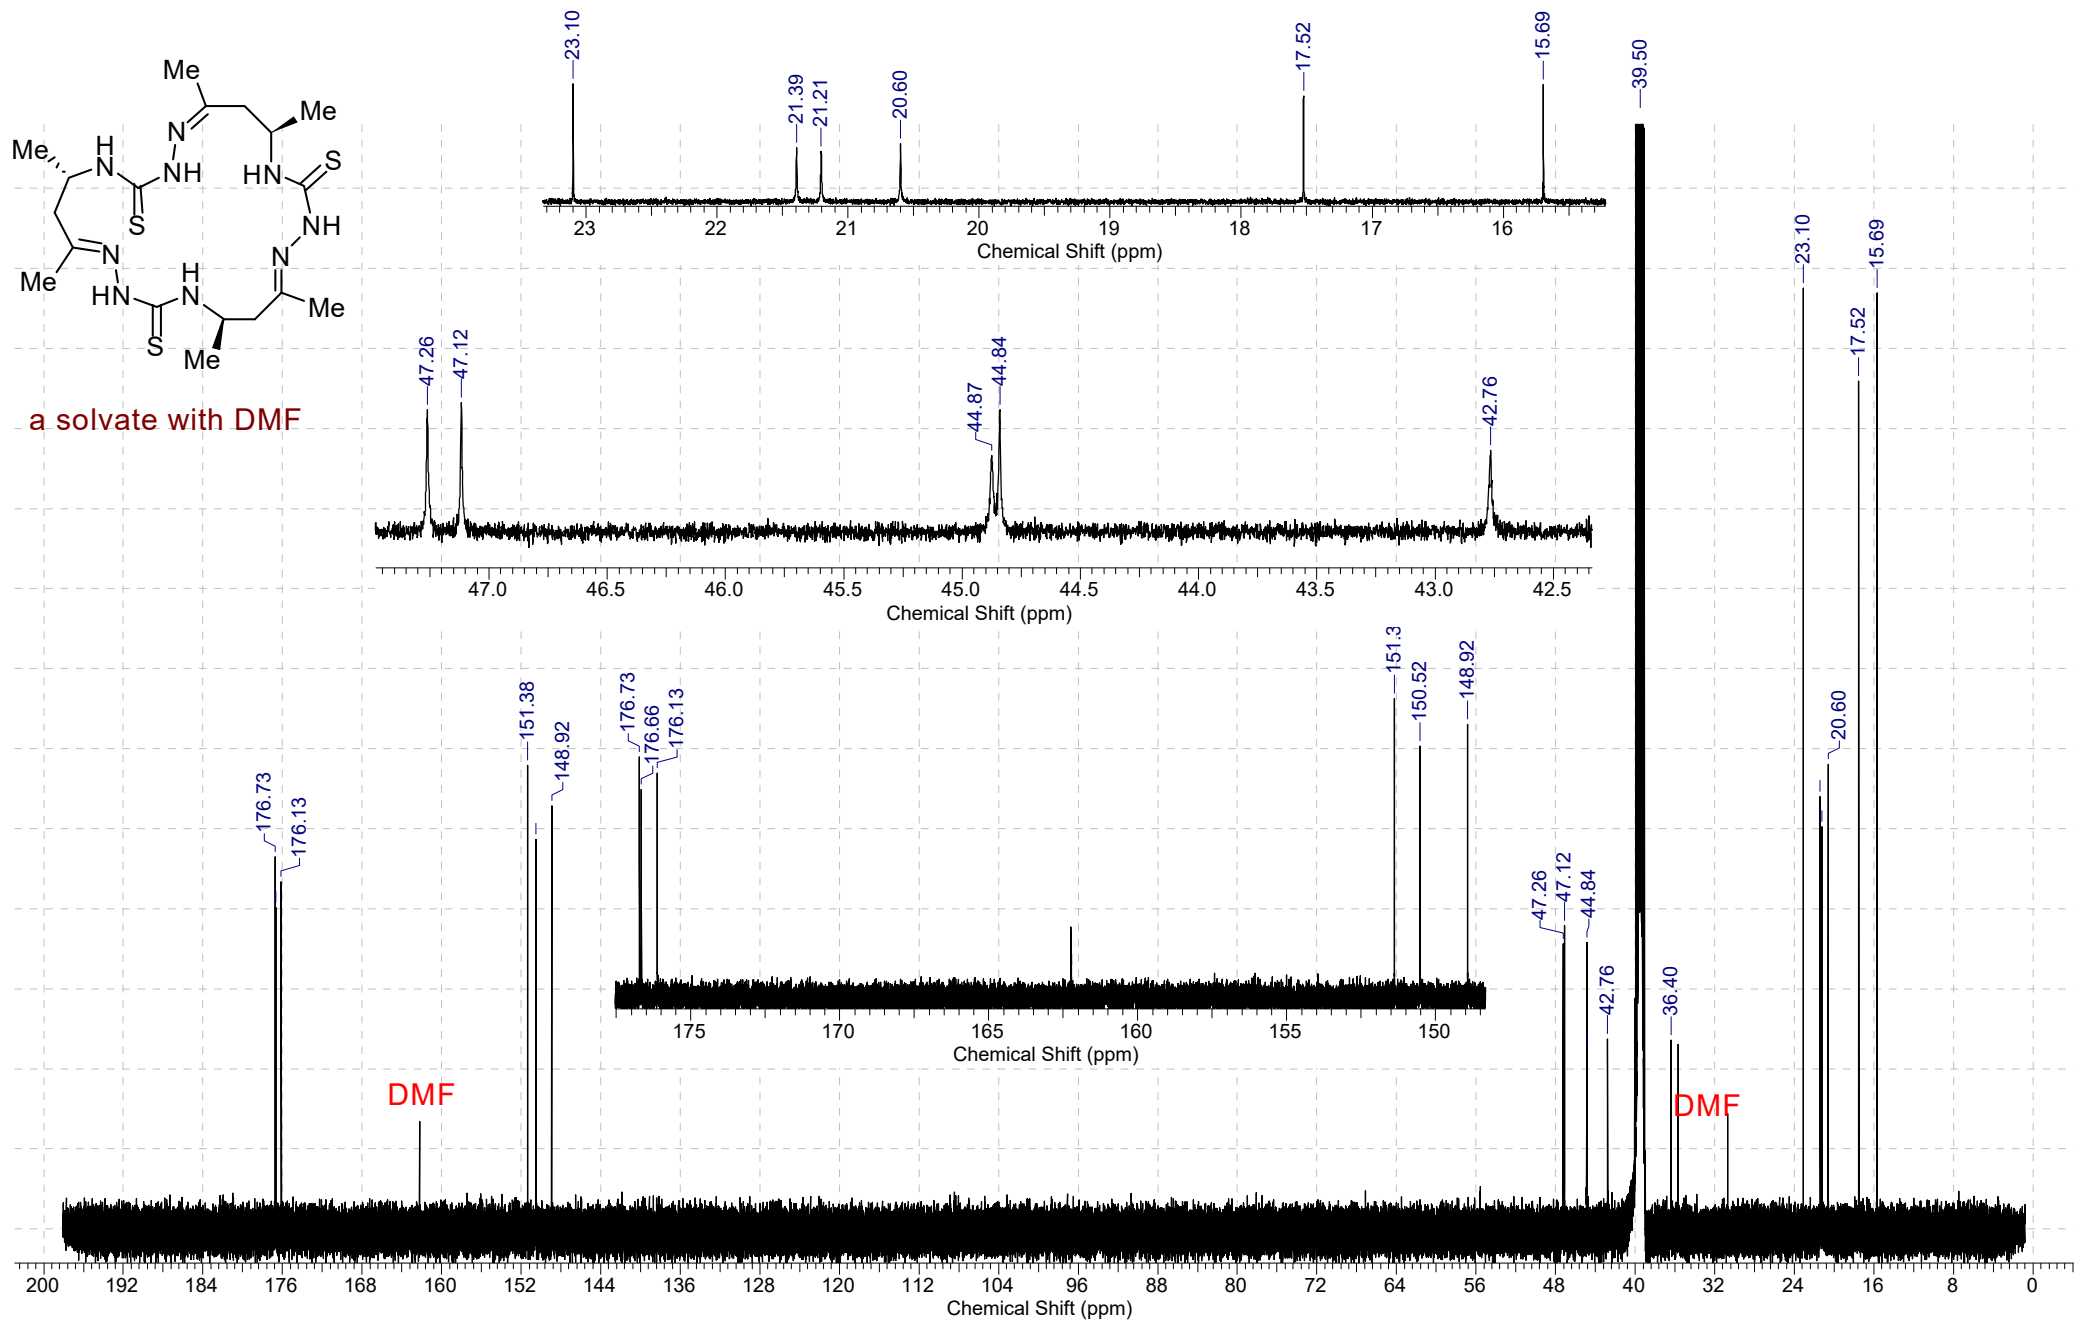

$^1\text{H}, ^1\text{H}$  COSY spectrum of 21-membered cyclic tris-thiosemicarbazone **7** after crystallization from DMF (600.13 MHz, 30 °C,  $\text{DMSO-}d_6$ )

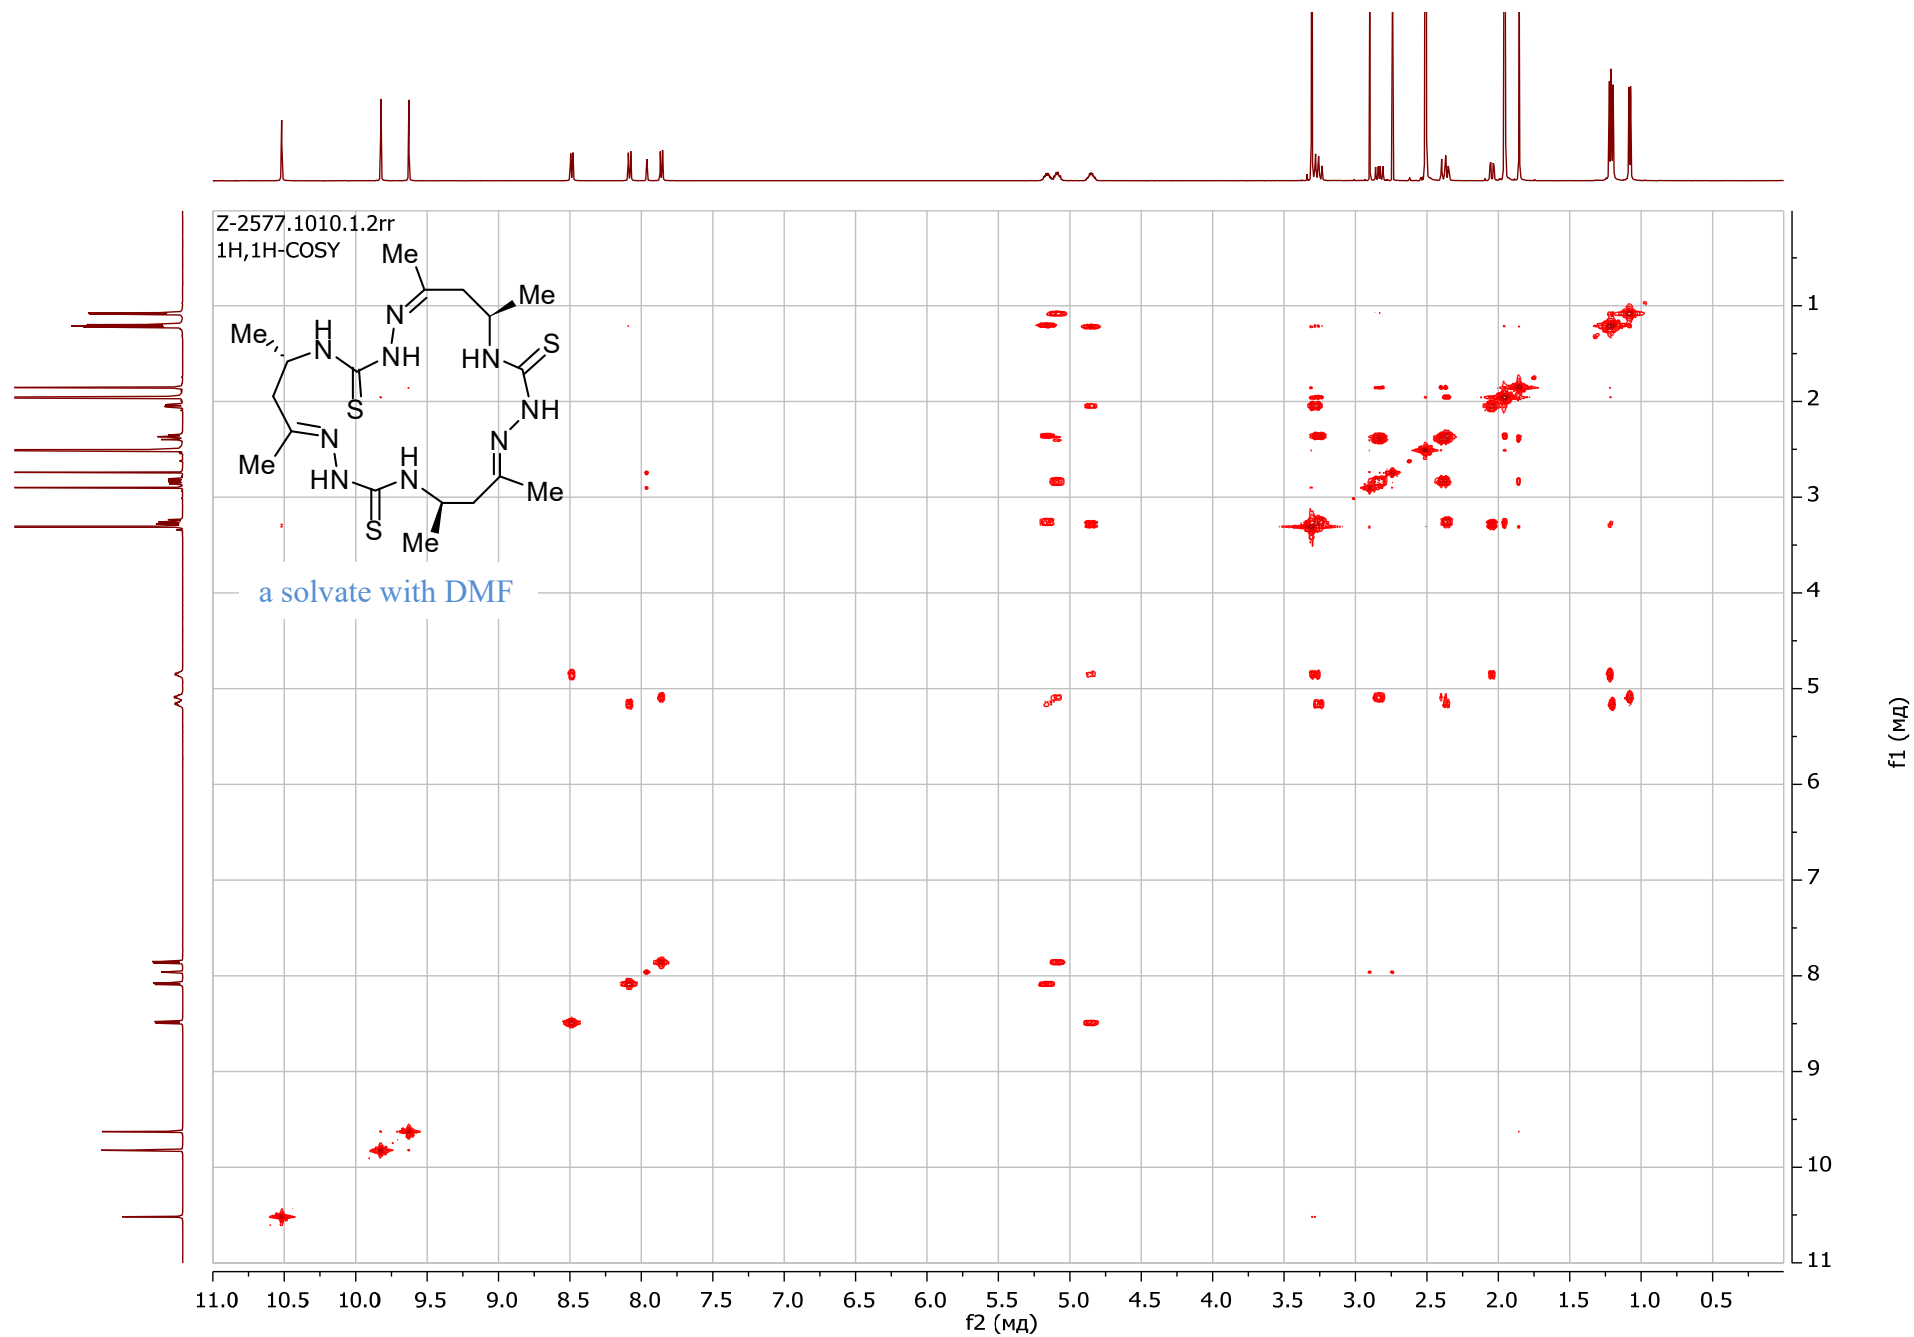

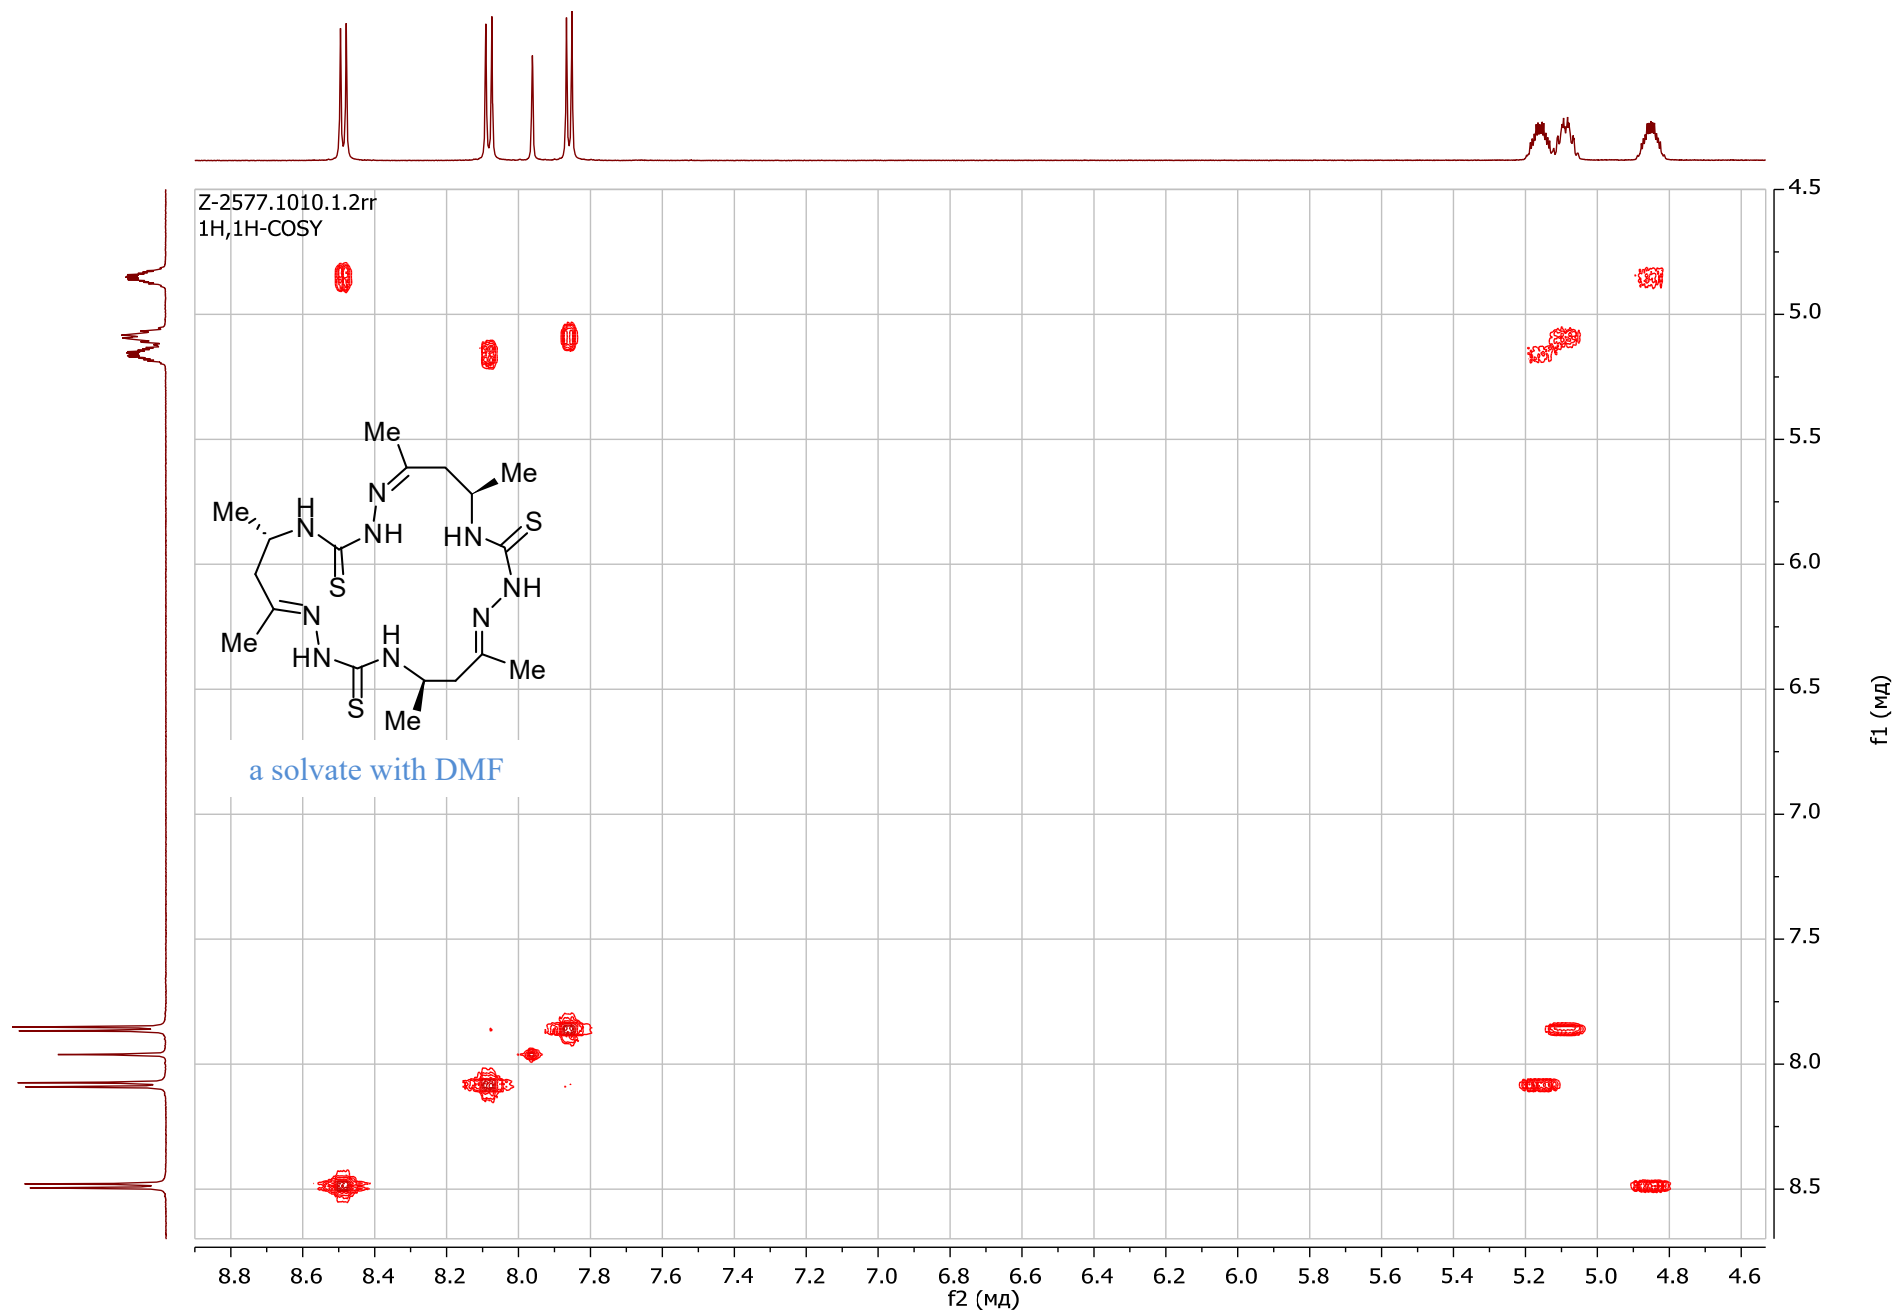

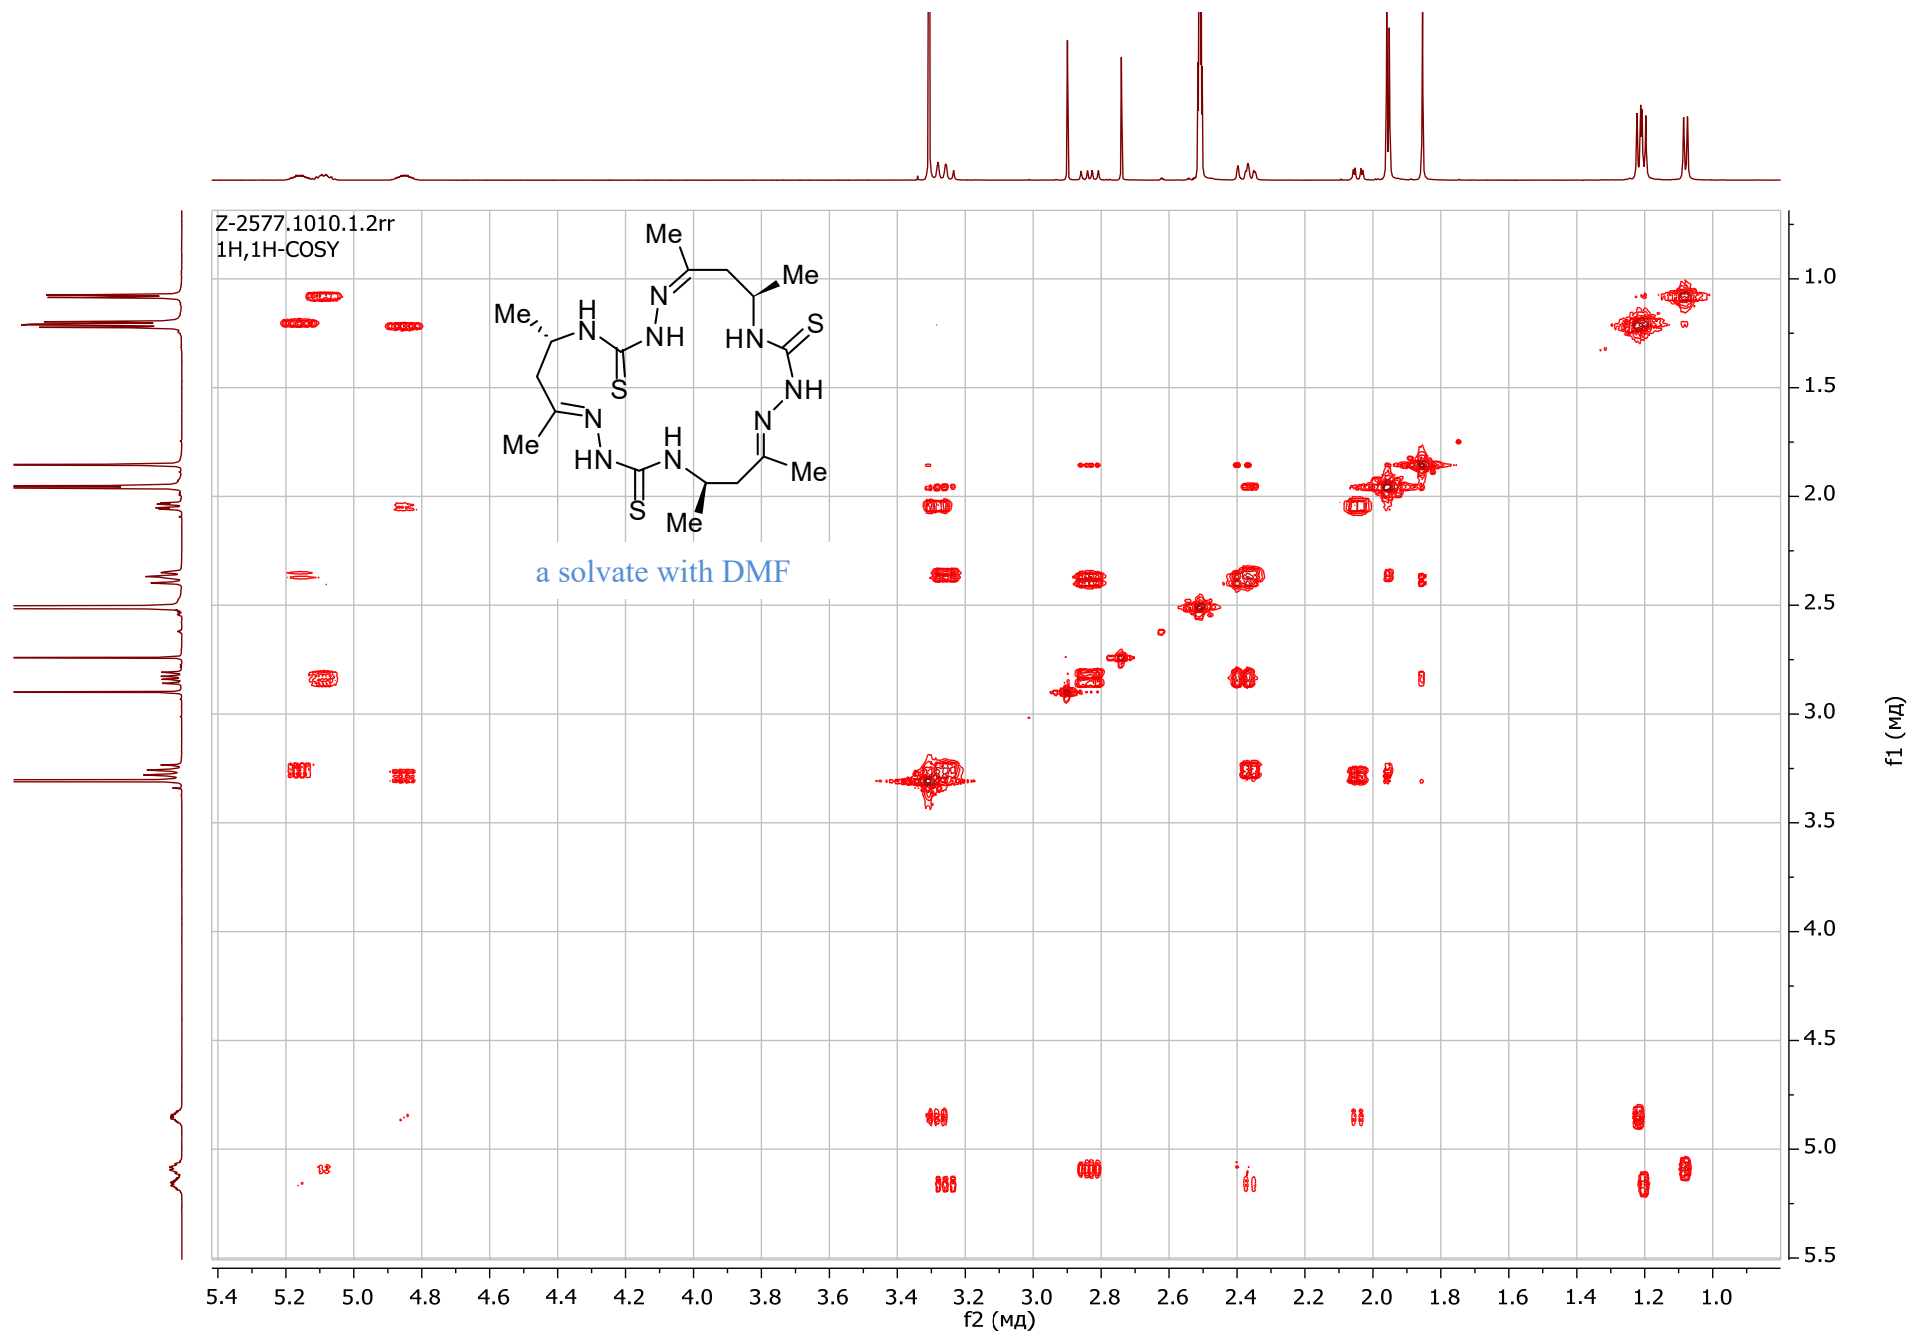

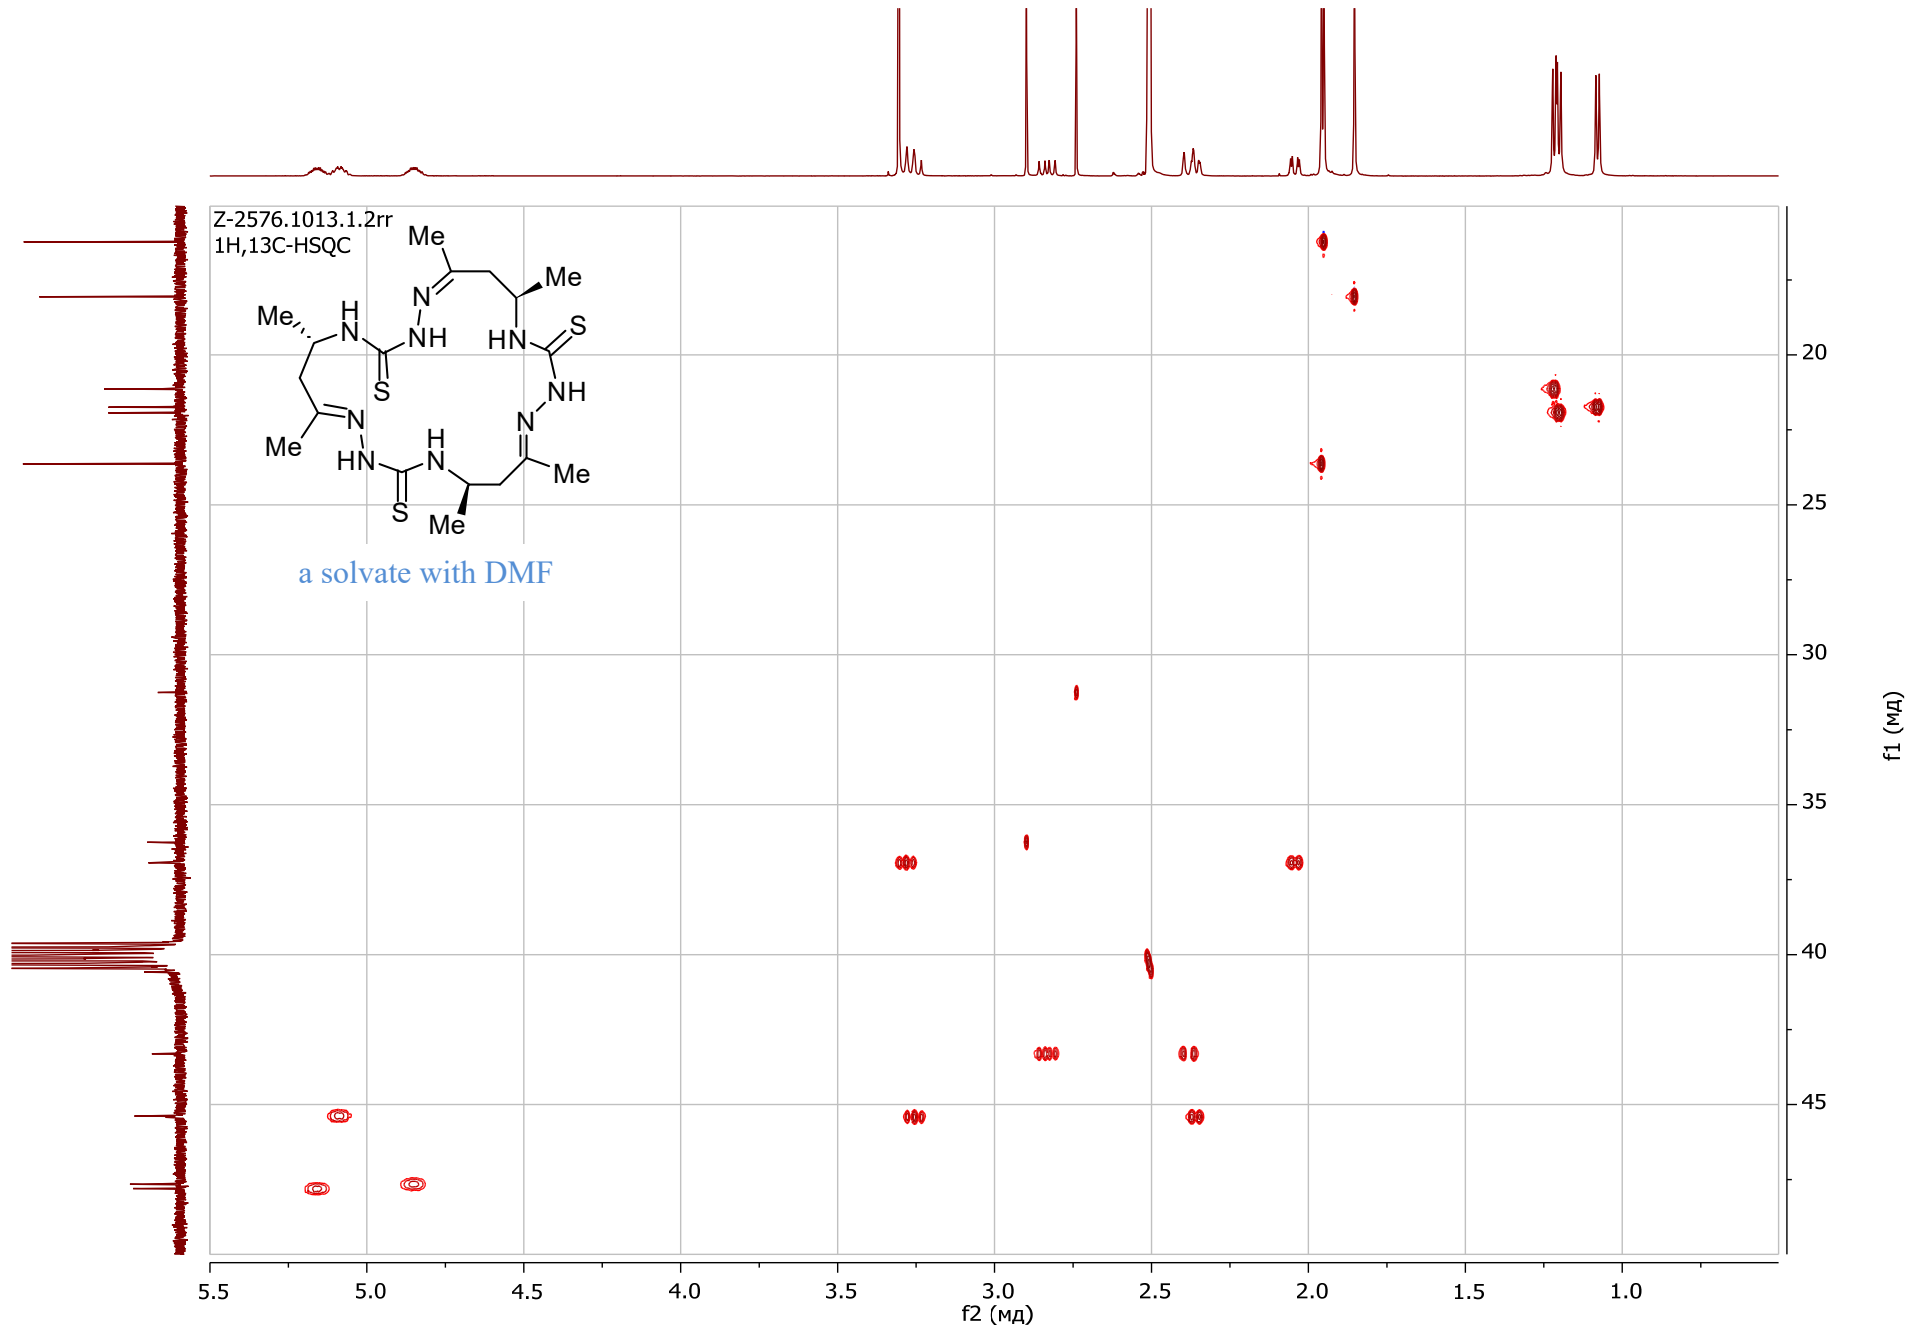

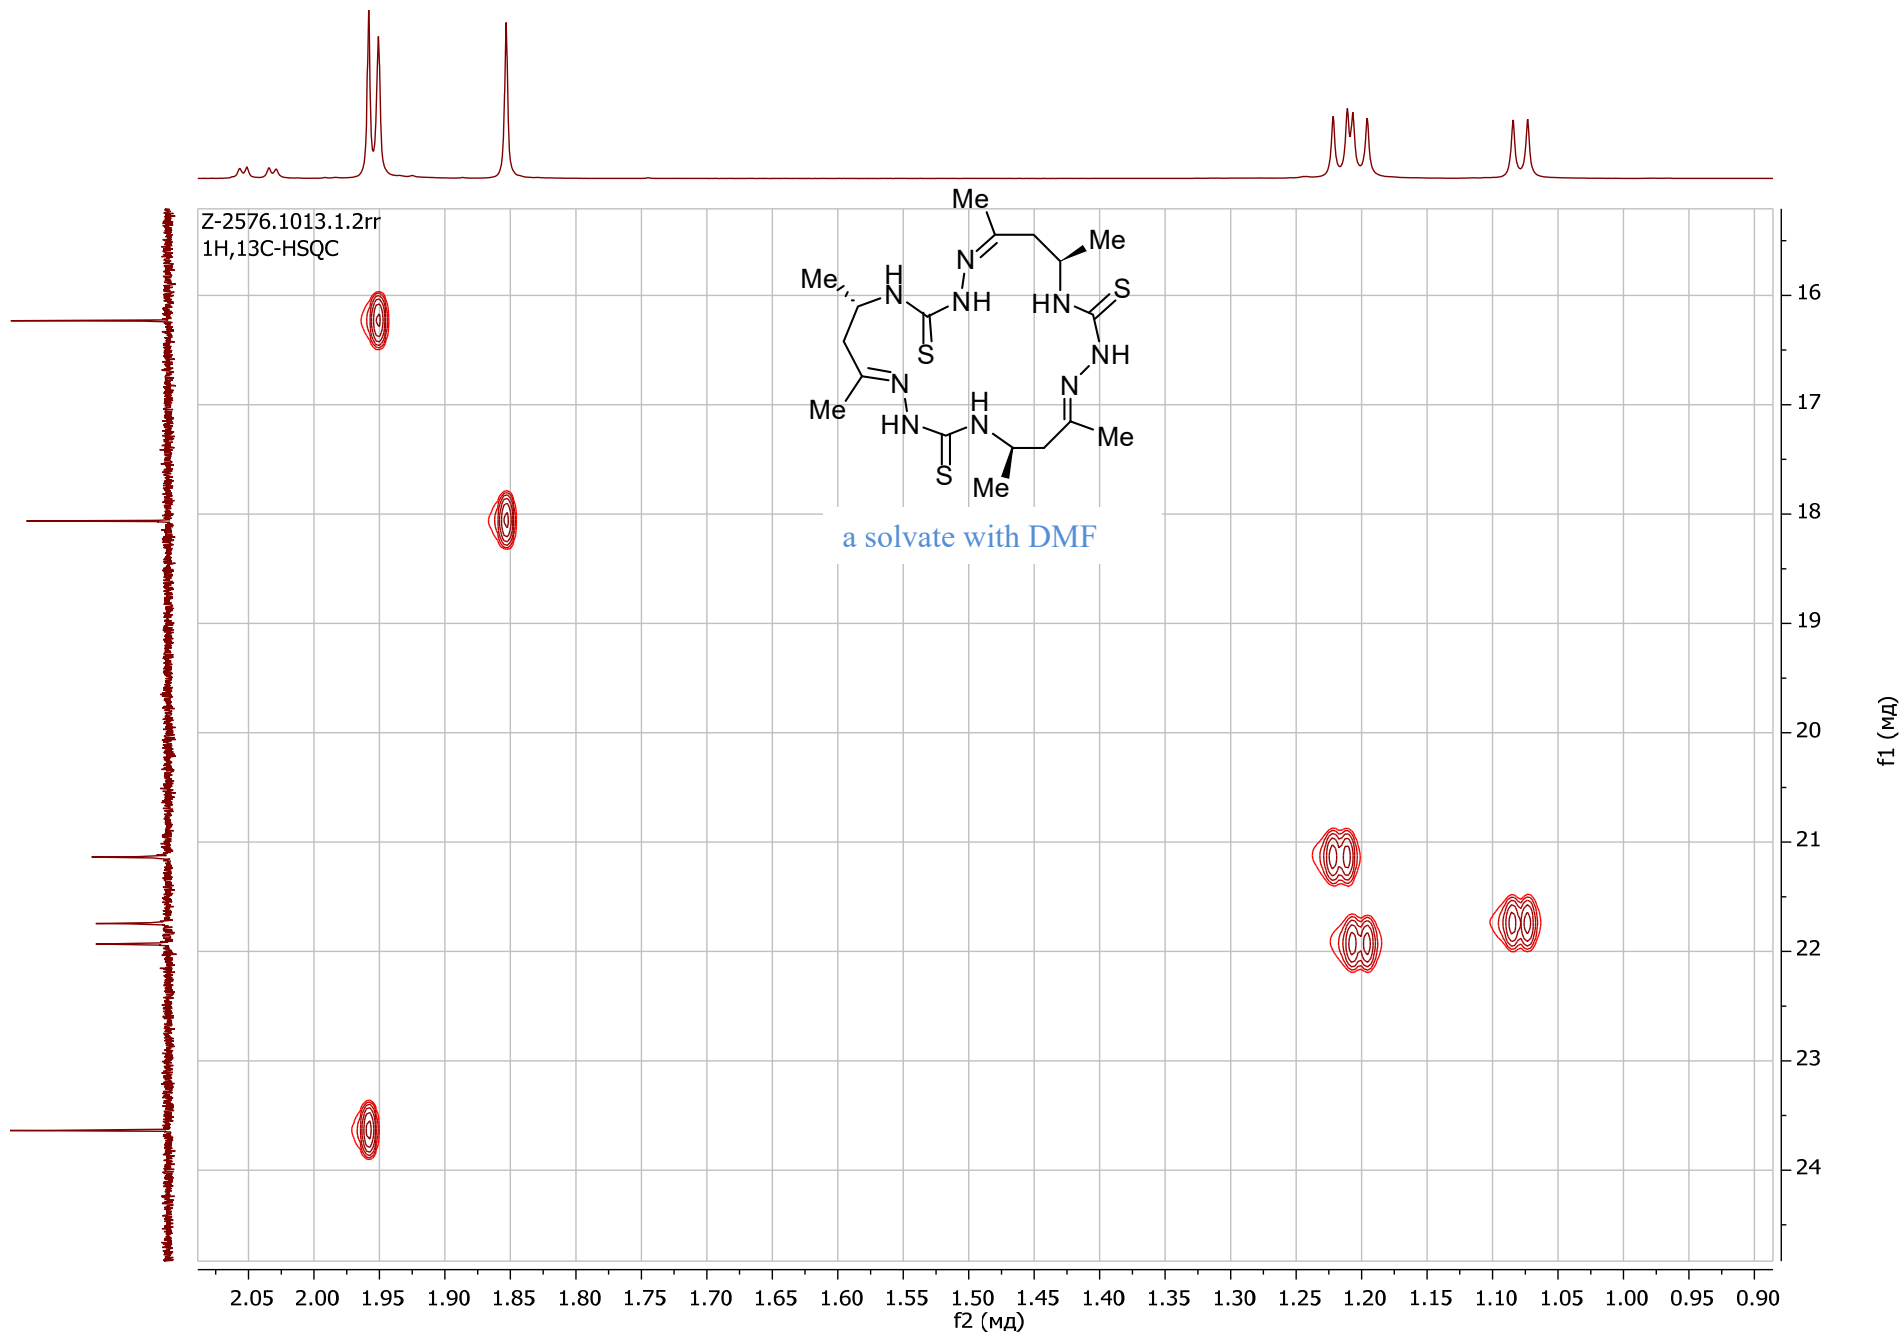



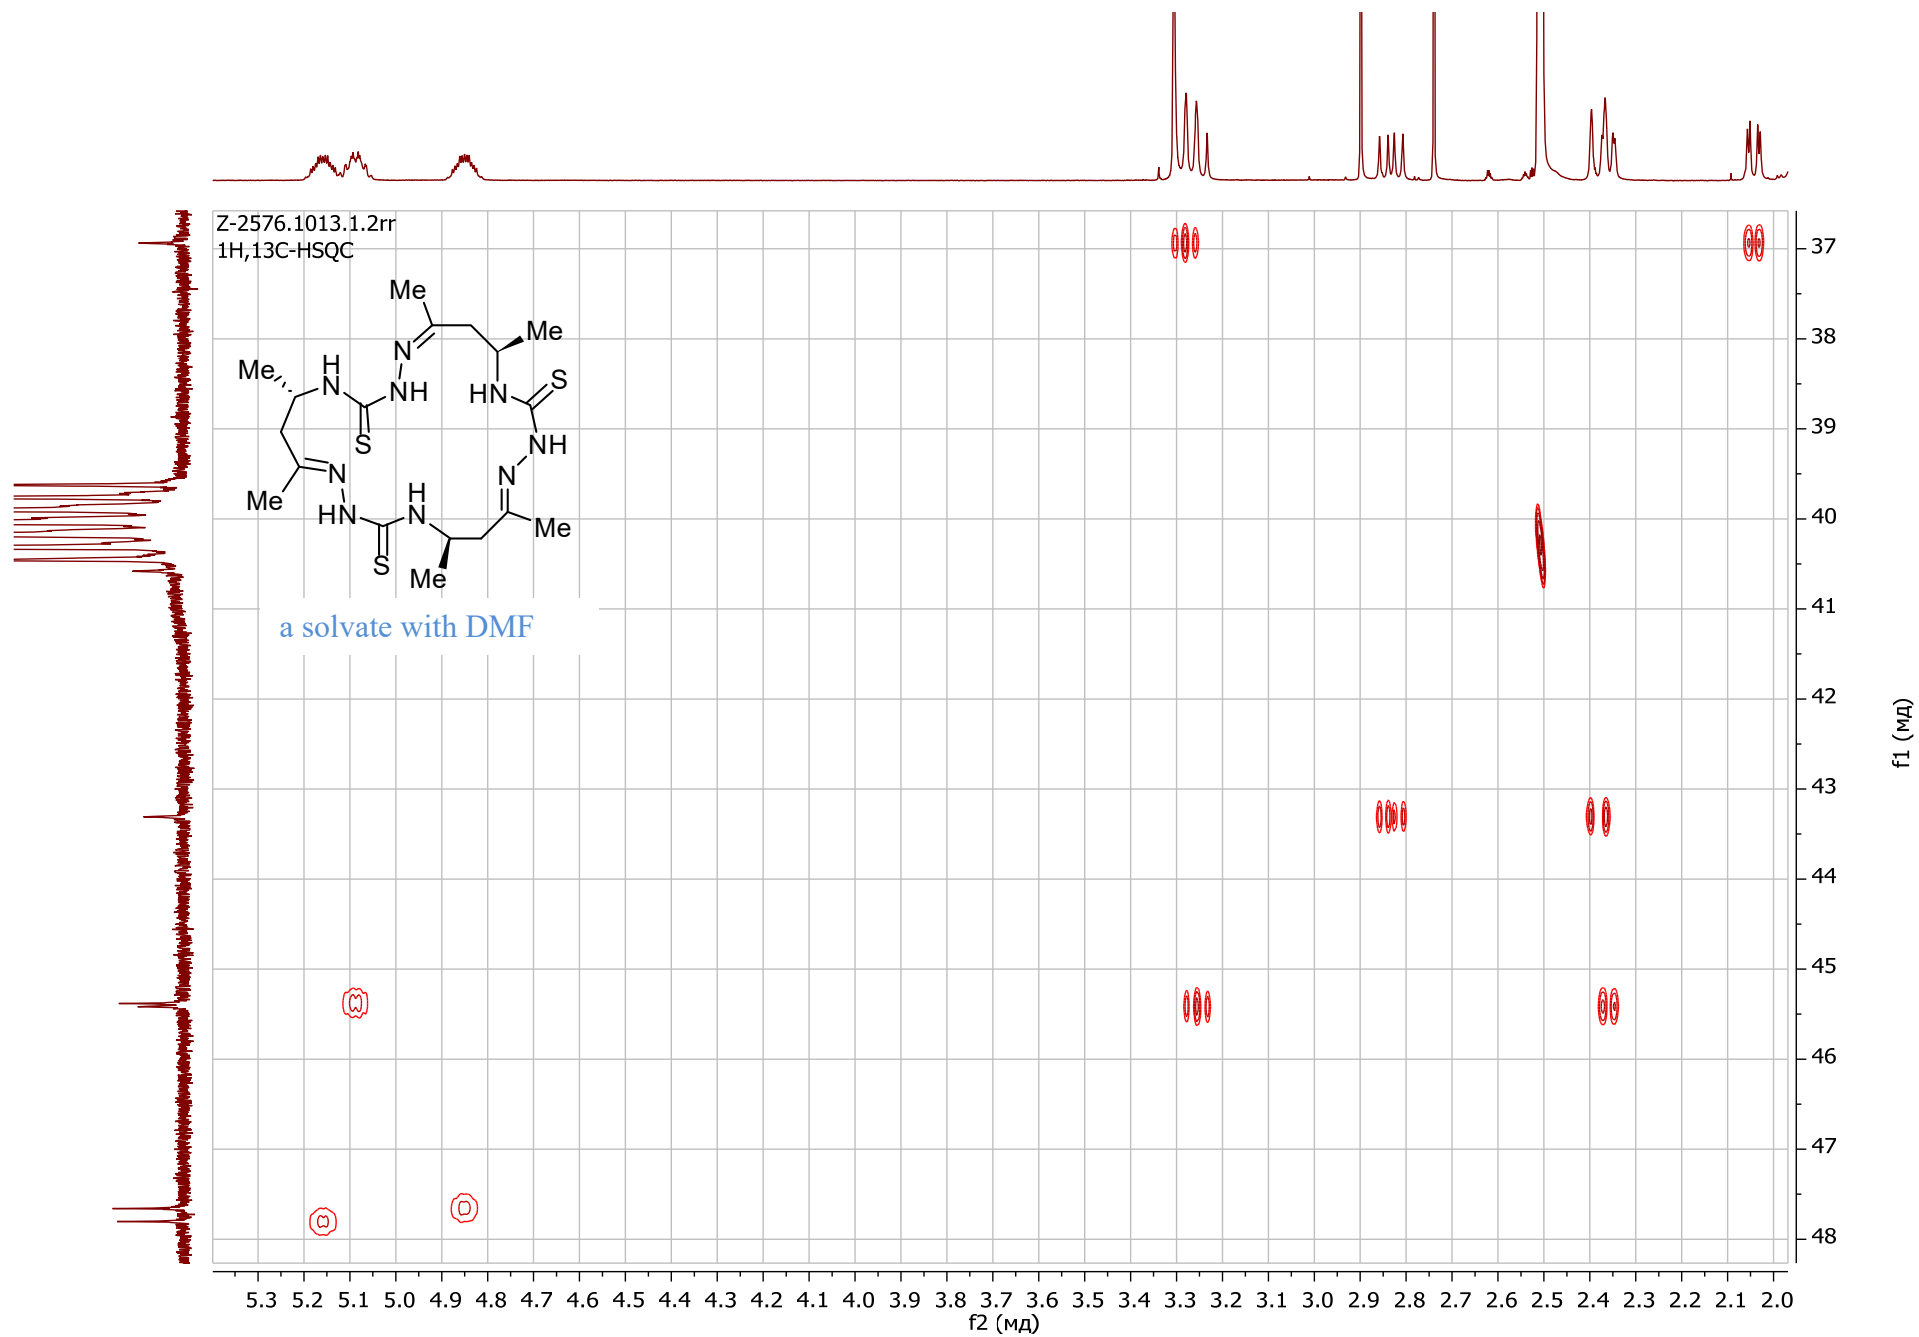

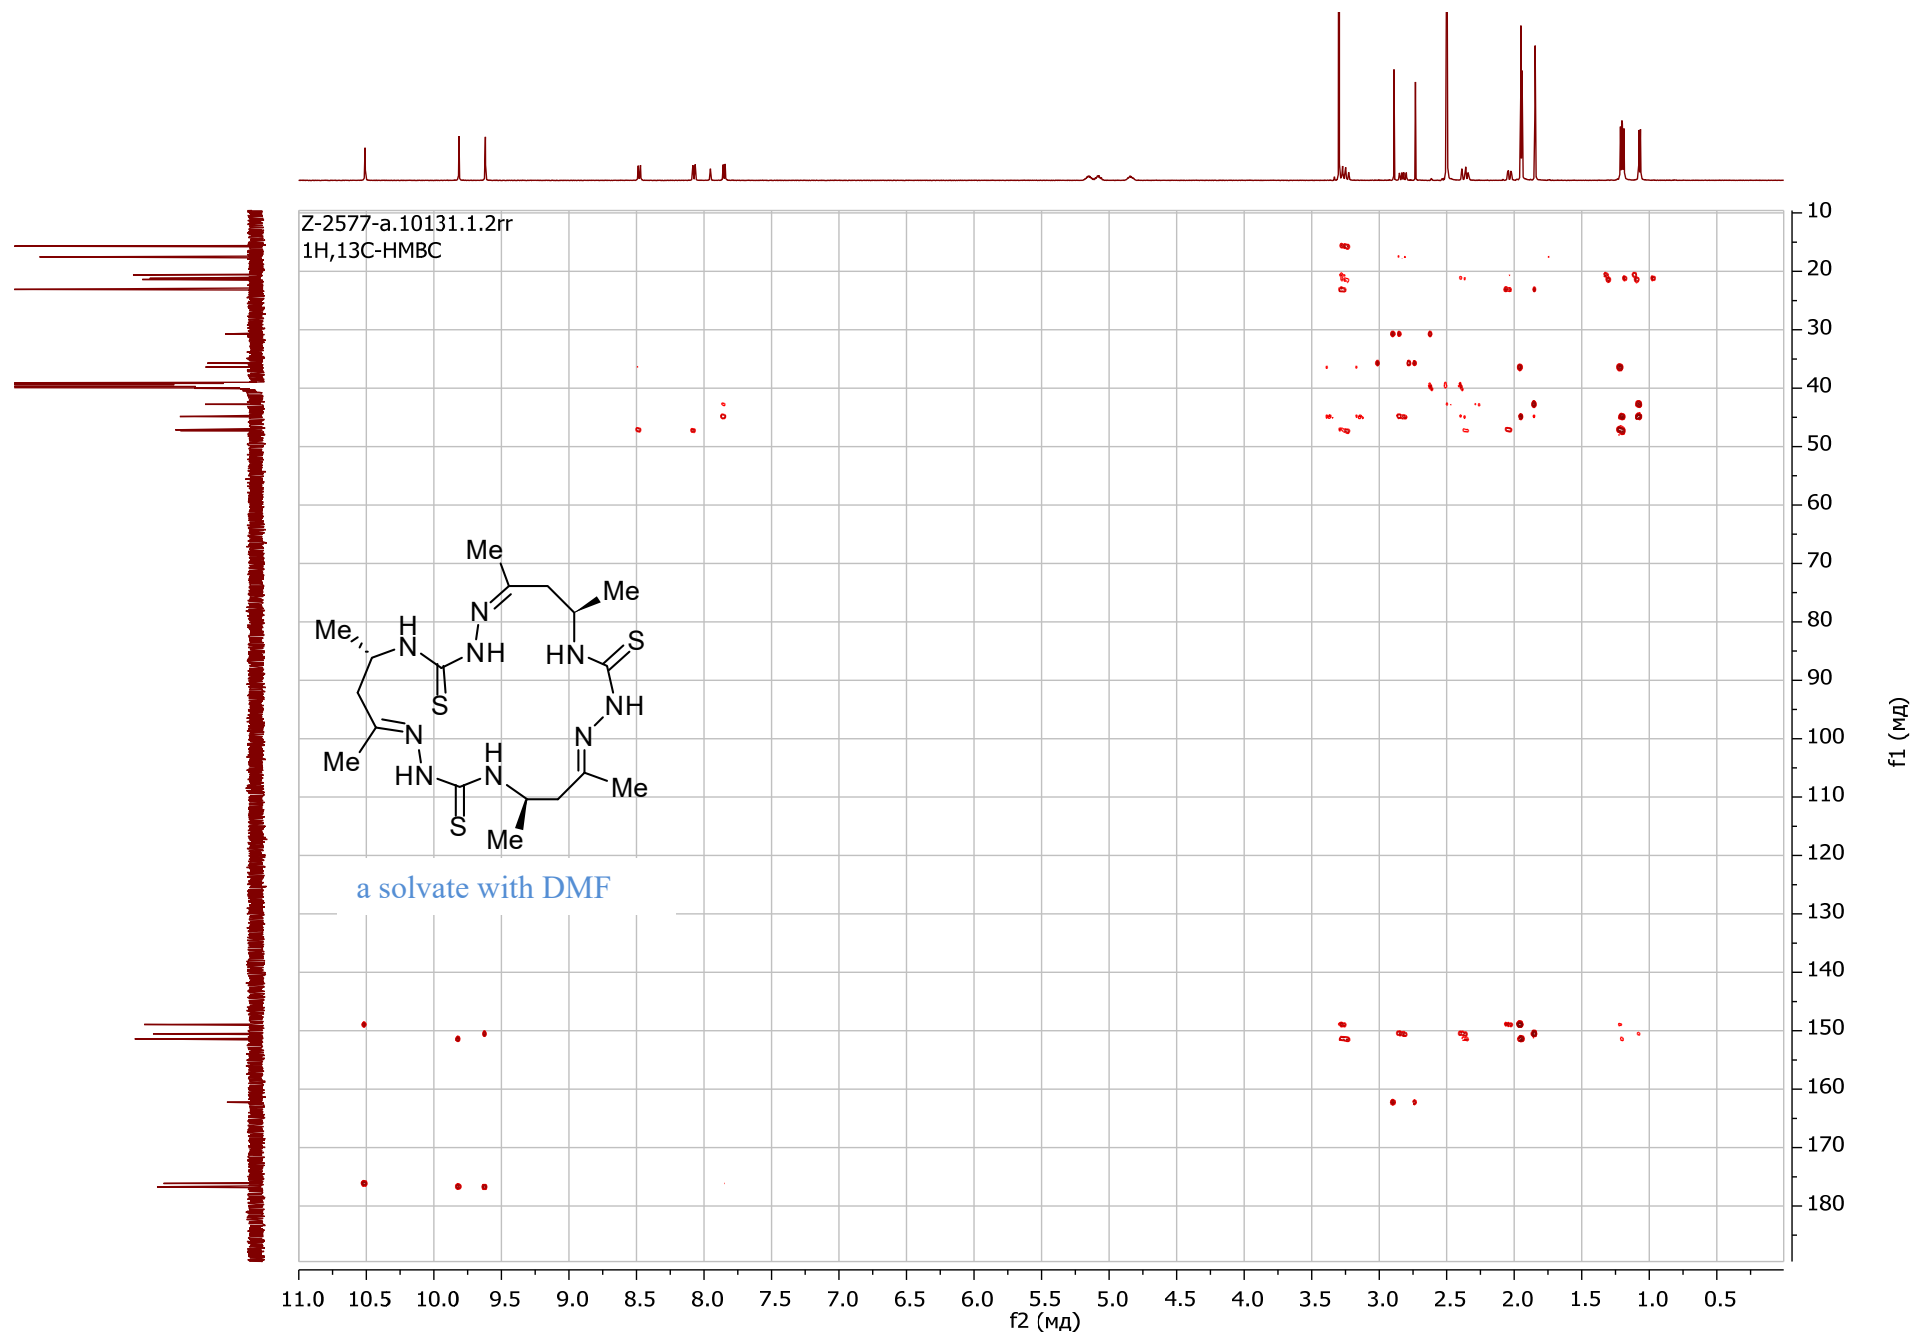

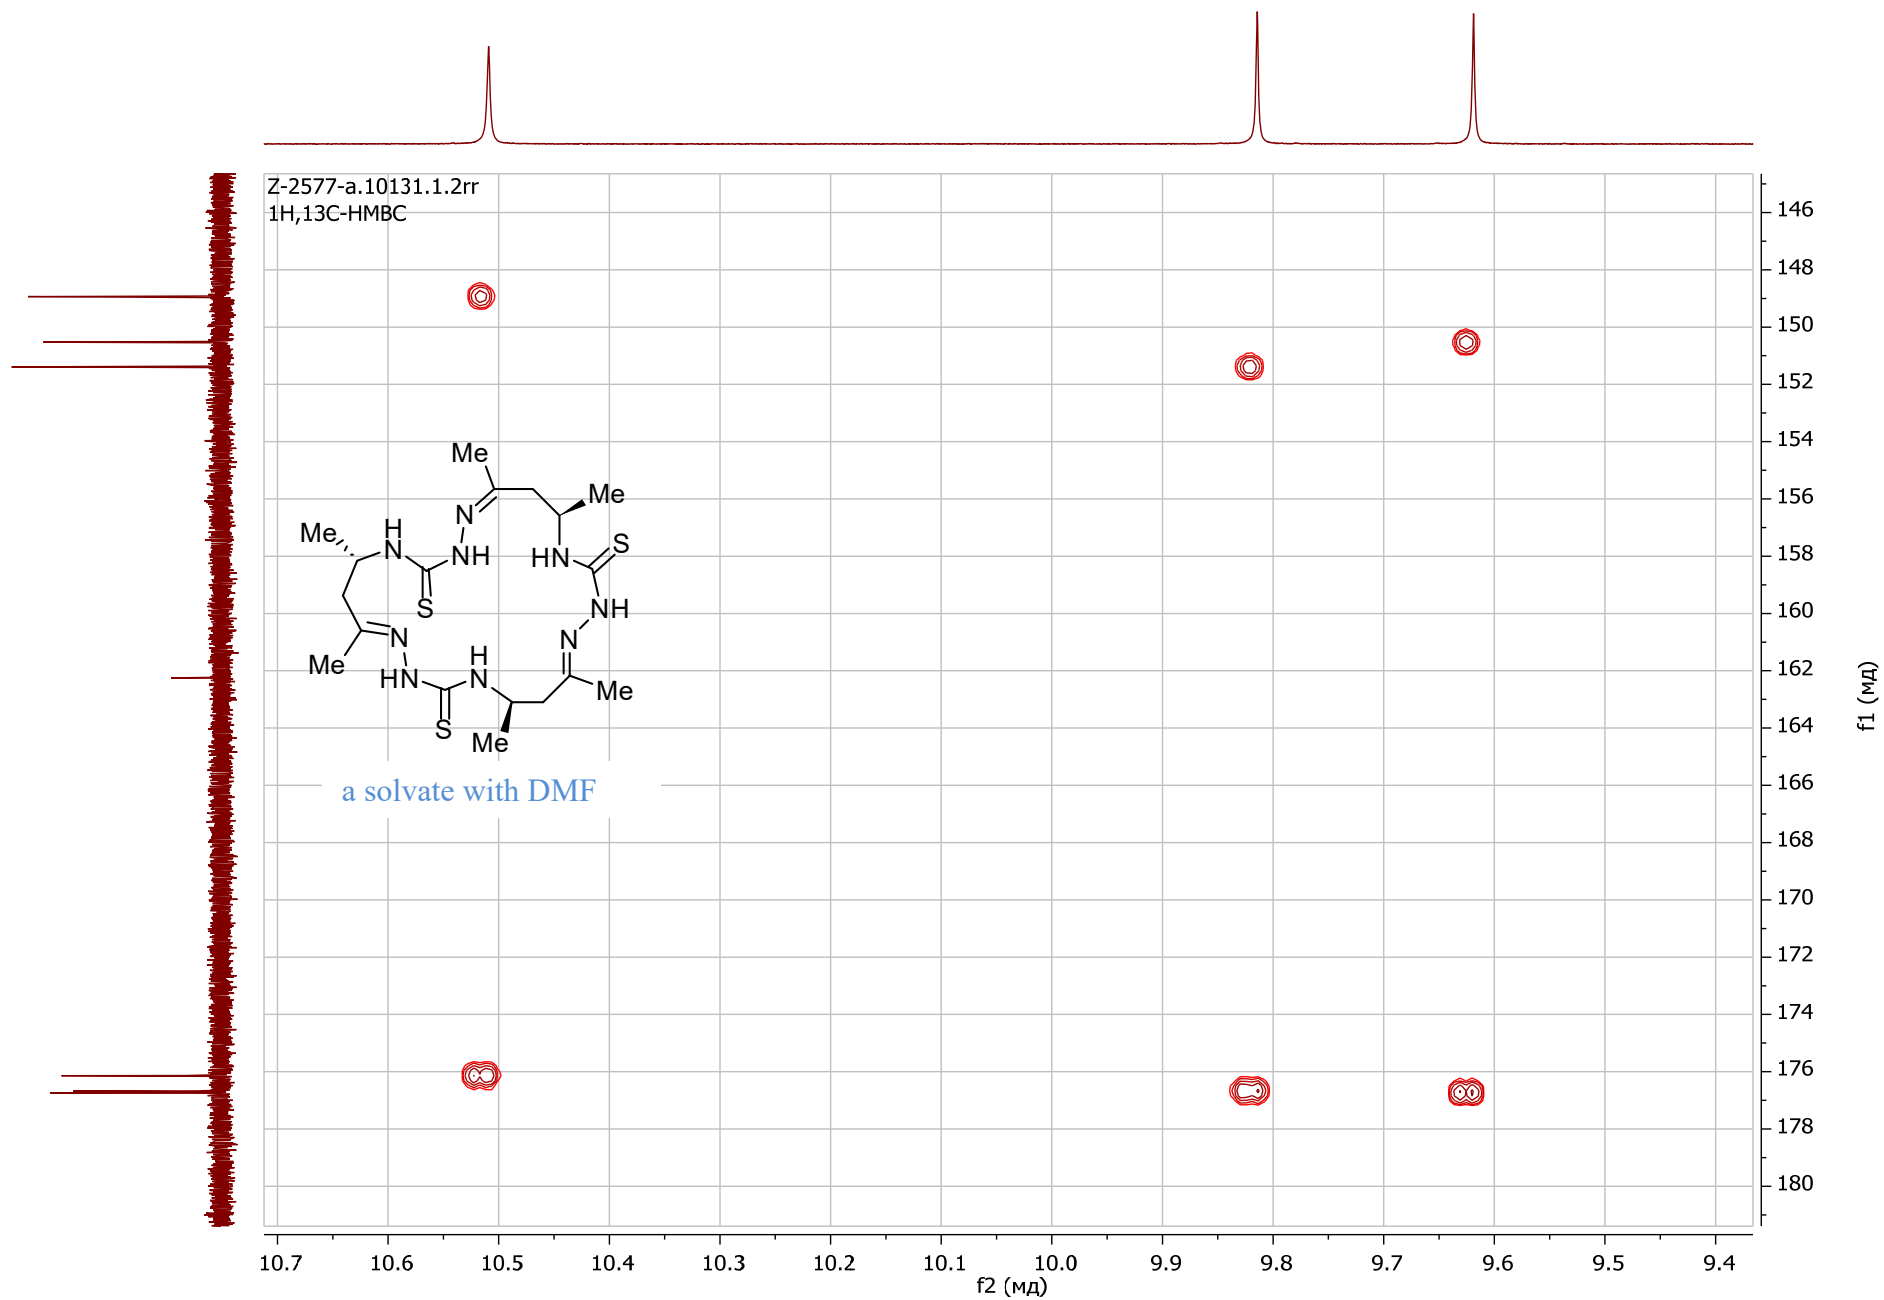

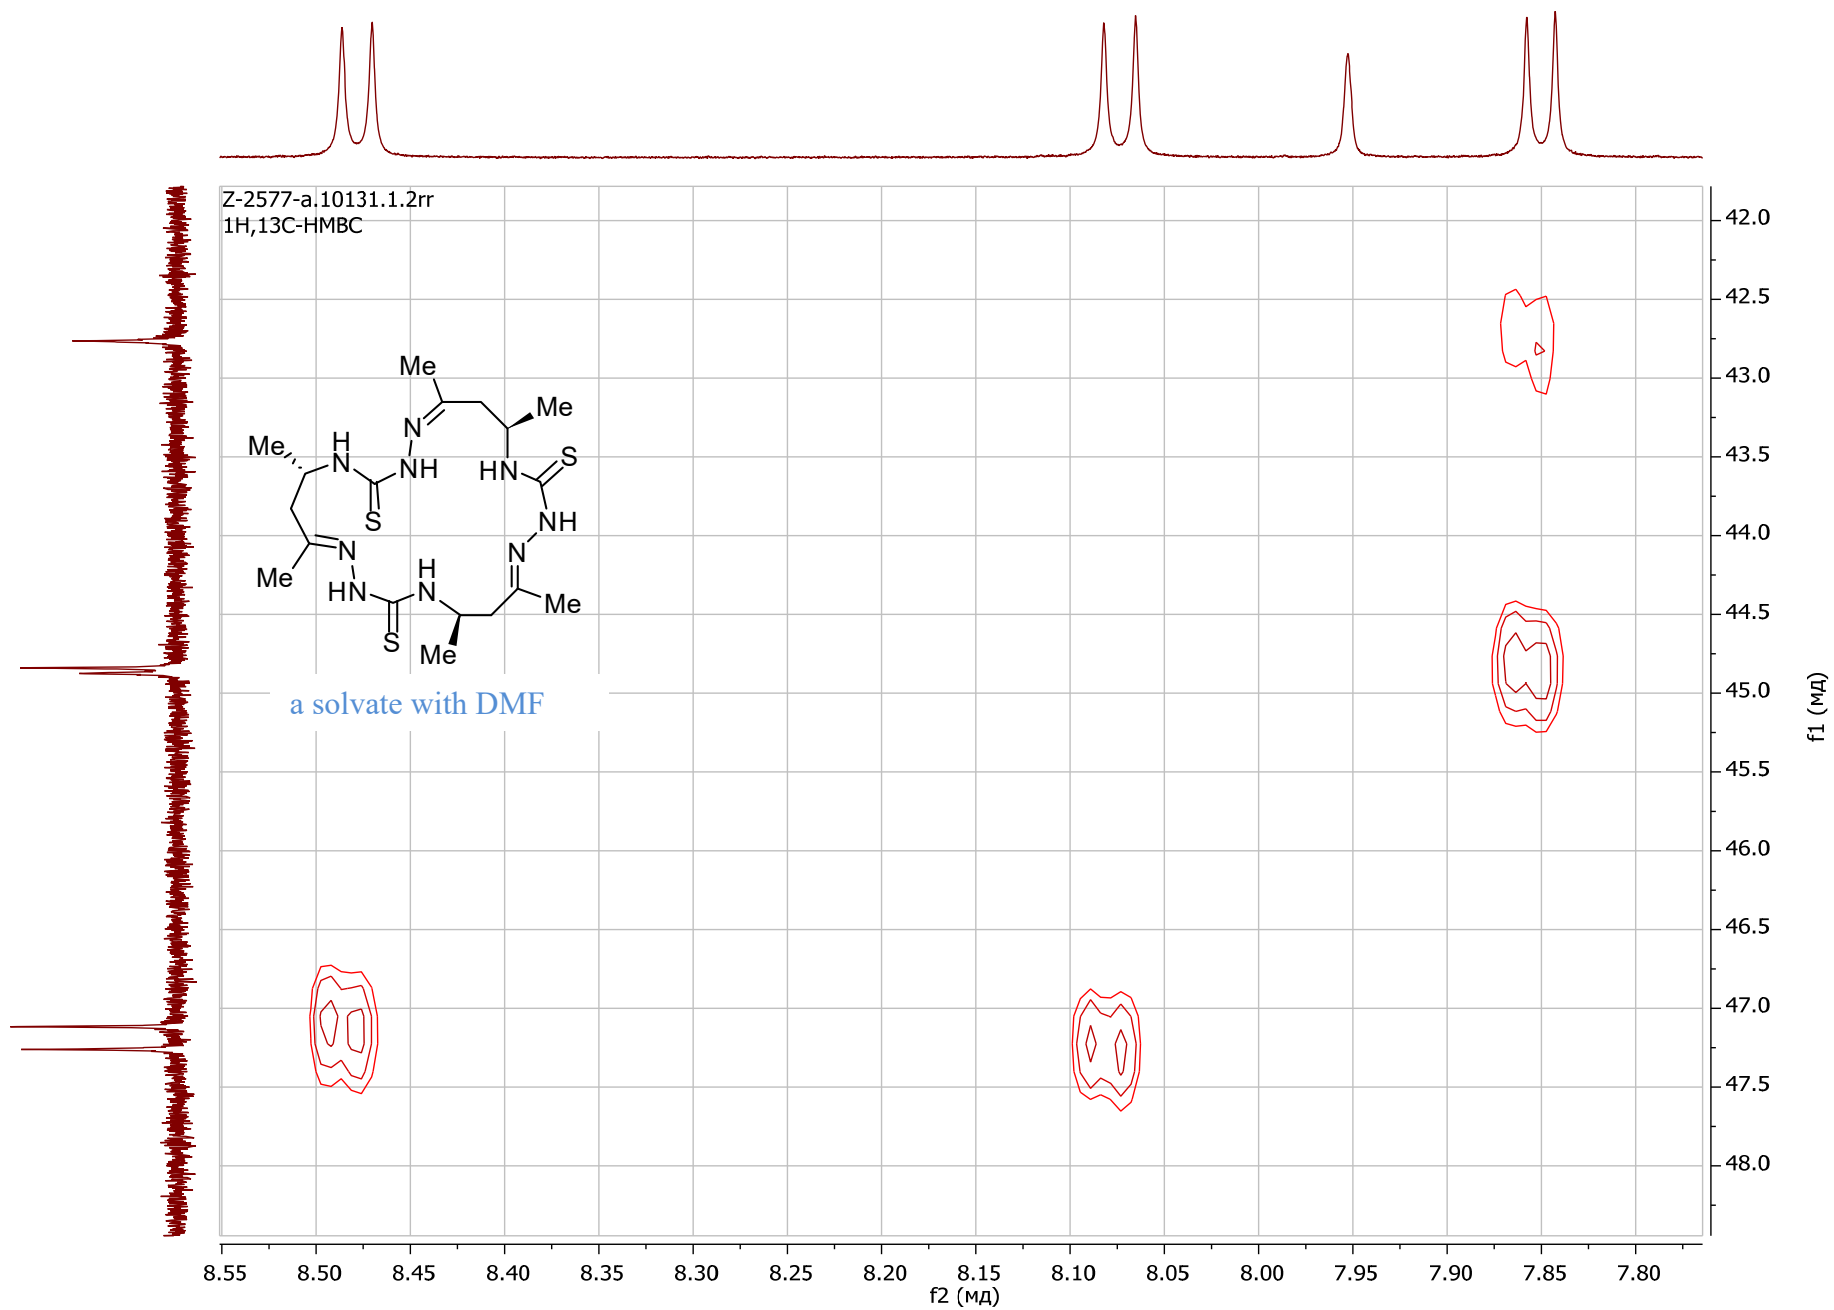

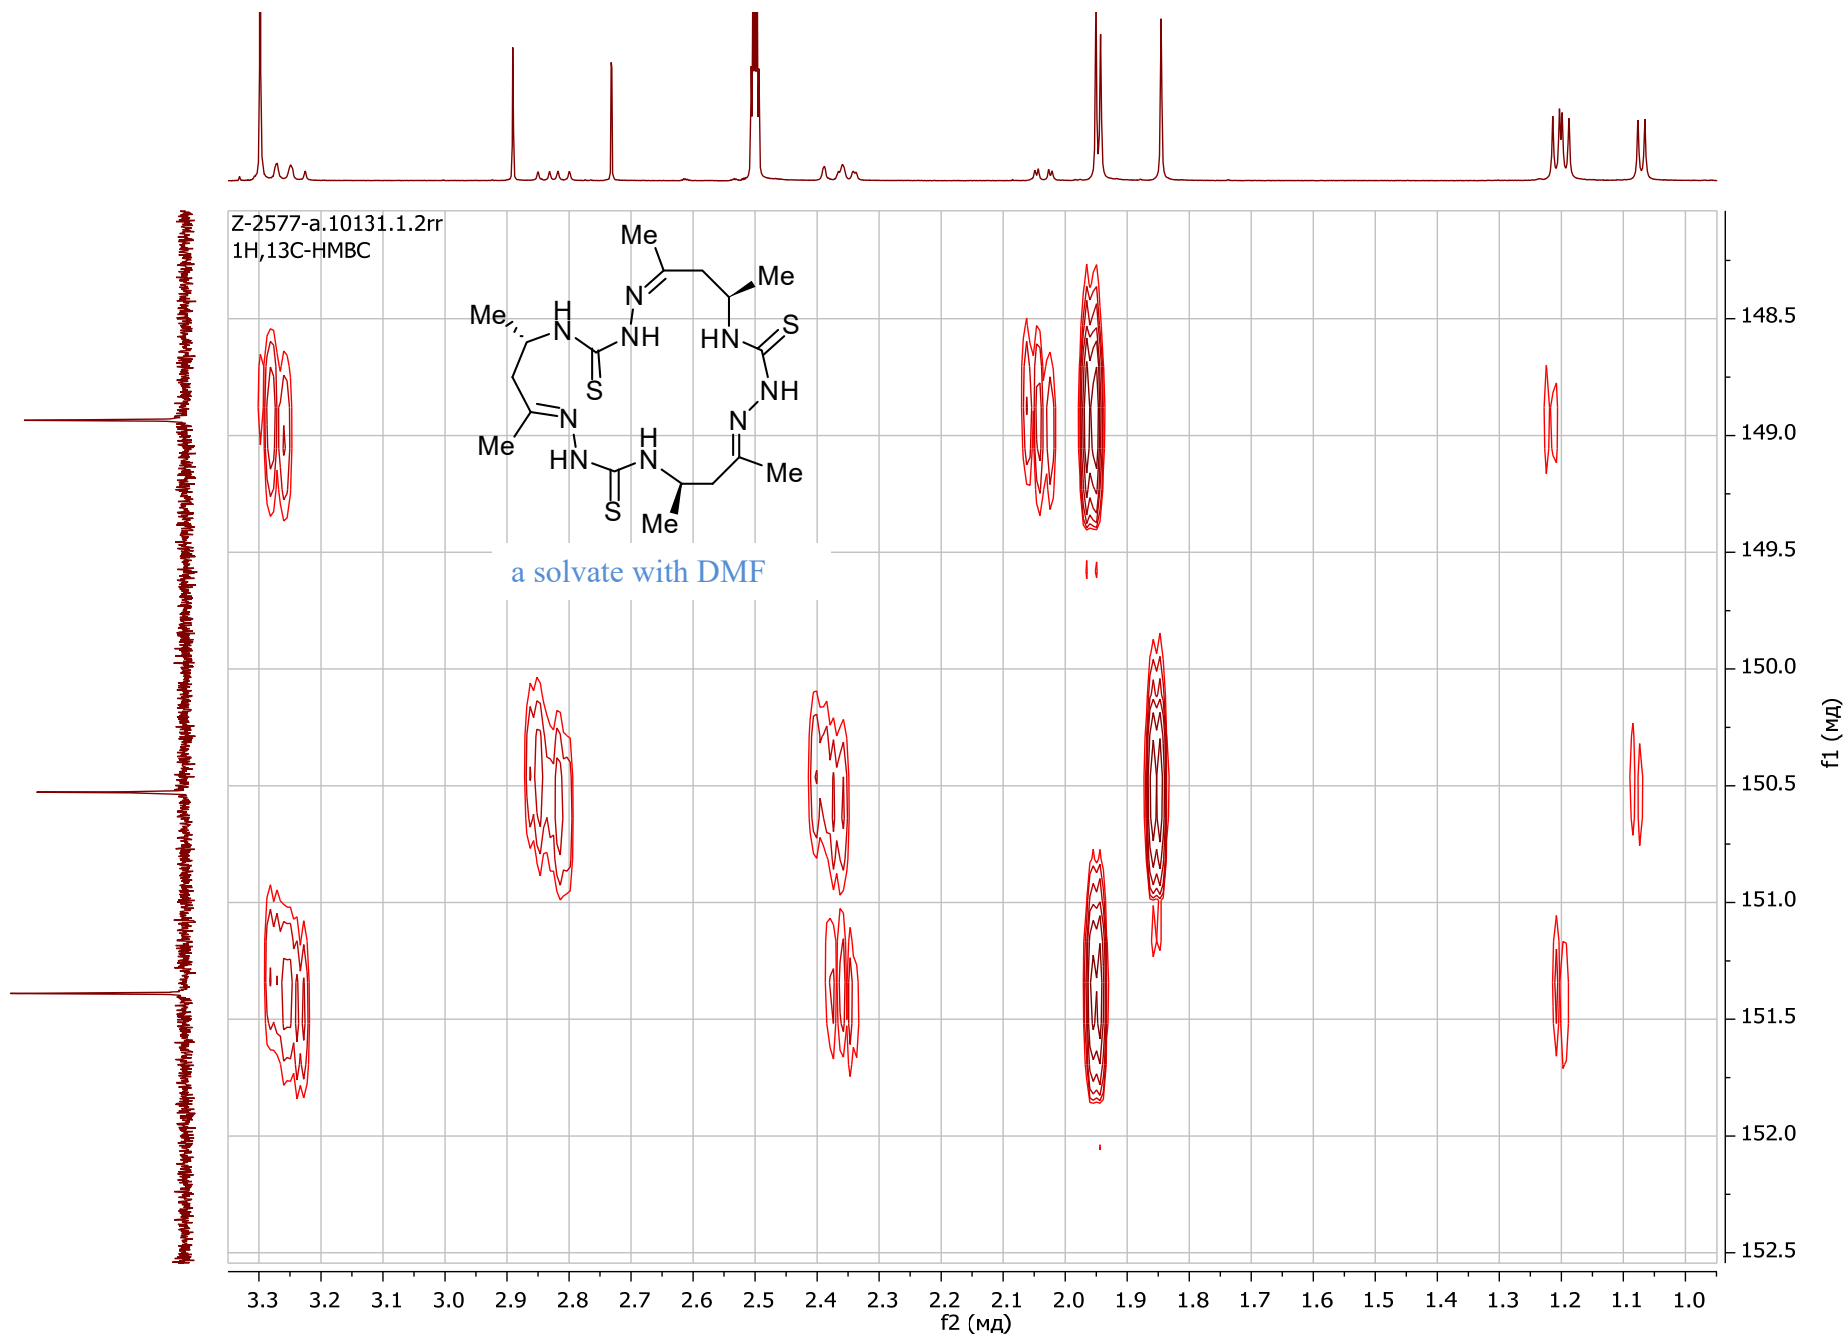

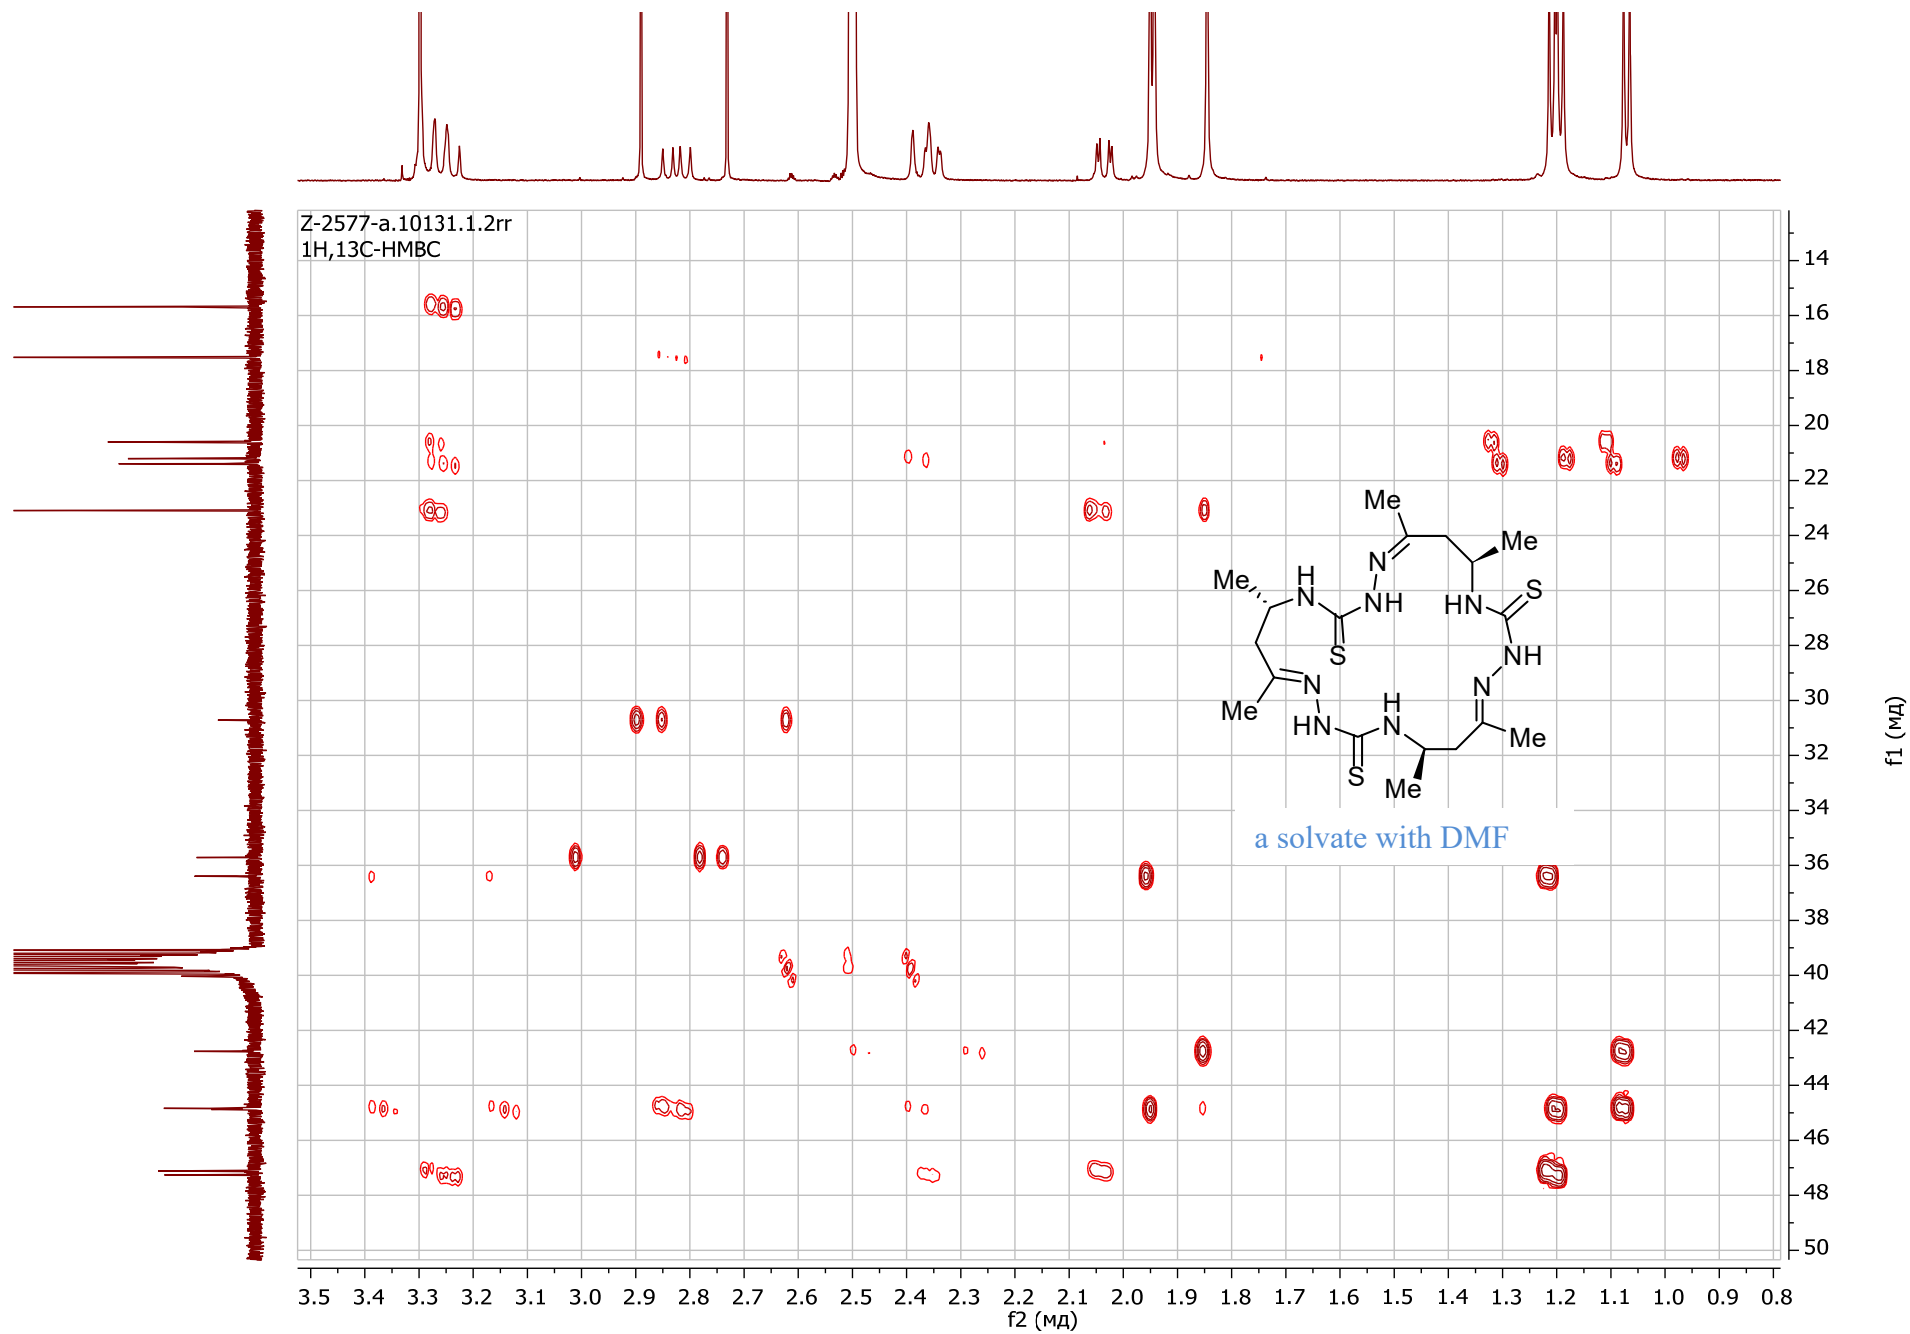

$^1\text{H}, ^1\text{H}$  NOESY spectrum of 21-membered cyclic tris-thiosemicarbazone **7** after crystallization from DMF (600.13 MHz, 30 °C,  $\text{DMSO-}d_6$ )

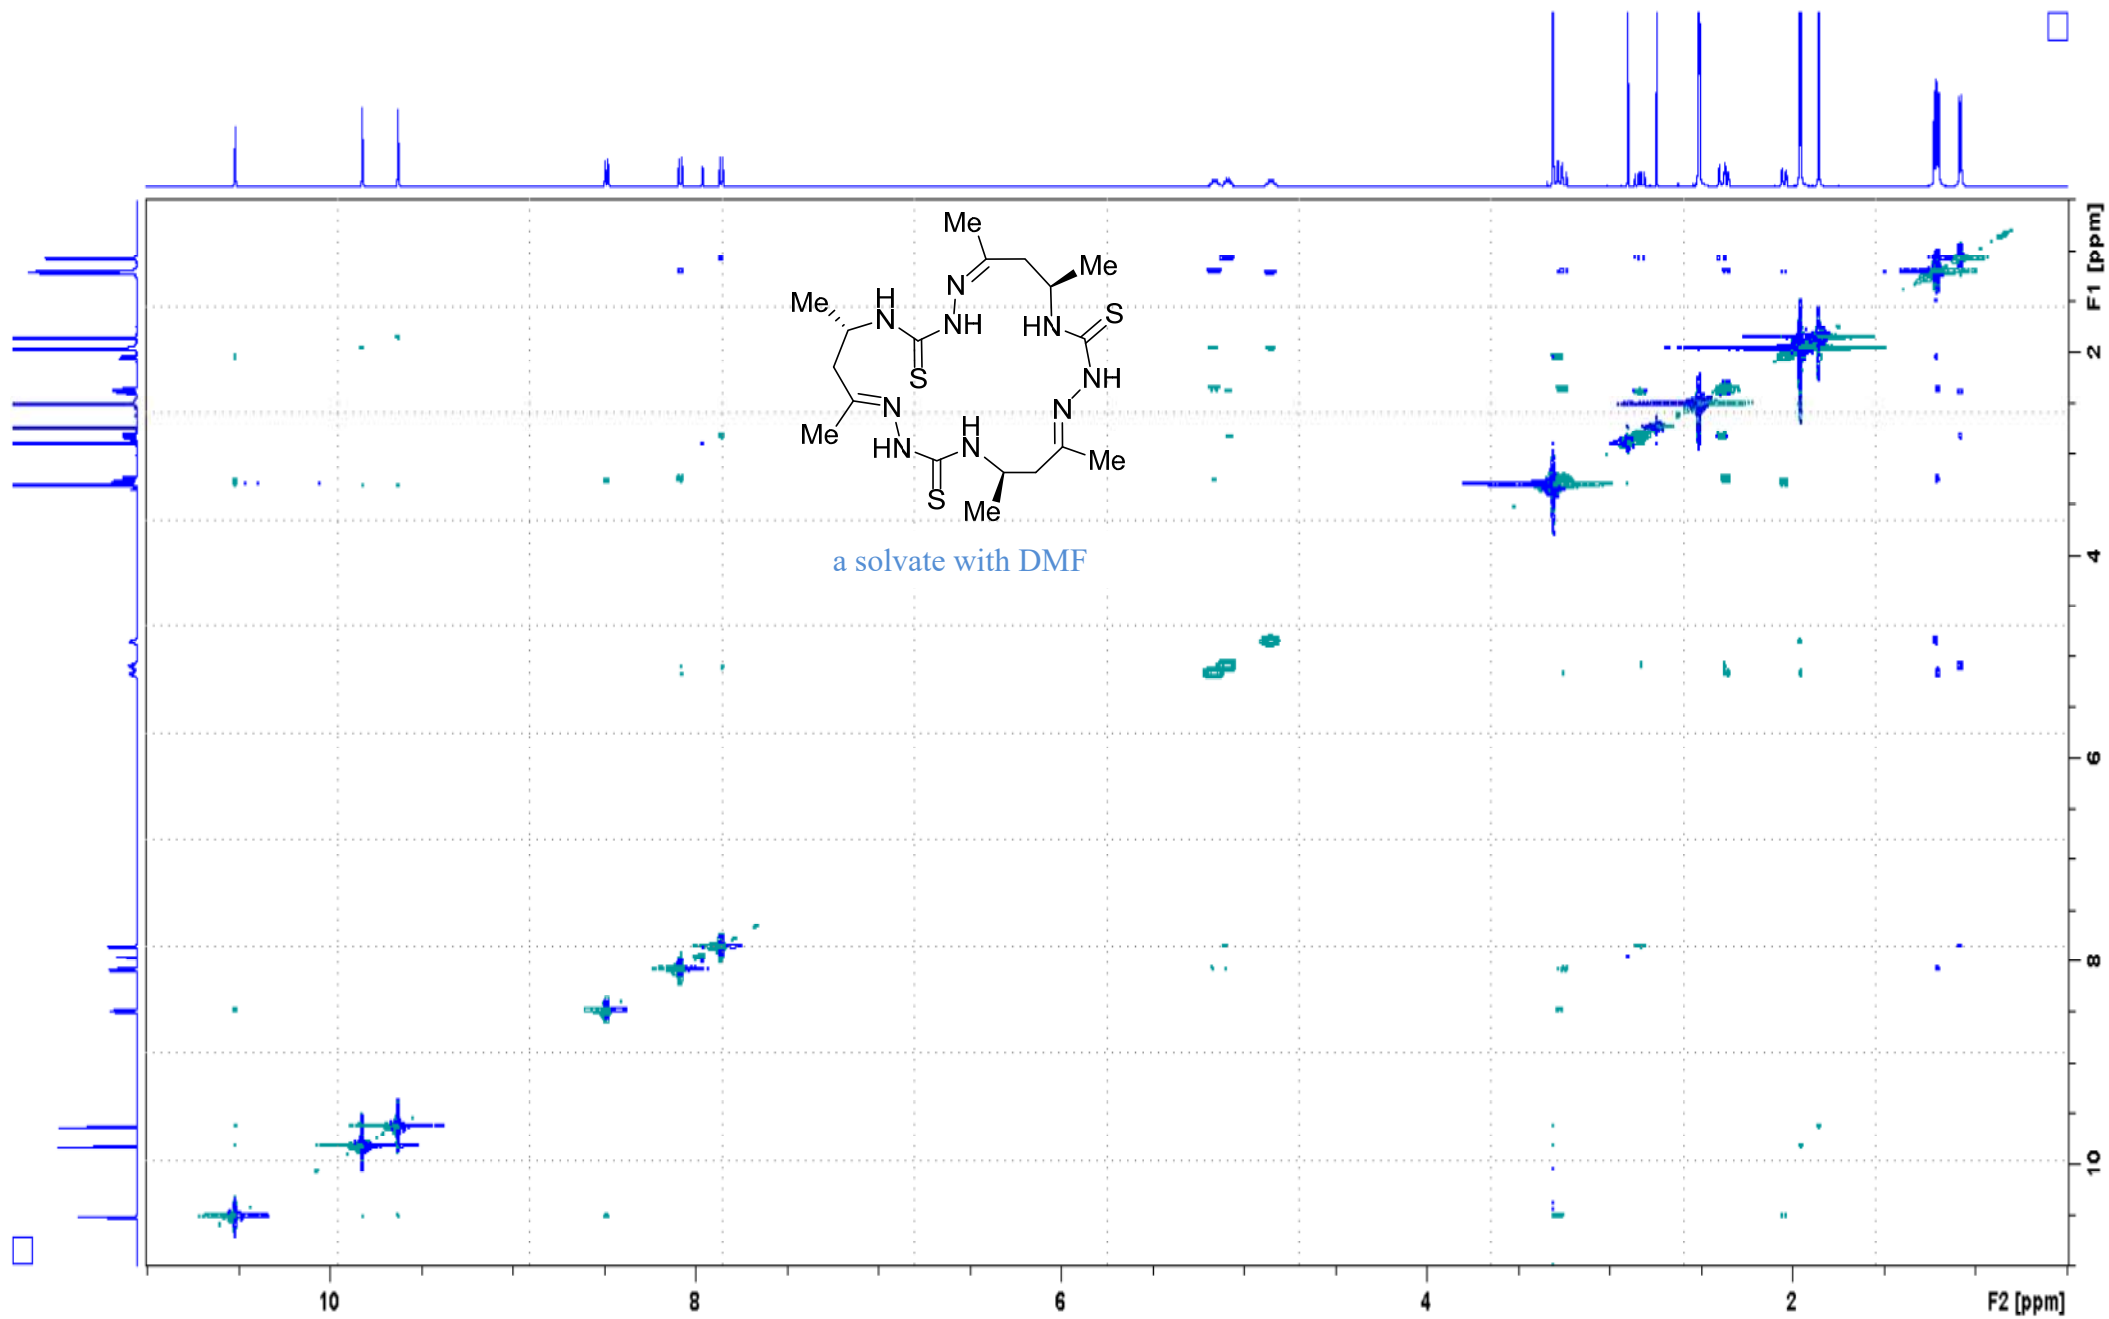

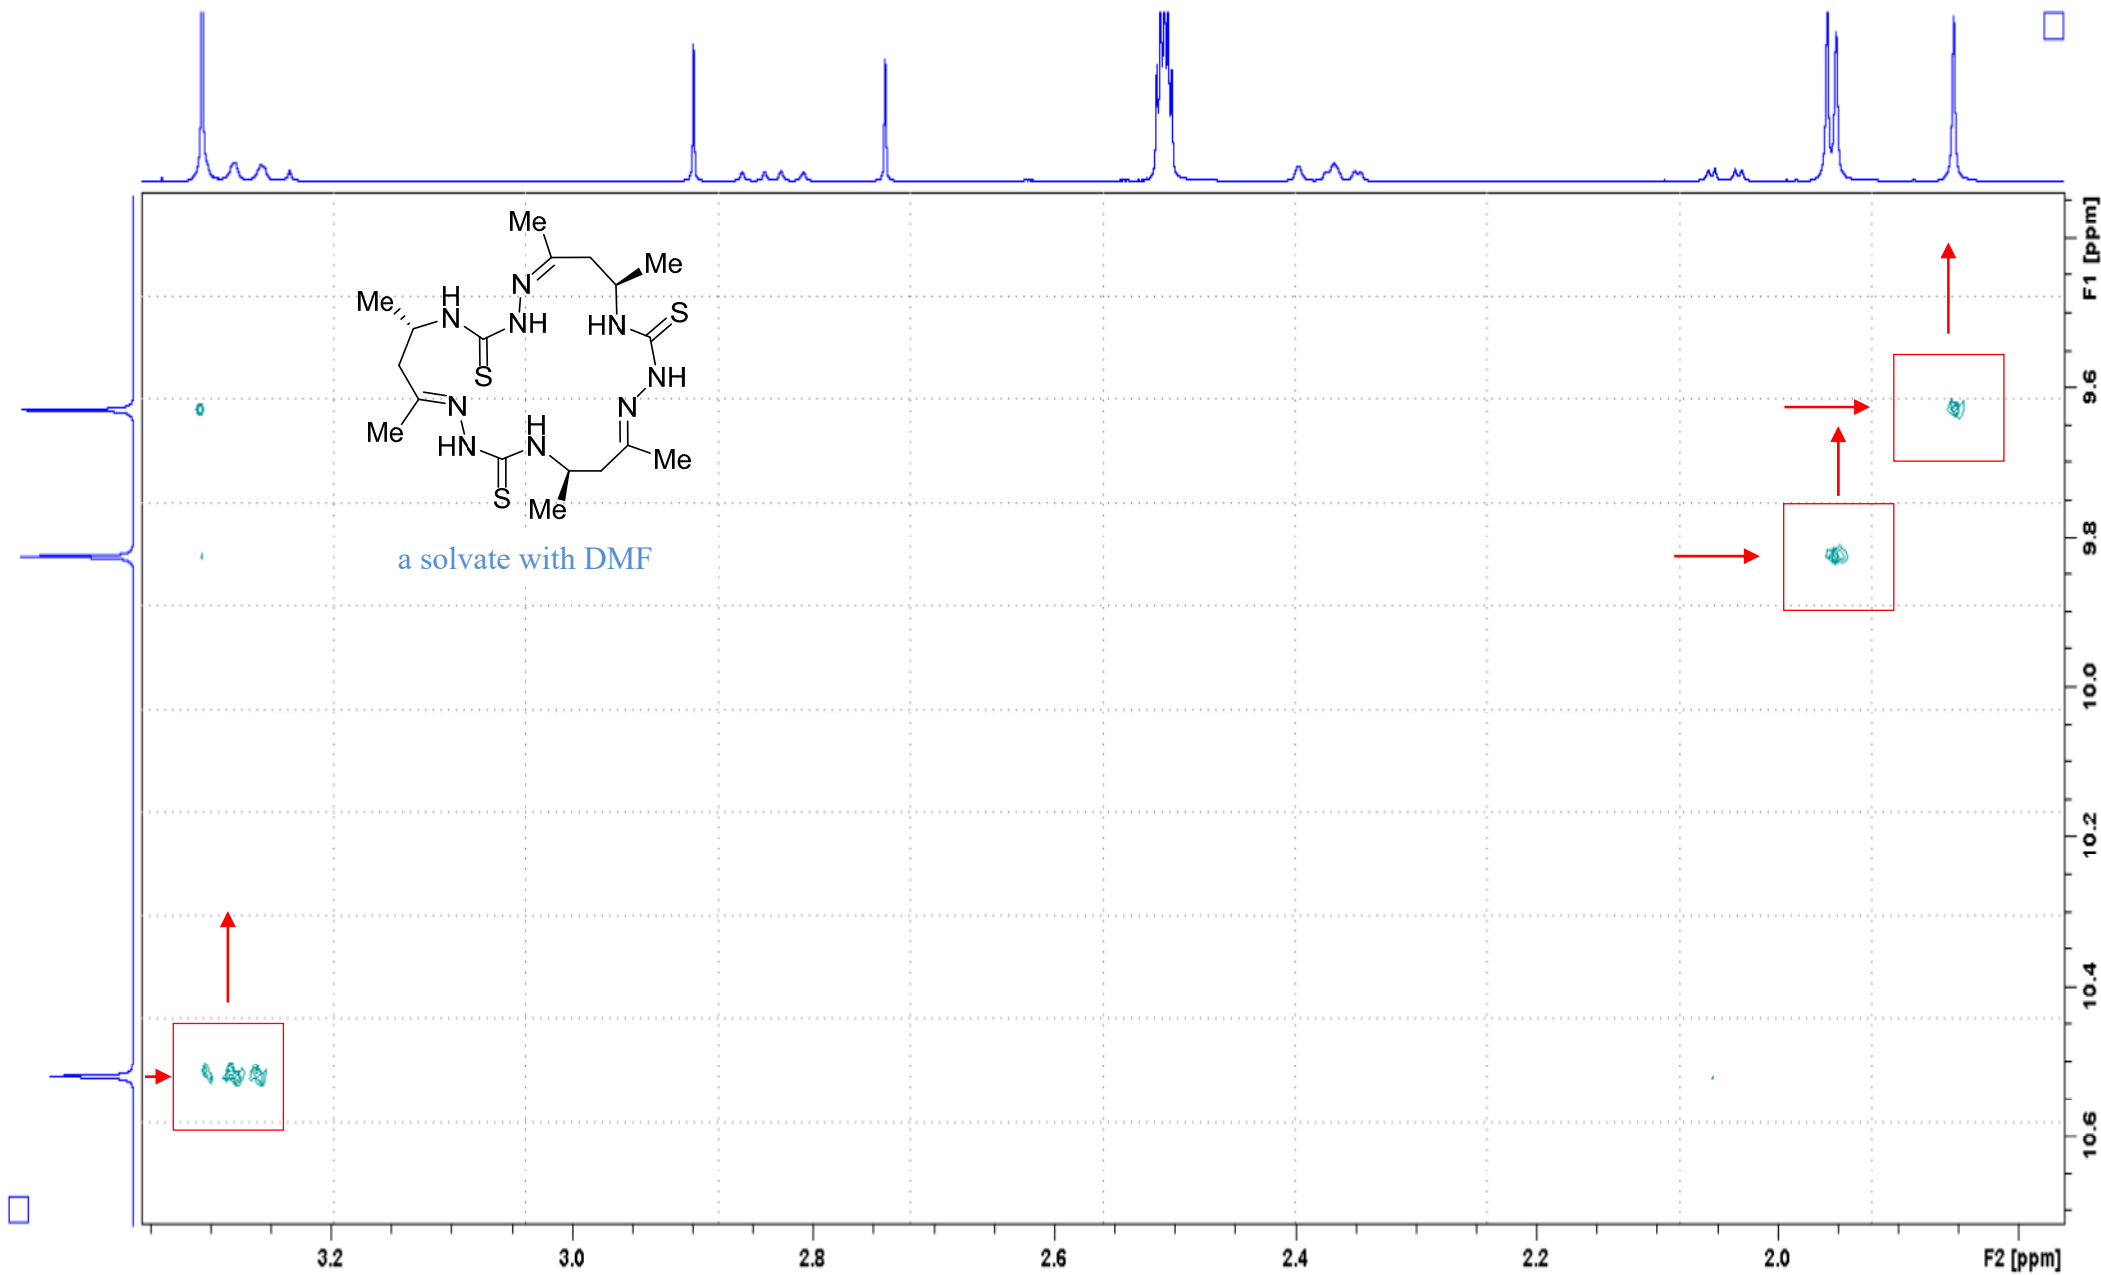



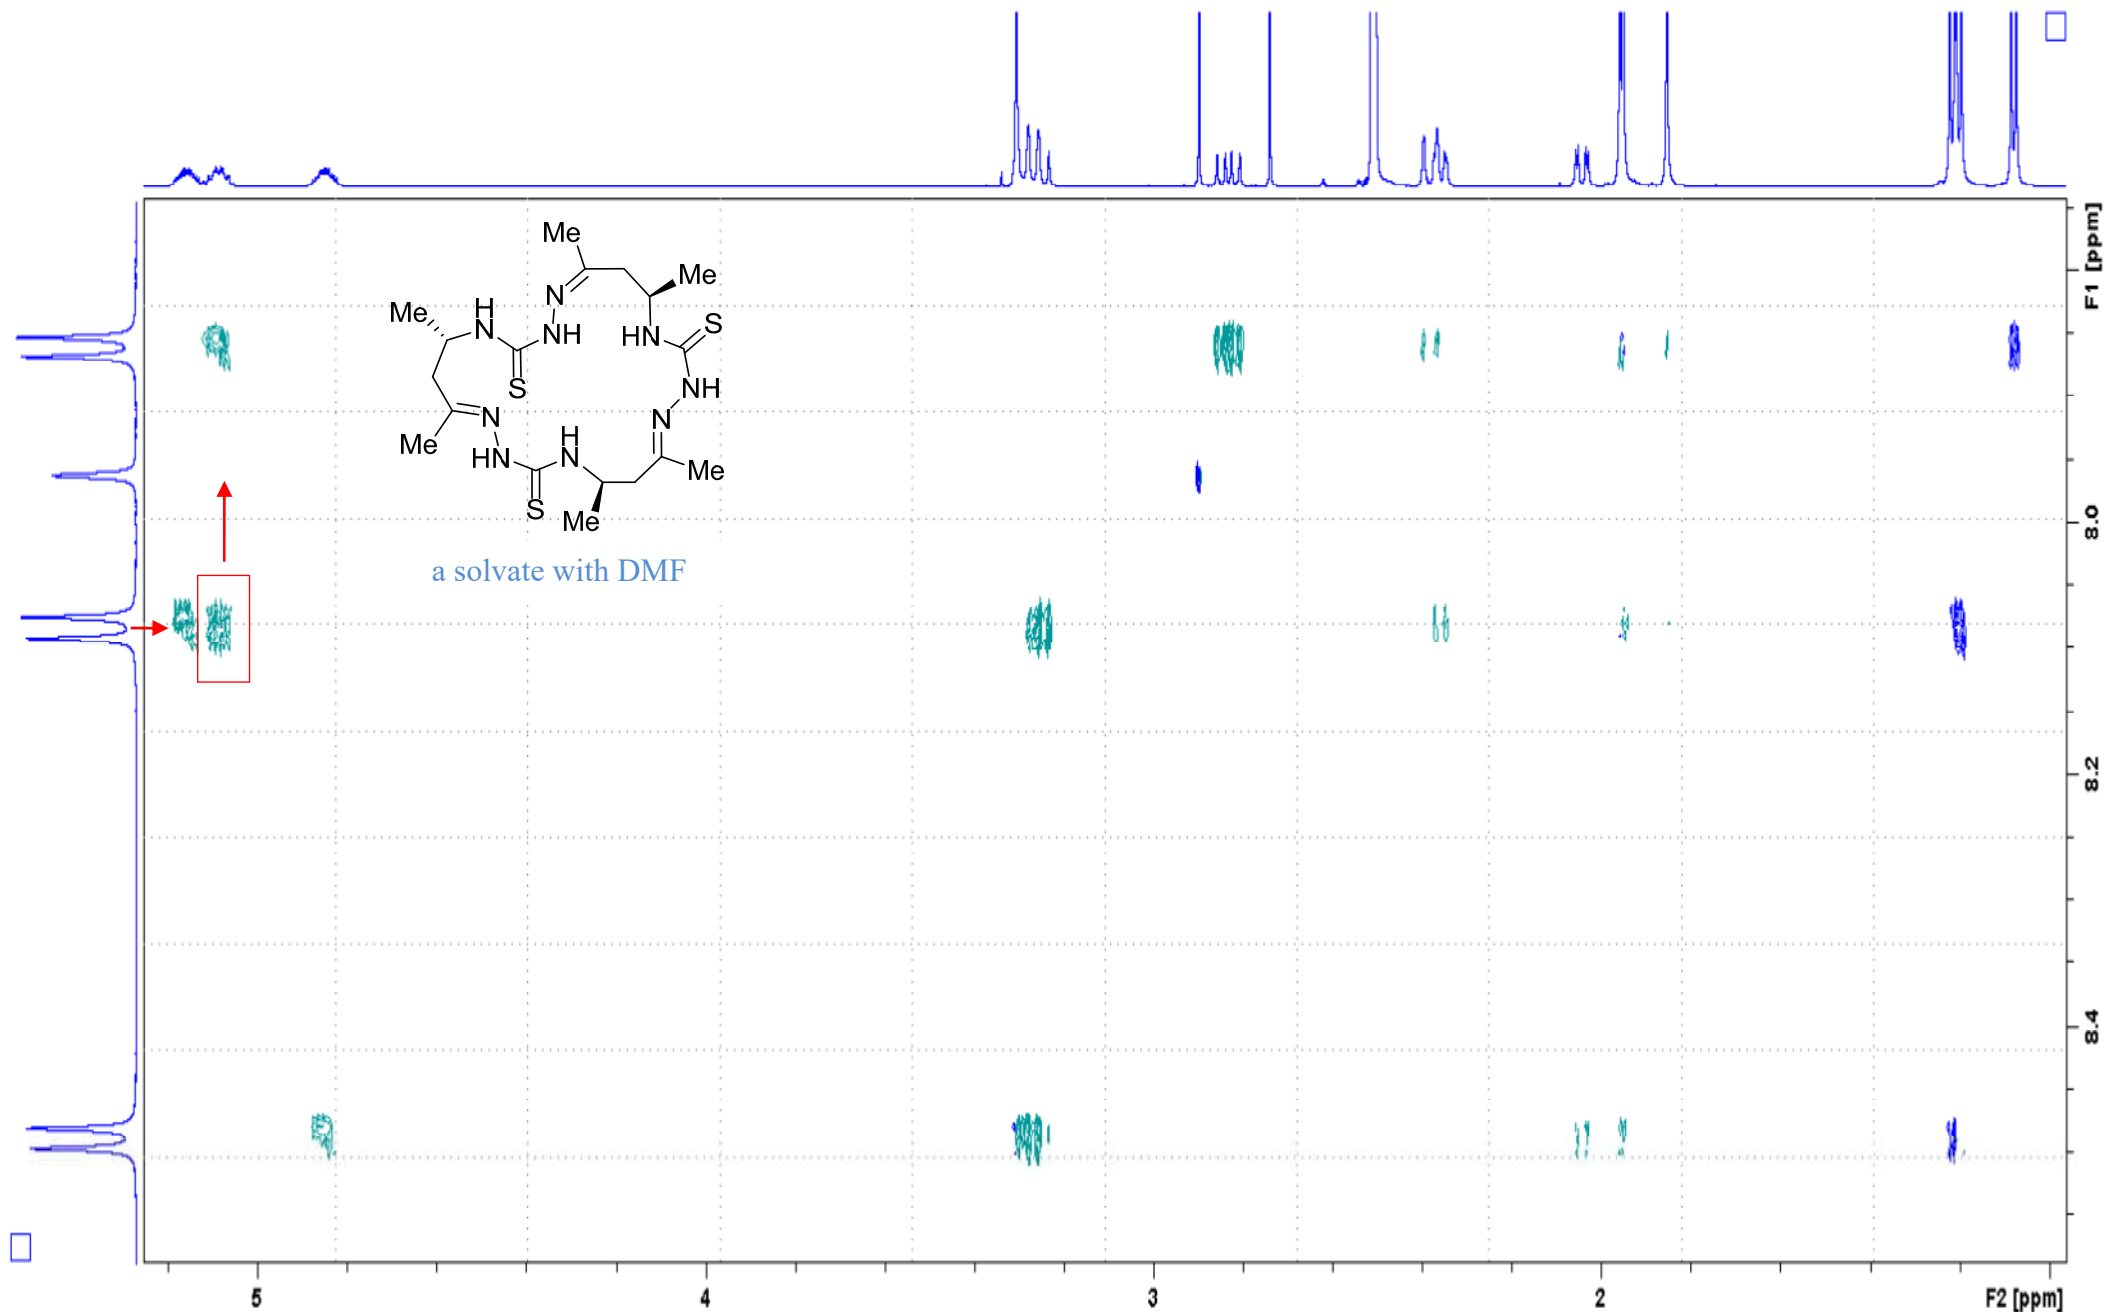

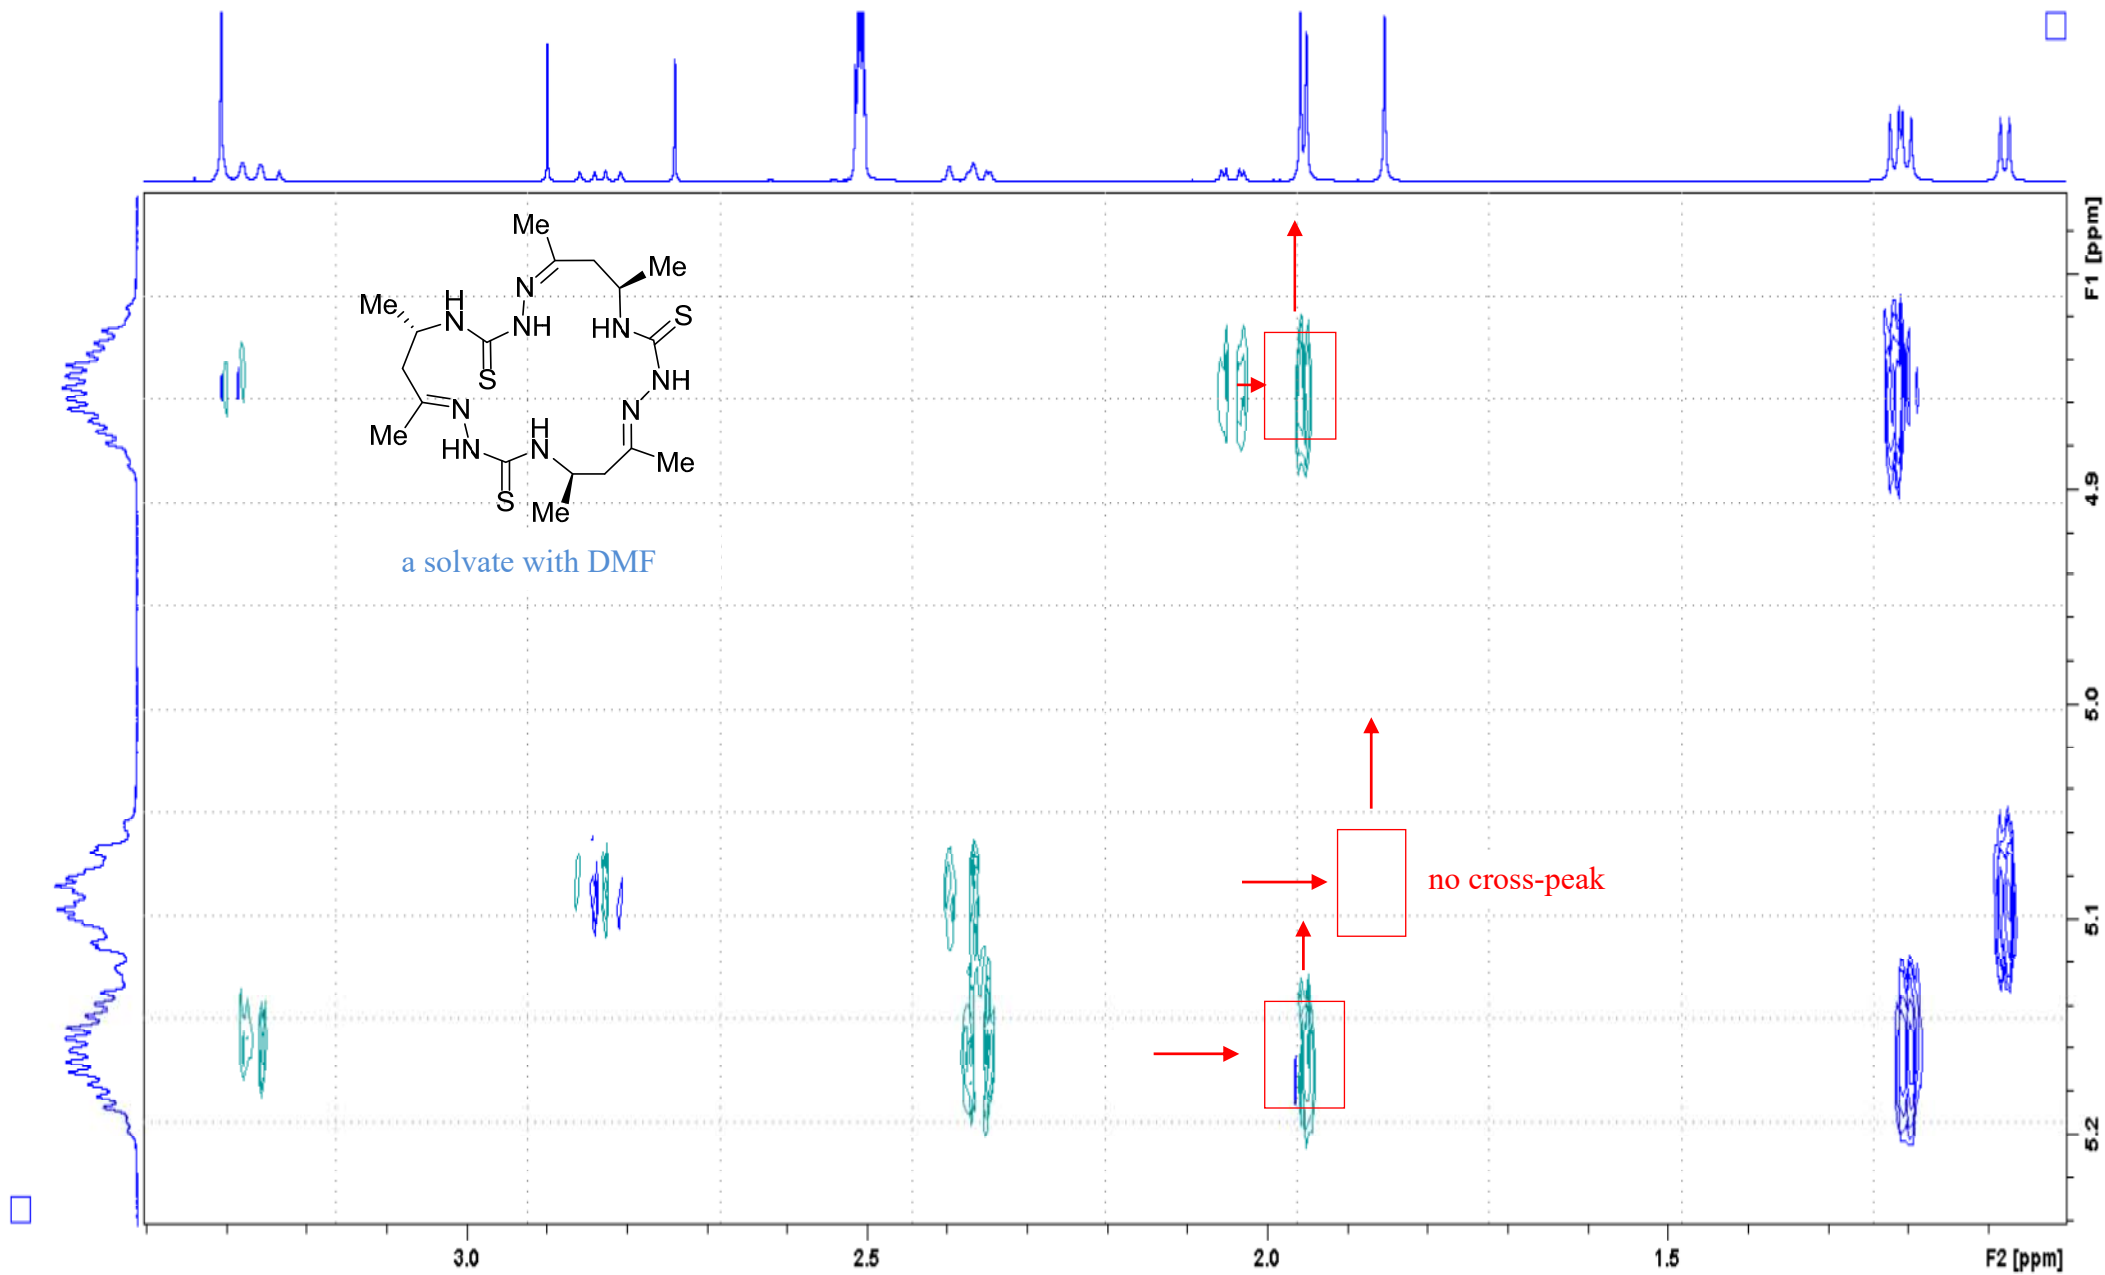

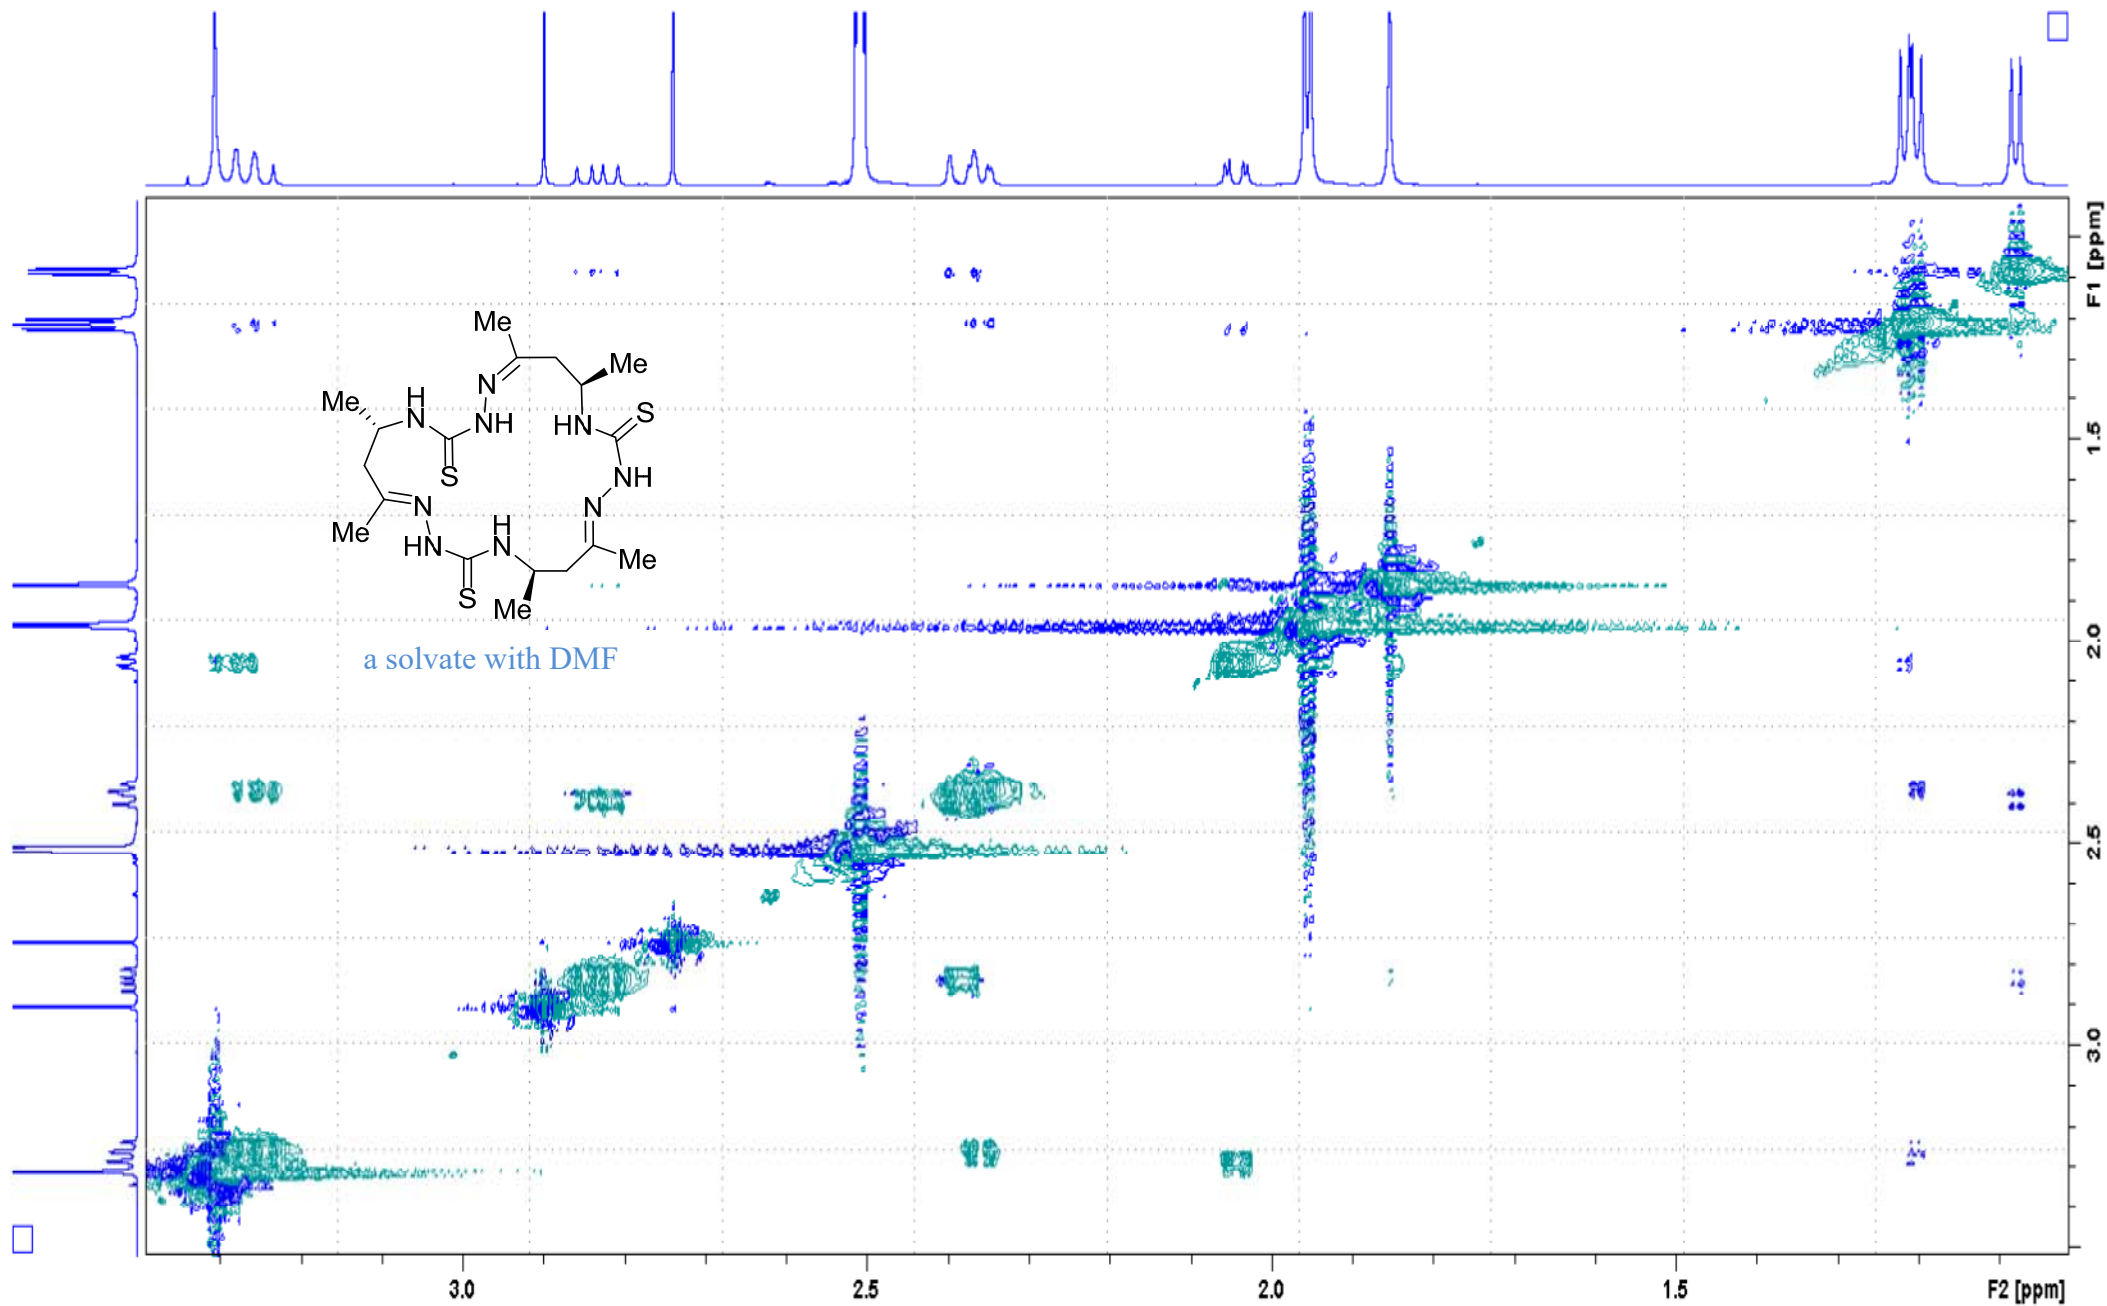

IR spectrum of hydrazone **5** (Nujol).

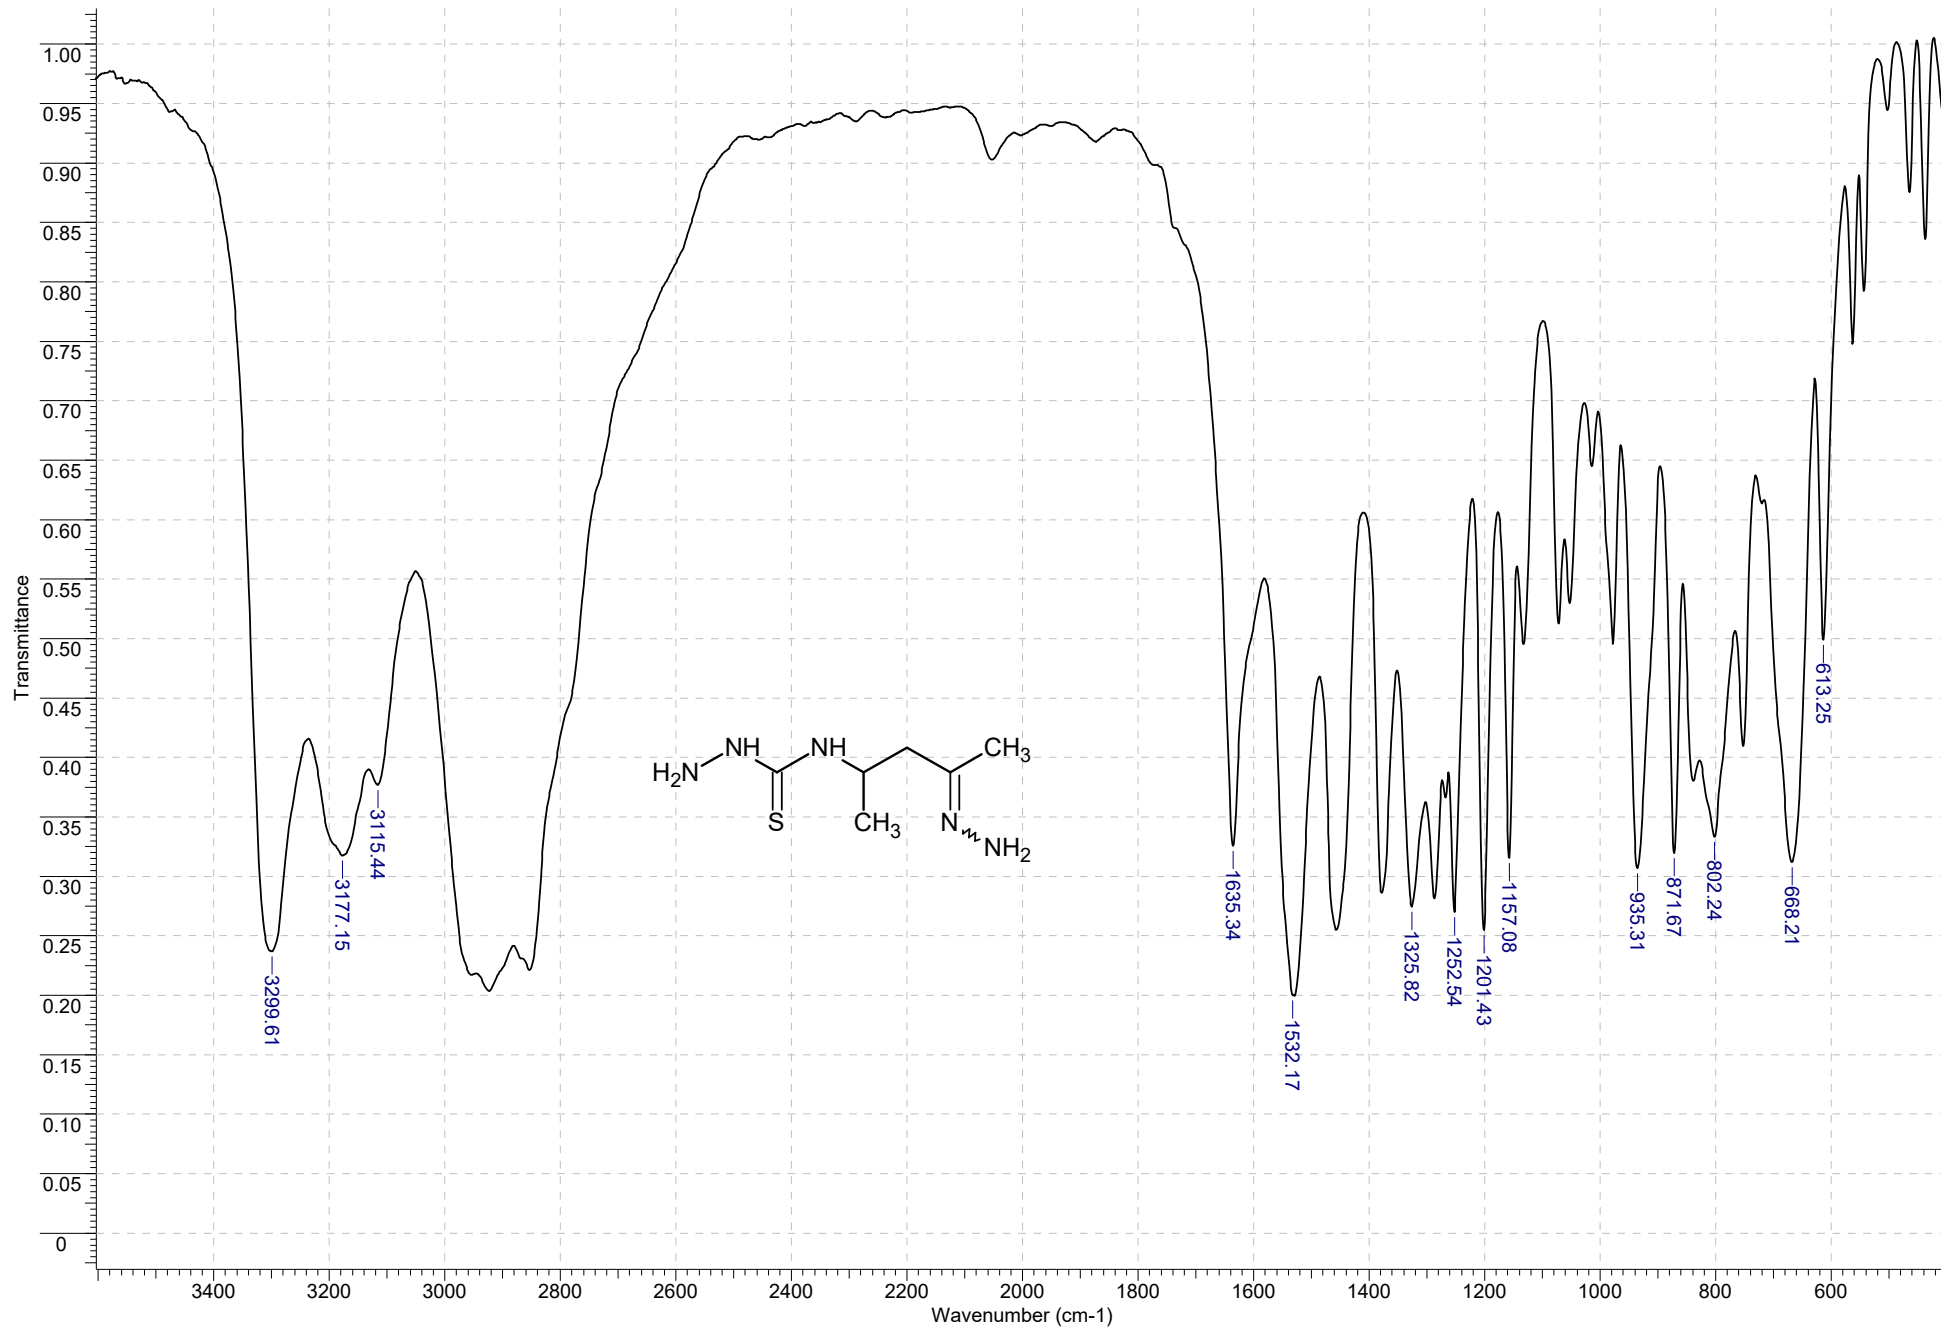

IR spectrum of 14-membered cyclic bis-thiosemicarbazone **6** (Nujol).

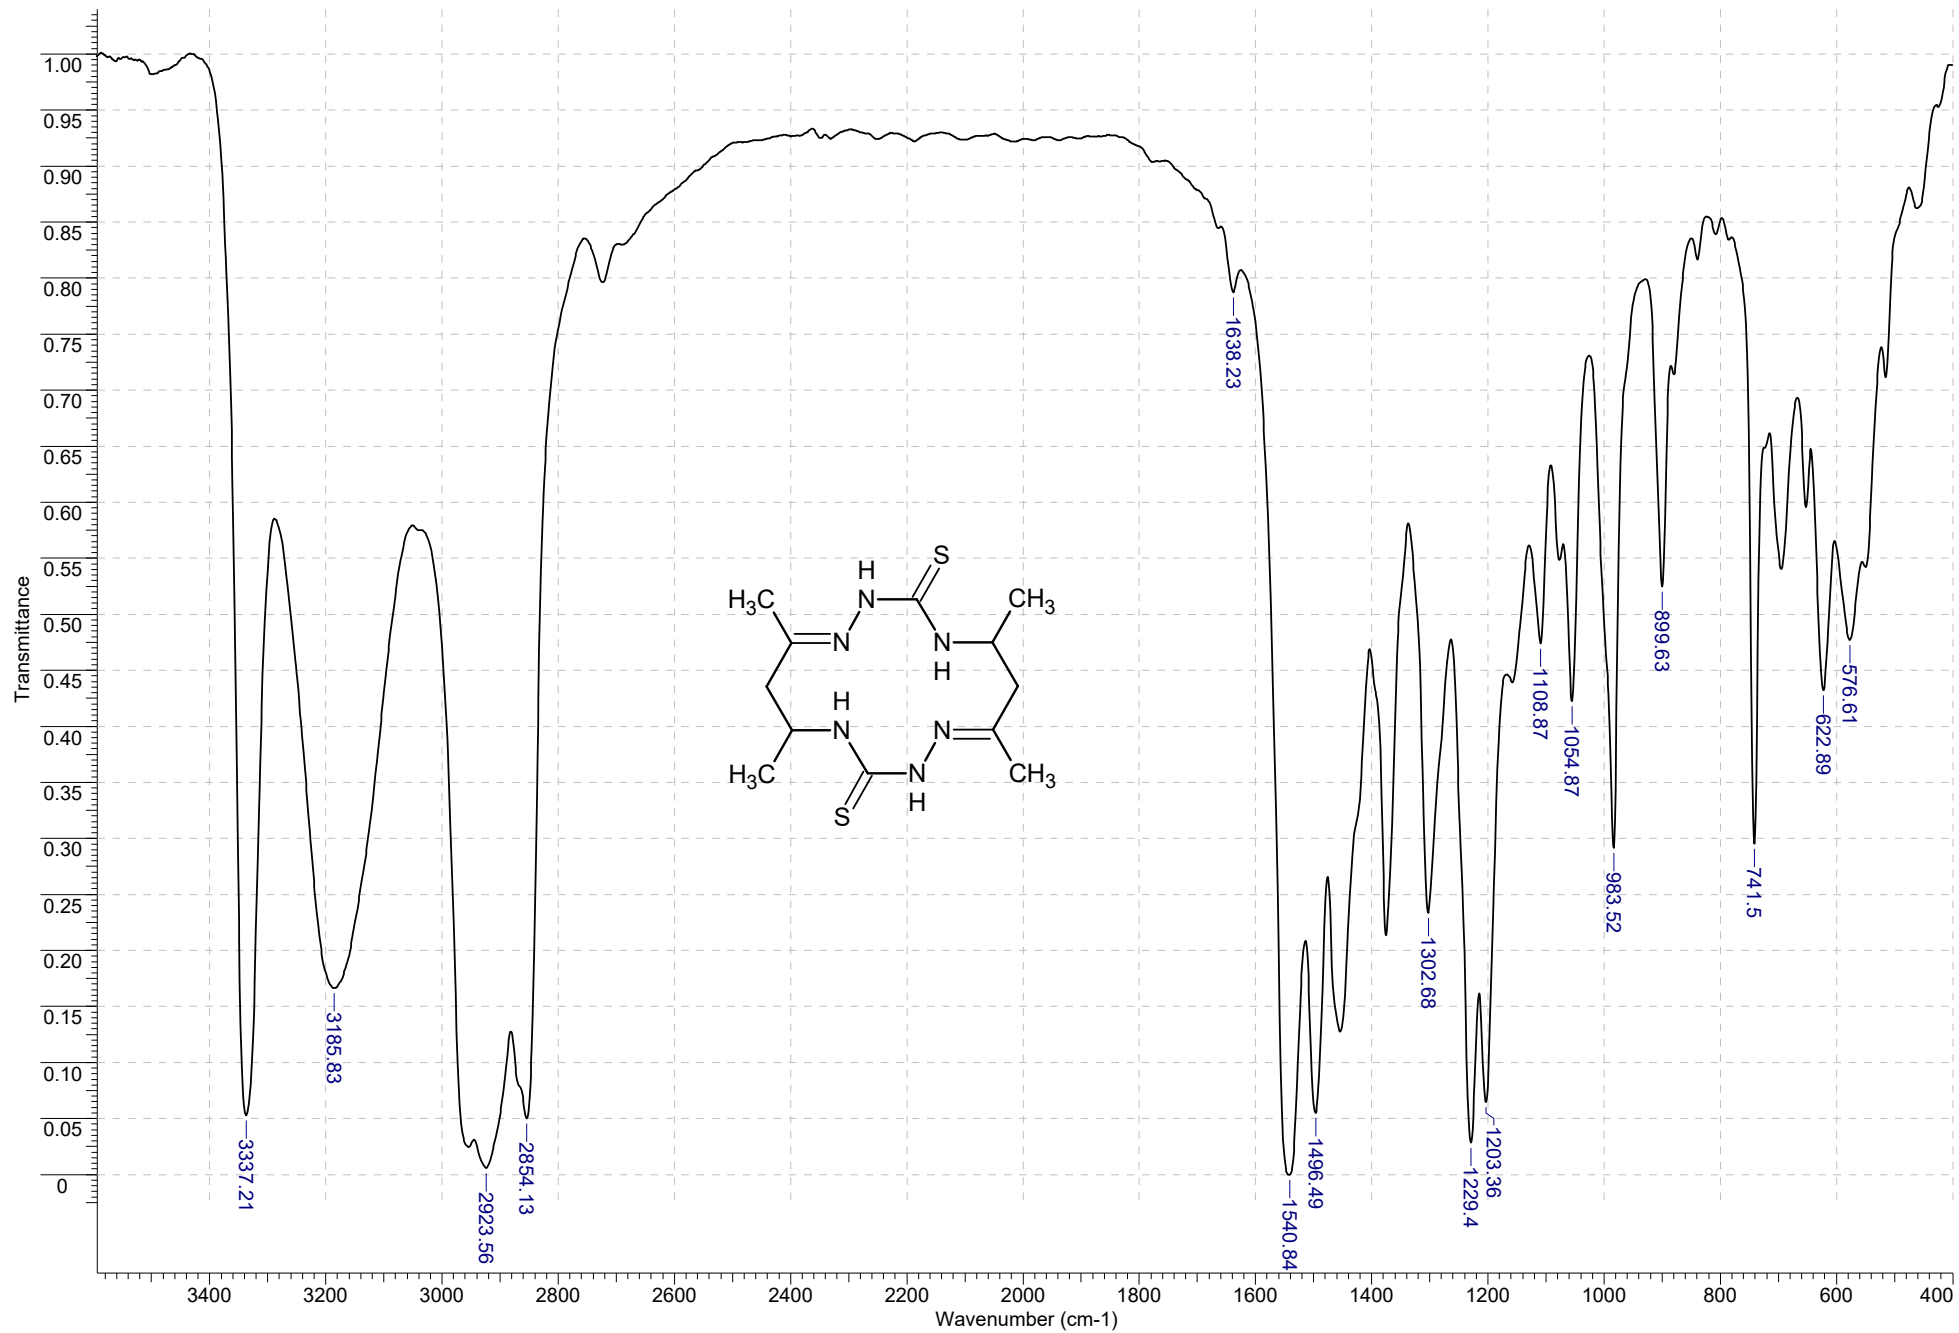

IR spectrum of crude 21-membered cyclic tris-thiosemicarbazone **7** (KBr).

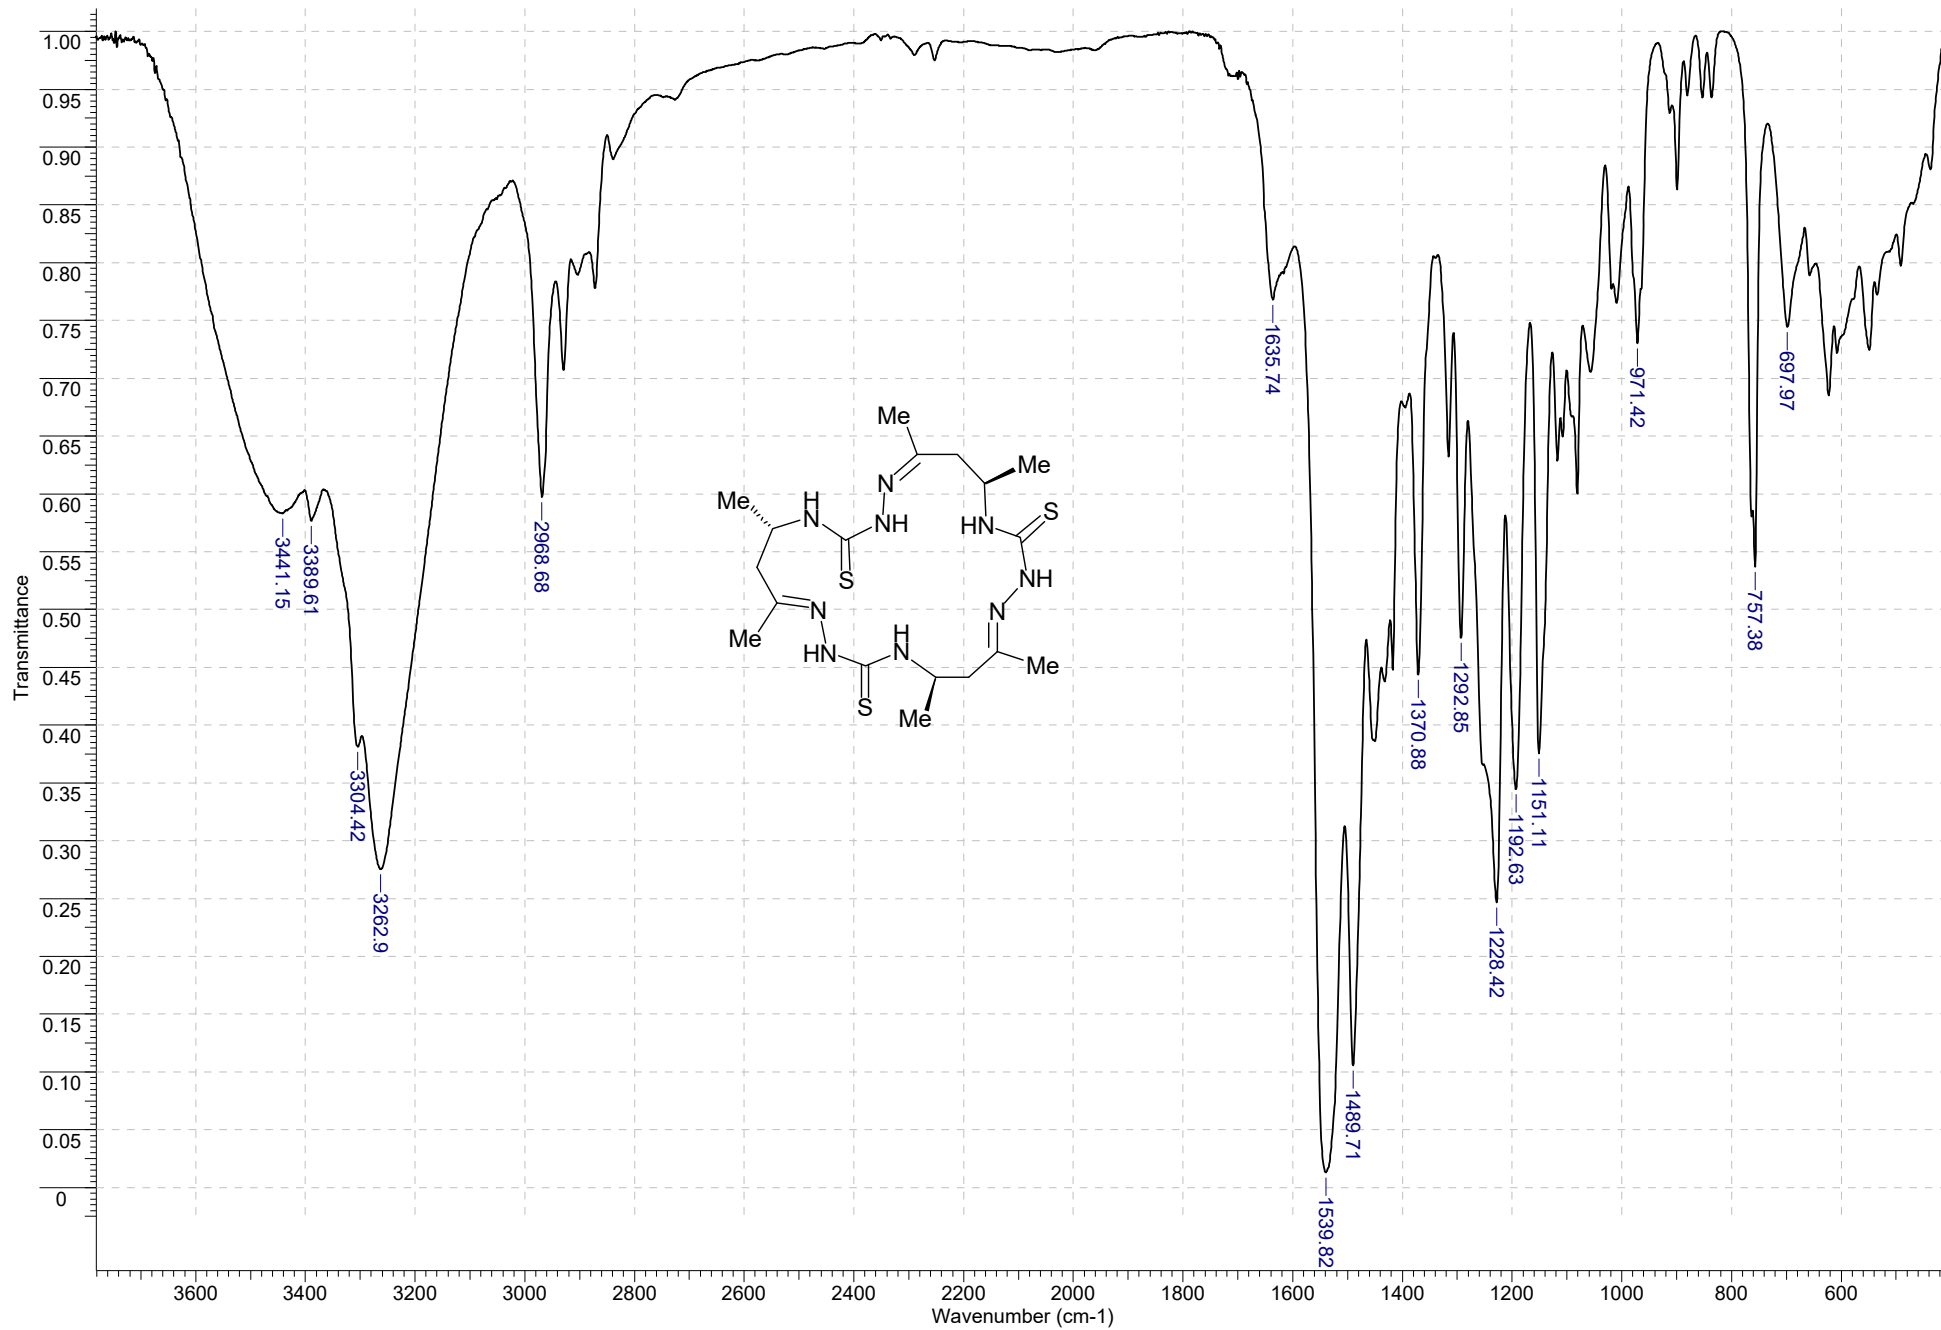

IR spectrum of 21-membered cyclic tris-thiosemicarbazone **7** after crystallization from DMF (KBr).

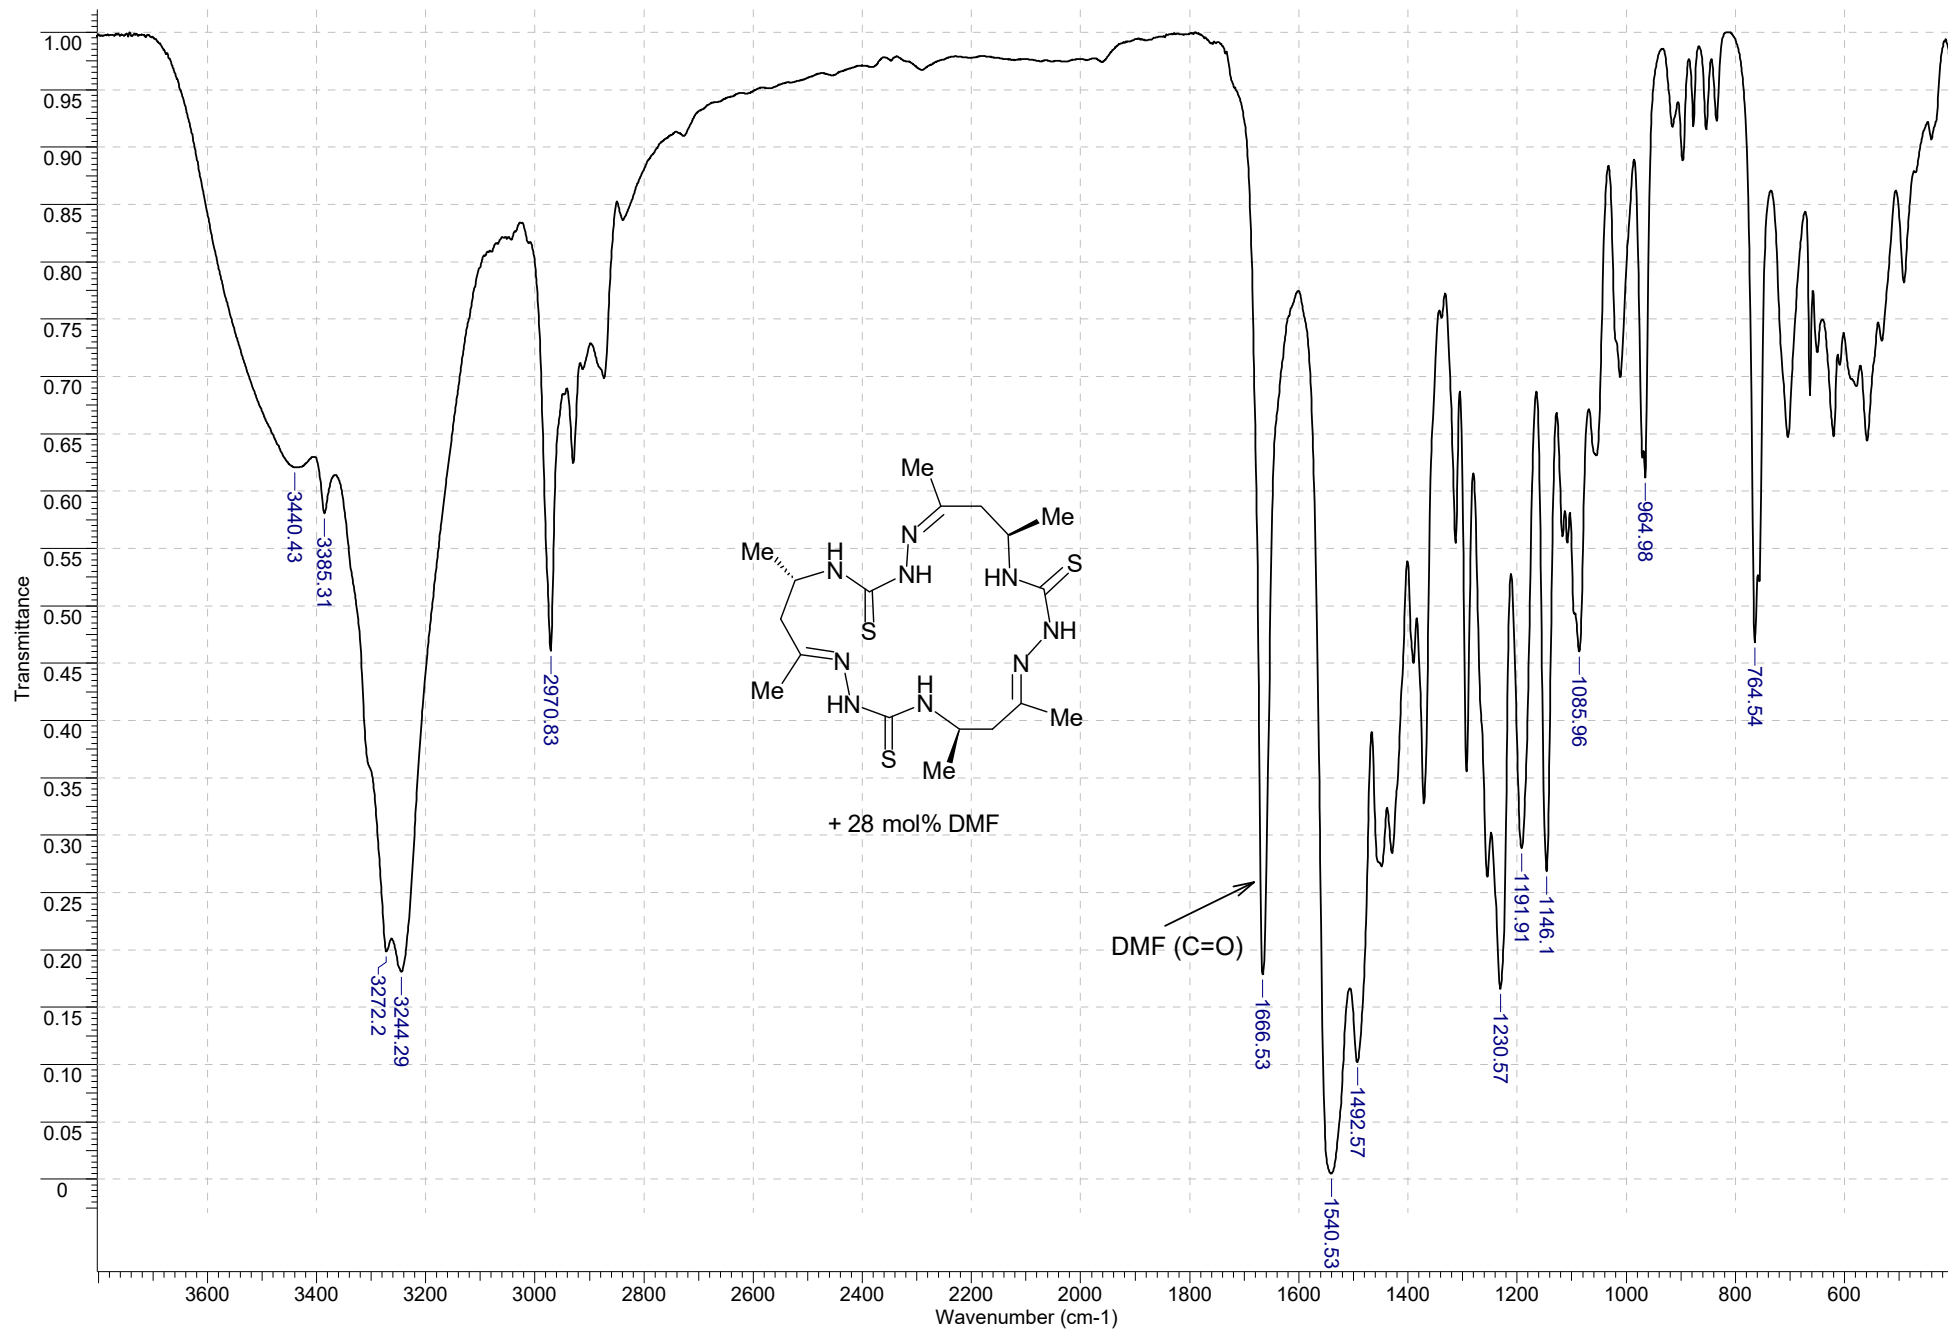

## X-ray diffraction data

Single crystals of macrocycle *cis*-**6** suitable for X-ray crystallographic analysis were obtained by recrystallization of a 80:20 mixture of *cis*- and *trans*-isomers of **6** from BuOH. Single crystals of DMF solvate of macrocycle **7**·(7·DMF) were formed by slow crystallization from a saturated solution in DMF (8.2 mg of **7** and 1.0 mL of DMF) at room temperature.

X-ray diffraction experiments were carried out on a Bruker KAPPA APEX II area-detector diffractometer.<sup>1</sup> Unit cell parameters were refined over the whole dataset together with data reduction.<sup>2</sup> Absorption corrections were introduced using the SADABS program.<sup>3</sup> The structures were solved by an intrinsic phasing method using the SHELXT program<sup>4</sup> and refined by full-matrix least-squares on  $F^2$  in the anisotropic approximation for all non-hydrogen atoms (except disordered C atoms of solvate DMF molecule in **7**) (SHELXL-2018<sup>5</sup>). The H atoms of CH, CH<sub>2</sub> and CH<sub>3</sub> groups were placed in geometrically calculated positions with isotropic temperature factors equal to  $1.2U_{eq}(C)$  for CH and CH<sub>2</sub> and  $1.5U_{eq}(C)$  for CH<sub>3</sub> groups, the orientation of CH<sub>3</sub> groups was refined. The H atoms of NH groups were objectively located from the difference Fourier synthesis and refined with isotropic temperature factors equal to  $1.2U_{eq}(N)$ . Crystal data, data collection and structure refinement details are summarized in Table 2.

**Table 2** Crystallographic data and details of data collection and structure refinement

| Compound                             | <b>6</b>                                                      | <b>7</b> ·DMF                                                    |
|--------------------------------------|---------------------------------------------------------------|------------------------------------------------------------------|
| CCDC deposition number               | 2361716                                                       | 2361717                                                          |
| Empirical formula                    | C <sub>12</sub> H <sub>22</sub> N <sub>6</sub> S <sub>2</sub> | C <sub>21</sub> H <sub>40</sub> N <sub>10</sub> S <sub>3</sub> O |
| <i>M</i>                             | 314.47                                                        | 544.81                                                           |
| <i>T</i> , K                         | 296(2)                                                        | 100(2)                                                           |
| Crystal system                       | monoclinic                                                    | monoclinic                                                       |
| Space group                          | <i>P</i> 2 <sub>1</sub> / <i>c</i>                            | <i>P</i> 2 <sub>1</sub> / <i>n</i>                               |
| <i>a</i> , Å                         | 9.7250(3)                                                     | 12.8167(4)                                                       |
| <i>b</i> , Å                         | 9.1469(2)                                                     | 11.8970(4)                                                       |
| <i>c</i> , Å                         | 18.4748(5)                                                    | 18.1261(6)                                                       |
| $\alpha$ , °                         | 90                                                            | 90                                                               |
| $\beta$ , °                          | 97.306(1)                                                     | 90.928(1)                                                        |
| $\gamma$ , °                         | 90                                                            | 90                                                               |
| <i>V</i> , Å <sup>3</sup> ; <i>Z</i> | 1630.06(8), 4                                                 | 2763.51(16), 4                                                   |
| $\rho_{calc.}$ , g/cm <sup>3</sup>   | 1.281                                                         | 1.309                                                            |



|                                                                                     |                                                                  |                                                                  |
|-------------------------------------------------------------------------------------|------------------------------------------------------------------|------------------------------------------------------------------|
| $\mu(\text{MoK}\alpha)$ , $\text{mm}^{-1}$                                          | 0.327                                                            | 0.303                                                            |
| Crystal size, $\text{mm}^3$                                                         | $0.4 \times 0.38 \times 0.34$                                    | $0.18 \times 0.16 \times 0.14$                                   |
| Radiation                                                                           | MoK $\alpha$ ( $\lambda = 0.71073$ )                             | MoK $\alpha$ ( $\lambda = 0.71073$ )                             |
| $2\theta_{\text{max}}$ , $^\circ$                                                   | 60                                                               | 60                                                               |
| Reflections collected                                                               | 31725                                                            | 100195                                                           |
| Independent reflections                                                             | 4733 [ $R_{\text{int}} = 0.0307$ , $R_{\text{sigma}} = 0.0236$ ] | 8049 [ $R_{\text{int}} = 0.1133$ , $R_{\text{sigma}} = 0.0616$ ] |
| Data/restraints/parameters                                                          | 4733/4/197                                                       | 8049/7/357                                                       |
| Final $R$ indexes [ $I \geq 2\sigma(I)$ ]                                           | $R_1 = 0.0604$ , $wR_2 = 0.1587$                                 | $R_1 = 0.0490$ , $wR_2 = 0.0867$                                 |
| Final $R$ indexes [all data]                                                        | $R_1 = 0.0764$ , $wR_2 = 0.1714$                                 | $R_1 = 0.0866$ , $wR_2 = 0.0980$                                 |
| $GOOF$                                                                              | 1.057                                                            | 1.041                                                            |
| $\Delta\rho_{\text{max}}$ and $\Delta\rho_{\text{min}}$ , $e \cdot \text{\AA}^{-3}$ | 0.63, -0.39                                                      | 0.53, -0.43                                                      |

## Structure 6

Bond lengths and bond angles in the structure **6** are given in Tables 3 and 4. The structure contains intramolecular H-bonds N-H...N (Fig. 1, Table 5). Intermolecular H-bonds N-H...S (Fig. 2, Table 5) link the molecules into the chains along the [100] direction.

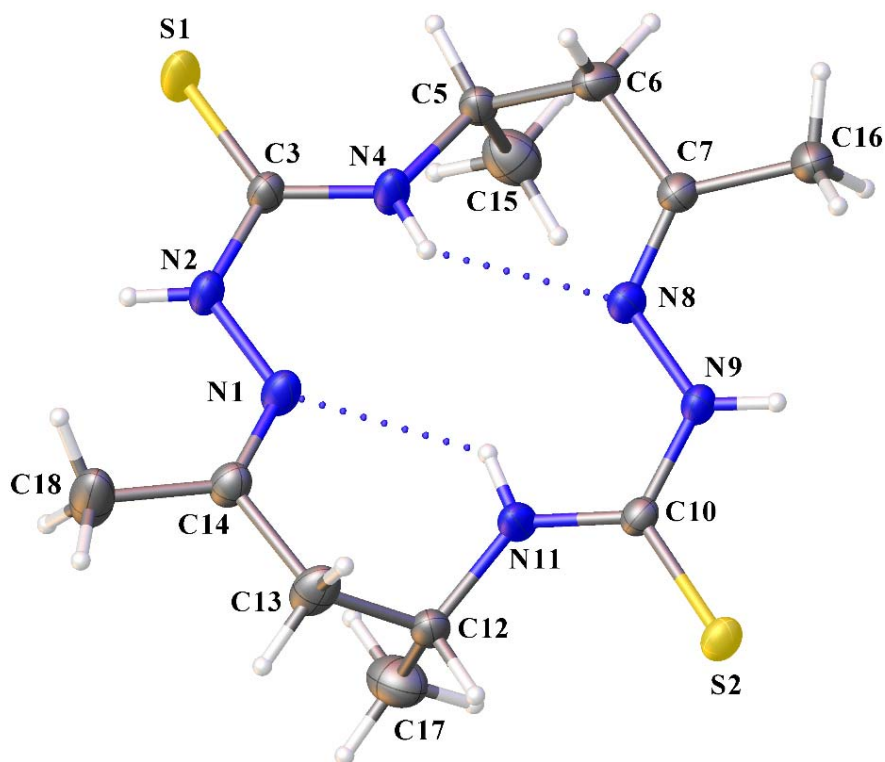

**Figure 1.** A view of **6**. Displacement ellipsoids are shown at 30% probability level.

Dotted lines indicate H-bonds.

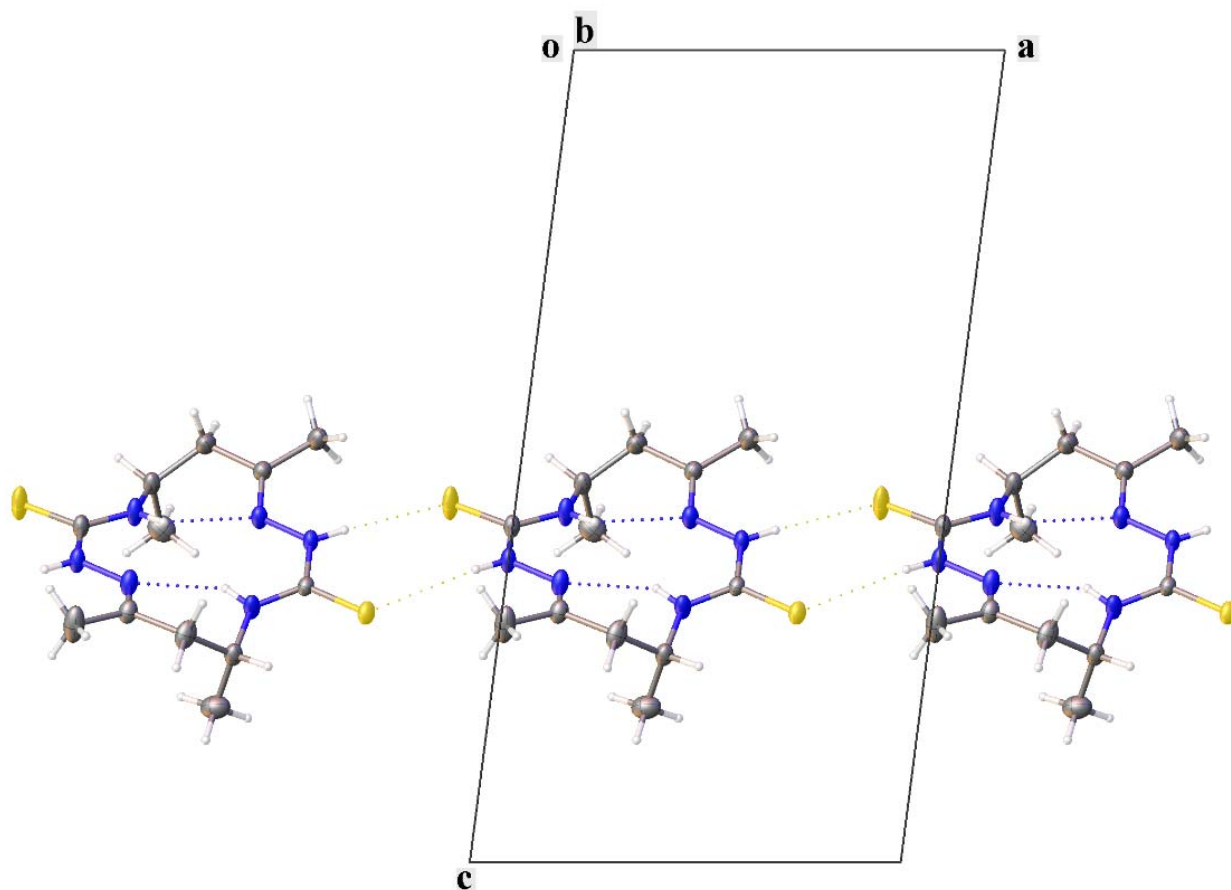

**Figure 2.** Chain formed by N-H...S bonds in the structure **6**. Dotted lines indicate H-bonds.

**Table 3** Bond lengths for **6**

| Atom | Atom | Length/Å |
|------|------|----------|
| S1   | C3   | 1.672(2) |
| S2   | C10  | 1.684(2) |
| N1   | N2   | 1.388(2) |
| N1   | C14  | 1.264(3) |
| N2   | C3   | 1.357(3) |
| N4   | C3   | 1.318(3) |
| N4   | C5   | 1.455(3) |
| N8   | N9   | 1.389(2) |
| N8   | C7   | 1.277(3) |
| N9   | C10  | 1.350(3) |

| Atom | Atom | Length/Å |
|------|------|----------|
| N11  | C10  | 1.317(3) |
| N11  | C12  | 1.452(3) |
| C5   | C6   | 1.531(3) |
| C5   | C15  | 1.497(4) |
| C6   | C7   | 1.510(3) |
| C7   | C16  | 1.473(3) |
| C12  | C13  | 1.501(4) |
| C12  | C17  | 1.514(4) |
| C13  | C14  | 1.512(3) |
| C14  | C18  | 1.490(4) |

**Table 4** Bond angles for **6**

| Atom | Atom | Atom | Angle/°    |
|------|------|------|------------|
| C14  | N1   | N2   | 120.43(19) |
| C3   | N2   | N1   | 118.28(18) |
| C3   | N4   | C5   | 127.17(19) |
| C7   | N8   | N9   | 120.02(18) |
| C10  | N9   | N8   | 118.98(17) |
| C10  | N11  | C12  | 128.19(18) |
| N2   | C3   | S1   | 120.12(16) |
| N4   | C3   | S1   | 123.59(17) |
| N4   | C3   | N2   | 116.26(18) |
| N4   | C5   | C6   | 109.6(2)   |
| N4   | C5   | C15  | 110.8(2)   |
| C15  | C5   | C6   | 112.5(2)   |
| C7   | C6   | C5   | 119.55(19) |

|     |     |     |            |
|-----|-----|-----|------------|
| N8  | C7  | C6  | 119.1(2)   |
| N8  | C7  | C16 | 125.2(2)   |
| C16 | C7  | C6  | 115.6(2)   |
| N9  | C10 | S2  | 120.27(15) |
| N11 | C10 | S2  | 123.53(16) |
| N11 | C10 | N9  | 116.20(18) |
| N11 | C12 | C13 | 111.3(2)   |
| N11 | C12 | C17 | 108.7(2)   |
| C13 | C12 | C17 | 113.0(2)   |
| C12 | C13 | C14 | 119.0(2)   |
| N1  | C14 | C13 | 118.8(2)   |
| N1  | C14 | C18 | 125.5(2)   |
| C18 | C14 | C13 | 115.6(2)   |
| N8  | C7  | C6  | 119.1(2)   |

**Table 5** Hydrogen bonds for **6**

| D   | H   | A               | d(D-H)/Å  | d(H-A)/Å  | d(D-A)/Å   | D-H-A/° |
|-----|-----|-----------------|-----------|-----------|------------|---------|
| N2  | H2  | S2 <sup>1</sup> | 0.819(17) | 2.732(18) | 3.5413(19) | 170(3)  |
| N4  | H4  | N8              | 0.845(18) | 2.19(3)   | 2.823(2)   | 132(3)  |
| N9  | H9  | S1 <sup>2</sup> | 0.825(17) | 2.655(18) | 3.4738(18) | 172(3)  |
| N11 | H11 | N1              | 0.836(18) | 2.26(3)   | 2.827(3)   | 125(3)  |

Symmetry transformations: 1 – (-1+x, y, z); 2 – (1+x, y, z).

### Structure 7

The structure **7** contains one solvate DMF molecule (Fig. 3). The CH and CH<sub>3</sub> groups of the DMF molecule are disordered by two positions with occupancies 0.87 and 0.13. Bond lengths and bond angles in the structure **7** are given in Tables 6 and 7. The structure contains one rather weak intramolecular H-bonds N-H...S (Fig. 3, Table 8). Solvate DMF molecules are linked with the molecule of **7** by H-bonds of N-H...O and CH...O types. The H-bonds of the C-H...N type link

molecules into the centrosymmetric dimers (Fig. 4, Table 8). Three NH groups do not participate in H-bonding.

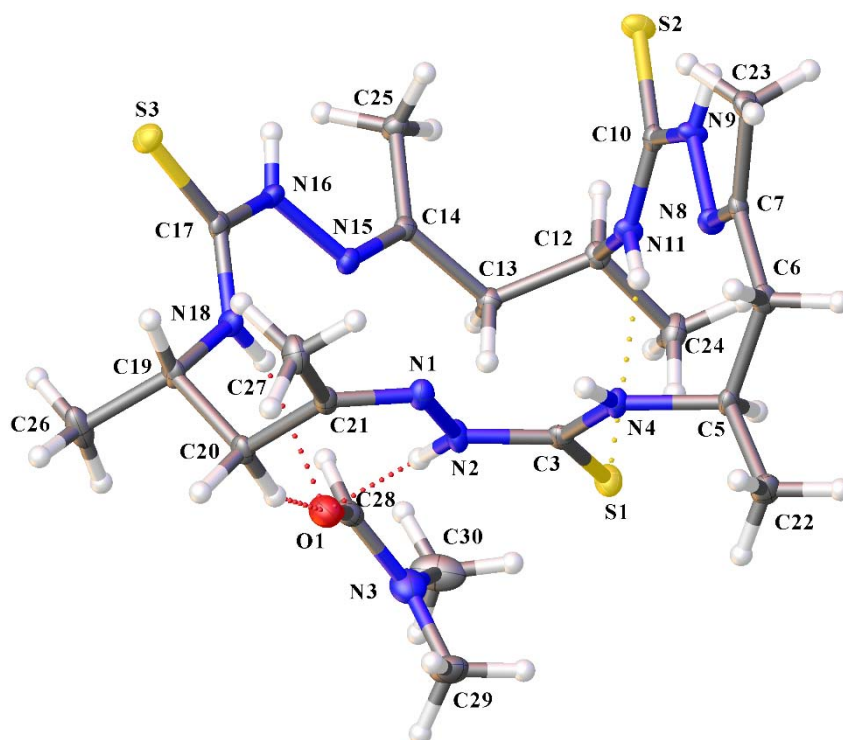

**Figure 3.** A view of 7. Displacement ellipsoids are shown at 50% probability level. Dotted lines indicate H-bonds. Only the main orientation of the solvate DMF molecule is shown.

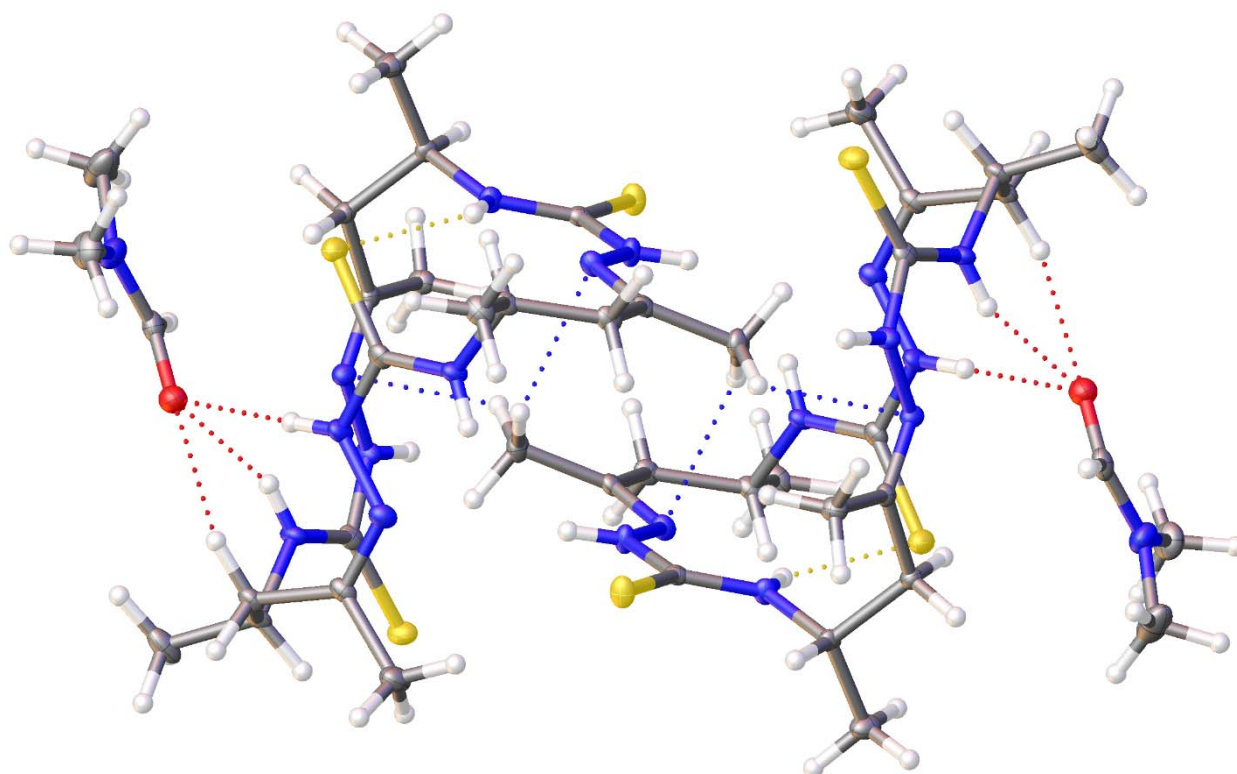

**Figure 4.** Centrosymmetric dimer formed by C-H...N bonds in the structure 7. Dotted lines indicate H-bonds.

**Table 6** Bond lengths for 7·DMF

| Atom | Atom | Length/Å   |
|------|------|------------|
| S2   | C10  | 1.6901(18) |
| S1   | C3   | 1.6952(19) |
| S3   | C17  | 1.6854(19) |
| O1   | C28  | 1.237(3)   |
| O1   | C28A | 1.221(8)   |
| N1   | N2   | 1.382(2)   |
| N1   | C21  | 1.282(2)   |
| N2   | C3   | 1.358(2)   |
| N3   | C28  | 1.347(3)   |
| N3   | C29  | 1.410(3)   |
| N3   | C30  | 1.482(3)   |
| N3   | C28A | 1.406(8)   |
| N3   | C29A | 1.324(8)   |
| N3   | C30A | 1.557(8)   |
| N4   | C3   | 1.328(2)   |
| N4   | C5   | 1.462(2)   |
| N8   | N9   | 1.387(2)   |
| N8   | C7   | 1.280(2)   |
| N9   | C10  | 1.358(2)   |

| Atom | Atom | Length/Å |
|------|------|----------|
| N11  | C10  | 1.332(2) |
| N11  | C12  | 1.463(2) |
| N15  | N16  | 1.388(2) |
| N15  | C14  | 1.283(2) |
| N16  | C17  | 1.373(2) |
| N18  | C17  | 1.328(2) |
| N18  | C19  | 1.469(2) |
| C5   | C6   | 1.523(3) |
| C5   | C22  | 1.526(3) |
| C6   | C7   | 1.501(2) |
| C7   | C23  | 1.496(2) |
| C12  | C13  | 1.532(2) |
| C12  | C24  | 1.524(3) |
| C13  | C14  | 1.504(2) |
| C14  | C25  | 1.500(2) |
| C19  | C20  | 1.542(3) |
| C19  | C26  | 1.523(3) |
| C20  | C21  | 1.499(3) |
| C21  | C27  | 1.502(3) |

**Table 7** Bond angles for 7·DMF

| Atom | Atom | Atom | Angle/°    |
|------|------|------|------------|
| C21  | N1   | N2   | 119.85(16) |
| C3   | N2   | N1   | 117.57(16) |
| C28  | N3   | C29  | 123.63(19) |
| C28  | N3   | C30  | 117.72(19) |
| C29  | N3   | C30  | 118.4(2)   |
| C28A | N3   | C30A | 106.5(6)   |

| Atom | Atom | Atom | Angle/°    |
|------|------|------|------------|
| C23  | C7   | C6   | 116.97(15) |
| N9   | C10  | S2   | 117.33(13) |
| N11  | C10  | S2   | 125.92(14) |
| N11  | C10  | N9   | 116.73(16) |
| N11  | C12  | C13  | 111.87(14) |
| N11  | C12  | C24  | 108.67(15) |

| Atom | Atom | Atom | Angle/°    |
|------|------|------|------------|
| C29A | N3   | C28A | 127.9(7)   |
| C29A | N3   | C30A | 119.8(7)   |
| C3   | N4   | C5   | 125.80(16) |
| C7   | N8   | N9   | 115.39(15) |
| C10  | N9   | N8   | 120.45(15) |
| C10  | N11  | C12  | 125.40(15) |
| C14  | N15  | N16  | 117.72(15) |
| C17  | N16  | N15  | 117.46(15) |
| C17  | N18  | C19  | 124.78(16) |
| N2   | C3   | S1   | 119.51(14) |
| N4   | C3   | S1   | 124.44(14) |
| N4   | C3   | N2   | 116.04(16) |
| N4   | C5   | C6   | 108.87(15) |
| N4   | C5   | C22  | 109.34(15) |
| C6   | C5   | C22  | 110.79(15) |
| C7   | C6   | C5   | 115.76(15) |
| N8   | C7   | C6   | 118.82(16) |
| N8   | C7   | C23  | 124.20(16) |

| Atom | Atom | Atom | Angle/°    |
|------|------|------|------------|
| C24  | C12  | C13  | 109.68(15) |
| C14  | C13  | C12  | 115.06(15) |
| N15  | C14  | C13  | 115.52(16) |
| N15  | C14  | C25  | 125.67(16) |
| C25  | C14  | C13  | 118.81(15) |
| N16  | C17  | S3   | 118.51(14) |
| N18  | C17  | S3   | 125.54(14) |
| N18  | C17  | N16  | 115.95(16) |
| N18  | C19  | C20  | 109.86(15) |
| N18  | C19  | C26  | 110.41(15) |
| C26  | C19  | C20  | 110.57(15) |
| C21  | C20  | C19  | 114.08(15) |
| N1   | C21  | C20  | 127.51(18) |
| N1   | C21  | C27  | 115.28(17) |
| C20  | C21  | C27  | 117.19(16) |
| O1   | C28  | N3   | 124.3(2)   |
| O1   | C28A | N3   | 120.7(8)   |

**Table 8** Hydrogen bonds for 7·DMF

| D   | H    | A                | d(D-H)/Å | d(H-A)/Å | d(D-A)/Å   | D-H-A/°   |
|-----|------|------------------|----------|----------|------------|-----------|
| N2  | H2   | O1               | 0.86(2)  | 2.15(2)  | 3.009(2)   | 178(2)    |
| N11 | H11  | S1               | 0.84(2)  | 2.80(2)  | 3.5602(16) | 151.5(18) |
| N18 | H18  | O1               | 0.84(2)  | 2.20(2)  | 2.965(2)   | 151.4(19) |
| C20 | H20B | O1               | 0.99     | 2.35     | 3.208(2)   | 144       |
| C23 | H23A | N8 <sup>1</sup>  | 0.98     | 2.63     | 3.441(2)   | 141       |
| C23 | H23C | N15 <sup>1</sup> | 0.98     | 2.50     | 3.249(2)   | 133       |

Symmetry transformation: 1 – (-x, 1-y, 1-z).

## Computational details

The geometry optimizations were carried out at the B3LYP level of theory using Gaussian 16 suite<sup>6</sup> of quantum chemical programs. Pople's basis sets, 6-311++G(d,p), was employed for geometry optimization. The effect of continuum solvation was incorporated by using the polarizable continuum model (PCM). Enthalpies and Gibbs free energies were obtained by adding unscaled zero-point vibrational energy corrections (ZPVE) and thermal contributions to the energies (temperature 298.150 Kelvin, pressure 1.000 atm). The calculations of carbon chemical shifts were performed by the GIAO method at the WC04/6-311+G(2d,p) level of theory (DMSO solution; PCM) using the DFT B3LYP/6-311++G(d,p) optimized geometries (DMSO solution; PCM).

### Computational data for the starting materials

#### Hydrazone 5

##### DMSO solution

*Computational data for various conformers of hydrazone (E)-5*

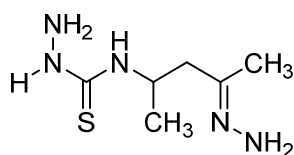

**Data 1:** Cartesian coordinates and energies of the optimized geometry for the conformer A of (E)-5 in DMSO solution.

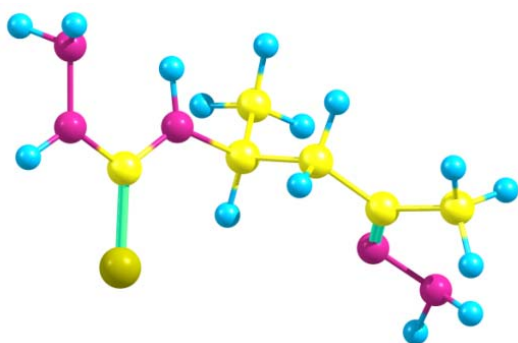

|                                              |                             |
|----------------------------------------------|-----------------------------|
| Electronic Energy =                          | -909.774389855 a.u.         |
| Zero-point correction=                       | 0.228960 (Hartree/Particle) |
| Thermal correction to Energy=                | 0.243947                    |
| Thermal correction to Enthalpy=              | 0.244891                    |
| Thermal correction to Gibbs Free Energy=     | 0.185498                    |
| Sum of electronic and zero-point Energies=   | -909.545430                 |
| Sum of electronic and thermal Energies=      | -909.530443                 |
| Sum of electronic and thermal Enthalpies=    | -909.529499                 |
| Sum of electronic and thermal Free Energies= | -909.588892                 |

Standard orientation:

| Center Number | Atomic Number | Atomic Type | Coordinates (Angstroms) |           |           |
|---------------|---------------|-------------|-------------------------|-----------|-----------|
|               |               |             | X                       | Y         | Z         |
| 1             | 7             | 0           | 3.801359                | -1.280779 | 0.512571  |
| 2             | 7             | 0           | 3.409616                | 0.061015  | 0.377026  |
| 3             | 6             | 0           | 2.147279                | 0.392353  | -0.002928 |
| 4             | 16            | 0           | 1.746377                | 2.046872  | -0.177450 |
| 5             | 7             | 0           | 1.312114                | -0.629331 | -0.214585 |
| 6             | 6             | 0           | -0.106535               | -0.546589 | -0.581969 |
| 7             | 6             | 0           | -0.977496               | -0.581713 | 0.686364  |
| 8             | 6             | 0           | -2.421243               | -0.161147 | 0.525790  |
| 9             | 7             | 0           | -2.812857               | 0.312515  | -0.597287 |
| 10            | 6             | 0           | -3.316072               | -0.309467 | 1.732065  |
| 11            | 7             | 0           | -4.154269               | 0.665222  | -0.730532 |
| 12            | 1             | 0           | 4.138116                | -1.445089 | 1.456765  |
| 13            | 1             | 0           | 4.548425                | -1.490945 | -0.143507 |
| 14            | 1             | 0           | 4.072758                | 0.812447  | 0.508223  |
| 15            | 1             | 0           | 1.715720                | -1.546703 | -0.047828 |
| 16            | 1             | 0           | -4.240784               | 1.322209  | -1.495411 |
| 17            | 1             | 0           | -4.574859               | 1.060755  | 0.108481  |
| 18            | 1             | 0           | -0.247881               | 0.412861  | -1.076739 |
| 19            | 1             | 0           | -0.951864               | -1.590599 | 1.119258  |
| 20            | 1             | 0           | -0.524453               | 0.073150  | 1.441219  |
| 21            | 1             | 0           | -4.197157               | -0.913385 | 1.489524  |
| 22            | 1             | 0           | -2.788325               | -0.784187 | 2.559051  |
| 23            | 1             | 0           | -3.677834               | 0.664354  | 2.083778  |
| 24            | 6             | 0           | -0.423920               | -1.681437 | -1.557715 |
| 25            | 1             | 0           | 0.186338                | -1.597719 | -2.460143 |
| 26            | 1             | 0           | -0.229291               | -2.656927 | -1.099540 |
| 27            | 1             | 0           | -1.474763               | -1.642671 | -1.843915 |

**Data 2:** Cartesian coordinates and energies of the optimized geometry for the conformer **B** of (*E*)-5 in DMSO solution.

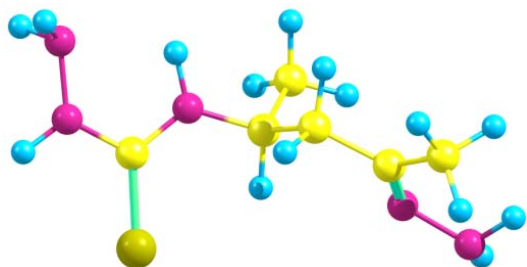

|                                              |                             |
|----------------------------------------------|-----------------------------|
| Electronic Energy =                          | -909.774321348 a.u.         |
| Zero-point correction=                       | 0.229015 (Hartree/Particle) |
| Thermal correction to Energy=                | 0.243985                    |
| Thermal correction to Enthalpy=              | 0.244929                    |
| Thermal correction to Gibbs Free Energy=     | 0.185557                    |
| Sum of electronic and zero-point Energies=   | -909.545307                 |
| Sum of electronic and thermal Energies=      | -909.530336                 |
| Sum of electronic and thermal Enthalpies=    | -909.529392                 |
| Sum of electronic and thermal Free Energies= | -909.588764                 |

Standard orientation:

| Center Number | Atomic Number | Atomic Type | Coordinates (Angstroms) |           |           |
|---------------|---------------|-------------|-------------------------|-----------|-----------|
|               |               |             | X                       | Y         | Z         |
| 1             | 7             | 0           | 3.788349                | 1.322209  | -0.479348 |
| 2             | 7             | 0           | 3.412497                | -0.027375 | -0.381065 |
| 3             | 6             | 0           | 2.154709                | -0.384153 | -0.009075 |
| 4             | 16            | 0           | 1.775051                | -2.047567 | 0.122628  |
| 5             | 7             | 0           | 1.306940                | 0.621220  | 0.229124  |



|    |   |   |           |           |           |
|----|---|---|-----------|-----------|-----------|
| 6  | 6 | 0 | -0.110278 | 0.511243  | 0.594349  |
| 7  | 6 | 0 | -0.982616 | 0.597015  | -0.670606 |
| 8  | 6 | 0 | -2.426011 | 0.169392  | -0.524821 |
| 9  | 7 | 0 | -2.806578 | -0.380166 | 0.566933  |
| 10 | 6 | 0 | -3.327541 | 0.385402  | -1.715905 |
| 11 | 7 | 0 | -4.116401 | -0.847725 | 0.647801  |
| 12 | 1 | 0 | 4.124218  | 1.516269  | -1.418181 |
| 13 | 1 | 0 | 4.532098  | 1.523319  | 0.183323  |
| 14 | 1 | 0 | 4.085303  | -0.766968 | -0.529230 |
| 15 | 1 | 0 | 1.699028  | 1.547648  | 0.086181  |
| 16 | 1 | 0 | -4.378772 | -0.908005 | 1.623392  |
| 17 | 1 | 0 | -4.800438 | -0.286467 | 0.143707  |
| 18 | 1 | 0 | -0.243043 | -0.470939 | 1.044568  |
| 19 | 1 | 0 | -0.957930 | 1.622179  | -1.062925 |
| 20 | 1 | 0 | -0.530241 | -0.027527 | -1.451566 |
| 21 | 1 | 0 | -4.134711 | 1.090742  | -1.483325 |
| 22 | 1 | 0 | -2.771683 | 0.787321  | -2.562896 |
| 23 | 1 | 0 | -3.797152 | -0.554873 | -2.023889 |
| 24 | 6 | 0 | -0.435474 | 1.597844  | 1.621291  |
| 25 | 1 | 0 | 0.175564  | 1.476734  | 2.518892  |
| 26 | 1 | 0 | -0.247442 | 2.594637  | 1.208642  |
| 27 | 1 | 0 | -1.485990 | 1.539394  | 1.905752  |

**Data 3:** Cartesian coordinates and energies of the optimized geometry for the conformer C of (*E*)-5 in DMSO solution.

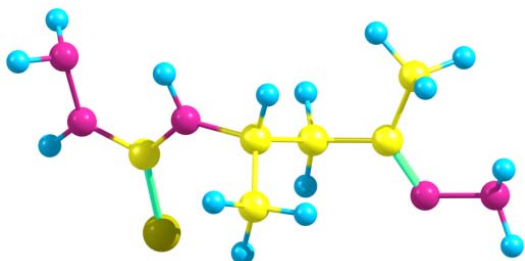

|                                              |                             |
|----------------------------------------------|-----------------------------|
| Electronic Energy =                          | -909.768992727 a.u.         |
| Zero-point correction=                       | 0.229272 (Hartree/Particle) |
| Thermal correction to Energy=                | 0.244166                    |
| Thermal correction to Enthalpy=              | 0.245110                    |
| Thermal correction to Gibbs Free Energy=     | 0.186273                    |
| Sum of electronic and zero-point Energies=   | -909.539721                 |
| Sum of electronic and thermal Energies=      | -909.524827                 |
| Sum of electronic and thermal Enthalpies=    | -909.523883                 |
| Sum of electronic and thermal Free Energies= | -909.582719                 |

Standard orientation:

| Center Number | Atomic Number | Atomic Type | Coordinates (Angstroms) |           |           |
|---------------|---------------|-------------|-------------------------|-----------|-----------|
|               |               |             | X                       | Y         | Z         |
| 1             | 7             | 0           | 3.757262                | -1.612015 | -0.226539 |
| 2             | 7             | 0           | 3.453295                | -0.245597 | -0.331330 |
| 3             | 6             | 0           | 2.198927                | 0.225823  | -0.087623 |
| 4             | 16            | 0           | 1.928575                | 1.905905  | -0.258366 |
| 5             | 7             | 0           | 1.301462                | -0.701567 | 0.266874  |
| 6             | 6             | 0           | -0.126690               | -0.566257 | 0.611573  |
| 7             | 6             | 0           | -0.968493               | -0.088315 | -0.597100 |
| 8             | 6             | 0           | -2.453119               | -0.276807 | -0.404452 |
| 9             | 7             | 0           | -3.178778               | 0.779892  | -0.341915 |
| 10            | 6             | 0           | -3.012769               | -1.676342 | -0.326375 |
| 11            | 7             | 0           | -4.556405               | 0.623454  | -0.233563 |
| 12            | 1             | 0           | 4.489567                | -1.750313 | 0.463977  |
| 13            | 1             | 0           | 4.079875                | -1.964318 | -1.123381 |
| 14            | 1             | 0           | 4.155236                | 0.424091  | -0.615399 |

|    |   |   |           |           |           |
|----|---|---|-----------|-----------|-----------|
| 15 | 1 | 0 | 1.691039  | -1.638974 | 0.297757  |
| 16 | 1 | 0 | -4.954078 | 1.476333  | 0.138140  |
| 17 | 1 | 0 | -4.855598 | -0.171490 | 0.327738  |
| 18 | 1 | 0 | -0.421998 | -1.595120 | 0.832083  |
| 19 | 1 | 0 | -0.762844 | 0.962941  | -0.794513 |
| 20 | 1 | 0 | -0.649506 | -0.665166 | -1.473530 |
| 21 | 1 | 0 | -3.817090 | -1.807551 | -1.058420 |
| 22 | 1 | 0 | -2.245315 | -2.424682 | -0.523748 |
| 23 | 1 | 0 | -3.439462 | -1.889581 | 0.661486  |
| 24 | 6 | 0 | -0.355981 | 0.259415  | 1.881571  |
| 25 | 1 | 0 | -1.409638 | 0.212232  | 2.165963  |
| 26 | 1 | 0 | 0.238057  | -0.141128 | 2.706521  |
| 27 | 1 | 0 | -0.084547 | 1.303970  | 1.728927  |

**Data 4:** Cartesian coordinates and energies of the optimized geometry for the conformer **D** of (*E*)-**5** in DMSO solution.

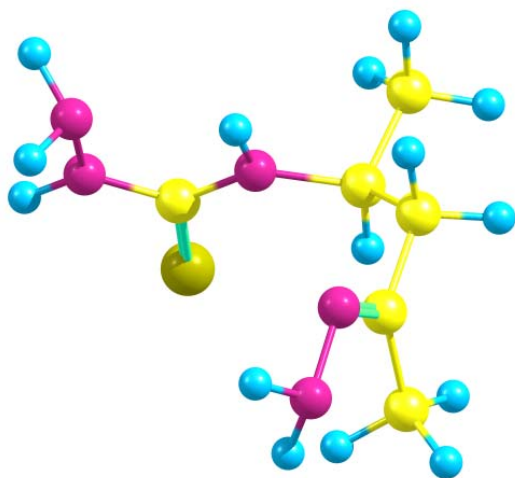

|                                              |                             |
|----------------------------------------------|-----------------------------|
| Electronic Energy =                          | -909.776381173 a.u.         |
| Zero-point correction=                       | 0.229267 (Hartree/Particle) |
| Thermal correction to Energy=                | 0.244127                    |
| Thermal correction to Enthalpy=              | 0.245071                    |
| Thermal correction to Gibbs Free Energy=     | 0.185923                    |
| Sum of electronic and zero-point Energies=   | -909.547114                 |
| Sum of electronic and thermal Energies=      | -909.532255                 |
| Sum of electronic and thermal Enthalpies=    | -909.531310                 |
| Sum of electronic and thermal Free Energies= | -909.590458                 |

Standard orientation:

| Center Number | Atomic Number | Atomic Type | Coordinates (Angstroms) |           |           |
|---------------|---------------|-------------|-------------------------|-----------|-----------|
|               |               |             | X                       | Y         | Z         |
| 1             | 7             | 0           | 1.940987                | -2.146246 | -1.314572 |
| 2             | 7             | 0           | 2.296498                | -1.478268 | -0.131565 |
| 3             | 6             | 0           | 1.700488                | -0.310877 | 0.226271  |
| 4             | 16            | 0           | 2.176976                | 0.442689  | 1.687436  |
| 5             | 7             | 0           | 0.771751                | 0.153253  | -0.615483 |
| 6             | 6             | 0           | 0.022322                | 1.406290  | -0.496205 |
| 7             | 6             | 0           | -1.448368               | 1.163640  | -0.895720 |
| 8             | 6             | 0           | -2.184080               | 0.196581  | -0.002512 |
| 9             | 7             | 0           | -2.552674               | -0.918407 | -0.518956 |
| 10            | 6             | 0           | -2.461243               | 0.588897  | 1.427405  |
| 11            | 7             | 0           | -3.281343               | -1.798976 | 0.273929  |
| 12            | 1             | 0           | 1.574227                | -3.067789 | -1.093804 |
| 13            | 1             | 0           | 2.758907                | -2.251448 | -1.907897 |
| 14            | 1             | 0           | 2.990040                | -1.862416 | 0.495317  |
| 15            | 1             | 0           | 0.628391                | -0.418334 | -1.443578 |
| 16            | 1             | 0           | -3.208468               | -2.728541 | -0.118924 |

|    |   |   |           |           |           |
|----|---|---|-----------|-----------|-----------|
| 17 | 1 | 0 | -3.010198 | -1.816617 | 1.255194  |
| 18 | 1 | 0 | 0.075996  | 1.695362  | 0.554022  |
| 19 | 1 | 0 | -1.956166 | 2.134563  | -0.872418 |
| 20 | 1 | 0 | -1.491818 | 0.798727  | -1.926170 |
| 21 | 1 | 0 | -1.920843 | -0.050889 | 2.135419  |
| 22 | 1 | 0 | -2.164830 | 1.619419  | 1.622225  |
| 23 | 1 | 0 | -3.528804 | 0.488090  | 1.651298  |
| 24 | 6 | 0 | 0.660544  | 2.510449  | -1.347081 |
| 25 | 1 | 0 | 1.699788  | 2.668559  | -1.051288 |
| 26 | 1 | 0 | 0.638800  | 2.248191  | -2.408938 |
| 27 | 1 | 0 | 0.118854  | 3.450733  | -1.215858 |

**Data 5:** Cartesian coordinates and energies of the optimized geometry for the conformer **E** of (*E*)-**5** in DMSO solution.

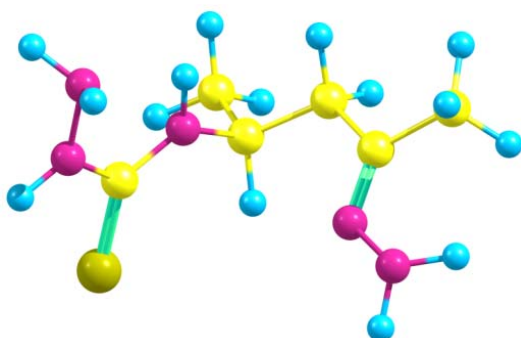

|                                              |                             |
|----------------------------------------------|-----------------------------|
| Electronic Energy =                          | -909.774093233 a.u.         |
| Zero-point correction=                       | 0.228990 (Hartree/Particle) |
| Thermal correction to Energy=                | 0.243930                    |
| Thermal correction to Enthalpy=              | 0.244874                    |
| Thermal correction to Gibbs Free Energy=     | 0.185809                    |
| Sum of electronic and zero-point Energies=   | -909.545103                 |
| Sum of electronic and thermal Energies=      | -909.530163                 |
| Sum of electronic and thermal Enthalpies=    | -909.529219                 |
| Sum of electronic and thermal Free Energies= | -909.588284                 |

Standard orientation:

| Center Number | Atomic Number | Atomic Type | Coordinates (Angstroms) |           |           |
|---------------|---------------|-------------|-------------------------|-----------|-----------|
|               |               |             | X                       | Y         | Z         |
| 1             | 7             | 0           | -2.103182               | -1.357175 | 2.083109  |
| 2             | 7             | 0           | -2.484797               | -1.135143 | 0.750083  |
| 3             | 6             | 0           | -1.800715               | -0.268436 | -0.044399 |
| 4             | 16            | 0           | -2.303505               | -0.070660 | -1.668664 |
| 5             | 7             | 0           | -0.775650               | 0.365010  | 0.528940  |
| 6             | 6             | 0           | 0.096405                | 1.369388  | -0.089778 |
| 7             | 6             | 0           | 1.505678                | 1.251798  | 0.501120  |
| 8             | 6             | 0           | 2.320048                | 0.035153  | 0.118231  |
| 9             | 7             | 0           | 1.879961                | -0.748054 | -0.793078 |
| 10            | 6             | 0           | 3.632642                | -0.164692 | 0.835658  |
| 11            | 7             | 0           | 2.628744                | -1.879788 | -1.104642 |
| 12            | 1             | 0           | -1.841223               | -2.330678 | 2.210583  |
| 13            | 1             | 0           | -2.879107               | -1.142080 | 2.702376  |
| 14            | 1             | 0           | -3.249921               | -1.648552 | 0.334882  |
| 15            | 1             | 0           | -0.633236               | 0.135425  | 1.508338  |
| 16            | 1             | 0           | 2.371013                | -2.193731 | -2.031501 |
| 17            | 1             | 0           | 3.637801                | -1.751759 | -1.053567 |
| 18            | 1             | 0           | 0.128444                | 1.140565  | -1.154191 |
| 19            | 1             | 0           | 2.074790                | 2.143048  | 0.208565  |
| 20            | 1             | 0           | 1.447899                | 1.304974  | 1.596974  |
| 21            | 1             | 0           | 4.480218                | -0.116101 | 0.141332  |
| 22            | 1             | 0           | 3.786899                | 0.598205  | 1.598619  |
| 23            | 1             | 0           | 3.665737                | -1.148150 | 1.317207  |
| 24            | 6             | 0           | -0.472145               | 2.780412  | 0.111175  |
| 25            | 1             | 0           | -1.488029               | 2.841449  | -0.283836 |

|    |   |   |           |          |           |
|----|---|---|-----------|----------|-----------|
| 26 | 1 | 0 | -0.496209 | 3.046072 | 1.172413  |
| 27 | 1 | 0 | 0.143997  | 3.516194 | -0.412491 |

**Data 6:** Cartesian coordinates and energies of the optimized geometry for the conformer **F** of (*E*)-**5** in DMSO solution.

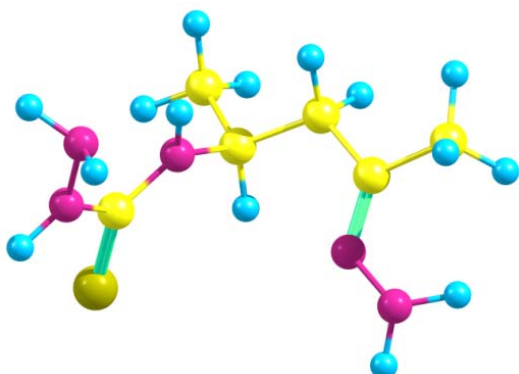

|                                              |                             |
|----------------------------------------------|-----------------------------|
| Electronic Energy =                          | -909.775823758 a.u.         |
| Zero-point correction=                       | 0.229322 (Hartree/Particle) |
| Thermal correction to Energy=                | 0.244186                    |
| Thermal correction to Enthalpy=              | 0.245130                    |
| Thermal correction to Gibbs Free Energy=     | 0.186146                    |
| Sum of electronic and zero-point Energies=   | -909.546502                 |
| Sum of electronic and thermal Energies=      | -909.531638                 |
| Sum of electronic and thermal Enthalpies=    | -909.530694                 |
| Sum of electronic and thermal Free Energies= | -909.589678                 |

Standard orientation:

| Center Number | Atomic Number | Atomic Type | Coordinates (Angstroms) |           |           |
|---------------|---------------|-------------|-------------------------|-----------|-----------|
|               |               |             | X                       | Y         | Z         |
| 1             | 7             | 0           | -3.620096               | -1.623648 | -0.616801 |
| 2             | 7             | 0           | -3.431098               | -0.243156 | -0.441602 |
| 3             | 6             | 0           | -2.240410               | 0.256825  | -0.019324 |
| 4             | 16            | 0           | -2.086168               | 1.946350  | 0.202304  |
| 5             | 7             | 0           | -1.272676               | -0.640938 | 0.195817  |
| 6             | 6             | 0           | 0.110619                | -0.363931 | 0.588899  |
| 7             | 6             | 0           | 1.015287                | -0.327488 | -0.668341 |
| 8             | 6             | 0           | 2.428296                | 0.123597  | -0.395749 |
| 9             | 7             | 0           | 3.368247                | -0.730963 | -0.577470 |
| 10            | 6             | 0           | 2.666932                | 1.546642  | 0.045454  |
| 11            | 7             | 0           | 4.680905                | -0.309693 | -0.395885 |
| 12            | 1             | 0           | -3.905877               | -1.811173 | -1.573375 |
| 13            | 1             | 0           | -4.344475               | -1.956080 | 0.013609  |
| 14            | 1             | 0           | -4.192457               | 0.407925  | -0.576247 |
| 15            | 1             | 0           | -1.534795               | -1.601839 | -0.006431 |
| 16            | 1             | 0           | 5.265188                | -1.119708 | -0.234126 |
| 17            | 1             | 0           | 4.815147                | 0.369578  | 0.350622  |
| 18            | 1             | 0           | 0.102509                | 0.623834  | 1.050910  |
| 19            | 1             | 0           | 1.041589                | -1.321100 | -1.123559 |
| 20            | 1             | 0           | 0.555133                | 0.360567  | -1.387002 |
| 21            | 1             | 0           | 3.392334                | 2.035066  | -0.614330 |
| 22            | 1             | 0           | 1.744701                | 2.127046  | 0.031967  |
| 23            | 1             | 0           | 3.075028                | 1.592712  | 1.062590  |
| 24            | 6             | 0           | 0.561192                | -1.404200 | 1.615424  |
| 25            | 1             | 0           | -0.081291               | -1.377363 | 2.498262  |
| 26            | 1             | 0           | 0.529808                | -2.413829 | 1.193686  |
| 27            | 1             | 0           | 1.587683                | -1.207115 | 1.929964  |

Computational data for various conformers of hydrazone (Z)-5

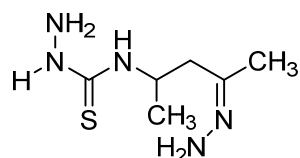

**Data 7:** Cartesian coordinates and energies of the optimized geometry for the conformer A of (Z)-5 in DMSO solution.

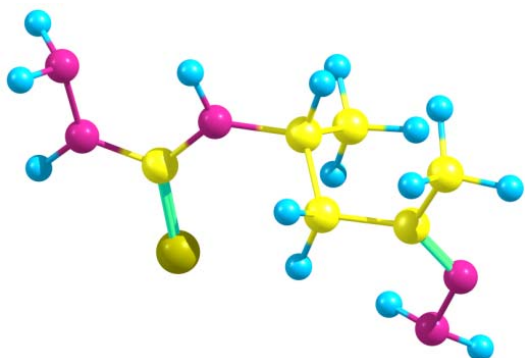

|                                              |                             |
|----------------------------------------------|-----------------------------|
| Electronic Energy =                          | -909.767048550 a.u.         |
| Zero-point correction=                       | 0.229417 (Hartree/Particle) |
| Thermal correction to Energy=                | 0.244318                    |
| Thermal correction to Enthalpy=              | 0.245262                    |
| Thermal correction to Gibbs Free Energy=     | 0.186072                    |
| Sum of electronic and zero-point Energies=   | -909.537632                 |
| Sum of electronic and thermal Energies=      | -909.522731                 |
| Sum of electronic and thermal Enthalpies=    | -909.521787                 |
| Sum of electronic and thermal Free Energies= | -909.580976                 |

Standard orientation:

| Center Number | Atomic Number | Atomic Type | Coordinates (Angstroms) |           |           |
|---------------|---------------|-------------|-------------------------|-----------|-----------|
|               |               |             | X                       | Y         | Z         |
| 1             | 7             | 0           | -3.738815               | -1.451804 | -0.244865 |
| 2             | 7             | 0           | -3.308706               | -0.117876 | -0.323515 |
| 3             | 6             | 0           | -2.015615               | 0.227151  | -0.076582 |
| 4             | 16            | 0           | -1.584320               | 1.877067  | -0.214460 |
| 5             | 7             | 0           | -1.207691               | -0.788056 | 0.254325  |
| 6             | 6             | 0           | 0.226242                | -0.784817 | 0.596508  |
| 7             | 6             | 0           | 0.525184                | -0.005394 | 1.881829  |
| 8             | 6             | 0           | 1.091730                | -0.370749 | -0.621888 |
| 9             | 6             | 0           | 2.582071                | -0.523253 | -0.395654 |
| 10            | 7             | 0           | 3.410399                | 0.439730  | -0.217192 |
| 11            | 6             | 0           | 3.146501                | -1.920025 | -0.423692 |
| 12            | 7             | 0           | 2.960381                | 1.756357  | -0.245603 |
| 13            | 1             | 0           | -4.096316               | -1.753195 | -1.146992 |
| 14            | 1             | 0           | -4.478345               | -1.535075 | 0.446790  |
| 15            | 1             | 0           | -3.945408               | 0.620303  | -0.591594 |
| 16            | 1             | 0           | -1.680090               | -1.686960 | 0.266779  |
| 17            | 1             | 0           | 0.434578                | -1.837388 | 0.799834  |
| 18            | 1             | 0           | 1.578280                | -0.121423 | 2.149044  |
| 19            | 1             | 0           | -0.076871               | -0.396220 | 2.705425  |
| 20            | 1             | 0           | 0.303630                | 1.055640  | 1.768138  |
| 21            | 1             | 0           | 0.811380                | -1.021756 | -1.456510 |
| 22            | 1             | 0           | 0.835700                | 0.646569  | -0.916499 |
| 23            | 1             | 0           | 4.224432                | -1.899995 | -0.261798 |
| 24            | 1             | 0           | 2.691296                | -2.550888 | 0.347246  |
| 25            | 1             | 0           | 2.940932                | -2.399623 | -1.387228 |

|    |   |   |          |          |          |
|----|---|---|----------|----------|----------|
| 26 | 1 | 0 | 3.629819 | 2.335022 | 0.244812 |
| 27 | 1 | 0 | 2.030455 | 1.905975 | 0.138728 |

---

**Data 8:** Cartesian coordinates and energies of the optimized geometry for the conformer **B** of (Z)-5 in DMSO solution.

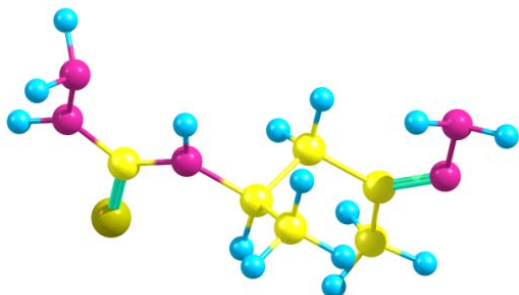

|                                              |                             |
|----------------------------------------------|-----------------------------|
| Electronic Energy =                          | -909.773001499 a.u.         |
| Zero-point correction=                       | 0.229416 (Hartree/Particle) |
| Thermal correction to Energy=                | 0.244282                    |
| Thermal correction to Enthalpy=              | 0.245226                    |
| Thermal correction to Gibbs Free Energy=     | 0.186126                    |
| Sum of electronic and zero-point Energies=   | -909.543585                 |
| Sum of electronic and thermal Energies=      | -909.528720                 |
| Sum of electronic and thermal Enthalpies=    | -909.527775                 |
| Sum of electronic and thermal Free Energies= | -909.586875                 |

Standard orientation:

| Center Number | Atomic Number | Atomic Type | Coordinates (Angstroms) |           |           |
|---------------|---------------|-------------|-------------------------|-----------|-----------|
|               |               |             | X                       | Y         | Z         |
| 1             | 7             | 0           | 3.335761                | -1.845396 | -0.540122 |
| 2             | 7             | 0           | 3.278707                | -0.446045 | -0.435546 |
| 3             | 6             | 0           | 2.147864                | 0.184255  | -0.025246 |
| 4             | 16            | 0           | 2.151763                | 1.888668  | 0.110464  |
| 5             | 7             | 0           | 1.104208                | -0.608030 | 0.248369  |
| 6             | 6             | 0           | -0.237686               | -0.180872 | 0.645717  |
| 7             | 6             | 0           | -0.779012               | -1.144821 | 1.702661  |
| 8             | 6             | 0           | -1.147068               | -0.070896 | -0.606666 |
| 9             | 6             | 0           | -2.517354               | 0.515172  | -0.332696 |
| 10            | 7             | 0           | -3.625186               | -0.131206 | -0.327611 |
| 11            | 6             | 0           | -2.588369               | 2.000218  | -0.087535 |
| 12            | 7             | 0           | -3.638151               | -1.494625 | -0.610182 |
| 13            | 1             | 0           | 4.037222                | -2.210933 | 0.097896  |
| 14            | 1             | 0           | 3.587020                | -2.107238 | -1.488934 |
| 15            | 1             | 0           | 4.094885                | 0.123038  | -0.614129 |
| 16            | 1             | 0           | 1.271931                | -1.598307 | 0.093346  |
| 17            | 1             | 0           | -4.496001               | -1.887284 | -0.244535 |
| 18            | 1             | 0           | -2.845651               | -2.017988 | -0.247172 |
| 19            | 1             | 0           | -0.124714               | 0.811053  | 1.083326  |
| 20            | 1             | 0           | -0.823974               | -2.169835 | 1.320308  |
| 21            | 1             | 0           | -1.785373               | -0.849799 | 2.007412  |
| 22            | 1             | 0           | -0.140586               | -1.141443 | 2.588616  |
| 23            | 1             | 0           | -0.641162               | 0.588424  | -1.318982 |
| 24            | 1             | 0           | -1.221465               | -1.051226 | -1.084754 |
| 25            | 1             | 0           | -1.987871               | 2.291319  | 0.780502  |
| 26            | 1             | 0           | -2.190356               | 2.551664  | -0.946485 |
| 27            | 1             | 0           | -3.619720               | 2.308655  | 0.084397  |

---

**Data 9:** Cartesian coordinates and energies of the optimized geometry for the conformer C of (Z)-5 in DMSO solution.

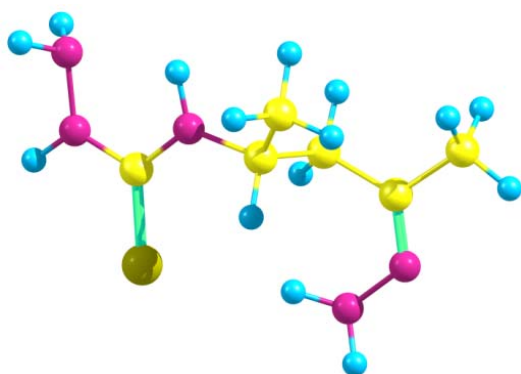

Electronic Energy = -909.774378891 a.u.  
 Zero-point correction= 0.229715 (Hartree/Particle)  
 Thermal correction to Energy= 0.244276  
 Thermal correction to Enthalpy= 0.245220  
 Thermal correction to Gibbs Free Energy= 0.187873  
 Sum of electronic and zero-point Energies= -909.544664  
 Sum of electronic and thermal Energies= -909.530103  
 Sum of electronic and thermal Enthalpies= -909.529159  
 Sum of electronic and thermal Free Energies= -909.586506

Standard orientation:

| Center Number | Atomic Number | Atomic Type | Coordinates (Angstroms) |           |           |
|---------------|---------------|-------------|-------------------------|-----------|-----------|
|               |               |             | X                       | Y         | Z         |
| 1             | 7             | 0           | 3.614707                | -1.328684 | -0.671635 |
| 2             | 7             | 0           | 3.219892                | -0.011263 | -0.387962 |
| 3             | 6             | 0           | 1.960674                | 0.268977  | 0.031760  |
| 4             | 16            | 0           | 1.545057                | 1.890806  | 0.388730  |
| 5             | 7             | 0           | 1.128932                | -0.772871 | 0.139793  |
| 6             | 6             | 0           | -0.279107               | -0.715909 | 0.538089  |
| 7             | 6             | 0           | -0.622783               | -1.981154 | 1.325000  |
| 8             | 6             | 0           | -1.180630               | -0.504631 | -0.710361 |
| 9             | 6             | 0           | -2.617417               | -0.146311 | -0.387793 |
| 10            | 7             | 0           | -3.017487               | 1.039591  | -0.100669 |
| 11            | 6             | 0           | -3.661200               | -1.229310 | -0.465277 |
| 12            | 7             | 0           | -2.119978               | 2.096486  | -0.140925 |
| 13            | 1             | 0           | 4.370365                | -1.603113 | -0.050067 |
| 14            | 1             | 0           | 3.941561                | -1.388041 | -1.631667 |
| 15            | 1             | 0           | 3.875524                | 0.755220  | -0.456240 |
| 16            | 1             | 0           | 1.525947                | -1.668091 | -0.130697 |
| 17            | 1             | 0           | -2.478428               | 2.856690  | 0.421369  |
| 18            | 1             | 0           | -1.149663               | 1.896062  | 0.104515  |
| 19            | 1             | 0           | -0.375131               | 0.146246  | 1.198929  |
| 20            | 1             | 0           | -0.529358               | -2.874687 | 0.699960  |
| 21            | 1             | 0           | -1.647585               | -1.932831 | 1.695961  |
| 22            | 1             | 0           | 0.042442                | -2.087915 | 2.184638  |
| 23            | 1             | 0           | -0.739160               | 0.291843  | -1.317993 |
| 24            | 1             | 0           | -1.158529               | -1.417886 | -1.312028 |
| 25            | 1             | 0           | -3.729463               | -1.617872 | -1.488283 |
| 26            | 1             | 0           | -3.411443               | -2.079576 | 0.176422  |
| 27            | 1             | 0           | -4.637664               | -0.841731 | -0.173217 |

**Data 10:** Cartesian coordinates and energies of the optimized geometry for the conformer **D** of (Z)-**5** in DMSO solution.

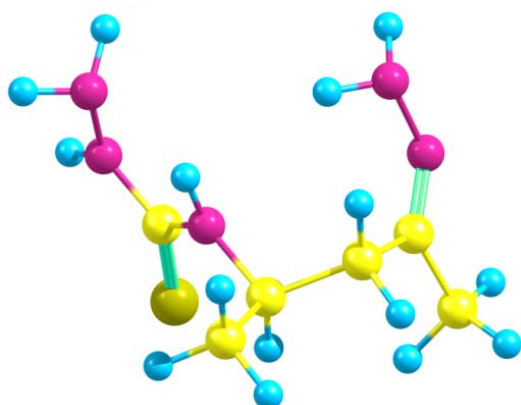

Electronic Energy = -909.773076039 a.u.  
 Zero-point correction= 0.229370 (Hartree/Particle)  
 Thermal correction to Energy= 0.244254  
 Thermal correction to Enthalpy= 0.245199  
 Thermal correction to Gibbs Free Energy= 0.185881  
 Sum of electronic and zero-point Energies= -909.543706  
 Sum of electronic and thermal Energies= -909.528822  
 Sum of electronic and thermal Enthalpies= -909.527877  
 Sum of electronic and thermal Free Energies= -909.587195

Standard orientation:

| Center Number | Atomic Number | Atomic Type | Coordinates (Angstroms) |           |           |
|---------------|---------------|-------------|-------------------------|-----------|-----------|
|               |               |             | X                       | Y         | Z         |
| 1             | 7             | 0           | 2.771248                | 1.563945  | -0.811871 |
| 2             | 7             | 0           | 2.597449                | 0.722350  | 0.299124  |
| 3             | 6             | 0           | 1.566887                | -0.159255 | 0.362023  |
| 4             | 16            | 0           | 1.436990                | -1.180771 | 1.725472  |
| 5             | 7             | 0           | 0.722052                | -0.138385 | -0.680262 |
| 6             | 6             | 0           | -0.382034               | -1.068301 | -0.937336 |
| 7             | 6             | 0           | -0.110811               | -1.854869 | -2.224150 |
| 8             | 6             | 0           | -1.733277               | -0.317205 | -1.007568 |
| 9             | 6             | 0           | -2.205921               | 0.268444  | 0.308251  |
| 10            | 7             | 0           | -2.129318               | 1.500552  | 0.653630  |
| 11            | 6             | 0           | -2.871799               | -0.677572 | 1.272755  |
| 12            | 7             | 0           | -1.578883               | 2.429487  | -0.231313 |
| 13            | 1             | 0           | 3.675331                | 1.385151  | -1.239717 |
| 14            | 1             | 0           | 2.734113                | 2.535492  | -0.516712 |
| 15            | 1             | 0           | 3.245194                | 0.744174  | 1.074872  |
| 16            | 1             | 0           | 1.016679                | 0.475611  | -1.435815 |
| 17            | 1             | 0           | -1.327178               | 3.254419  | 0.298312  |
| 18            | 1             | 0           | -0.757769               | 2.093474  | -0.727612 |
| 19            | 1             | 0           | -0.398357               | -1.756279 | -0.092370 |
| 20            | 1             | 0           | -0.062271               | -1.189160 | -3.091508 |
| 21            | 1             | 0           | -0.908106               | -2.580684 | -2.399266 |
| 22            | 1             | 0           | 0.836127                | -2.394115 | -2.150358 |
| 23            | 1             | 0           | -1.684019               | 0.452022  | -1.784187 |
| 24            | 1             | 0           | -2.485911               | -1.040963 | -1.335669 |
| 25            | 1             | 0           | -2.210018               | -1.510929 | 1.529430  |
| 26            | 1             | 0           | -3.149060               | -0.157417 | 2.189772  |
| 27            | 1             | 0           | -3.772680               | -1.111561 | 0.824273  |



**Data 11:** Cartesian coordinates and energies of the optimized geometry for the conformer **E** of (Z)-**5** in DMSO solution.

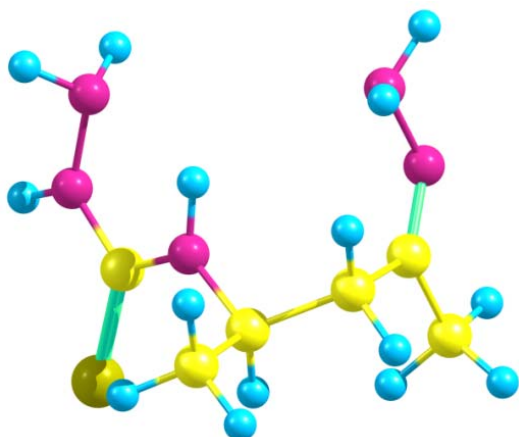

Electronic Energy = -909.773214303 a.u.  
 Thermal correction to Energy= 0.244179  
 Thermal correction to Enthalpy= 0.245123  
 Thermal correction to Gibbs Free Energy= 0.185869  
 Sum of electronic and zero-point Energies= -909.543919  
 Sum of electronic and thermal Energies= -909.529036  
 Sum of electronic and thermal Enthalpies= -909.528091  
 Sum of electronic and thermal Free Energies= -909.587346

Standard orientation:

| Center Number | Atomic Number | Atomic Type | Coordinates (Angstroms) |           |           |
|---------------|---------------|-------------|-------------------------|-----------|-----------|
|               |               |             | X                       | Y         | Z         |
| 1             | 7             | 0           | -1.771334               | 2.454479  | 0.429451  |
| 2             | 7             | 0           | -2.300077               | 1.340675  | -0.242286 |
| 3             | 6             | 0           | -1.686983               | 0.129934  | -0.192857 |
| 4             | 16            | 0           | -2.387397               | -1.183122 | -1.037903 |
| 5             | 7             | 0           | -0.560938               | 0.071954  | 0.527398  |
| 6             | 6             | 0           | 0.234285                | -1.128819 | 0.798037  |
| 7             | 6             | 0           | -0.174230               | -1.777662 | 2.125389  |
| 8             | 6             | 0           | 1.738927                | -0.777653 | 0.787520  |
| 9             | 6             | 0           | 2.218838                | -0.165714 | -0.513026 |
| 10            | 7             | 0           | 2.494487                | 1.071400  | -0.706217 |
| 11            | 6             | 0           | 2.386564                | -1.098974 | -1.683460 |
| 12            | 7             | 0           | 2.307265                | 1.997620  | 0.317806  |
| 13            | 1             | 0           | -2.462747               | 2.823517  | 1.075649  |
| 14            | 1             | 0           | -1.527485               | 3.178687  | -0.240313 |
| 15            | 1             | 0           | -3.135912               | 1.420371  | -0.805147 |
| 16            | 1             | 0           | -0.294588               | 0.947376  | 0.970526  |
| 17            | 1             | 0           | 2.518368                | 1.652123  | 1.252059  |
| 18            | 1             | 0           | 2.885632                | 2.805094  | 0.122990  |
| 19            | 1             | 0           | 0.020706                | -1.824096 | -0.013936 |
| 20            | 1             | 0           | 0.006579                | -1.098654 | 2.963656  |
| 21            | 1             | 0           | 0.400600                | -2.691974 | 2.293947  |
| 22            | 1             | 0           | -1.234824               | -2.036777 | 2.111712  |
| 23            | 1             | 0           | 1.957500                | -0.140184 | 1.648695  |
| 24            | 1             | 0           | 2.287015                | -1.709535 | 0.954974  |
| 25            | 1             | 0           | 1.446735                | -1.606936 | -1.924110 |
| 26            | 1             | 0           | 2.720364                | -0.549383 | -2.563739 |
| 27            | 1             | 0           | 3.120181                | -1.879250 | -1.453203 |

**Table 9** Relative electronic ( $\Delta E$ , kcal/mol) and Gibbs free energies ( $\Delta G$ , kcal/mol) of various conformers of (*E*)- and (*Z*)-**5** in DMSO solution

| Conformer | <i>(E)</i> - <b>5</b> |            | <i>(Z)</i> - <b>5</b> |            |
|-----------|-----------------------|------------|-----------------------|------------|
|           | $\Delta E$            | $\Delta G$ | $\Delta E$            | $\Delta G$ |
| <b>A</b>  | 1.25                  | 0.98       | 5.86                  | 5.95       |
| <b>B</b>  | 1.29                  | 1.06       | 2.12                  | 2.25       |
| <b>C</b>  | 4.64                  | 4.86       | 1.26                  | 2.48       |
| <b>D</b>  | 0.00                  | 0.00       | 2.07                  | 2.05       |
| <b>E</b>  | 1.44                  | 1.36       | 1.99                  | 1.95       |
| <b>F</b>  | 0.35                  | 0.49       | -                     | -          |

**Table 10** Experimental  $^{13}\text{C}$  chemical shifts of (*E*)- and (*Z*)-**5** (DMSO- $d_6$ ) and calculated  $^{13}\text{C}$  chemical shifts for some conformers of (*E*)- and (*Z*)-**5** in DMSO solution<sup>a</sup>

| $^{13}\text{C}$ assignment | Calculated shift of ( <i>E</i> )- <b>5</b> , ppm |                    | Calculated shift of ( <i>Z</i> )- <b>5</b> , ppm |                    | Observed shift, ppm |              |
|----------------------------|--------------------------------------------------|--------------------|--------------------------------------------------|--------------------|---------------------|--------------|
|                            | Conformer <b>D</b>                               | Conformer <b>F</b> | Conformer <b>B</b>                               | Conformer <b>E</b> | Major isomer        | Minor isomer |
| CH-N                       | 43.69                                            | 43.33              | 43.51                                            | 44.08              | 46.90               | 46.03        |
| CH <sub>2</sub> C=N        | 45.31                                            | 46.56              | 33.11                                            | 30.79              | 44.76               | 35.15        |
| CH <sub>3</sub> -C=N       | 13.51                                            | 12.95              | 24.08                                            | 24.10              | 14.12               | 23.49        |

<sup>a</sup> Calculations were performed by the GIAO method at the WC04/6-311+G(2d,p) level of theory using the DFT B3LYP/6-311++G(d,p) optimized geometries.

## MeCN solution

Computational data for various conformers of hydrazone (E)-5

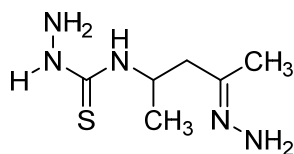

**Data 12:** Cartesian coordinates and energies of the optimized geometry for the conformer A of (E)-5 in MeCN solution.

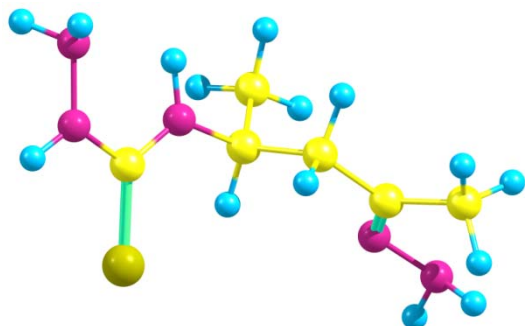

|                                              |                             |
|----------------------------------------------|-----------------------------|
| Electronic Energy =                          | -909.774120308 a.u.         |
| Zero-point correction=                       | 0.228941 (Hartree/Particle) |
| Thermal correction to Energy=                | 0.243939                    |
| Thermal correction to Enthalpy=              | 0.244883                    |
| Thermal correction to Gibbs Free Energy=     | 0.185436                    |
| Sum of electronic and zero-point Energies=   | -909.545179                 |
| Sum of electronic and thermal Energies=      | -909.530182                 |
| Sum of electronic and thermal Enthalpies=    | -909.529238                 |
| Sum of electronic and thermal Free Energies= | -909.588684                 |

Standard orientation:

| Center Number | Atomic Number | Atomic Type | Coordinates (Angstroms) |           |           |
|---------------|---------------|-------------|-------------------------|-----------|-----------|
|               |               |             | X                       | Y         | Z         |
| 1             | 7             | 0           | 3.804355                | -1.274223 | 0.516419  |
| 2             | 7             | 0           | 3.409538                | 0.066104  | 0.375469  |
| 3             | 6             | 0           | 2.146210                | 0.393200  | -0.005608 |
| 4             | 16            | 0           | 1.742203                | 2.045642  | -0.188883 |
| 5             | 7             | 0           | 1.312825                | -0.631348 | -0.210894 |
| 6             | 6             | 0           | -0.106189               | -0.553124 | -0.578000 |
| 7             | 6             | 0           | -0.976397               | -0.574882 | 0.691135  |
| 8             | 6             | 0           | -2.420256               | -0.156182 | 0.526799  |
| 9             | 7             | 0           | -2.812727               | 0.304200  | -0.601456 |
| 10            | 6             | 0           | -3.314151               | -0.290230 | 1.735459  |
| 11            | 7             | 0           | -4.154087               | 0.655674  | -0.737711 |
| 12            | 1             | 0           | 4.143524                | -1.433508 | 1.460591  |
| 13            | 1             | 0           | 4.550142                | -1.486313 | -0.140504 |
| 14            | 1             | 0           | 4.071658                | 0.819512  | 0.500321  |
| 15            | 1             | 0           | 1.718337                | -1.546998 | -0.039634 |
| 16            | 1             | 0           | -4.241106               | 1.303119  | -1.510614 |
| 17            | 1             | 0           | -4.573738               | 1.061665  | 0.096761  |
| 18            | 1             | 0           | -0.248491               | 0.400845  | -1.083044 |
| 19            | 1             | 0           | -0.950385               | -1.579102 | 1.134769  |
| 20            | 1             | 0           | -0.523029               | 0.088189  | 1.438556  |
| 21            | 1             | 0           | -4.195759               | -0.896401 | 1.500553  |
| 22            | 1             | 0           | -2.785965               | -0.755719 | 2.567416  |
| 23            | 1             | 0           | -3.675064               | 0.687739  | 2.076366  |
| 24            | 6             | 0           | -0.423747               | -1.698652 | -1.541098 |
| 25            | 1             | 0           | 0.186063                | -1.624729 | -2.444687 |

|    |   |   |           |           |           |
|----|---|---|-----------|-----------|-----------|
| 26 | 1 | 0 | -0.228867 | -2.669125 | -1.072386 |
| 27 | 1 | 0 | -1.474709 | -1.663085 | -1.827240 |

**Data 13:** Cartesian coordinates and energies of the optimized geometry for the conformer **B** of (*E*)-**5** in MeCN solution.

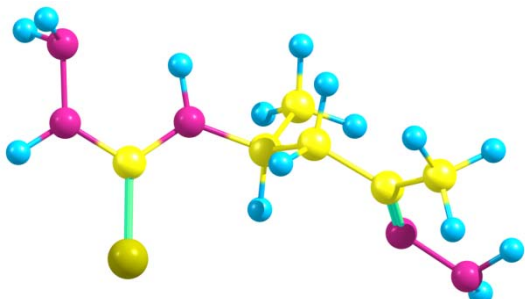

|                                              |                             |
|----------------------------------------------|-----------------------------|
| Electronic Energy =                          | -909.774023944 a.u.         |
| Zero-point correction=                       | 0.229026 (Hartree/Particle) |
| Thermal correction to Energy=                | 0.243988                    |
| Thermal correction to Enthalpy=              | 0.244933                    |
| Thermal correction to Gibbs Free Energy=     | 0.185615                    |
| Sum of electronic and zero-point Energies=   | -909.544998                 |
| Sum of electronic and thermal Energies=      | -909.530036                 |
| Sum of electronic and thermal Enthalpies=    | -909.529091                 |
| Sum of electronic and thermal Free Energies= | -909.588409                 |

Standard orientation:

| Center Number | Atomic Number | Atomic Type | Coordinates (Angstroms) |           |           |
|---------------|---------------|-------------|-------------------------|-----------|-----------|
|               |               |             | X                       | Y         | Z         |
| 1             | 7             | 0           | 3.788741                | -1.321216 | 0.481540  |
| 2             | 7             | 0           | 3.412622                | 0.028129  | 0.381161  |
| 3             | 6             | 0           | 2.154778                | 0.384320  | 0.008037  |
| 4             | 16            | 0           | 1.775435                | 2.047077  | -0.127842 |
| 5             | 7             | 0           | 1.306950                | -0.621751 | -0.227530 |
| 6             | 6             | 0           | -0.110285               | -0.512536 | -0.593005 |
| 7             | 6             | 0           | -0.982354               | -0.593355 | 0.672453  |
| 8             | 6             | 0           | -2.426038               | -0.167181 | 0.525436  |
| 9             | 7             | 0           | -2.808063               | 0.375161  | -0.569378 |
| 10            | 6             | 0           | -3.326173               | -0.375709 | 1.718949  |
| 11            | 7             | 0           | -4.117873               | 0.842033  | -0.651719 |
| 12            | 1             | 0           | 4.125679                | -1.513602 | 1.420318  |
| 13            | 1             | 0           | 4.531506                | -1.523849 | -0.181779 |
| 14            | 1             | 0           | 4.085738                | 0.768110  | 0.525910  |
| 15            | 1             | 0           | 1.699037                | -1.547825 | -0.082547 |
| 16            | 1             | 0           | -4.381463               | 0.896429  | -1.627301 |
| 17            | 1             | 0           | -4.801429               | 0.284537  | -0.142848 |
| 18            | 1             | 0           | -0.242789               | 0.468098  | -1.046720 |
| 19            | 1             | 0           | -0.956894               | -1.616817 | 1.069255  |
| 20            | 1             | 0           | -0.530051               | 0.034945  | 1.450421  |
| 21            | 1             | 0           | -4.134218               | -1.081763 | 1.491522  |
| 22            | 1             | 0           | -2.769530               | -0.773146 | 2.567547  |
| 23            | 1             | 0           | -3.794610               | 0.566713  | 2.022151  |
| 24            | 6             | 0           | -0.435830               | -1.602768 | -1.615966 |
| 25            | 1             | 0           | 0.175687                | -1.485426 | -2.513742 |
| 26            | 1             | 0           | -0.248692               | -2.598195 | -1.199545 |
| 27            | 1             | 0           | -1.486150               | -1.544550 | -1.901107 |

**Data 14:** Cartesian coordinates and energies of the optimized geometry for the conformer C of (*E*)-**5** in MeCN solution.

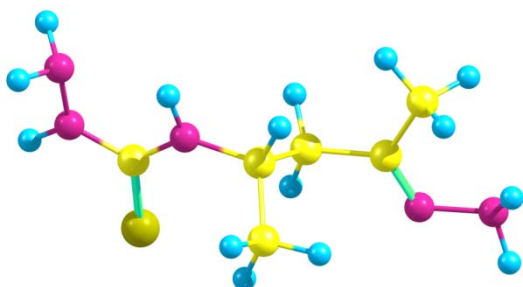

Electronic Energy = -909.768687437 a.u.  
 Zero-point correction= 0.229272 (Hartree/Particle)  
 Thermal correction to Energy= 0.244166  
 Thermal correction to Enthalpy= 0.245110  
 Thermal correction to Gibbs Free Energy= 0.186268  
 Sum of electronic and zero-point Energies= -909.539415  
 Sum of electronic and thermal Energies= -909.524522  
 Sum of electronic and thermal Enthalpies= -909.523578  
 Sum of electronic and thermal Free Energies= -909.582420

Standard orientation:

| Center Number | Atomic Number | Atomic Type | Coordinates (Angstroms) |           |           |
|---------------|---------------|-------------|-------------------------|-----------|-----------|
|               |               |             | X                       | Y         | Z         |
| 1             | 7             | 0           | 3.756248                | -1.613689 | -0.225030 |
| 2             | 7             | 0           | 3.453193                | -0.247186 | -0.331151 |
| 3             | 6             | 0           | 2.199062                | 0.225592  | -0.087884 |
| 4             | 16            | 0           | 1.929905                | 1.905296  | -0.260447 |
| 5             | 7             | 0           | 1.301012                | -0.700965 | 0.267737  |
| 6             | 6             | 0           | -0.126972               | -0.564048 | 0.612410  |
| 7             | 6             | 0           | -0.968794               | -0.086369 | -0.596366 |
| 8             | 6             | 0           | -2.453261               | -0.276618 | -0.404163 |
| 9             | 7             | 0           | -3.180183               | 0.779154  | -0.341292 |
| 10            | 6             | 0           | -3.011400               | -1.676859 | -0.327033 |
| 11            | 7             | 0           | -4.557543               | 0.621094  | -0.233391 |
| 12            | 1             | 0           | 4.488368                | -1.751998 | 0.465674  |
| 13            | 1             | 0           | 4.078389                | -1.967321 | -1.121515 |
| 14            | 1             | 0           | 4.155417                | 0.421829  | -0.616079 |
| 15            | 1             | 0           | 1.689912                | -1.638579 | 0.299714  |
| 16            | 1             | 0           | -4.956445               | 1.473551  | 0.137914  |
| 17            | 1             | 0           | -4.856215               | -0.174319 | 0.327507  |
| 18            | 1             | 0           | -0.423156               | -1.592482 | 0.833919  |
| 19            | 1             | 0           | -0.764222               | 0.965196  | -0.793199 |
| 20            | 1             | 0           | -0.648972               | -0.662410 | -1.473036 |
| 21            | 1             | 0           | -3.815225               | -1.808552 | -1.059540 |
| 22            | 1             | 0           | -2.243037               | -2.424270 | -0.524470 |
| 23            | 1             | 0           | -3.438337               | -1.891196 | 0.660506  |
| 24            | 6             | 0           | -0.355367               | 0.263167  | 1.881565  |
| 25            | 1             | 0           | -1.409213               | 0.218048  | 2.165599  |
| 26            | 1             | 0           | 0.237813                | -0.137382 | 2.707140  |
| 27            | 1             | 0           | -0.082251               | 1.307098  | 1.727753  |

**Data 15:** Cartesian coordinates and energies of the optimized geometry for the conformer **D** of (*E*)-**5** in MeCN solution.

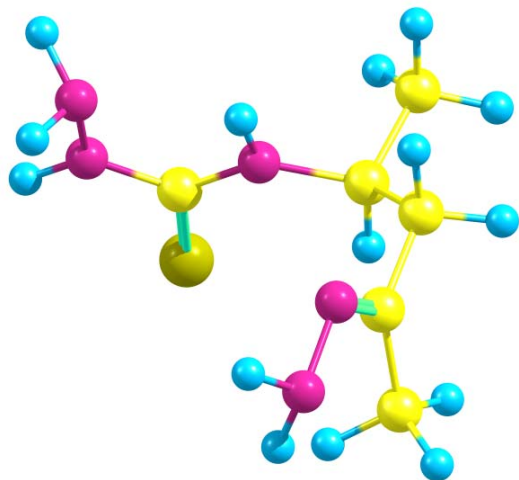

Electronic Energy = -909.776131750 a.u.  
 Zero-point correction= 0.229269 (Hartree/Particle)  
 Thermal correction to Energy= 0.244129  
 Thermal correction to Enthalpy= 0.245073  
 Thermal correction to Gibbs Free Energy= 0.185924  
 Sum of electronic and zero-point Energies= -909.546862  
 Sum of electronic and thermal Energies= -909.532003  
 Sum of electronic and thermal Enthalpies= -909.531059  
 Sum of electronic and thermal Free Energies= -909.590207

Standard orientation:

| Center Number | Atomic Number | Atomic Type | Coordinates (Angstroms) |           |           |
|---------------|---------------|-------------|-------------------------|-----------|-----------|
|               |               |             | X                       | Y         | Z         |
| 1             | 7             | 0           | 1.940550                | -2.146629 | -1.314286 |
| 2             | 7             | 0           | 2.296075                | -1.478637 | -0.131334 |
| 3             | 6             | 0           | 1.700440                | -0.310836 | 0.226419  |
| 4             | 16            | 0           | 2.177431                | 0.442838  | 1.687019  |
| 5             | 7             | 0           | 0.771566                | 0.153133  | -0.615383 |
| 6             | 6             | 0           | 0.022385                | 1.406291  | -0.496149 |
| 7             | 6             | 0           | -1.448366               | 1.163861  | -0.895572 |
| 8             | 6             | 0           | -2.184098               | 0.196748  | -0.002452 |
| 9             | 7             | 0           | -2.552602               | -0.918201 | -0.519005 |
| 10            | 6             | 0           | -2.461376               | 0.588943  | 1.427479  |
| 11            | 7             | 0           | -3.281194               | -1.798808 | 0.273792  |
| 12            | 1             | 0           | 1.573250                | -3.067990 | -1.093711 |
| 13            | 1             | 0           | 2.758304                | -2.251936 | -1.907805 |
| 14            | 1             | 0           | 2.989889                | -1.862418 | 0.495458  |
| 15            | 1             | 0           | 0.627504                | -0.418903 | -1.443020 |
| 16            | 1             | 0           | -3.208781               | -2.728259 | -0.119371 |
| 17            | 1             | 0           | -3.010025               | -1.816665 | 1.255039  |
| 18            | 1             | 0           | 0.076224                | 1.695419  | 0.554065  |
| 19            | 1             | 0           | -1.956086               | 2.134834  | -0.872177 |
| 20            | 1             | 0           | -1.492026               | 0.799010  | -1.926042 |
| 21            | 1             | 0           | -1.921015               | -0.050858 | 2.135514  |
| 22            | 1             | 0           | -2.164871               | 1.619406  | 1.622479  |
| 23            | 1             | 0           | -3.528979               | 0.488174  | 1.651206  |
| 24            | 6             | 0           | 0.660786                | 2.510298  | -1.347098 |
| 25            | 1             | 0           | 1.700014                | 2.668282  | -1.051217 |
| 26            | 1             | 0           | 0.639049                | 2.247958  | -2.408950 |
| 27            | 1             | 0           | 0.119255                | 3.450703  | -1.216019 |

**Data 16:** Cartesian coordinates and energies of the optimized geometry for the conformer **E** of (*E*)-**5** in MeCN solution.

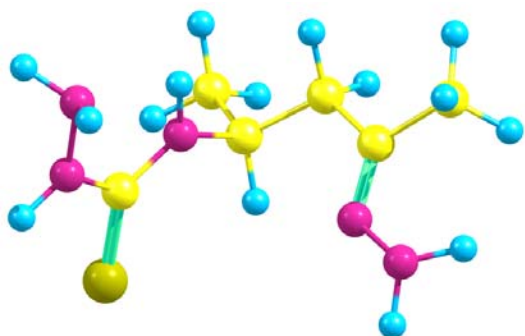

Electronic Energy = -909.773782543 a.u.  
 Zero-point correction= 0.228986 (Hartree/Particle)  
 Thermal correction to Energy= 0.243934  
 Thermal correction to Enthalpy= 0.244878  
 Thermal correction to Gibbs Free Energy= 0.185746  
 Sum of electronic and zero-point Energies= -909.544797  
 Sum of electronic and thermal Energies= -909.529849  
 Sum of electronic and thermal Enthalpies= -909.528905  
 Sum of electronic and thermal Free Energies= -909.588037

Standard orientation:

| Center Number | Atomic Number | Atomic Type | Coordinates (Angstroms) |           |           |
|---------------|---------------|-------------|-------------------------|-----------|-----------|
|               |               |             | X                       | Y         | Z         |
| 1             | 7             | 0           | -2.094877               | -1.378308 | 2.073259  |
| 2             | 7             | 0           | -2.481758               | -1.143105 | 0.744034  |
| 3             | 6             | 0           | -1.801160               | -0.268158 | -0.044704 |
| 4             | 16            | 0           | -2.310510               | -0.054647 | -1.664558 |
| 5             | 7             | 0           | -0.774420               | 0.360364  | 0.531194  |
| 6             | 6             | 0           | 0.096017                | 1.369648  | -0.081681 |
| 7             | 6             | 0           | 1.505956                | 1.249359  | 0.507141  |
| 8             | 6             | 0           | 2.320594                | 0.035374  | 0.116439  |
| 9             | 7             | 0           | 1.879404                | -0.743113 | -0.798310 |
| 10            | 6             | 0           | 3.634492                | -0.167607 | 0.830651  |
| 11            | 7             | 0           | 2.628281                | -1.872472 | -1.117527 |
| 12            | 1             | 0           | -1.831223               | -2.352695 | 2.190040  |
| 13            | 1             | 0           | -2.868496               | -1.170080 | 2.697725  |
| 14            | 1             | 0           | -3.247708               | -1.653193 | 0.326294  |
| 15            | 1             | 0           | -0.627523               | 0.120506  | 1.507414  |
| 16            | 1             | 0           | 2.367958                | -2.182338 | -2.045019 |
| 17            | 1             | 0           | 3.637374                | -1.743906 | -1.068666 |
| 18            | 1             | 0           | 0.127222                | 1.147997  | -1.147682 |
| 19            | 1             | 0           | 2.074233                | 2.142642  | 0.219168  |
| 20            | 1             | 0           | 1.449189                | 1.296257  | 1.603366  |
| 21            | 1             | 0           | 4.481073                | -0.113303 | 0.135515  |
| 22            | 1             | 0           | 3.788948                | 0.590363  | 1.598489  |
| 23            | 1             | 0           | 3.669483                | -1.154241 | 1.305526  |
| 24            | 6             | 0           | -0.473313               | 2.778882  | 0.129435  |
| 25            | 1             | 0           | -1.489546               | 2.841940  | -0.264282 |
| 26            | 1             | 0           | -0.496581               | 3.037154  | 1.192532  |
| 27            | 1             | 0           | 0.141831                | 3.518699  | -0.389723 |

**Data 17:** Cartesian coordinates and energies of the optimized geometry for the conformer **F** of (*E*)-**5** in MeCN solution.

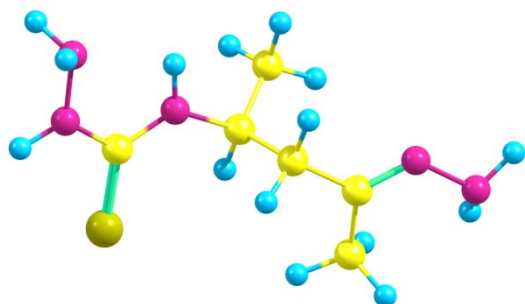

Electronic Energy = -909.775570199 a.u.  
 Zero-point correction= 0.229328 (Hartree/Particle)  
 Thermal correction to Energy= 0.244189  
 Thermal correction to Enthalpy= 0.245133  
 Thermal correction to Gibbs Free Energy= 0.186169  
 Sum of electronic and zero-point Energies= -909.546243  
 Sum of electronic and thermal Energies= -909.531382  
 Sum of electronic and thermal Enthalpies= -909.530437  
 Sum of electronic and thermal Free Energies= -909.589401

Standard orientation:

| Center Number | Atomic Number | Atomic Type | Coordinates (Angstroms) |           |           |
|---------------|---------------|-------------|-------------------------|-----------|-----------|
|               |               |             | X                       | Y         | Z         |
| 1             | 7             | 0           | -3.621582               | -1.621431 | -0.617717 |
| 2             | 7             | 0           | -3.431023               | -0.241276 | -0.441754 |
| 3             | 6             | 0           | -2.239777               | 0.257362  | -0.018967 |
| 4             | 16            | 0           | -2.083888               | 1.946292  | 0.203691  |
| 5             | 7             | 0           | -1.273000               | -0.641667 | 0.195717  |
| 6             | 6             | 0           | 0.110521                | -0.365909 | 0.588827  |
| 7             | 6             | 0           | 1.014972                | -0.327786 | -0.668508 |
| 8             | 6             | 0           | 2.427767                | 0.123764  | -0.395629 |
| 9             | 7             | 0           | 3.368095                | -0.730320 | -0.577526 |
| 10            | 6             | 0           | 2.665697                | 1.546831  | 0.045940  |
| 11            | 7             | 0           | 4.680485                | -0.308546 | -0.395815 |
| 12            | 1             | 0           | -3.907332               | -1.808315 | -1.574419 |
| 13            | 1             | 0           | -4.346179               | -1.953622 | 0.012563  |
| 14            | 1             | 0           | -4.191564               | 0.410851  | -0.575899 |
| 15            | 1             | 0           | -1.535882               | -1.602169 | -0.007281 |
| 16            | 1             | 0           | 5.265255                | -1.118295 | -0.234593 |
| 17            | 1             | 0           | 4.814588                | 0.370778  | 0.350659  |
| 18            | 1             | 0           | 0.102881                | 0.621148  | 1.052380  |
| 19            | 1             | 0           | 1.041792                | -1.320912 | -1.124767 |
| 20            | 1             | 0           | 0.554362                | 0.360837  | -1.386320 |
| 21            | 1             | 0           | 3.390329                | 2.035955  | -0.614184 |
| 22            | 1             | 0           | 1.743045                | 2.126583  | 0.033262  |
| 23            | 1             | 0           | 3.074432                | 1.592905  | 1.062837  |
| 24            | 6             | 0           | 0.560886                | -1.408011 | 1.613573  |
| 25            | 1             | 0           | -0.081144               | -1.382105 | 2.496773  |
| 26            | 1             | 0           | 0.528719                | -2.416983 | 1.190310  |
| 27            | 1             | 0           | 1.587686                | -1.212153 | 1.927866  |



**Table 11** Relative electronic ( $\Delta E$ , kcal/mol) and Gibbs free energies ( $\Delta G$ , kcal/mol) of various conformers of (*E*)-**5** in MeCN solution

| Conformer | <i>(E)</i> - <b>5</b> |            |
|-----------|-----------------------|------------|
|           | $\Delta E$            | $\Delta G$ |
| <b>A</b>  | 1.26                  | 0.96       |
| <b>B</b>  | 1.32                  | 1.13       |
| <b>C</b>  | 4.67                  | 4.89       |
| <b>D</b>  | 0.00                  | 0.00       |
| <b>E</b>  | 1.47                  | 1.36       |
| <b>F</b>  | 0.35                  | 0.51       |

EtOH solution

Computational data for various conformers of hydrazone (*E*)-**5**

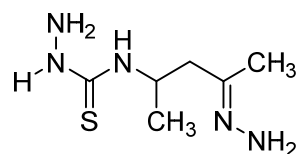

**Data 18:** Cartesian coordinates and energies of the optimized geometry for the conformer **A** of (*E*)-**5** in EtOH solution.

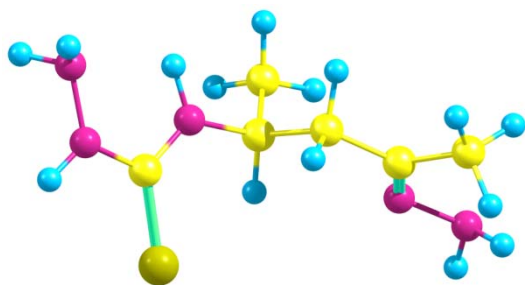

|                                            |                             |
|--------------------------------------------|-----------------------------|
| Electronic Energy =                        | -909.773636657 a.u.         |
| Zero-point correction=                     | 0.228944 (Hartree/Particle) |
| Thermal correction to Energy=              | 0.243941                    |
| Thermal correction to Enthalpy=            | 0.244885                    |
| Thermal correction to Gibbs Free Energy=   | 0.185465                    |
| Sum of electronic and zero-point Energies= | -909.544692                 |
| Sum of electronic and thermal Energies=    | -909.529695                 |
| Sum of electronic and thermal Enthalpies=  | -909.528751                 |

Sum of electronic and thermal Free Energies= -909.588171

Standard orientation:

| Center Number | Atomic Number | Atomic Type | Coordinates (Angstroms) |           |           |
|---------------|---------------|-------------|-------------------------|-----------|-----------|
|               |               |             | X                       | Y         | Z         |
| 1             | 7             | 0           | 3.810303                | -1.261857 | 0.522307  |
| 2             | 7             | 0           | 3.409351                | 0.075675  | 0.372533  |
| 3             | 6             | 0           | 2.144108                | 0.394754  | -0.010364 |
| 4             | 16            | 0           | 1.733984                | 2.043200  | -0.209207 |
| 5             | 7             | 0           | 1.314213                | -0.635081 | -0.204040 |
| 6             | 6             | 0           | -0.105499               | -0.565281 | -0.570409 |
| 7             | 6             | 0           | -0.974293               | -0.562114 | 0.699839  |
| 8             | 6             | 0           | -2.418362               | -0.147090 | 0.528357  |
| 9             | 7             | 0           | -2.811936               | 0.289694  | -0.608809 |
| 10            | 6             | 0           | -3.311087               | -0.256043 | 1.740446  |
| 11            | 7             | 0           | -4.153212               | 0.638700  | -0.750873 |
| 12            | 1             | 0           | 4.154436                | -1.412398 | 1.466075  |
| 13            | 1             | 0           | 4.553449                | -1.476884 | -0.136677 |
| 14            | 1             | 0           | 4.069496                | 0.832700  | 0.485378  |
| 15            | 1             | 0           | 1.723387                | -1.547458 | -0.024689 |
| 16            | 1             | 0           | -4.240944               | 1.269026  | -1.537699 |
| 17            | 1             | 0           | -4.571611               | 1.062961  | 0.075083  |
| 18            | 1             | 0           | -0.249652               | 0.378148  | -1.094464 |
| 19            | 1             | 0           | -0.947557               | -1.557327 | 1.163325  |
| 20            | 1             | 0           | -0.520377               | 0.116056  | 1.433183  |
| 21            | 1             | 0           | -4.194184               | -0.864822 | 1.518236  |
| 22            | 1             | 0           | -2.782829               | -0.706460 | 2.580646  |
| 23            | 1             | 0           | -3.669521               | 0.729035  | 2.063029  |
| 24            | 6             | 0           | -0.423458               | -1.730380 | -1.509554 |
| 25            | 1             | 0           | 0.184876                | -1.674372 | -2.415431 |
| 26            | 1             | 0           | -0.227331               | -2.691169 | -1.021614 |
| 27            | 1             | 0           | -1.474863               | -1.701235 | -1.794791 |

**Data 19:** Cartesian coordinates and energies of the optimized geometry for the conformer **B** of (*E*)-**5** in EtOH solution.

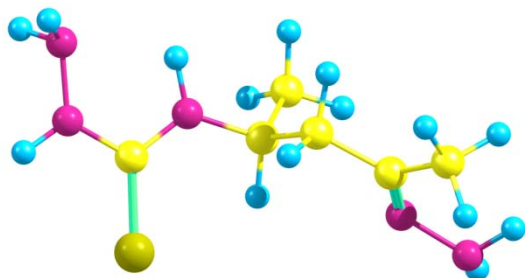

Electronic Energy = -909.773491417 a.u.  
 Zero-point correction= 0.229038 (Hartree/Particle)  
 Thermal correction to Energy= 0.243989  
 Thermal correction to Enthalpy= 0.244934  
 Thermal correction to Gibbs Free Energy= 0.185706  
 Sum of electronic and zero-point Energies= -909.544453  
 Sum of electronic and thermal Energies= -909.529502  
 Sum of electronic and thermal Enthalpies= -909.528558  
 Sum of electronic and thermal Free Energies= -909.587786

Standard orientation:

| Center Number | Atomic Number | Atomic Type | Coordinates (Angstroms) |           |          |
|---------------|---------------|-------------|-------------------------|-----------|----------|
|               |               |             | X                       | Y         | Z        |
| 1             | 7             | 0           | 3.789795                | -1.318858 | 0.485513 |

|    |    |   |           |           |           |
|----|----|---|-----------|-----------|-----------|
| 2  | 7  | 0 | 3.412858  | 0.029949  | 0.381203  |
| 3  | 6  | 0 | 2.154788  | 0.384696  | 0.006088  |
| 4  | 16 | 0 | 1.775672  | 2.046128  | -0.137797 |
| 5  | 7  | 0 | 1.307023  | -0.622857 | -0.224286 |
| 6  | 6  | 0 | -0.110257 | -0.515434 | -0.590257 |
| 7  | 6  | 0 | -0.981856 | -0.586414 | 0.676102  |
| 8  | 6  | 0 | -2.426042 | -0.162915 | 0.526527  |
| 9  | 7  | 0 | -2.810477 | 0.366093  | -0.573894 |
| 10 | 6  | 0 | -3.323925 | -0.357617 | 1.724137  |
| 11 | 7  | 0 | -4.120259 | 0.831655  | -0.659271 |
| 12 | 1  | 0 | 4.128919  | -1.507956 | 1.424143  |
| 13 | 1  | 0 | 4.530681  | -1.524187 | -0.179091 |
| 14 | 1  | 0 | 4.086423  | 0.770776  | 0.519329  |
| 15 | 1  | 0 | 1.699314  | -1.548159 | -0.075411 |
| 16 | 1  | 0 | -4.385820 | 0.875237  | -1.634817 |
| 17 | 1  | 0 | -4.803034 | 0.281101  | -0.141920 |
| 18 | 1  | 0 | -0.242408 | 0.461990  | -1.051043 |
| 19 | 1  | 0 | -0.955029 | -1.606470 | 1.081683  |
| 20 | 1  | 0 | -0.529695 | 0.049165  | 1.448189  |
| 21 | 1  | 0 | -4.133282 | -1.065194 | 1.506084  |
| 22 | 1  | 0 | -2.765996 | -0.746442 | 2.575895  |
| 23 | 1  | 0 | -3.790590 | 0.588608  | 2.018130  |
| 24 | 6  | 0 | -0.436340 | -1.613006 | -1.605142 |
| 25 | 1  | 0 | 0.175994  | -1.503106 | -2.503304 |
| 26 | 1  | 0 | -0.250706 | -2.605584 | -1.181162 |
| 27 | 1  | 0 | -1.486320 | -1.555558 | -1.891536 |

**Data 20:** Cartesian coordinates and energies of the optimized geometry for the conformer C of (*E*)-**5** in EtOH solution.

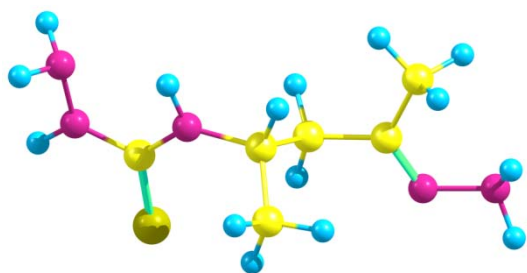

|                                              |                             |
|----------------------------------------------|-----------------------------|
| Electronic Energy =                          | -909.768140071 a.u.         |
| Zero-point correction=                       | 0.229273 (Hartree/Particle) |
| Thermal correction to Energy=                | 0.244166                    |
| Thermal correction to Enthalpy=              | 0.245111                    |
| Thermal correction to Gibbs Free Energy=     | 0.186259                    |
| Sum of electronic and zero-point Energies=   | -909.538867                 |
| Sum of electronic and thermal Energies=      | -909.523974                 |
| Sum of electronic and thermal Enthalpies=    | -909.523030                 |
| Sum of electronic and thermal Free Energies= | -909.581881                 |

Standard orientation:

| Center Number | Atomic Number | Atomic Type | Coordinates (Angstroms) |           |           |
|---------------|---------------|-------------|-------------------------|-----------|-----------|
|               |               |             | X                       | Y         | Z         |
| 1             | 7             | 0           | 3.754603                | -1.616437 | -0.222624 |
| 2             | 7             | 0           | 3.453127                | -0.249749 | -0.330535 |
| 3             | 6             | 0           | 2.199290                | 0.225243  | -0.088276 |
| 4             | 16            | 0           | 1.932109                | 1.904259  | -0.263893 |
| 5             | 7             | 0           | 1.300258                | -0.699999 | 0.269036  |
| 6             | 6             | 0           | -0.127434               | -0.560433 | 0.613726  |
| 7             | 6             | 0           | -0.969333               | -0.083165 | -0.595176 |
| 8             | 6             | 0           | -2.453533               | -0.276291 | -0.403662 |
| 9             | 7             | 0           | -3.182527               | 0.777948  | -0.340247 |
| 10            | 6             | 0           | -3.009197               | -1.677688 | -0.328074 |

|    |   |   |           |           |           |
|----|---|---|-----------|-----------|-----------|
| 11 | 7 | 0 | -4.559441 | 0.617205  | -0.233065 |
| 12 | 1 | 0 | 4.486508  | -1.754996 | 0.468244  |
| 13 | 1 | 0 | 4.075761  | -1.972106 | -1.118652 |
| 14 | 1 | 0 | 4.155663  | 0.418120  | -0.617328 |
| 15 | 1 | 0 | 1.688068  | -1.637934 | 0.302855  |
| 16 | 1 | 0 | -4.960372 | 1.469018  | 0.137451  |
| 17 | 1 | 0 | -4.857244 | -0.178906 | 0.327281  |
| 18 | 1 | 0 | -0.425052 | -1.588164 | 0.836885  |
| 19 | 1 | 0 | -0.766546 | 0.968910  | -0.791046 |
| 20 | 1 | 0 | -0.648176 | -0.657845 | -1.472268 |
| 21 | 1 | 0 | -3.812252 | -1.810152 | -1.061294 |
| 22 | 1 | 0 | -2.239365 | -2.423577 | -0.525666 |
| 23 | 1 | 0 | -3.436477 | -1.893851 | 0.658957  |
| 24 | 6 | 0 | -0.354301 | 0.269324  | 1.881488  |
| 25 | 1 | 0 | -1.408453 | 0.227654  | 2.164936  |
| 26 | 1 | 0 | 0.237467  | -0.131231 | 2.708092  |
| 27 | 1 | 0 | -0.078385 | 1.312205  | 1.725730  |

**Data 21:** Cartesian coordinates and energies of the optimized geometry for the conformer **D** of (*E*)-**5** in EtOH solution.

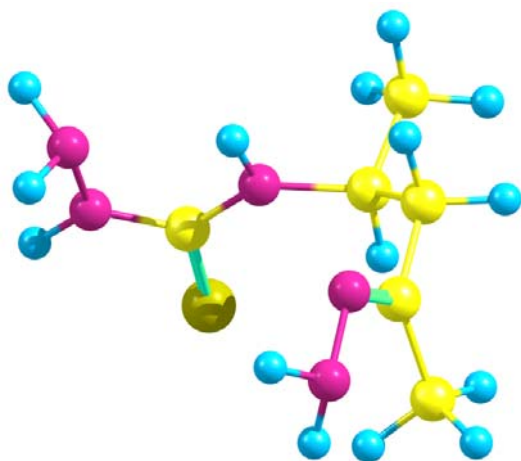

|                                              |                             |
|----------------------------------------------|-----------------------------|
| Electronic Energy =                          | -909.775682032 a.u.         |
| Zero-point correction=                       | 0.229273 (Hartree/Particle) |
| Thermal correction to Energy=                | 0.244133                    |
| Thermal correction to Enthalpy=              | 0.245077                    |
| Thermal correction to Gibbs Free Energy=     | 0.185926                    |
| Sum of electronic and zero-point Energies=   | -909.546409                 |
| Sum of electronic and thermal Energies=      | -909.531549                 |
| Sum of electronic and thermal Enthalpies=    | -909.530605                 |
| Sum of electronic and thermal Free Energies= | -909.589756                 |

Standard orientation:

| Center Number | Atomic Number | Atomic Type | Coordinates (Angstroms) |           |           |
|---------------|---------------|-------------|-------------------------|-----------|-----------|
|               |               |             | X                       | Y         | Z         |
| 1             | 7             | 0           | 1.939934                | -2.147192 | -1.313831 |
| 2             | 7             | 0           | 2.295329                | -1.479246 | -0.130897 |
| 3             | 6             | 0           | 1.700314                | -0.310735 | 0.226703  |
| 4             | 16            | 0           | 2.178048                | 0.443063  | 1.686376  |
| 5             | 7             | 0           | 0.771278                | 0.152977  | -0.615261 |
| 6             | 6             | 0           | 0.022486                | 1.406312  | -0.496097 |
| 7             | 6             | 0           | -1.448366               | 1.164216  | -0.895343 |
| 8             | 6             | 0           | -2.184092               | 0.196995  | -0.002359 |
| 9             | 7             | 0           | -2.552411               | -0.917899 | -0.519088 |
| 10            | 6             | 0           | -2.461550               | 0.588979  | 1.427602  |
| 11            | 7             | 0           | -3.280832               | -1.798585 | 0.273570  |
| 12            | 1             | 0           | 1.571650                | -3.068244 | -1.093716 |
| 13            | 1             | 0           | 2.757457                | -2.252631 | -1.907619 |

|    |   |   |           |           |           |
|----|---|---|-----------|-----------|-----------|
| 14 | 1 | 0 | 2.989604  | -1.862365 | 0.495764  |
| 15 | 1 | 0 | 0.626071  | -0.419816 | -1.442128 |
| 16 | 1 | 0 | -3.209212 | -2.727838 | -0.120129 |
| 17 | 1 | 0 | -3.009623 | -1.816796 | 1.254787  |
| 18 | 1 | 0 | 0.076626  | 1.695535  | 0.554095  |
| 19 | 1 | 0 | -1.955990 | 2.135260  | -0.871795 |
| 20 | 1 | 0 | -1.492392 | 0.799457  | -1.925840 |
| 21 | 1 | 0 | -1.921192 | -0.050805 | 2.135663  |
| 22 | 1 | 0 | -2.164943 | 1.619360  | 1.622892  |
| 23 | 1 | 0 | -3.529214 | 0.488216  | 1.651074  |
| 24 | 6 | 0 | 0.661152  | 2.510084  | -1.347173 |
| 25 | 1 | 0 | 1.700355  | 2.667872  | -1.051158 |
| 26 | 1 | 0 | 0.639417  | 2.247619  | -2.409021 |
| 27 | 1 | 0 | 0.119876  | 3.450683  | -1.216321 |

**Data 22:** Cartesian coordinates and energies of the optimized geometry for the conformer **E** of (*E*)-**5** in EtOH solution.

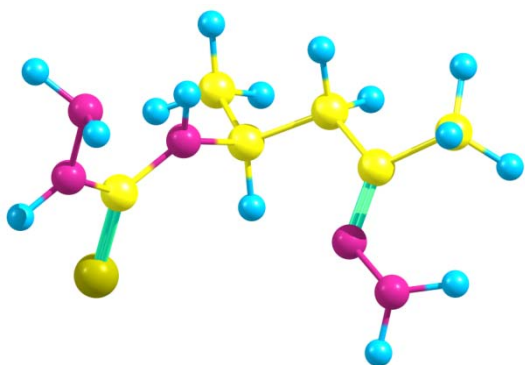

|                                              |                             |
|----------------------------------------------|-----------------------------|
| Electronic Energy =                          | -909.773226647 a.u.         |
| Zero-point correction=                       | 0.228968 (Hartree/Particle) |
| Thermal correction to Energy=                | 0.243933                    |
| Thermal correction to Enthalpy=              | 0.244877                    |
| Thermal correction to Gibbs Free Energy=     | 0.185601                    |
| Sum of electronic and zero-point Energies=   | -909.544259                 |
| Sum of electronic and thermal Energies=      | 909.529294                  |
| Sum of electronic and thermal Enthalpies=    | -909.528350                 |
| Sum of electronic and thermal Free Energies= | -909.587625                 |

Standard orientation:

| Center Number | Atomic Number | Atomic Type | Coordinates (Angstroms) |           |           |
|---------------|---------------|-------------|-------------------------|-----------|-----------|
|               |               |             | X                       | Y         | Z         |
| 1             | 7             | 0           | -2.078809               | -1.419608 | 2.053263  |
| 2             | 7             | 0           | -2.477429               | -1.157163 | 0.732646  |
| 3             | 6             | 0           | -1.802588               | -0.267481 | -0.045087 |
| 4             | 16            | 0           | -2.323650               | -0.024555 | -1.656354 |
| 5             | 7             | 0           | -0.772579               | 0.351461  | 0.535600  |
| 6             | 6             | 0           | 0.095028                | 1.369757  | -0.066120 |
| 7             | 6             | 0           | 1.505987                | 1.244337  | 0.519263  |
| 8             | 6             | 0           | 2.321569                | 0.035903  | 0.113518  |
| 9             | 7             | 0           | 1.879498                | -0.732656 | -0.809064 |
| 10            | 6             | 0           | 3.637134                | -0.173539 | 0.822884  |
| 11            | 7             | 0           | 2.629328                | -1.856770 | -1.143208 |
| 12            | 1             | 0           | -1.810100               | -2.395106 | 2.147246  |
| 13            | 1             | 0           | -2.847887               | -1.227538 | 2.688373  |
| 14            | 1             | 0           | -3.242714               | -1.663301 | 0.308936  |
| 15            | 1             | 0           | -0.617473               | 0.092471  | 1.505557  |
| 16            | 1             | 0           | 2.365141                | -2.157940 | -2.072445 |
| 17            | 1             | 0           | 3.638358                | -1.726581 | -1.097568 |
| 18            | 1             | 0           | 0.124969                | 1.161487  | -1.134934 |
| 19            | 1             | 0           | 2.072695                | 2.141622  | 0.240722  |

|    |   |   |           |           |           |
|----|---|---|-----------|-----------|-----------|
| 20 | 1 | 0 | 1.450630  | 1.278775  | 1.616071  |
| 21 | 1 | 0 | 4.482647  | -0.107319 | 0.127463  |
| 22 | 1 | 0 | 3.790872  | 0.574045  | 1.601020  |
| 23 | 1 | 0 | 3.675360  | -1.166654 | 1.283793  |
| 24 | 6 | 0 | -0.475732 | 2.775510  | 0.163546  |
| 25 | 1 | 0 | -1.492492 | 2.842296  | -0.228039 |
| 26 | 1 | 0 | -0.497802 | 3.020212  | 1.229890  |
| 27 | 1 | 0 | 0.137739  | 3.522630  | -0.347109 |

**Data 23:** Cartesian coordinates and energies of the optimized geometry for the conformer **F** of (*E*)-**5** in EtOH solution.

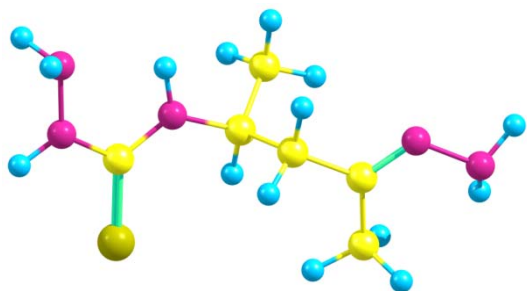

|                                              |                             |
|----------------------------------------------|-----------------------------|
| Electronic Energy =                          | -909.775113574 a.u.         |
| Zero-point correction=                       | 0.229338 (Hartree/Particle) |
| Thermal correction to Energy=                | 0.244194                    |
| Thermal correction to Enthalpy=              | 0.245138                    |
| Thermal correction to Gibbs Free Energy=     | 0.186205                    |
| Sum of electronic and zero-point Energies=   | -909.545776                 |
| Sum of electronic and thermal Energies=      | -909.530920                 |
| Sum of electronic and thermal Enthalpies=    | -909.529975                 |
| Sum of electronic and thermal Free Energies= | -909.588908                 |

Standard orientation:

| Center Number | Atomic Number | Atomic Type | Coordinates (Angstroms) |           |           |
|---------------|---------------|-------------|-------------------------|-----------|-----------|
|               |               |             | X                       | Y         | Z         |
| 1             | 7             | 0           | -3.624206               | -1.617607 | -0.619054 |
| 2             | 7             | 0           | -3.430793               | -0.237985 | -0.442363 |
| 3             | 6             | 0           | -2.238657               | 0.258324  | -0.018425 |
| 4             | 16            | 0           | -2.079983               | 1.946182  | 0.206135  |
| 5             | 7             | 0           | -1.273555               | -0.642913 | 0.195482  |
| 6             | 6             | 0           | 0.110354                | -0.369344 | 0.588658  |
| 7             | 6             | 0           | 1.014430                | -0.328191 | -0.668835 |
| 8             | 6             | 0           | 2.426864                | 0.124098  | -0.395408 |
| 9             | 7             | 0           | 3.367814                | -0.729188 | -0.577645 |
| 10            | 6             | 0           | 2.663624                | 1.547163  | 0.046904  |
| 11            | 7             | 0           | 4.679746                | -0.306599 | -0.395654 |
| 12            | 1             | 0           | -3.910298               | -1.803702 | -1.575791 |
| 13            | 1             | 0           | -4.348911               | -1.949170 | 0.011426  |
| 14            | 1             | 0           | -4.190127               | 0.415864  | -0.574869 |
| 15            | 1             | 0           | -1.537772               | -1.602716 | -0.008829 |
| 16            | 1             | 0           | 5.265334                | -1.115915 | -0.235426 |
| 17            | 1             | 0           | 4.813619                | 0.372764  | 0.350810  |
| 18            | 1             | 0           | 0.103521                | 0.616441  | 1.054967  |
| 19            | 1             | 0           | 1.042128                | -1.320425 | -1.126998 |
| 20            | 1             | 0           | 0.553043                | 0.361492  | -1.385103 |
| 21            | 1             | 0           | 3.386989                | 2.037497  | -0.613732 |
| 22            | 1             | 0           | 1.740280                | 2.125839  | 0.035612  |
| 23            | 1             | 0           | 3.073406                | 1.593152  | 1.063413  |
| 24            | 6             | 0           | 0.560357                | -1.414710 | 1.610214  |
| 25            | 1             | 0           | -0.080877               | -1.390494 | 2.494047  |
| 26            | 1             | 0           | 0.526811                | -2.422502 | 1.184221  |
| 27            | 1             | 0           | 1.587697                | -1.221031 | 1.924075  |

**Table 12** Relative electronic ( $\Delta E$ , kcal/mol) and Gibbs free energies ( $\Delta G$ , kcal/mol) of various conformers of (*E*)-**5** in EtOH solution

| Conformer | <i>(E)</i> - <b>5</b> |            |
|-----------|-----------------------|------------|
|           | $\Delta E$            | $\Delta G$ |
| <b>A</b>  | 1.28                  | 0.99       |
| <b>B</b>  | 1.37                  | 1.24       |
| <b>C</b>  | 4.73                  | 4.94       |
| <b>D</b>  | 0.00                  | 0.00       |
| <b>E</b>  | 1.54                  | 1.34       |
| <b>F</b>  | 0.36                  | 0.45       |

### Hydroxypyrimidine-2-thione **4** and its acyclic isomer, thiosemicarbazide **3**

#### DMSO solution

*Computational data for various stereoisomer of hydroxypyrimidine-2-thione **4***

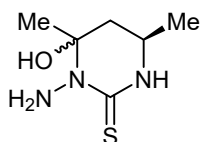

**Data 24:** Cartesian coordinates and energies of the optimized geometry for the most stable conformer of (*4R\**,*6R\**)-**4** in DMSO solution.

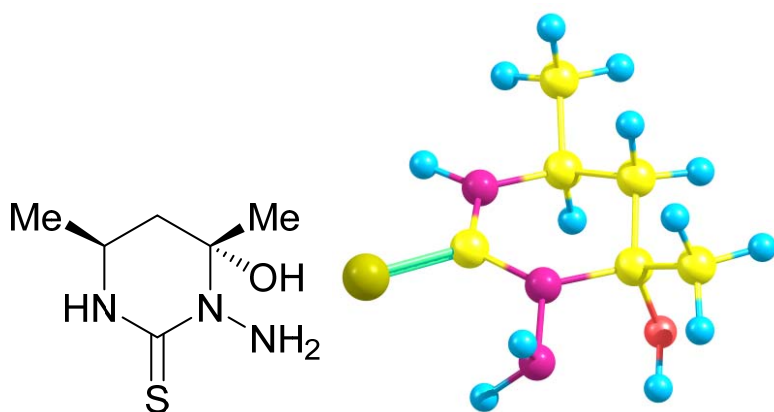

Electronic Energy =

-874.313547221 a.u.

Zero-point correction= 0.202256 (Hartree/Particle)  
 Thermal correction to Energy= 0.214347  
 Thermal correction to Enthalpy= 0.215291  
 Thermal correction to Gibbs Free Energy= 0.164655  
 Sum of electronic and zero-point Energies= -874.111291  
 Sum of electronic and thermal Energies= -874.099200  
 Sum of electronic and thermal Enthalpies= -874.098256  
 Sum of electronic and thermal Free Energies= -874.148892

Standard orientation:

| Center Number | Atomic Number | Atomic Type | Coordinates (Angstroms) |           |           |
|---------------|---------------|-------------|-------------------------|-----------|-----------|
|               |               |             | X                       | Y         | Z         |
| 1             | 6             | 0           | 2.234239                | -2.434266 | -0.148359 |
| 2             | 6             | 0           | 1.378088                | -1.257817 | 0.309290  |
| 3             | 7             | 0           | -0.036951               | -1.528598 | 0.025381  |
| 4             | 6             | 0           | -0.999644               | -0.589315 | -0.044975 |
| 5             | 16            | 0           | -2.648089               | -1.053078 | -0.079080 |
| 6             | 7             | 0           | -0.612899               | 0.716062  | -0.090940 |
| 7             | 6             | 0           | 0.793031                | 1.181889  | -0.003327 |
| 8             | 6             | 0           | 1.733619                | 0.043484  | -0.394117 |
| 9             | 8             | 0           | 1.087883                | 1.526754  | 1.349978  |
| 10            | 6             | 0           | 0.998752                | 2.389919  | -0.920429 |
| 11            | 7             | 0           | -1.556708               | 1.748161  | 0.123213  |
| 12            | 1             | 0           | -0.373922               | -2.476978 | 0.103146  |
| 13            | 1             | 0           | 0.483206                | 2.236610  | 1.605482  |
| 14            | 1             | 0           | -2.268644               | 1.387536  | 0.754939  |
| 15            | 1             | 0           | -2.031540               | 1.945282  | -0.755528 |
| 16            | 1             | 0           | 3.281879                | -2.247216 | 0.096818  |
| 17            | 1             | 0           | 1.932951                | -3.356948 | 0.354818  |
| 18            | 1             | 0           | 2.149992                | -2.582891 | -1.228145 |
| 19            | 1             | 0           | 1.499215                | -1.125252 | 1.390997  |
| 20            | 1             | 0           | 2.749933                | 0.347325  | -0.139719 |
| 21            | 1             | 0           | 1.684122                | -0.103160 | -1.476563 |
| 22            | 1             | 0           | 0.730224                | 2.145135  | -1.950372 |
| 23            | 1             | 0           | 0.395084                | 3.235734  | -0.591992 |
| 24            | 1             | 0           | 2.051252                | 2.677294  | -0.890501 |

**Data 25:** Cartesian coordinates and energies of the optimized geometry for the most stable conformer of (4*R*\*,6*S*\*)-4 in DMSO solution.

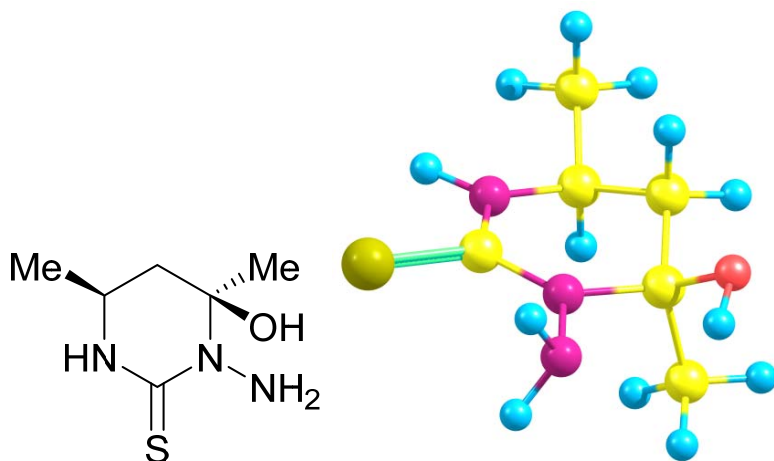

Electronic Energy = -874.313895860 a.u.  
 Zero-point correction= 0.202570 (Hartree/Particle)  
 Thermal correction to Energy= 0.214453  
 Thermal correction to Enthalpy= 0.215397



Thermal correction to Gibbs Free Energy= 0.165302  
 Sum of electronic and zero-point Energies= -874.111326  
 Sum of electronic and thermal Energies= -874.099443  
 Sum of electronic and thermal Enthalpies= -874.098499  
 Sum of electronic and thermal Free Energies= -874.148594

Standard orientation:

| Center Number | Atomic Number | Atomic Type | Coordinates (Angstroms) |           |           |
|---------------|---------------|-------------|-------------------------|-----------|-----------|
|               |               |             | X                       | Y         | Z         |
| 1             | 6             | 0           | 2.299124                | -2.355586 | -0.222648 |
| 2             | 6             | 0           | 1.451771                | -1.196622 | 0.295981  |
| 3             | 7             | 0           | 0.026155                | -1.518569 | 0.143634  |
| 4             | 6             | 0           | -0.974836               | -0.623429 | 0.032293  |
| 5             | 16            | 0           | -2.603967               | -1.149116 | 0.005146  |
| 6             | 7             | 0           | -0.636226               | 0.687723  | -0.064394 |
| 7             | 6             | 0           | 0.761767                | 1.218293  | -0.038792 |
| 8             | 6             | 0           | 1.719392                | 0.102821  | -0.453027 |
| 9             | 8             | 0           | 0.859299                | 2.224171  | -1.029819 |
| 10            | 6             | 0           | 1.061060                | 1.804302  | 1.344585  |
| 11            | 7             | 0           | -1.607363               | 1.705027  | -0.128174 |
| 12            | 1             | 0           | -0.267900               | -2.476437 | 0.264462  |
| 13            | 1             | 0           | 0.109483                | 2.821445  | -0.879581 |
| 14            | 1             | 0           | -2.181352               | 1.671970  | 0.711565  |
| 15            | 1             | 0           | -2.225596               | 1.514442  | -0.913206 |
| 16            | 1             | 0           | 3.358230                | -2.139312 | -0.067494 |
| 17            | 1             | 0           | 2.064139                | -3.279702 | 0.312061  |
| 18            | 1             | 0           | 2.127541                | -2.516966 | -1.289936 |
| 19            | 1             | 0           | 1.667055                | -1.059677 | 1.362725  |
| 20            | 1             | 0           | 2.743936                | 0.433856  | -0.276589 |
| 21            | 1             | 0           | 1.596402                | -0.063815 | -1.526695 |
| 22            | 1             | 0           | 1.006824                | 1.040070  | 2.122510  |
| 23            | 1             | 0           | 2.062388                | 2.239519  | 1.344887  |
| 24            | 1             | 0           | 0.340309                | 2.589162  | 1.583696  |

Computational data for various conformers of thiosemicarbazide **3**

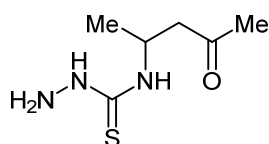

**Data 26:** Cartesian coordinates and energies of the optimized geometry for the conformer **A** of thiosemicarbazide **3** in DMSO solution.

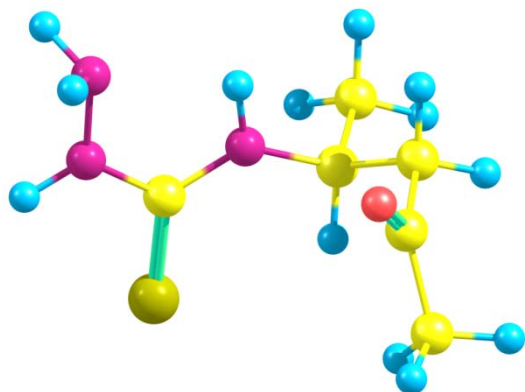

Electronic Energy = -874.316325536 a.u.  
 Zero-point correction= 0.199768 (Hartree/Particle)

Thermal correction to Energy= 0.213405  
 Thermal correction to Enthalpy= 0.214349  
 Thermal correction to Gibbs Free Energy= 0.157250  
 Sum of electronic and zero-point Energies= -874.116558  
 Sum of electronic and thermal Energies= -874.102920  
 Sum of electronic and thermal Enthalpies= -874.101976  
 Sum of electronic and thermal Free Energies= -874.159075

Standard orientation:

| Center Number | Atomic Number | Atomic Type | Coordinates (Angstroms) |           |           |
|---------------|---------------|-------------|-------------------------|-----------|-----------|
|               |               |             | X                       | Y         | Z         |
| 1             | 6             | 0           | -0.440040               | 1.995011  | -1.825634 |
| 2             | 6             | 0           | -0.648533               | 0.972264  | -0.702851 |
| 3             | 7             | 0           | 0.470356                | 0.031451  | -0.637710 |
| 4             | 6             | 0           | 1.477223                | 0.047227  | 0.245491  |
| 5             | 16            | 0           | 1.618797                | 1.126631  | 1.564437  |
| 6             | 7             | 0           | 2.446000                | -0.883649 | 0.052088  |
| 7             | 6             | 0           | -2.278191               | -0.768616 | 0.240112  |
| 8             | 6             | 0           | -1.973620               | 0.199256  | -0.892203 |
| 9             | 8             | 0           | -2.128727               | -1.969648 | 0.094532  |
| 10            | 6             | 0           | -2.787343               | -0.184021 | 1.535503  |
| 11            | 7             | 0           | 2.376742                | -1.797540 | -1.012014 |
| 12            | 1             | 0           | 0.567538                | -0.661444 | -1.375522 |
| 13            | 1             | 0           | 2.333570                | -2.746027 | -0.649880 |
| 14            | 1             | 0           | 3.203577                | -1.706009 | -1.595052 |
| 15            | 1             | 0           | 3.205370                | -0.916621 | 0.718450  |
| 16            | 1             | 0           | -1.260521               | 2.716533  | -1.839559 |
| 17            | 1             | 0           | 0.494670                | 2.538408  | -1.671910 |
| 18            | 1             | 0           | -0.398761               | 1.503301  | -2.801650 |
| 19            | 1             | 0           | -0.660359               | 1.495326  | 0.253150  |
| 20            | 1             | 0           | -2.779981               | 0.935006  | -0.962713 |
| 21            | 1             | 0           | -1.942237               | -0.365485 | -1.827616 |
| 22            | 1             | 0           | -2.826818               | -0.948672 | 2.310148  |
| 23            | 1             | 0           | -3.792812               | 0.218133  | 1.370627  |
| 24            | 1             | 0           | -2.162828               | 0.650072  | 1.865236  |

**Data 27:** Cartesian coordinates and energies of the optimized geometry for the conformer **B** of thiosemicarbazide **3** in DMSO solution.

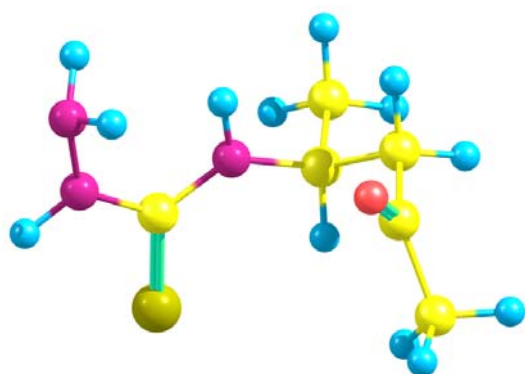

Electronic Energy = -874.311519510 a.u.  
 Zero-point correction= 0.199790 (Hartree/Particle)  
 Thermal correction to Energy= 0.213395  
 Thermal correction to Enthalpy= 0.214339  
 Thermal correction to Gibbs Free Energy= 0.157782  
 Sum of electronic and zero-point Energies= -874.111730  
 Sum of electronic and thermal Energies= -874.098125  
 Sum of electronic and thermal Enthalpies= -874.097180

Sum of electronic and thermal Free Energies= -874.153737

Standard orientation:

| Center Number | Atomic Number | Atomic Type | Coordinates (Angstroms) |           |           |
|---------------|---------------|-------------|-------------------------|-----------|-----------|
|               |               |             | X                       | Y         | Z         |
| 1             | 6             | 0           | -0.403126               | 2.014277  | -1.780985 |
| 2             | 6             | 0           | -0.637639               | 0.983284  | -0.671885 |
| 3             | 7             | 0           | 0.451737                | 0.000419  | -0.626238 |
| 4             | 6             | 0           | 1.500700                | 0.018597  | 0.211272  |
| 5             | 16            | 0           | 1.732604                | 1.170222  | 1.452204  |
| 6             | 7             | 0           | 2.432438                | -0.957879 | 0.046114  |
| 7             | 6             | 0           | -2.304257               | -0.725688 | 0.260604  |
| 8             | 6             | 0           | -1.985420               | 0.252562  | -0.859688 |
| 9             | 8             | 0           | -2.180544               | -1.926868 | 0.094751  |
| 10            | 6             | 0           | -2.790543               | -0.149980 | 1.568150  |
| 11            | 7             | 0           | 2.394398                | -2.010461 | -0.875101 |
| 12            | 1             | 0           | 0.449299                | -0.703959 | -1.353908 |
| 13            | 1             | 0           | 2.449926                | -1.675286 | -1.832303 |
| 14            | 1             | 0           | 1.575471                | -2.597374 | -0.744061 |
| 15            | 1             | 0           | 3.204779                | -0.963836 | 0.694198  |
| 16            | 1             | 0           | -1.197095               | 2.764907  | -1.773176 |
| 17            | 1             | 0           | 0.551894                | 2.521192  | -1.628723 |
| 18            | 1             | 0           | -0.390828               | 1.537441  | -2.764997 |
| 19            | 1             | 0           | -0.623351               | 1.491713  | 0.291652  |
| 20            | 1             | 0           | -2.769417               | 1.013377  | -0.909306 |
| 21            | 1             | 0           | -1.982483               | -0.296962 | -1.804880 |
| 22            | 1             | 0           | -2.843007               | -0.925566 | 2.330995  |
| 23            | 1             | 0           | -3.786959               | 0.279090  | 1.416864  |
| 24            | 1             | 0           | -2.143856               | 0.663800  | 1.906137  |

**Data 28:** Cartesian coordinates and energies of the optimized geometry for the conformer C of thiosemicarbazide **3** in DMSO solution.

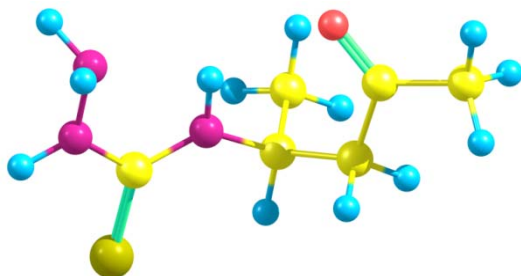

Electronic Energy = -874.317731124 a.u.  
Zero-point correction= 0.199632 (Hartree/Particle)  
Thermal correction to Energy= 0.213211  
Thermal correction to Enthalpy= 0.214156  
Thermal correction to Gibbs Free Energy= 0.157920  
Sum of electronic and zero-point Energies= -874.118099  
Sum of electronic and thermal Energies= -874.104520  
Sum of electronic and thermal Enthalpies= -874.103576  
Sum of electronic and thermal Free Energies= -874.159811

Standard orientation:

| Center Number | Atomic Number | Atomic Type | Coordinates (Angstroms) |           |           |
|---------------|---------------|-------------|-------------------------|-----------|-----------|
|               |               |             | X                       | Y         | Z         |
| 1             | 6             | 0           | -0.730439               | -1.472972 | 1.686792  |
| 2             | 6             | 0           | -0.422949               | -1.085872 | 0.234159  |
| 3             | 7             | 0           | 0.458090                | 0.081660  | 0.172901  |
| 4             | 6             | 0           | 1.759644                | 0.081357  | -0.127188 |

|    |    |   |           |           |           |
|----|----|---|-----------|-----------|-----------|
| 5  | 16 | 0 | 2.674030  | -1.295726 | -0.578816 |
| 6  | 7  | 0 | 2.386654  | 1.284681  | -0.063452 |
| 7  | 6  | 0 | -2.563507 | 0.327221  | -0.224860 |
| 8  | 6  | 0 | -1.686548 | -0.853123 | -0.609759 |
| 9  | 8  | 0 | -2.164412 | 1.222142  | 0.502877  |
| 10 | 6  | 0 | -3.955398 | 0.342011  | -0.806611 |
| 11 | 7  | 0 | 1.691744  | 2.454465  | 0.284175  |
| 12 | 1  | 0 | 0.059141  | 0.977252  | 0.440154  |
| 13 | 1  | 0 | 1.729385  | 3.118372  | -0.484182 |
| 14 | 1  | 0 | 2.120961  | 2.876427  | 1.102506  |
| 15 | 1  | 0 | 3.365967  | 1.315882  | -0.311499 |
| 16 | 1  | 0 | -1.361875 | -2.365097 | 1.711979  |
| 17 | 1  | 0 | 0.196384  | -1.696540 | 2.219603  |
| 18 | 1  | 0 | -1.247382 | -0.669110 | 2.214648  |
| 19 | 1  | 0 | 0.129716  | -1.902386 | -0.230830 |
| 20 | 1  | 0 | -1.406878 | -0.696489 | -1.659778 |
| 21 | 1  | 0 | -2.299079 | -1.760438 | -0.604344 |
| 22 | 1  | 0 | -4.413857 | 1.321378  | -0.674857 |
| 23 | 1  | 0 | -4.561259 | -0.411102 | -0.291054 |
| 24 | 1  | 0 | -3.940650 | 0.068956  | -1.864872 |

**Data 29:** Cartesian coordinates and energies of the optimized geometry for the conformer **D** of thiosemicarbazide **3** in DMSO solution.

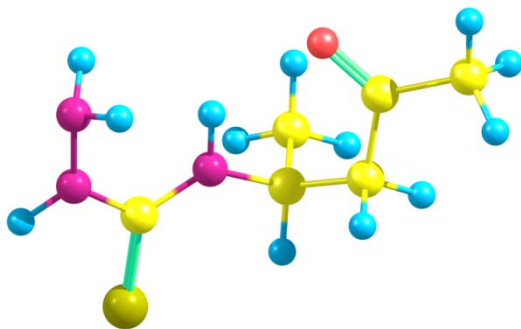

|                                              |                             |
|----------------------------------------------|-----------------------------|
| Electronic Energy =                          | -874.313910319 a.u.         |
| Zero-point correction=                       | 0.199767 (Hartree/Particle) |
| Thermal correction to Energy=                | 0.213234                    |
| Thermal correction to Enthalpy=              | 0.214179                    |
| Thermal correction to Gibbs Free Energy=     | 0.158525                    |
| Sum of electronic and zero-point Energies=   | -874.114143                 |
| Sum of electronic and thermal Energies=      | -874.100676                 |
| Sum of electronic and thermal Enthalpies=    | -874.099732                 |
| Sum of electronic and thermal Free Energies= | -874.155385                 |

Standard orientation:

| Center Number | Atomic Number | Atomic Type | Coordinates (Angstroms) |           |           |
|---------------|---------------|-------------|-------------------------|-----------|-----------|
|               |               |             | X                       | Y         | Z         |
| 1             | 6             | 0           | -0.691732               | -1.562212 | 1.578955  |
| 2             | 6             | 0           | -0.413474               | -1.098173 | 0.143598  |
| 3             | 7             | 0           | 0.449719                | 0.088856  | 0.127961  |
| 4             | 6             | 0           | 1.765719                | 0.106012  | -0.113019 |
| 5             | 16            | 0           | 2.704421                | -1.267564 | -0.518063 |
| 6             | 7             | 0           | 2.388121                | 1.313089  | -0.028083 |
| 7             | 6             | 0           | -2.563292               | 0.328171  | -0.205577 |
| 8             | 6             | 0           | -1.694903               | -0.833074 | -0.663277 |
| 9             | 8             | 0           | -2.120143               | 1.230502  | 0.488745  |
| 10            | 6             | 0           | -3.996519               | 0.319707  | -0.670550 |
| 11            | 7             | 0           | 1.786589                | 2.548904  | 0.238986  |
| 12            | 1             | 0           | -0.016200               | 0.947371  | 0.402044  |
| 13            | 1             | 0           | 1.389937                | 2.573816  | 1.174000  |
| 14            | 1             | 0           | 1.075816                | 2.774177  | -0.451825 |

|    |   |   |           |           |           |
|----|---|---|-----------|-----------|-----------|
| 15 | 1 | 0 | 3.373117  | 1.336022  | -0.240923 |
| 16 | 1 | 0 | -1.303466 | -2.468087 | 1.567959  |
| 17 | 1 | 0 | 0.246935  | -1.790865 | 2.087919  |
| 18 | 1 | 0 | -1.218563 | -0.796790 | 2.152952  |
| 19 | 1 | 0 | 0.142389  | -1.880644 | -0.372440 |
| 20 | 1 | 0 | -1.437345 | -0.624696 | -1.710155 |
| 21 | 1 | 0 | -2.301984 | -1.742796 | -0.686047 |
| 22 | 1 | 0 | -4.463578 | 1.287072  | -0.490207 |
| 23 | 1 | 0 | -4.540866 | -0.453468 | -0.117292 |
| 24 | 1 | 0 | -4.061577 | 0.057375  | -1.729748 |

**Table 13** Relative electronic ( $\Delta E$ , kcal/mol) and Gibbs free energies ( $\Delta G$ , kcal/mol) of stereoisomers of hydroxypyrimidine-2-thione **4** and its acyclic isomer **3** in DMSO solution

|            | Stereoisomers of pyrimidine <b>4</b> |                             | Conformers of thiosemicarbazide <b>3</b> |      |      |      |
|------------|--------------------------------------|-----------------------------|------------------------------------------|------|------|------|
|            | (4 <i>R</i> *,6 <i>R</i> *)          | (4 <i>R</i> *,6 <i>S</i> *) | A                                        | B    | C    | D    |
| $\Delta E$ | 2.63                                 | 2.41                        | 0.88                                     | 3.90 | 0.00 | 2.40 |
| $\Delta G$ | 6.85                                 | 7.04                        | 0.46                                     | 3.81 | 0.00 | 2.78 |

#### EtOH solution

Computational data for various stereoisomer of hydroxypyrimidine-2-thione **4**

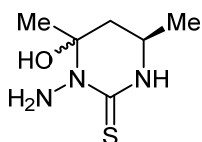

**Data 30:** Cartesian coordinates and energies of the optimized geometry for the most stable conformer of (4*R*\*,6*R*\*)-**4** in EtOH solution.

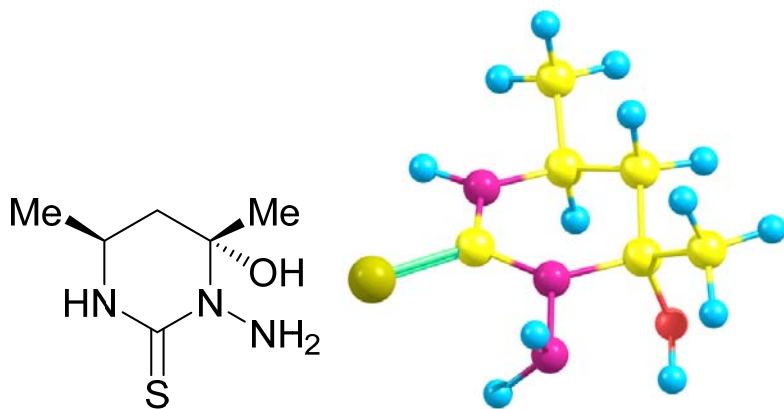

Electronic Energy = -874.313098579 a.u.  
 Zero-point correction= 0.202275 (Hartree/Particle)  
 Thermal correction to Energy= 0.214359

Thermal correction to Enthalpy= 0.215303  
 Thermal correction to Gibbs Free Energy= 0.164684  
 Sum of electronic and zero-point Energies= -874.110823  
 Sum of electronic and thermal Energies= -874.098739  
 Sum of electronic and thermal Enthalpies= -874.097795  
 Sum of electronic and thermal Free Energies= -874.148415

Standard orientation:

| Center Number | Atomic Number | Atomic Type | Coordinates (Angstroms) |           |           |
|---------------|---------------|-------------|-------------------------|-----------|-----------|
|               |               |             | X                       | Y         | Z         |
| 1             | 6             | 0           | 2.236124                | -2.432871 | -0.146499 |
| 2             | 6             | 0           | 1.378101                | -1.257075 | 0.309321  |
| 3             | 7             | 0           | -0.036031               | -1.528931 | 0.022511  |
| 4             | 6             | 0           | -0.999779               | -0.590101 | -0.046072 |
| 5             | 16            | 0           | -2.647362               | -1.054105 | -0.078907 |
| 6             | 7             | 0           | -0.613148               | 0.715646  | -0.091725 |
| 7             | 6             | 0           | 0.792288                | 1.182270  | -0.003607 |
| 8             | 6             | 0           | 1.733935                | 0.044427  | -0.393592 |
| 9             | 8             | 0           | 1.086640                | 1.527800  | 1.349550  |
| 10            | 6             | 0           | 0.997514                | 2.390260  | -0.920996 |
| 11            | 7             | 0           | -1.557309               | 1.746976  | 0.125093  |
| 12            | 1             | 0           | -0.372946               | -2.477245 | 0.101342  |
| 13            | 1             | 0           | 0.479093                | 2.235070  | 1.605406  |
| 14            | 1             | 0           | -2.268506               | 1.384324  | 0.756616  |
| 15            | 1             | 0           | -2.033497               | 1.944556  | -0.752821 |
| 16            | 1             | 0           | 3.283156                | -2.245244 | 0.100903  |
| 17            | 1             | 0           | 1.934486                | -3.355829 | 0.355996  |
| 18            | 1             | 0           | 2.154250                | -2.581694 | -1.226448 |
| 19            | 1             | 0           | 1.497231                | -1.123964 | 1.391214  |
| 20            | 1             | 0           | 2.749751                | 0.348901  | -0.137882 |
| 21            | 1             | 0           | 1.685694                | -0.102272 | -1.476112 |
| 22            | 1             | 0           | 0.730297                | 2.144875  | -1.951163 |
| 23            | 1             | 0           | 0.392411                | 3.235371  | -0.593362 |
| 24            | 1             | 0           | 2.049583                | 2.679142  | -0.890069 |

**Data 31:** Cartesian coordinates and energies of the optimized geometry for the most stable conformer of (4*R*\*,6*S*\*)-4 in EtOH solution.

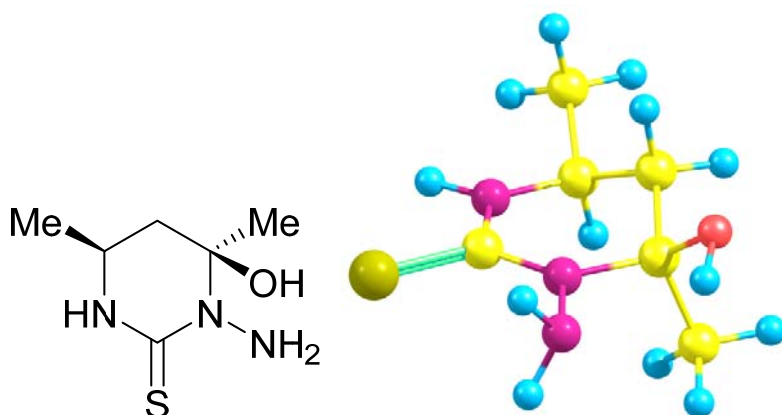

Electronic Energy = -874.313414457 a.u.  
 Zero-point correction= 0.202574 (Hartree/Particle)  
 Thermal correction to Energy= 0.214459  
 Thermal correction to Enthalpy= 0.215403  
 Thermal correction to Gibbs Free Energy= 0.165291  
 Sum of electronic and zero-point Energies= -874.110840  
 Sum of electronic and thermal Energies= -874.098956

Sum of electronic and thermal Enthalpies= -874.098011  
 Sum of electronic and thermal Free Energies= -874.148123

Standard orientation:

| Center Number | Atomic Number | Atomic Type | Coordinates (Angstroms) |           |           |
|---------------|---------------|-------------|-------------------------|-----------|-----------|
|               |               |             | X                       | Y         | Z         |
| 1             | 6             | 0           | 2.300103                | -2.354732 | -0.222557 |
| 2             | 6             | 0           | 1.451993                | -1.196181 | 0.295825  |
| 3             | 7             | 0           | 0.026782                | -1.518731 | 0.142980  |
| 4             | 6             | 0           | -0.975008               | -0.623926 | 0.032017  |
| 5             | 16            | 0           | -2.603360               | -1.149642 | 0.005543  |
| 6             | 7             | 0           | -0.636348               | 0.687463  | -0.064453 |
| 7             | 6             | 0           | 0.761219                | 1.218612  | -0.038675 |
| 8             | 6             | 0           | 1.719370                | 0.103528  | -0.452876 |
| 9             | 8             | 0           | 0.858902                | 2.224669  | -1.029290 |
| 10            | 6             | 0           | 1.060140                | 1.804485  | 1.344935  |
| 11            | 7             | 0           | -1.608083               | 1.704194  | -0.128823 |
| 12            | 1             | 0           | -0.267201               | -2.476659 | 0.263290  |
| 13            | 1             | 0           | 0.108124                | 2.820927  | -0.879979 |
| 14            | 1             | 0           | -2.183450               | 1.669304  | 0.709934  |
| 15            | 1             | 0           | -2.225304               | 1.512938  | -0.914554 |
| 16            | 1             | 0           | 3.359114                | -2.138436 | -0.066627 |
| 17            | 1             | 0           | 2.064940                | -3.279165 | 0.311595  |
| 18            | 1             | 0           | 2.129284                | -2.515850 | -1.289997 |
| 19            | 1             | 0           | 1.667146                | -1.059142 | 1.362688  |
| 20            | 1             | 0           | 2.743773                | 0.435055  | -0.276356 |
| 21            | 1             | 0           | 1.596544                | -0.062774 | -1.526594 |
| 22            | 1             | 0           | 1.006411                | 1.040091  | 2.122783  |
| 23            | 1             | 0           | 2.061046                | 2.240686  | 1.345371  |
| 24            | 1             | 0           | 0.338756                | 2.588746  | 1.584138  |

Computational data for various conformers of thiosemicarbazide **3**

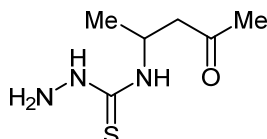

**Data 32:** Cartesian coordinates and energies of the optimized geometry for the conformer **A** of thiosemicarbazide **3** in EtOH solution.

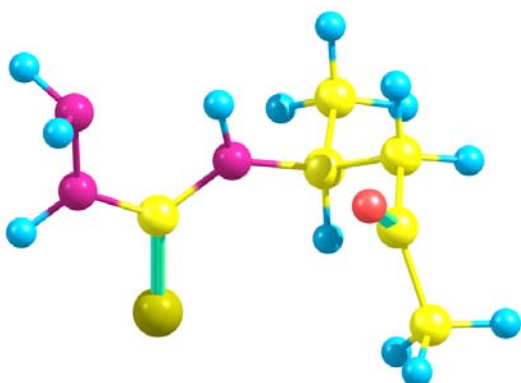

Electronic Energy = -874.315655846 a.u.  
 Zero-point correction= 0.199687 (Hartree/Particle)  
 Thermal correction to Energy= 0.213366  
 Thermal correction to Enthalpy= 0.214310  
 Thermal correction to Gibbs Free Energy= 0.156943

Sum of electronic and zero-point Energies= -874.115969  
 Sum of electronic and thermal Energies= -874.102290  
 Sum of electronic and thermal Enthalpies= -874.101346  
 Sum of electronic and thermal Free Energies= -874.158713

Standard orientation:

| Center Number | Atomic Number | Atomic Type | Coordinates (Angstroms) |           |           |
|---------------|---------------|-------------|-------------------------|-----------|-----------|
|               |               |             | X                       | Y         | Z         |
| 1             | 6             | 0           | 0.419164                | -1.955426 | -1.857218 |
| 2             | 6             | 0           | 0.643528                | -0.962437 | -0.710933 |
| 3             | 7             | 0           | -0.455628               | 0.000091  | -0.625652 |
| 4             | 6             | 0           | -1.485565               | -0.039395 | 0.230259  |
| 5             | 16            | 0           | -1.682671               | -1.180891 | 1.487019  |
| 6             | 7             | 0           | -2.430773               | 0.920410  | 0.059489  |
| 7             | 6             | 0           | 2.298424                | 0.736216  | 0.269212  |
| 8             | 6             | 0           | 1.982390                | -0.209833 | -0.878922 |
| 9             | 8             | 0           | 2.200990                | 1.943102  | 0.129693  |
| 10            | 6             | 0           | 2.751976                | 0.122293  | 1.571788  |
| 11            | 7             | 0           | -2.308354               | 1.892596  | -0.946493 |
| 12            | 1             | 0           | -0.519512               | 0.731239  | -1.329310 |
| 13            | 1             | 0           | -2.242965               | 2.816727  | -0.528899 |
| 14            | 1             | 0           | -3.122999               | 1.861934  | -1.552432 |
| 15            | 1             | 0           | -3.199730               | 0.942857  | 0.715240  |
| 16            | 1             | 0           | 1.224867                | -2.693190 | -1.884086 |
| 17            | 1             | 0           | -0.526818               | -2.483153 | -1.718987 |
| 18            | 1             | 0           | 0.392048                | -1.441411 | -2.822170 |
| 19            | 1             | 0           | 0.642171                | -1.508187 | 0.232415  |
| 20            | 1             | 0           | 2.777021                | -0.957780 | -0.955718 |
| 21            | 1             | 0           | 1.968181                | 0.370106  | -1.805501 |
| 22            | 1             | 0           | 2.837058                | 0.886060  | 2.343557  |
| 23            | 1             | 0           | 3.726243                | -0.354840 | 1.421333  |
| 24            | 1             | 0           | 2.063025                | -0.661110 | 1.898181  |

**Data 33:** Cartesian coordinates and energies of the optimized geometry for the conformer **B** of thiosemicarbazide **3** in EtOH solution.

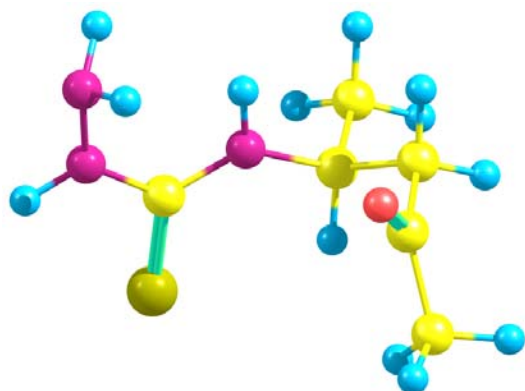

Electronic Energy = -874.310827803 a.u.  
 Zero-point correction= 0.199844 (Hartree/Particle)  
 Thermal correction to Energy= 0.213420  
 Thermal correction to Enthalpy= 0.214364  
 Thermal correction to Gibbs Free Energy= 0.158054  
 Sum of electronic and zero-point Energies= -874.110984  
 Sum of electronic and thermal Energies= -874.097408  
 Sum of electronic and thermal Enthalpies= -874.096464  
 Sum of electronic and thermal Free Energies= -874.152774



Standard orientation:

| Center Number | Atomic Number | Atomic Type | Coordinates (Angstroms) |           |           |
|---------------|---------------|-------------|-------------------------|-----------|-----------|
|               |               |             | X                       | Y         | Z         |
| 1             | 6             | 0           | 0.400379                | -2.022745 | -1.772196 |
| 2             | 6             | 0           | 0.636874                | -0.989680 | -0.665443 |
| 3             | 7             | 0           | -0.447528               | -0.001286 | -0.624903 |
| 4             | 6             | 0           | -1.500838               | -0.015217 | 0.207884  |
| 5             | 16            | 0           | -1.746042               | -1.168516 | 1.443481  |
| 6             | 7             | 0           | -2.425327               | 0.968113  | 0.040488  |
| 7             | 6             | 0           | 2.304933                | 0.721424  | 0.261363  |
| 8             | 6             | 0           | 1.988475                | -0.265857 | -0.851926 |
| 9             | 8             | 0           | 2.189098                | 1.921372  | 0.082581  |
| 10            | 6             | 0           | 2.777816                | 0.155822  | 1.578253  |
| 11            | 7             | 0           | -2.374918               | 2.023755  | -0.876424 |
| 12            | 1             | 0           | -0.435820               | 0.706082  | -1.349472 |
| 13            | 1             | 0           | -2.429444               | 1.693077  | -1.835191 |
| 14            | 1             | 0           | -1.552755               | 2.604684  | -0.739270 |
| 15            | 1             | 0           | -3.200155               | 0.977892  | 0.685549  |
| 16            | 1             | 0           | 1.190796                | -2.777120 | -1.760547 |
| 17            | 1             | 0           | -0.557245               | -2.524887 | -1.620717 |
| 18            | 1             | 0           | 0.392724                | -1.548576 | -2.757601 |
| 19            | 1             | 0           | 0.617617                | -1.495453 | 0.299459  |
| 20            | 1             | 0           | 2.769858                | -1.030026 | -0.891076 |
| 21            | 1             | 0           | 1.992958                | 0.275810  | -1.801689 |
| 22            | 1             | 0           | 2.834543                | 0.939906  | 2.332015  |
| 23            | 1             | 0           | 3.769990                | -0.286646 | 1.438213  |
| 24            | 1             | 0           | 2.119395                | -0.646013 | 1.922252  |

**Data 34:** Cartesian coordinates and energies of the optimized geometry for the conformer C of thiosemicarbazide **3** in EtOH solution.

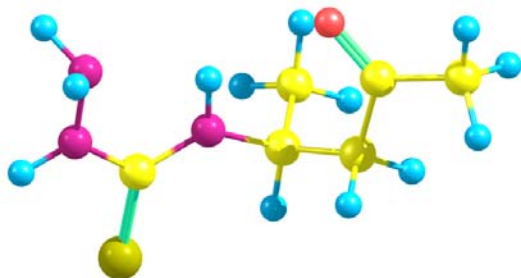

|                                              |                             |
|----------------------------------------------|-----------------------------|
| Electronic Energy =                          | -874.317088567 a.u.         |
| Zero-point correction=                       | 0.199636 (Hartree/Particle) |
| Thermal correction to Energy=                | 0.213219                    |
| Thermal correction to Enthalpy=              | 0.214163                    |
| Thermal correction to Gibbs Free Energy=     | 0.157875                    |
| Sum of electronic and zero-point Energies=   | -874.117453                 |
| Sum of electronic and thermal Energies=      | -874.103869                 |
| Sum of electronic and thermal Enthalpies=    | -874.102925                 |
| Sum of electronic and thermal Free Energies= | -874.159213                 |

Standard orientation:

| Center Number | Atomic Number | Atomic Type | Coordinates (Angstroms) |           |           |
|---------------|---------------|-------------|-------------------------|-----------|-----------|
|               |               |             | X                       | Y         | Z         |
| 1             | 6             | 0           | -0.734389               | -1.464270 | 1.697232  |
| 2             | 6             | 0           | -0.423262               | -1.084606 | 0.243428  |
| 3             | 7             | 0           | 0.458710                | 0.081849  | 0.178757  |
| 4             | 6             | 0           | 1.758934                | 0.079405  | -0.128152 |
| 5             | 16            | 0           | 2.668941                | -1.297946 | -0.584857 |
| 6             | 7             | 0           | 2.387689                | 1.282423  | -0.067488 |
| 7             | 6             | 0           | -2.561797               | 0.327337  | -0.227883 |

|    |   |   |           |           |           |
|----|---|---|-----------|-----------|-----------|
| 8  | 6 | 0 | -1.684709 | -0.855589 | -0.604788 |
| 9  | 8 | 0 | -2.165574 | 1.223245  | 0.499857  |
| 10 | 6 | 0 | -3.950577 | 0.343006  | -0.817608 |
| 11 | 7 | 0 | 1.696902  | 2.452454  | 0.286886  |
| 12 | 1 | 0 | 0.062163  | 0.978077  | 0.447313  |
| 13 | 1 | 0 | 1.732069  | 3.119070  | -0.479160 |
| 14 | 1 | 0 | 2.128829  | 2.870661  | 1.105701  |
| 15 | 1 | 0 | 3.366567  | 1.311328  | -0.317438 |
| 16 | 1 | 0 | -1.366928 | -2.355564 | 1.725480  |
| 17 | 1 | 0 | 0.191064  | -1.686520 | 2.232924  |
| 18 | 1 | 0 | -1.251405 | -0.657230 | 2.220145  |
| 19 | 1 | 0 | 0.130394  | -1.903532 | -0.216129 |
| 20 | 1 | 0 | -1.402252 | -0.704839 | -1.654928 |
| 21 | 1 | 0 | -2.297994 | -1.762483 | -0.596155 |
| 22 | 1 | 0 | -4.407594 | 1.323772  | -0.691382 |
| 23 | 1 | 0 | -4.561089 | -0.407023 | -0.303038 |
| 24 | 1 | 0 | -3.930588 | 0.066673  | -1.874936 |

**Data 35:** Cartesian coordinates and energies of the optimized geometry for the conformer **D** of thiosemicarbazide **3** in EtOH solution.

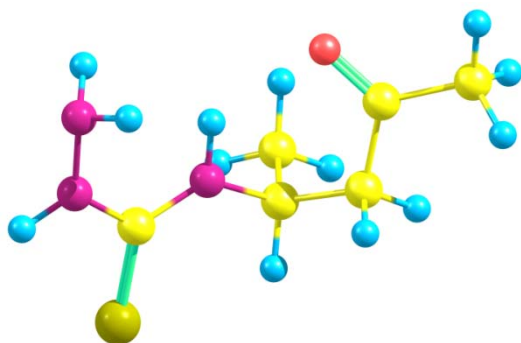

|                                              |                             |
|----------------------------------------------|-----------------------------|
| Electronic Energy =                          | -874.313299361 a.u.         |
| Zero-point correction=                       | 0.199784 (Hartree/Particle) |
| Thermal correction to Energy=                | 0.213246                    |
| Thermal correction to Enthalpy=              | 0.214190                    |
| Thermal correction to Gibbs Free Energy=     | 0.158570                    |
| Sum of electronic and zero-point Energies=   | -874.113515                 |
| Sum of electronic and thermal Energies=      | -874.100054                 |
| Sum of electronic and thermal Enthalpies=    | -874.099109                 |
| Sum of electronic and thermal Free Energies= | -874.154730                 |

Standard orientation:

| Center Number | Atomic Number | Atomic Type | Coordinates (Angstroms) |           |           |
|---------------|---------------|-------------|-------------------------|-----------|-----------|
|               |               |             | X                       | Y         | Z         |
| 1             | 6             | 0           | -0.691038               | -1.560497 | 1.580508  |
| 2             | 6             | 0           | -0.413291               | -1.097865 | 0.144579  |
| 3             | 7             | 0           | 0.449501                | 0.089203  | 0.127277  |
| 4             | 6             | 0           | 1.765979                | 0.105361  | -0.113576 |
| 5             | 16            | 0           | 2.703482                | -1.267959 | -0.518595 |
| 6             | 7             | 0           | 2.388358                | 1.312721  | -0.028283 |
| 7             | 6             | 0           | -2.563095               | 0.328324  | -0.206224 |
| 8             | 6             | 0           | -1.695190               | -0.834146 | -0.662071 |
| 9             | 8             | 0           | -2.119315               | 1.232442  | 0.485160  |
| 10            | 6             | 0           | -3.997014               | 0.318744  | -0.669511 |
| 11            | 7             | 0           | 1.787033                | 2.548348  | 0.239709  |
| 12            | 1             | 0           | -0.015962               | 0.947794  | 0.401617  |
| 13            | 1             | 0           | 1.390423                | 2.572993  | 1.174737  |
| 14            | 1             | 0           | 1.076692                | 2.774801  | -0.451121 |
| 15            | 1             | 0           | 3.373462                | 1.335486  | -0.240637 |
| 16            | 1             | 0           | -1.302219               | -2.466800 | 1.570825  |
| 17            | 1             | 0           | 0.247944                | -1.788208 | 2.089256  |

|    |   |   |           |           |           |
|----|---|---|-----------|-----------|-----------|
| 18 | 1 | 0 | -1.218053 | -0.794703 | 2.153908  |
| 19 | 1 | 0 | 0.142865  | -1.880692 | -0.370663 |
| 20 | 1 | 0 | -1.438093 | -0.627953 | -1.709526 |
| 21 | 1 | 0 | -2.302526 | -1.743803 | -0.682746 |
| 22 | 1 | 0 | -4.463715 | 1.286594  | -0.490922 |
| 23 | 1 | 0 | -4.540876 | -0.452916 | -0.113659 |
| 24 | 1 | 0 | -4.063490 | 0.053796  | -1.727991 |

**Table 14** Relative electronic ( $\Delta E$ , kcal/mol) and Gibbs free energies ( $\Delta G$ , kcal/mol) of stereoisomers of hydroxypyrimidine-2-thione **4** and its acyclic isomer **3** in EtOH solution

|            | Stereoisomers of pyrimidine <b>4</b> |                             | Conformers of thiosemicarbazide <b>3</b> |          |          |          |
|------------|--------------------------------------|-----------------------------|------------------------------------------|----------|----------|----------|
|            | (4 <i>R</i> *,6 <i>R</i> *)          | (4 <i>R</i> *,6 <i>S</i> *) | <b>A</b>                                 | <b>B</b> | <b>C</b> | <b>D</b> |
| $\Delta E$ | 2.50                                 | 2.31                        | 0.90                                     | 3.93     | 0.00     | 2.38     |
| $\Delta G$ | 6.78                                 | 6.96                        | 0.31                                     | 4.04     | 0.00     | 2.81     |

### *p*-Toluenesulfonic acid (TsOH)

#### MeCN solution

**Data 36:** Cartesian coordinates and energies of the optimized geometry for the most stable conformer of TsOH in MeCN solution.

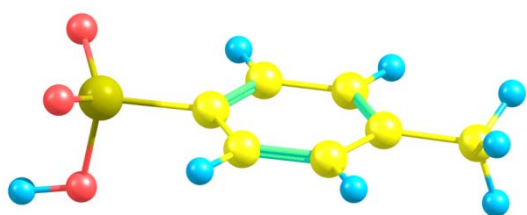

|                                              |                             |
|----------------------------------------------|-----------------------------|
| Electronic Energy =                          | -895.543591140 a.u.         |
| Zero-point correction=                       | 0.140670 (Hartree/Particle) |
| Thermal correction to Energy=                | 0.151746                    |
| Thermal correction to Enthalpy=              | 0.152690                    |
| Thermal correction to Gibbs Free Energy=     | 0.099908                    |
| Sum of electronic and zero-point Energies=   | -895.402922                 |
| Sum of electronic and thermal Energies=      | -895.391846                 |
| Sum of electronic and thermal Enthalpies=    | -895.390901                 |
| Sum of electronic and thermal Free Energies= | -895.443683                 |

Standard orientation:

| Center Number | Atomic Number | Atomic Type | Coordinates (Angstroms) |           |           |
|---------------|---------------|-------------|-------------------------|-----------|-----------|
|               |               |             | X                       | Y         | Z         |
| 1             | 6             | 0           | 0.560926                | -1.216873 | -0.066988 |
| 2             | 6             | 0           | -0.118436               | 0.000266  | -0.086807 |
| 3             | 6             | 0           | 0.561060                | 1.217217  | -0.066235 |
| 4             | 6             | 0           | 1.950912                | 1.205007  | -0.026641 |
| 5             | 6             | 0           | 2.666228                | 0.000044  | -0.000742 |
| 6             | 6             | 0           | 1.950688                | -1.204882 | -0.027367 |
| 7             | 6             | 0           | 4.170863                | -0.000323 | 0.073861  |
| 8             | 16            | 0           | -1.894979               | 0.000440  | -0.118263 |
| 9             | 8             | 0           | -2.398395               | 1.258481  | -0.664566 |
| 10            | 8             | 0           | -2.398841               | -1.254518 | -0.671293 |
| 11            | 8             | 0           | -2.165710               | -0.004074 | 1.502256  |
| 12            | 1             | 0           | -3.122489               | -0.007449 | 1.677410  |
| 13            | 1             | 0           | 0.016700                | -2.152090 | -0.093406 |
| 14            | 1             | 0           | 0.016921                | 2.152494  | -0.092004 |
| 15            | 1             | 0           | 2.487026                | 2.147287  | -0.018868 |
| 16            | 1             | 0           | 2.486685                | -2.147244 | -0.020148 |
| 17            | 1             | 0           | 4.592642                | -0.883396 | -0.409537 |
| 18            | 1             | 0           | 4.499795                | -0.008805 | 1.118553  |
| 19            | 1             | 0           | 4.592504                | 0.890325  | -0.395439 |

### EtOH solution

**Data 37:** Cartesian coordinates and energies of the optimized geometry for the most stable conformer of TsOH in EtOH solution.

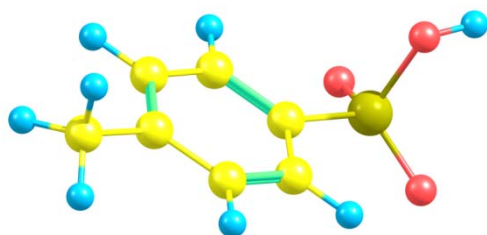

|                                              |                             |
|----------------------------------------------|-----------------------------|
| Electronic Energy =                          | -895.543331919 a.u.         |
| Zero-point correction=                       | 0.140676 (Hartree/Particle) |
| Thermal correction to Energy=                | 0.151755                    |
| Thermal correction to Enthalpy=              | 0.152699                    |
| Thermal correction to Gibbs Free Energy=     | 0.099691                    |
| Sum of electronic and zero-point Energies=   | -895.402656                 |
| Sum of electronic and thermal Energies=      | -895.391577                 |
| Sum of electronic and thermal Enthalpies=    | -895.390633                 |
| Sum of electronic and thermal Free Energies= | -895.443641                 |

Standard orientation:

| Center Number | Atomic Number | Atomic Type | Coordinates (Angstroms) |           |           |
|---------------|---------------|-------------|-------------------------|-----------|-----------|
|               |               |             | X                       | Y         | Z         |
| 1             | 6             | 0           | -0.560919               | 1.216835  | -0.066965 |
| 2             | 6             | 0           | 0.118438                | -0.000263 | -0.086731 |
| 3             | 6             | 0           | -0.561049               | -1.217175 | -0.066216 |
| 4             | 6             | 0           | -1.950901               | -1.204981 | -0.026657 |
| 5             | 6             | 0           | -2.666213               | -0.000045 | -0.000754 |
| 6             | 6             | 0           | -1.950679               | 1.204857  | -0.027379 |
| 7             | 6             | 0           | -4.170880               | 0.000322  | 0.073829  |
| 8             | 16            | 0           | 1.895060                | -0.000437 | -0.118431 |

|    |   |   |           |           |           |
|----|---|---|-----------|-----------|-----------|
| 9  | 8 | 0 | 2.398230  | -1.258580 | -0.664428 |
| 10 | 8 | 0 | 2.398681  | 1.254655  | -0.671079 |
| 11 | 8 | 0 | 2.165819  | 0.004029  | 1.502352  |
| 12 | 1 | 0 | 3.122650  | 0.007434  | 1.676963  |
| 13 | 1 | 0 | -0.016543 | 2.151962  | -0.093542 |
| 14 | 1 | 0 | -0.016760 | -2.152362 | -0.092147 |
| 15 | 1 | 0 | -2.487030 | -2.147266 | -0.018954 |
| 16 | 1 | 0 | -2.486693 | 2.147222  | -0.020226 |
| 17 | 1 | 0 | -4.592705 | 0.883300  | -0.409724 |
| 18 | 1 | 0 | -4.499935 | 0.008888  | 1.118483  |
| 19 | 1 | 0 | -4.592561 | -0.890311 | -0.395483 |

---

### Computational data for the reaction products

#### Triazepine-3-thione **8**

DMSO solution

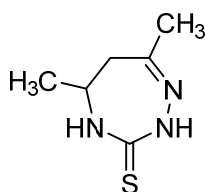

**Data 38:** Cartesian coordinates and energies of the optimized geometry for the 1<sup>st</sup> conformer of triazepine **8** in DMSO solution.

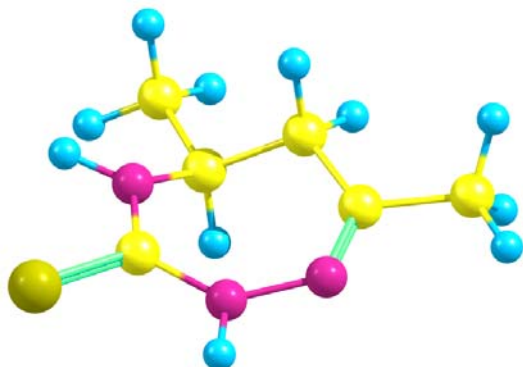

|                                              |                             |
|----------------------------------------------|-----------------------------|
| Electronic Energy =                          | -797.841513284 a.u.         |
| Zero-point correction=                       | 0.174778 (Hartree/Particle) |
| Thermal correction to Energy=                | 0.185145                    |
| Thermal correction to Enthalpy=              | 0.186089                    |
| Thermal correction to Gibbs Free Energy=     | 0.138525                    |
| Sum of electronic and zero-point Energies=   | -797.666736                 |
| Sum of electronic and thermal Energies=      | -797.656368                 |
| Sum of electronic and thermal Enthalpies=    | -797.655424                 |
| Sum of electronic and thermal Free Energies= | -797.702989                 |

Standard orientation:

| Center Number | Atomic Number | Atomic Type | Coordinates (Angstroms) |           |           |
|---------------|---------------|-------------|-------------------------|-----------|-----------|
|               |               |             | X                       | Y         | Z         |
| 1             | 7             | 0           | 0.795405                | -1.637450 | -0.257068 |
| 2             | 6             | 0           | 1.730211                | -0.820534 | 0.062136  |
| 3             | 6             | 0           | 1.651132                | 0.658068  | 0.342893  |
| 4             | 7             | 0           | -0.794756               | 0.946453  | 0.163480  |
| 5             | 6             | 0           | -1.337368               | -0.263817 | -0.018370 |
| 6             | 16            | 0           | -3.014820               | -0.531093 | 0.169729  |
| 7             | 7             | 0           | -0.549013               | -1.318232 | -0.387464 |
| 8             | 1             | 0           | -1.456112               | 1.658345  | 0.439211  |
| 9             | 1             | 0           | -1.082224               | -2.156587 | -0.563026 |
| 10            | 6             | 0           | 0.505922                | 1.401170  | -0.346530 |
| 11            | 1             | 0           | 2.599733                | 1.104511  | 0.030818  |
| 12            | 1             | 0           | 1.582108                | 0.812816  | 1.426042  |
| 13            | 1             | 0           | 0.542210                | 1.188408  | -1.420818 |
| 14            | 6             | 0           | 3.106837                | -1.423602 | 0.166868  |
| 15            | 1             | 0           | 3.541784                | -1.207633 | 1.148217  |
| 16            | 1             | 0           | 3.071982                | -2.502325 | 0.020678  |
| 17            | 1             | 0           | 3.772141                | -0.979570 | -0.581360 |
| 18            | 6             | 0           | 0.607944                | 2.910864  | -0.137507 |
| 19            | 1             | 0           | 0.572816                | 3.160193  | 0.926844  |
| 20            | 1             | 0           | 1.550073                | 3.280052  | -0.545272 |
| 21            | 1             | 0           | -0.206934               | 3.430979  | -0.646583 |

**Data 39:** Cartesian coordinates and energies of the optimized geometry for the 2<sup>nd</sup> conformer of triazepine **8** in DMSO solution.

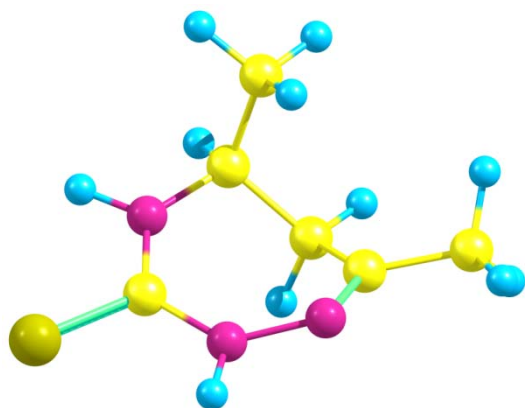

Electronic Energy = -797.841021309 a.u.  
 Zero-point correction= 0.175088 (Hartree/Particle)  
 Thermal correction to Energy= 0.185347  
 Thermal correction to Enthalpy= 0.186291  
 Thermal correction to Gibbs Free Energy= 0.139121  
 Sum of electronic and zero-point Energies= -797.665933  
 Sum of electronic and thermal Energies= -797.655674  
 Sum of electronic and thermal Enthalpies= -797.654730  
 Sum of electronic and thermal Free Energies= -797.701901

Standard orientation:

| Center Number | Atomic Number | Atomic Type | Coordinates (Angstroms) |           |           |
|---------------|---------------|-------------|-------------------------|-----------|-----------|
|               |               |             | X                       | Y         | Z         |
| 1             | 7             | 0           | -0.720080               | -1.527114 | -0.364226 |
| 2             | 6             | 0           | -1.641142               | -0.791035 | 0.137170  |
| 3             | 6             | 0           | -1.394113               | 0.386075  | 1.042599  |
| 4             | 6             | 0           | -0.574805               | 1.505035  | 0.383713  |
| 5             | 7             | 0           | 0.822882                | 1.083848  | 0.196154  |

|    |    |   |           |           |           |
|----|----|---|-----------|-----------|-----------|
| 6  | 6  | 0 | 1.366754  | -0.127035 | 0.022700  |
| 7  | 16 | 0 | 3.075937  | -0.297435 | -0.053990 |
| 8  | 7  | 0 | 0.623173  | -1.266086 | -0.095226 |
| 9  | 1  | 0 | -0.866593 | 0.038635  | 1.938104  |
| 10 | 1  | 0 | -2.347267 | 0.803057  | 1.369646  |
| 11 | 1  | 0 | -0.523090 | 2.333368  | 1.095024  |
| 12 | 1  | 0 | 1.512995  | 1.819375  | 0.252237  |
| 13 | 1  | 0 | 1.191514  | -2.065915 | -0.331718 |
| 14 | 6  | 0 | -3.059118 | -1.161428 | -0.186104 |
| 15 | 1  | 0 | -3.561913 | -0.335737 | -0.699681 |
| 16 | 1  | 0 | -3.097183 | -2.050481 | -0.814458 |
| 17 | 1  | 0 | -3.616280 | -1.346170 | 0.738271  |
| 18 | 6  | 0 | -1.190143 | 2.027400  | -0.918759 |
| 19 | 1  | 0 | -0.579843 | 2.834034  | -1.330252 |
| 20 | 1  | 0 | -1.262622 | 1.237704  | -1.670467 |
| 21 | 1  | 0 | -2.191141 | 2.422480  | -0.727682 |

### MeCN solution

**Data 40:** Cartesian coordinates and energies of the optimized geometry for the 1<sup>st</sup> conformer of triazepine **8** in MeCN solution.

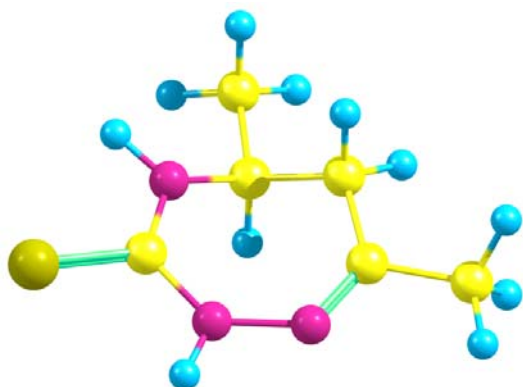

|                                              |                             |
|----------------------------------------------|-----------------------------|
| Electronic Energy =                          | -797.841337316 a.u.         |
| Zero-point correction=                       | 0.174783 (Hartree/Particle) |
| Thermal correction to Energy=                | 0.185148                    |
| Thermal correction to Enthalpy=              | 0.186092                    |
| Thermal correction to Gibbs Free Energy=     | 0.138547                    |
| Sum of electronic and zero-point Energies=   | -797.666554                 |
| Sum of electronic and thermal Energies=      | -797.656190                 |
| Sum of electronic and thermal Enthalpies=    | -797.655245                 |
| Sum of electronic and thermal Free Energies= | -797.702791                 |

Standard orientation:

| Center Number | Atomic Number | Atomic Type | Coordinates (Angstroms) |           |           |
|---------------|---------------|-------------|-------------------------|-----------|-----------|
|               |               |             | X                       | Y         | Z         |
| 1             | 7             | 0           | 0.795321                | -1.637033 | -0.257522 |
| 2             | 6             | 0           | 1.730174                | -0.820299 | 0.061909  |
| 3             | 6             | 0           | 1.651914                | 0.658704  | 0.341044  |
| 4             | 7             | 0           | -0.794240               | 0.945882  | 0.165884  |
| 5             | 6             | 0           | -1.337452               | -0.264009 | -0.018142 |
| 6             | 16            | 0           | -3.014421               | -0.531501 | 0.170129  |
| 7             | 7             | 0           | -0.548796               | -1.317492 | -0.389813 |
| 8             | 1             | 0           | -1.455486               | 1.657421  | 0.442771  |
| 9             | 1             | 0           | -1.081902               | -2.155758 | -0.566168 |

|    |   |   |           |           |           |
|----|---|---|-----------|-----------|-----------|
| 10 | 6 | 0 | 0.505260  | 1.401195  | -0.346501 |
| 11 | 1 | 0 | 2.599967  | 1.104549  | 0.026309  |
| 12 | 1 | 0 | 1.585452  | 0.814743  | 1.424179  |
| 13 | 1 | 0 | 0.539780  | 1.188251  | -1.420837 |
| 14 | 6 | 0 | 3.106391  | -1.424041 | 0.168638  |
| 15 | 1 | 0 | 3.540449  | -1.207595 | 1.150285  |
| 16 | 1 | 0 | 3.070973  | -2.502856 | 0.023313  |
| 17 | 1 | 0 | 3.772813  | -0.981108 | -0.579259 |
| 18 | 6 | 0 | 0.607012  | 2.910969  | -0.137938 |
| 19 | 1 | 0 | 0.573413  | 3.160503  | 0.926426  |
| 20 | 1 | 0 | 1.548352  | 3.280561  | -0.547182 |
| 21 | 1 | 0 | -0.208867 | 3.430680  | -0.645822 |

**Data 41:** Cartesian coordinates and energies of the optimized geometry for the 2<sup>nd</sup> conformer of triazepine **8** in MeCN solution.

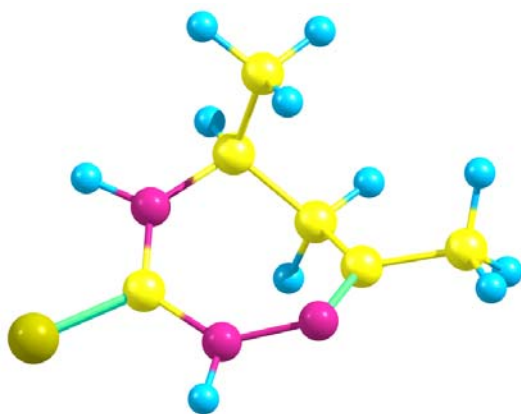

|                                              |                             |
|----------------------------------------------|-----------------------------|
| Electronic Energy =                          | -797.840823028 a.u.         |
| Zero-point correction=                       | 0.175081 (Hartree/Particle) |
| Thermal correction to Energy=                | 0.185342                    |
| Thermal correction to Enthalpy=              | 0.186286                    |
| Thermal correction to Gibbs Free Energy=     | 0.139098                    |
| Sum of electronic and zero-point Energies=   | -797.665742                 |
| Sum of electronic and thermal Energies=      | -797.655481                 |
| Sum of electronic and thermal Enthalpies=    | -797.654537                 |
| Sum of electronic and thermal Free Energies= | -797.701725                 |

Standard orientation:

| Center Number | Atomic Number | Atomic Type | Coordinates (Angstroms) |           |           |
|---------------|---------------|-------------|-------------------------|-----------|-----------|
|               |               |             | X                       | Y         | Z         |
| 1             | 7             | 0           | -0.720240               | -1.526953 | -0.364122 |
| 2             | 6             | 0           | -1.641247               | -0.790825 | 0.137233  |
| 3             | 6             | 0           | -1.394257               | 0.386447  | 1.042517  |
| 4             | 6             | 0           | -0.574600               | 1.505153  | 0.383603  |
| 5             | 7             | 0           | 0.823014                | 1.083807  | 0.196659  |
| 6             | 6             | 0           | 1.366929                | -0.127173 | 0.022789  |
| 7             | 16            | 0           | 3.075757                | -0.297656 | -0.053924 |
| 8             | 7             | 0           | 0.622996                | -1.266102 | -0.095505 |
| 9             | 1             | 0           | -0.866973               | 0.039127  | 1.938214  |
| 10            | 1             | 0           | -2.347476               | 0.803568  | 1.369264  |
| 11            | 1             | 0           | -0.523097               | 2.333728  | 1.094692  |
| 12            | 1             | 0           | 1.513308                | 1.819129  | 0.252941  |
| 13            | 1             | 0           | 1.191270                | -2.065826 | -0.332524 |
| 14            | 6             | 0           | -3.059272               | -1.161309 | -0.185869 |
| 15            | 1             | 0           | -3.562089               | -0.335830 | -0.699796 |
| 16            | 1             | 0           | -3.097273               | -2.050571 | -0.813917 |
| 17            | 1             | 0           | -3.616491               | -1.345796 | 0.738533  |
| 18            | 6             | 0           | -1.189579               | 2.027140  | -0.919214 |
| 19            | 1             | 0           | -0.578939               | 2.833352  | -1.331021 |



|    |   |   |           |          |           |
|----|---|---|-----------|----------|-----------|
| 20 | 1 | 0 | -1.262081 | 1.237118 | -1.670571 |
| 21 | 1 | 0 | -2.190518 | 2.422635 | -0.728593 |

### EtOH solution

**Data 42:** Cartesian coordinates and energies of the optimized geometry for the 1<sup>st</sup> conformer of triazepine **8** in EtOH solution.

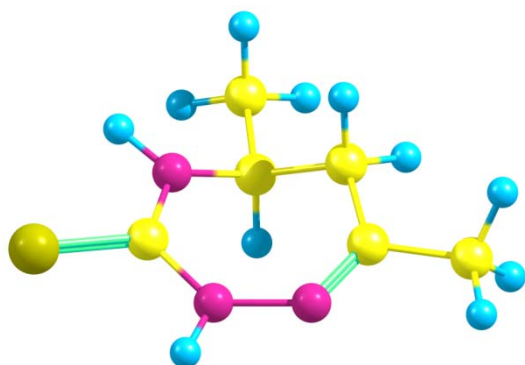

|                                              |                             |
|----------------------------------------------|-----------------------------|
| Electronic Energy =                          | -797.841020039 a.u.         |
| Zero-point correction=                       | 0.174793 (Hartree/Particle) |
| Thermal correction to Energy=                | 0.185153                    |
| Thermal correction to Enthalpy=              | 0.186097                    |
| Thermal correction to Gibbs Free Energy=     | 0.138587                    |
| Sum of electronic and zero-point Energies=   | -797.666227                 |
| Sum of electronic and thermal Energies=      | -797.655868                 |
| Sum of electronic and thermal Enthalpies=    | -797.654923                 |
| Sum of electronic and thermal Free Energies= | -797.702433                 |

Standard orientation:

| Center Number | Atomic Number | Atomic Type | Coordinates (Angstroms) |           |           |
|---------------|---------------|-------------|-------------------------|-----------|-----------|
|               |               |             | X                       | Y         | Z         |
| 1             | 7             | 0           | 0.795181                | -1.636325 | -0.258256 |
| 2             | 6             | 0           | 1.730113                | -0.819896 | 0.061540  |
| 3             | 6             | 0           | 1.653206                | 0.659777  | 0.337972  |
| 4             | 7             | 0           | -0.793362               | 0.944907  | 0.169935  |
| 5             | 6             | 0           | -1.337611               | -0.264351 | -0.017744 |
| 6             | 16            | 0           | -3.013732               | -0.532184 | 0.170770  |
| 7             | 7             | 0           | -0.548416               | -1.316263 | -0.393706 |
| 8             | 1             | 0           | -1.454470               | 1.655849  | 0.448649  |
| 9             | 1             | 0           | -1.081344               | -2.154386 | -0.571358 |
| 10            | 6             | 0           | 0.504135                | 1.401228  | -0.346440 |
| 11            | 1             | 0           | 2.600330                | 1.104635  | 0.018820  |
| 12            | 1             | 0           | 1.590988                | 0.817969  | 1.421065  |
| 13            | 1             | 0           | 0.535714                | 1.187966  | -1.420851 |
| 14            | 6             | 0           | 3.105655                | -1.424746 | 0.171550  |
| 15            | 1             | 0           | 3.538272                | -1.207501 | 1.153673  |
| 16            | 1             | 0           | 3.069286                | -2.503710 | 0.027671  |
| 17            | 1             | 0           | 3.773914                | -0.983655 | -0.575821 |
| 18            | 6             | 0           | 0.605422                | 2.911143  | -0.138668 |
| 19            | 1             | 0           | 0.574377                | 3.161036  | 0.925707  |
| 20            | 1             | 0           | 1.545433                | 3.281421  | -0.550384 |
| 21            | 1             | 0           | -0.212132               | 3.430163  | -0.644565 |

**Data 43:** Cartesian coordinates and energies of the optimized geometry for the 2<sup>nd</sup> conformer of triazepine **8** in EtOH solution.

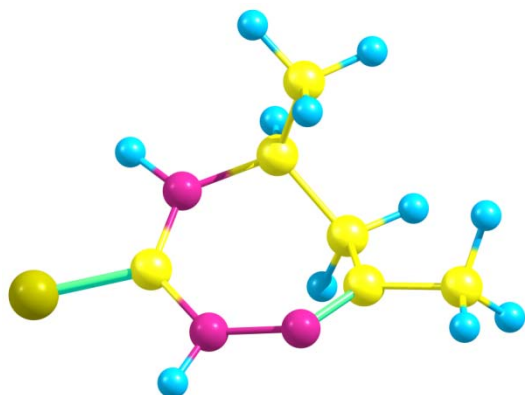

Electronic Energy = -797.840465591 a.u.  
 Zero-point correction= 0.175068 (Hartree/Particle)  
 Thermal correction to Energy= 0.185334  
 Thermal correction to Enthalpy= 0.186278  
 Thermal correction to Gibbs Free Energy= 0.139059  
 Sum of electronic and zero-point Energies= -797.665398  
 Sum of electronic and thermal Energies= -797.655132  
 Sum of electronic and thermal Enthalpies= -797.654188  
 Sum of electronic and thermal Free Energies= -797.701407

Standard orientation:

| Center Number | Atomic Number | Atomic Type | Coordinates (Angstroms) |           |           |
|---------------|---------------|-------------|-------------------------|-----------|-----------|
|               |               |             | X                       | Y         | Z         |
| 1             | 7             | 0           | 0.720518                | -1.526678 | 0.363901  |
| 2             | 6             | 0           | 1.641435                | -0.790452 | -0.137344 |
| 3             | 6             | 0           | 1.394528                | 0.387112  | -1.042372 |
| 4             | 6             | 0           | 0.574241                | 1.505361  | -0.383419 |
| 5             | 7             | 0           | -0.823248               | 1.083729  | -0.197603 |
| 6             | 6             | 0           | -1.367244               | -0.127423 | -0.022967 |
| 7             | 16            | 0           | -3.075429               | -0.298040 | 0.053856  |
| 8             | 7             | 0           | -0.622682               | -1.266150 | 0.095904  |
| 9             | 1             | 0           | 0.867678                | 0.040004  | -1.938418 |
| 10            | 1             | 0           | 2.347870                | 0.804482  | -1.368572 |
| 11            | 1             | 0           | 0.523125                | 2.334367  | -1.094113 |
| 12            | 1             | 0           | -1.513867               | 1.818688  | -0.254158 |
| 13            | 1             | 0           | -1.190839               | -2.065679 | 0.333872  |
| 14            | 6             | 0           | 3.059537                | -1.161080 | 0.185520  |
| 15            | 1             | 0           | 3.562347                | -0.336000 | 0.700151  |
| 16            | 1             | 0           | 3.097398                | -2.050747 | 0.812980  |
| 17            | 1             | 0           | 3.616926                | -1.345057 | -0.738903 |
| 18            | 6             | 0           | 1.188556                | 2.026675  | 0.920026  |
| 19            | 1             | 0           | 0.577337                | 2.832170  | 1.332362  |
| 20            | 1             | 0           | 1.261039                | 1.236082  | 1.670770  |
| 21            | 1             | 0           | 2.189412                | 2.422862  | 0.730251  |

## 14-Membered cyclic bis-thiosemicarbazone **6**

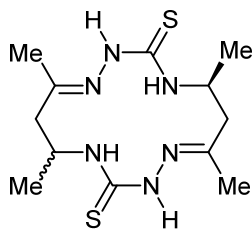

DMSO solution

**Data 44:** Cartesian coordinates and energies of the optimized geometry for the conformer **A** of macrocycle *cis-6* in DMSO solution.

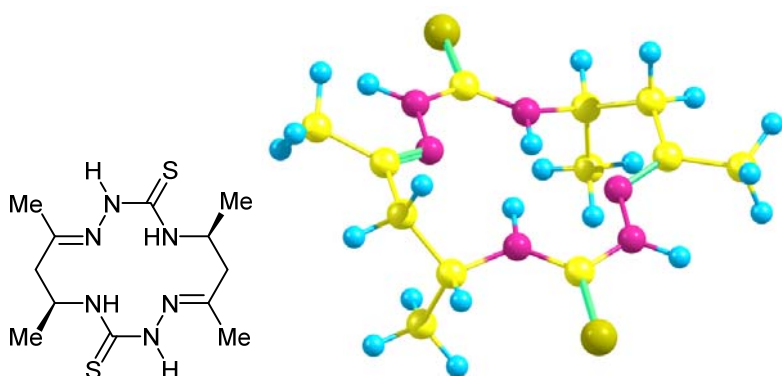

|                                              |                             |
|----------------------------------------------|-----------------------------|
| Electronic Energy =                          | -1595.69807706 a.u.         |
| Zero-point correction=                       | 0.349577 (Hartree/Particle) |
| Thermal correction to Energy=                | 0.372302                    |
| Thermal correction to Enthalpy=              | 0.373246                    |
| Thermal correction to Gibbs Free Energy=     | 0.296263                    |
| Sum of electronic and zero-point Energies=   | -1595.348500                |
| Sum of electronic and thermal Energies=      | -1595.325775                |
| Sum of electronic and thermal Enthalpies=    | -1595.324831                |
| Sum of electronic and thermal Free Energies= | -1595.401814                |

Standard orientation:

| Center Number | Atomic Number | Atomic Type | Coordinates (Angstroms) |           |           |
|---------------|---------------|-------------|-------------------------|-----------|-----------|
|               |               |             | X                       | Y         | Z         |
| 1             | 16            | 0           | -4.345222               | 0.668939  | 0.127934  |
| 2             | 16            | 0           | 4.345222                | -0.668941 | 0.127940  |
| 3             | 7             | 0           | -1.962126               | 1.780545  | -0.226050 |
| 4             | 1             | 0           | -2.508959               | 2.632172  | -0.248952 |
| 5             | 7             | 0           | -0.590706               | 1.792991  | -0.265602 |
| 6             | 7             | 0           | 1.903837                | 0.495390  | -0.013760 |
| 7             | 1             | 0           | 0.901253                | 0.378259  | -0.096683 |
| 8             | 7             | 0           | 1.962125                | -1.780546 | -0.226048 |
| 9             | 1             | 0           | 2.508959                | -2.632173 | -0.248953 |
| 10            | 7             | 0           | 0.590705                | -1.792991 | -0.265596 |
| 11            | 7             | 0           | -1.903835               | -0.495389 | -0.013753 |
| 12            | 1             | 0           | -0.901251               | -0.378258 | -0.096669 |
| 13            | 6             | 0           | -2.649473               | 0.608451  | -0.034263 |
| 14            | 6             | 0           | 0.029604                | 2.883398  | -0.544406 |
| 15            | 6             | 0           | -0.651114               | 4.184751  | -0.877046 |
| 16            | 1             | 0           | -1.515415               | 4.037092  | -1.530048 |
| 17            | 1             | 0           | 0.040168                | 4.862484  | -1.377243 |

|    |   |   |           |           |           |
|----|---|---|-----------|-----------|-----------|
| 18 | 1 | 0 | -0.998081 | 4.682667  | 0.035861  |
| 19 | 6 | 0 | 1.548852  | 2.863264  | -0.596220 |
| 20 | 1 | 0 | 1.903721  | 3.864867  | -0.338838 |
| 21 | 1 | 0 | 1.835469  | 2.709986  | -1.644894 |
| 22 | 6 | 0 | 2.320467  | 1.865158  | 0.291724  |
| 23 | 1 | 0 | 3.374672  | 1.942781  | 0.021831  |
| 24 | 6 | 0 | 2.172907  | 2.165947  | 1.789851  |
| 25 | 1 | 0 | 2.767565  | 1.462210  | 2.375766  |
| 26 | 1 | 0 | 1.131165  | 2.088771  | 2.109200  |
| 27 | 1 | 0 | 2.527682  | 3.176784  | 2.006987  |
| 28 | 6 | 0 | 2.649474  | -0.608451 | -0.034263 |
| 29 | 6 | 0 | -0.029605 | -2.883396 | -0.544407 |
| 30 | 6 | 0 | 0.651112  | -4.184747 | -0.877061 |
| 31 | 1 | 0 | 1.515412  | -4.037081 | -1.530064 |
| 32 | 1 | 0 | -0.040171 | -4.862475 | -1.377261 |
| 33 | 1 | 0 | 0.998082  | -4.682670 | 0.035840  |
| 34 | 6 | 0 | -1.548853 | -2.863265 | -0.596213 |
| 35 | 1 | 0 | -1.835474 | -2.709994 | -1.644887 |
| 36 | 1 | 0 | -1.903718 | -3.864868 | -0.338825 |
| 37 | 6 | 0 | -2.320466 | -1.865158 | 0.291730  |
| 38 | 1 | 0 | -3.374672 | -1.942779 | 0.021838  |
| 39 | 6 | 0 | -2.172906 | -2.165948 | 1.789857  |
| 40 | 1 | 0 | -2.767548 | -1.462199 | 2.375774  |
| 41 | 1 | 0 | -1.131161 | -2.088793 | 2.109202  |
| 42 | 1 | 0 | -2.527701 | -3.176777 | 2.006995  |

**Data 45:** Cartesian coordinates and energies of the optimized geometry for the conformer **B** of macrocycle *cis*-**6** in DMSO solution.

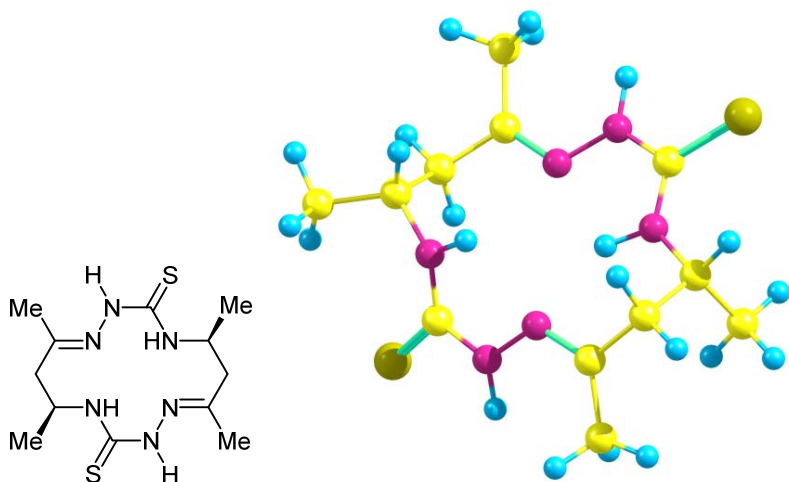

|                                              |                             |
|----------------------------------------------|-----------------------------|
| Electronic Energy =                          | -1595.68983017 a.u.         |
| Zero-point correction=                       | 0.350376 (Hartree/Particle) |
| Thermal correction to Energy=                | 0.372687                    |
| Thermal correction to Enthalpy=              | 0.373631                    |
| Thermal correction to Gibbs Free Energy=     | 0.298595                    |
| Sum of electronic and zero-point Energies=   | -1595.339454                |
| Sum of electronic and thermal Energies=      | -1595.317144                |
| Sum of electronic and thermal Enthalpies=    | -1595.316199                |
| Sum of electronic and thermal Free Energies= | -1595.391235                |

Standard orientation:

| Center Number | Atomic Number | Atomic Type | Coordinates (Angstroms) |          |           |
|---------------|---------------|-------------|-------------------------|----------|-----------|
|               |               |             | X                       | Y        | Z         |
| 1             | 16            | 0           | -3.913820               | 2.068807 | -0.064978 |
| 2             | 7             | 0           | -0.019474               | 1.725596 | 0.423821  |
| 3             | 7             | 0           | -1.285628               | 2.234853 | 0.267036  |
| 4             | 1             | 0           | -1.475500               | 3.229232 | 0.261042  |

|    |    |   |           |           |           |
|----|----|---|-----------|-----------|-----------|
| 5  | 7  | 0 | -2.058782 | 0.096002  | 0.062844  |
| 6  | 1  | 0 | -1.069578 | -0.126599 | 0.136615  |
| 7  | 6  | 0 | -2.355158 | 1.396504  | 0.097718  |
| 8  | 6  | 0 | -2.972276 | -1.020058 | -0.187754 |
| 9  | 1  | 0 | -3.830220 | -0.613078 | -0.724850 |
| 10 | 6  | 0 | -2.271490 | -2.031460 | -1.138781 |
| 11 | 1  | 0 | -2.976184 | -2.836622 | -1.353913 |
| 12 | 1  | 0 | -2.055248 | -1.516327 | -2.077079 |
| 13 | 6  | 0 | -0.983192 | -2.604306 | -0.583696 |
| 14 | 6  | 0 | -0.963085 | -3.950716 | 0.089781  |
| 15 | 1  | 0 | -0.752427 | -3.857540 | 1.161594  |
| 16 | 1  | 0 | -0.185721 | -4.589345 | -0.342845 |
| 17 | 1  | 0 | -1.919388 | -4.458944 | -0.017965 |
| 18 | 16 | 0 | 3.522364  | -1.637053 | 1.058129  |
| 19 | 7  | 0 | 0.044274  | -1.836447 | -0.687966 |
| 20 | 7  | 0 | 1.231790  | -2.207977 | -0.115440 |
| 21 | 1  | 0 | 1.290544  | -2.994305 | 0.522232  |
| 22 | 7  | 0 | 2.121913  | -0.214714 | -0.808190 |
| 23 | 1  | 0 | 1.235246  | -0.197580 | -1.301522 |
| 24 | 6  | 0 | 2.253767  | -1.287990 | -0.015544 |
| 25 | 6  | 0 | 2.815499  | 1.087481  | -0.745399 |
| 26 | 1  | 0 | 2.450135  | 1.606634  | -1.634617 |
| 27 | 6  | 0 | 2.362341  | 1.900120  | 0.502479  |
| 28 | 1  | 0 | 3.088111  | 2.696398  | 0.677203  |
| 29 | 1  | 0 | 2.385354  | 1.243440  | 1.374465  |
| 30 | 6  | 0 | 0.988646  | 2.518490  | 0.335873  |
| 31 | 6  | 0 | 0.890933  | 3.994713  | 0.048307  |
| 32 | 1  | 0 | 0.127757  | 4.216787  | -0.702637 |
| 33 | 1  | 0 | 0.635952  | 4.549788  | 0.958857  |
| 34 | 1  | 0 | 1.843859  | 4.380357  | -0.312745 |
| 35 | 6  | 0 | 4.338440  | 1.005264  | -0.877024 |
| 36 | 1  | 0 | 4.723496  | 2.006550  | -1.086347 |
| 37 | 1  | 0 | 4.809334  | 0.628525  | 0.028599  |
| 38 | 1  | 0 | 4.614313  | 0.352737  | -1.708516 |
| 39 | 6  | 0 | -3.461770 | -1.644178 | 1.123691  |
| 40 | 1  | 0 | -2.630449 | -2.022517 | 1.724029  |
| 41 | 1  | 0 | -3.994928 | -0.898146 | 1.716391  |
| 42 | 1  | 0 | -4.145731 | -2.471882 | 0.918955  |

**Data 46:** Cartesian coordinates and energies of the optimized geometry for the conformer **C** of macrocycle *cis*-**6** in DMSO solution.

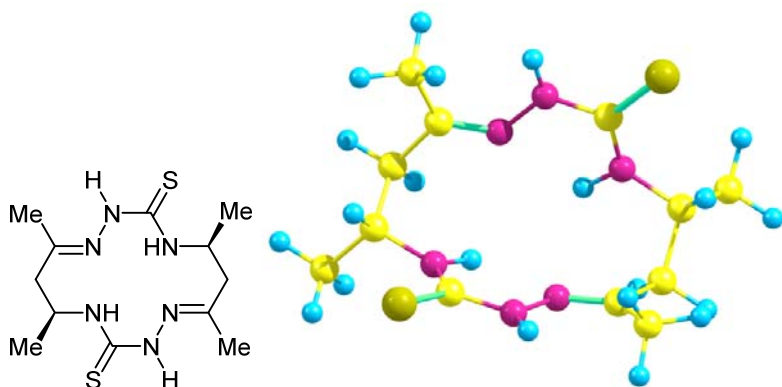

|                                              |                             |
|----------------------------------------------|-----------------------------|
| Electronic Energy =                          | -1595.70034522 a.u.         |
| Zero-point correction=                       | 0.350313 (Hartree/Particle) |
| Thermal correction to Energy=                | 0.372552                    |
| Thermal correction to Enthalpy=              | 0.373496                    |
| Thermal correction to Gibbs Free Energy=     | 0.299029                    |
| Sum of electronic and zero-point Energies=   | -1595.350032                |
| Sum of electronic and thermal Energies=      | -1595.327793                |
| Sum of electronic and thermal Enthalpies=    | -1595.326849                |
| Sum of electronic and thermal Free Energies= | -1595.401316                |

Standard orientation:

| Center Number | Atomic Number | Atomic Type | Coordinates (Angstroms) |           |           |
|---------------|---------------|-------------|-------------------------|-----------|-----------|
|               |               |             | X                       | Y         | Z         |
| 1             | 16            | 0           | 3.215073                | -1.677838 | -1.582953 |
| 2             | 16            | 0           | -3.215096               | 1.677877  | -1.582919 |
| 3             | 7             | 0           | -0.133685               | -1.845723 | 0.464632  |
| 4             | 7             | 0           | 0.887194                | -2.150277 | -0.399701 |
| 5             | 1             | 0           | 0.761744                | -2.771725 | -1.190010 |
| 6             | 7             | 0           | 2.127958                | -0.510138 | 0.605501  |
| 7             | 1             | 0           | 1.308248                | -0.462166 | 1.202422  |
| 8             | 7             | 0           | 0.133691                | 1.845710  | 0.464625  |
| 9             | 7             | 0           | -0.887188               | 2.150264  | -0.399706 |
| 10            | 1             | 0           | -0.761764               | 2.771773  | -1.189970 |
| 11            | 7             | 0           | -2.127952               | 0.510126  | 0.605494  |
| 12            | 1             | 0           | -1.308240               | 0.462148  | 1.202411  |
| 13            | 6             | 0           | 2.039459                | -1.405897 | -0.382961 |
| 14            | 6             | 0           | 3.117943                | 0.564228  | 0.731590  |
| 15            | 1             | 0           | 3.541778                | 0.719736  | -0.262443 |
| 16            | 6             | 0           | 2.386167                | 1.849438  | 1.197519  |
| 17            | 1             | 0           | 1.939090                | 1.664090  | 2.178130  |
| 18            | 1             | 0           | 3.133727                | 2.636625  | 1.320190  |
| 19            | 6             | 0           | 1.313252                | 2.300888  | 0.235482  |
| 20            | 6             | 0           | -2.039461               | 1.405902  | -0.382955 |
| 21            | 6             | 0           | -3.117938               | -0.564238 | 0.731577  |
| 22            | 1             | 0           | -3.541768               | -0.719744 | -0.262459 |
| 23            | 6             | 0           | -2.386168               | -1.849451 | 1.197507  |
| 24            | 1             | 0           | -1.939103               | -1.664107 | 2.178124  |
| 25            | 1             | 0           | -3.133732               | -2.636637 | 1.320166  |
| 26            | 6             | 0           | -1.313244               | -2.300901 | 0.235482  |
| 27            | 6             | 0           | 1.683844                | 3.173153  | -0.934775 |
| 28            | 1             | 0           | 1.331910                | 2.748889  | -1.880589 |
| 29            | 1             | 0           | 2.763954                | 3.296339  | -1.001927 |
| 30            | 1             | 0           | 1.240877                | 4.170274  | -0.832504 |
| 31            | 6             | 0           | -1.683823               | -3.173165 | -0.934782 |
| 32            | 1             | 0           | -1.331951               | -2.748852 | -1.880598 |
| 33            | 1             | 0           | -2.763927               | -3.296421 | -1.001899 |
| 34            | 1             | 0           | -1.240783               | -4.170258 | -0.832554 |
| 35            | 6             | 0           | 4.242072                | 0.185237  | 1.699951  |
| 36            | 1             | 0           | 4.742055                | -0.724858 | 1.363173  |
| 37            | 1             | 0           | 4.983464                | 0.986699  | 1.751273  |
| 38            | 1             | 0           | 3.848206                | 0.014011  | 2.705630  |
| 39            | 6             | 0           | -4.242072               | -0.185245 | 1.699936  |
| 40            | 1             | 0           | -3.848206               | -0.014016 | 2.705613  |
| 41            | 1             | 0           | -4.742054               | 0.724850  | 1.363158  |
| 42            | 1             | 0           | -4.983468               | -0.986704 | 1.751263  |

**Data 47:** Cartesian coordinates and energies of the optimized geometry for the conformer **A** of macrocycle *trans*-**6** in DMSO solution.

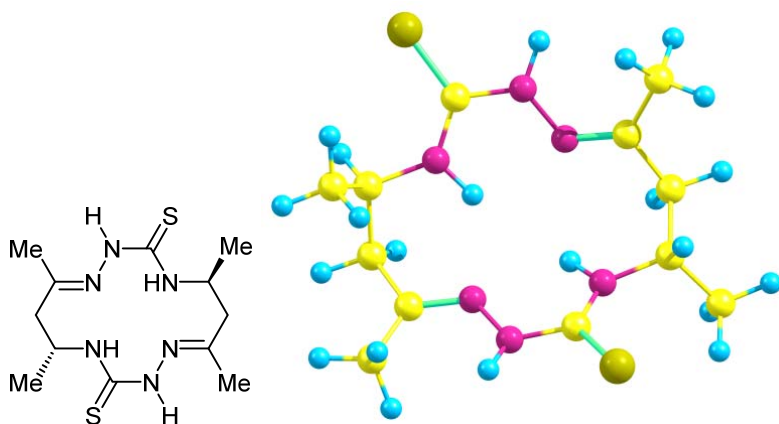

Electronic Energy = -1595.69547977 a.u.  
 Zero-point correction= 0.350254 (Hartree/Particle)  
 Thermal correction to Energy= 0.372498  
 Thermal correction to Enthalpy= 0.373442

Thermal correction to Gibbs Free Energy= 0.299192  
 Sum of electronic and zero-point Energies= -1595.345225  
 Sum of electronic and thermal Energies= -1595.322982  
 Sum of electronic and thermal Enthalpies= -1595.322038  
 Sum of electronic and thermal Free Energies= -1595.396288

Standard orientation:

| Center Number | Atomic Number | Atomic Type | Coordinates (Angstroms) |           |           |
|---------------|---------------|-------------|-------------------------|-----------|-----------|
|               |               |             | X                       | Y         | Z         |
| 1             | 16            | 0           | 3.458694                | -1.651808 | 1.386868  |
| 2             | 16            | 0           | -3.947234               | 1.953117  | 0.389401  |
| 3             | 7             | 0           | 1.218283                | -2.192444 | 0.077475  |
| 4             | 1             | 0           | 1.242974                | -3.015054 | 0.669062  |
| 5             | 7             | 0           | 0.077794                | -1.819760 | -0.584122 |
| 6             | 7             | 0           | -2.044475               | 0.131425  | -0.247899 |
| 7             | 1             | 0           | -1.052831               | -0.049257 | -0.381214 |
| 8             | 7             | 0           | -1.314022               | 2.249531  | 0.178849  |
| 9             | 1             | 0           | -1.542148               | 3.213640  | 0.389036  |
| 10            | 7             | 0           | -0.100174               | 1.916405  | -0.386918 |
| 11            | 7             | 0           | 2.120645                | -0.143214 | -0.419156 |
| 12            | 1             | 0           | 1.281313                | -0.056374 | -0.981935 |
| 13            | 6             | 0           | 2.220696                | -1.273101 | 0.285628  |
| 14            | 6             | 0           | -0.925331               | -2.624834 | -0.624829 |
| 15            | 6             | 0           | -0.915562               | -4.006755 | -0.027835 |
| 16            | 1             | 0           | -0.083925               | -4.596581 | -0.427692 |
| 17            | 1             | 0           | -1.841918               | -4.535441 | -0.243342 |
| 18            | 1             | 0           | -0.797155               | -3.968979 | 1.061429  |
| 19            | 6             | 0           | -2.179818               | -2.072397 | -1.279005 |
| 20            | 1             | 0           | -2.870887               | -2.887459 | -1.496363 |
| 21            | 1             | 0           | -1.914558               | -1.603122 | -2.229680 |
| 22            | 6             | 0           | -2.929346               | -1.027134 | -0.409682 |
| 23            | 1             | 0           | -3.806747               | -0.699742 | -0.972648 |
| 24            | 6             | 0           | -3.387450               | -1.593169 | 0.939592  |
| 25            | 1             | 0           | -3.939058               | -0.836388 | 1.497990  |
| 26            | 1             | 0           | -2.535986               | -1.914266 | 1.544993  |
| 27            | 1             | 0           | -4.045516               | -2.451715 | 0.781768  |
| 28            | 6             | 0           | -2.373147               | 1.381654  | 0.077804  |
| 29            | 6             | 0           | 0.931499                | 2.633173  | -0.116952 |
| 30            | 6             | 0           | 0.950913                | 3.803344  | 0.826435  |
| 31            | 1             | 0           | 0.692916                | 4.728867  | 0.297912  |
| 32            | 1             | 0           | 1.950404                | 3.937761  | 1.241958  |
| 33            | 1             | 0           | 0.244167                | 3.675083  | 1.649054  |
| 34            | 6             | 0           | 2.204283                | 2.264110  | -0.854147 |
| 35            | 1             | 0           | 1.964301                | 2.073019  | -1.904454 |
| 36            | 1             | 0           | 2.884613                | 3.117304  | -0.835233 |
| 37            | 6             | 0           | 2.978970                | 1.043966  | -0.305362 |
| 38            | 1             | 0           | 3.200765                | 1.188130  | 0.755669  |
| 39            | 6             | 0           | 4.293687                | 0.868056  | -1.073994 |
| 40            | 1             | 0           | 4.933671                | 1.741539  | -0.925683 |
| 41            | 1             | 0           | 4.828188                | -0.013575 | -0.719771 |
| 42            | 1             | 0           | 4.101338                | 0.756574  | -2.144688 |

**Data 48:** Cartesian coordinates and energies of the optimized geometry for the conformer **B** of macrocycle *trans*-**6** in DMSO solution.

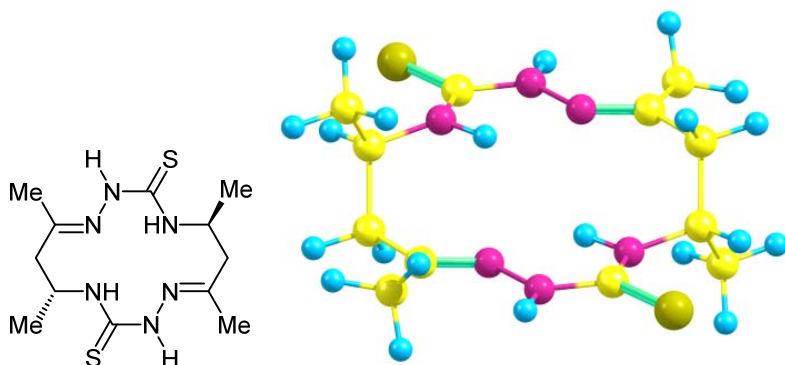

Electronic Energy = -1595.69814555 a.u.  
 Zero-point correction= 0.350356 (Hartree/Particle)  
 Thermal correction to Energy= 0.372654  
 Thermal correction to Enthalpy= 0.373598  
 Thermal correction to Gibbs Free Energy= 0.298471  
 Sum of electronic and zero-point Energies= -1595.347789  
 Sum of electronic and thermal Energies= -1595.325492  
 Sum of electronic and thermal Enthalpies= -1595.324548  
 Sum of electronic and thermal Free Energies= -1595.399674

Standard orientation:

| Center Number | Atomic Number | Atomic Type | Coordinates (Angstroms) |           |           |
|---------------|---------------|-------------|-------------------------|-----------|-----------|
|               |               |             | X                       | Y         | Z         |
| 1             | 16            | 0           | -3.952317               | -1.743878 | 0.500516  |
| 2             | 7             | 0           | -0.175152               | -1.767873 | -0.579589 |
| 3             | 7             | 0           | -1.433575               | -2.160372 | -0.210366 |
| 4             | 1             | 0           | -1.651827               | -3.112313 | 0.058178  |
| 5             | 7             | 0           | -2.094130               | 0.022336  | -0.392508 |
| 6             | 1             | 0           | -1.119927               | 0.145881  | -0.652143 |
| 7             | 6             | 0           | -2.429309               | -1.229200 | -0.062204 |
| 8             | 6             | 0           | -2.864482               | 1.238179  | -0.126511 |
| 9             | 1             | 0           | -3.814479               | 0.911710  | 0.296127  |
| 10            | 6             | 0           | -2.148867               | 2.087715  | 0.961731  |
| 11            | 1             | 0           | -2.803672               | 2.921934  | 1.221566  |
| 12            | 1             | 0           | -2.040041               | 1.465390  | 1.852747  |
| 13            | 6             | 0           | -0.787416               | 2.621298  | 0.559658  |
| 14            | 6             | 0           | -0.622623               | 4.064428  | 0.159529  |
| 15            | 1             | 0           | -0.165890               | 4.154766  | -0.832059 |
| 16            | 1             | 0           | 0.024982                | 4.591551  | 0.869573  |
| 17            | 1             | 0           | -1.580882               | 4.579734  | 0.137386  |
| 18            | 16            | 0           | 3.952310                | 1.743870  | -0.500548 |
| 19            | 7             | 0           | 0.175156                | 1.767878  | 0.579594  |
| 20            | 7             | 0           | 1.433577                | 2.160373  | 0.210360  |
| 21            | 1             | 0           | 1.651825                | 3.112309  | -0.058204 |
| 22            | 7             | 0           | 2.094136                | -0.022332 | 0.392528  |
| 23            | 1             | 0           | 1.119936                | -0.145874 | 0.652176  |
| 24            | 6             | 0           | 2.429310                | 1.229200  | 0.062200  |
| 25            | 6             | 0           | 2.864484                | -1.238178 | 0.126532  |
| 26            | 1             | 0           | 3.814485                | -0.911712 | -0.296098 |
| 27            | 6             | 0           | 2.148873                | -2.087707 | -0.961719 |
| 28            | 1             | 0           | 2.803679                | -2.921926 | -1.221555 |
| 29            | 1             | 0           | 2.040051                | -1.465378 | -1.852732 |
| 30            | 6             | 0           | 0.787420                | -2.621293 | -0.559654 |
| 31            | 6             | 0           | 0.622626                | -4.064426 | -0.159535 |
| 32            | 1             | 0           | 0.165880                | -4.154771 | 0.832046  |
| 33            | 1             | 0           | -0.024967               | -4.591548 | -0.869592 |
| 34            | 1             | 0           | 1.580887                | -4.579728 | -0.137382 |
| 35            | 6             | 0           | 3.127822                | -2.000968 | 1.427568  |
| 36            | 1             | 0           | 2.196457                | -2.293707 | 1.920371  |
| 37            | 1             | 0           | 3.706743                | -2.905547 | 1.225732  |
| 38            | 1             | 0           | 3.695657                | -1.377658 | 2.121454  |
| 39            | 6             | 0           | -3.127834               | 2.000963  | -1.427548 |
| 40            | 1             | 0           | -2.196475               | 2.293706  | -1.920359 |
| 41            | 1             | 0           | -3.695670               | 1.377647  | -2.121428 |
| 42            | 1             | 0           | -3.706759               | 2.905539  | -1.225711 |

**Data 49:** Cartesian coordinates and energies of the optimized geometry for the conformer **C** of macrocycle *trans*-**6** in DMSO solution.



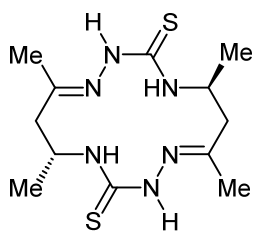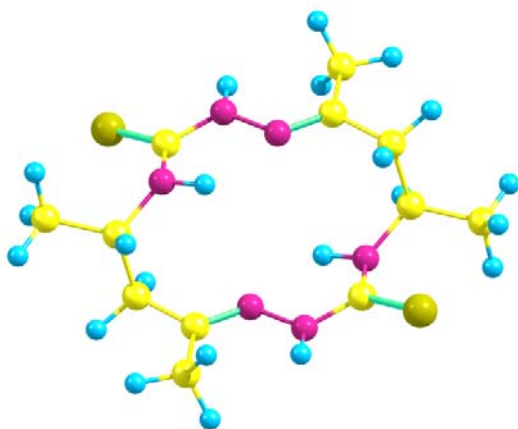

Electronic Energy = -1595.67959839 a.u.  
 Zero-point correction= 0.351025 (Hartree/Particle)  
 Thermal correction to Energy= 0.373036  
 Thermal correction to Enthalpy= 0.373981  
 Thermal correction to Gibbs Free Energy= 0.299833  
 Sum of electronic and zero-point Energies= -1595.328573  
 Sum of electronic and thermal Energies= -1595.306562  
 Sum of electronic and thermal Enthalpies= -1595.305618  
 Sum of electronic and thermal Free Energies= -1595.379765

Standard orientation:

| Center Number | Atomic Number | Atomic Type | Coordinates (Angstroms) |           |           |
|---------------|---------------|-------------|-------------------------|-----------|-----------|
|               |               |             | X                       | Y         | Z         |
| 1             | 16            | 0           | -3.652517               | 1.876042  | -0.673922 |
| 2             | 7             | 0           | -0.010591               | 1.687262  | 0.712375  |
| 3             | 7             | 0           | -1.248034               | 2.168896  | 0.352106  |
| 4             | 1             | 0           | -1.340763               | 3.044080  | -0.151197 |
| 5             | 7             | 0           | -2.160205               | 0.115079  | 0.797860  |
| 6             | 1             | 0           | -1.229375               | -0.005273 | 1.186790  |
| 7             | 6             | 0           | -2.310765               | 1.307943  | 0.201907  |
| 8             | 6             | 0           | -2.882396               | -1.152796 | 0.567830  |
| 9             | 1             | 0           | -2.565927               | -1.773908 | 1.409594  |
| 10            | 6             | 0           | -2.371468               | -1.829350 | -0.742914 |
| 11            | 1             | 0           | -3.080542               | -2.606759 | -1.035613 |
| 12            | 1             | 0           | -2.338605               | -1.083304 | -1.538750 |
| 13            | 6             | 0           | -1.011626               | -2.442623 | -0.517602 |
| 14            | 6             | 0           | -0.934072               | -3.842937 | 0.039696  |
| 15            | 1             | 0           | -0.486059               | -3.855956 | 1.039826  |
| 16            | 1             | 0           | -0.322544               | -4.484873 | -0.603210 |
| 17            | 1             | 0           | -1.924397               | -4.289064 | 0.114557  |
| 18            | 16            | 0           | 3.652519                | -1.876034 | 0.673927  |
| 19            | 7             | 0           | 0.010594                | -1.687269 | -0.712376 |
| 20            | 7             | 0           | 1.248037                | -2.168900 | -0.352104 |
| 21            | 1             | 0           | 1.340769                | -3.044084 | 0.151200  |
| 22            | 7             | 0           | 2.160203                | -0.115084 | -0.797867 |
| 23            | 1             | 0           | 1.229374                | 0.005263  | -1.186799 |
| 24            | 6             | 0           | 2.310766                | -1.307944 | -0.201906 |
| 25            | 6             | 0           | 2.882390                | 1.152795  | -0.567840 |
| 26            | 1             | 0           | 2.565909                | 1.773906  | -1.409600 |
| 27            | 6             | 0           | 2.371472                | 1.829343  | 0.742910  |
| 28            | 1             | 0           | 3.080549                | 2.606749  | 1.035608  |
| 29            | 1             | 0           | 2.338615                | 1.083294  | 1.538743  |
| 30            | 6             | 0           | 1.011629                | 2.442620  | 0.517612  |
| 31            | 6             | 0           | 0.934072                | 3.842941  | -0.039666 |
| 32            | 1             | 0           | 0.486101                | 3.855966  | -1.039815 |
| 33            | 1             | 0           | 0.322503                | 4.484856  | 0.603222  |
| 34            | 1             | 0           | 1.924391                | 4.289088  | -0.114479 |
| 35            | 6             | 0           | -4.407825               | -1.070663 | 0.640213  |
| 36            | 1             | 0           | -4.798091               | -2.087096 | 0.737968  |
| 37            | 1             | 0           | -4.721659               | -0.498664 | 1.515845  |
| 38            | 1             | 0           | -4.840801               | -0.610256 | -0.244805 |

|    |   |   |          |          |           |
|----|---|---|----------|----------|-----------|
| 39 | 6 | 0 | 4.407819 | 1.070670 | -0.640242 |
| 40 | 1 | 0 | 4.798079 | 2.087106 | -0.737997 |
| 41 | 1 | 0 | 4.840808 | 0.610262 | 0.244770  |
| 42 | 1 | 0 | 4.721645 | 0.498677 | -1.515879 |

**Data 50:** Cartesian coordinates and energies of the optimized geometry for the conformer **D** of macrocycle *trans*-6 in DMSO solution.

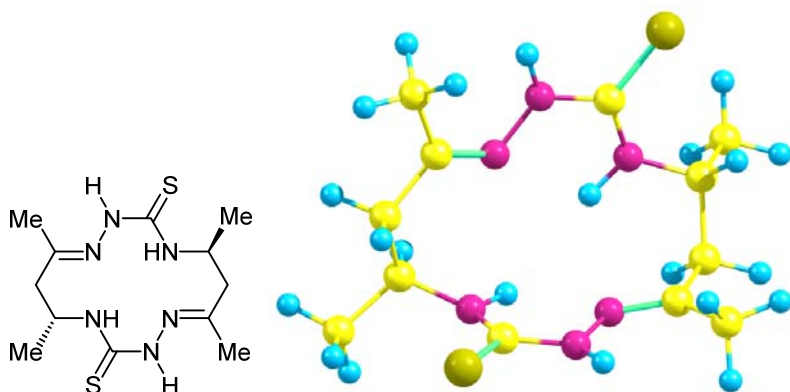

|                                              |                             |
|----------------------------------------------|-----------------------------|
| Electronic Energy =                          | -1595.69180287 a.u.         |
| Zero-point correction=                       | 0.350015 (Hartree/Particle) |
| Thermal correction to Energy=                | 0.372390                    |
| Thermal correction to Enthalpy=              | 0.373334                    |
| Thermal correction to Gibbs Free Energy=     | 0.298779                    |
| Sum of electronic and zero-point Energies=   | -1595.341788                |
| Sum of electronic and thermal Energies=      | -1595.319413                |
| Sum of electronic and thermal Enthalpies=    | -1595.318469                |
| Sum of electronic and thermal Free Energies= | -1595.393024                |

Standard orientation:

| Center Number | Atomic Number | Atomic Type | Coordinates (Angstroms) |           |           |
|---------------|---------------|-------------|-------------------------|-----------|-----------|
|               |               |             | X                       | Y         | Z         |
| 1             | 6             | 0           | -2.087124               | -1.349258 | 0.247575  |
| 2             | 16            | 0           | -3.361464               | -1.341543 | 1.372144  |
| 3             | 7             | 0           | -0.992559               | -2.147127 | 0.502291  |
| 4             | 7             | 0           | 0.119008                | -2.013606 | -0.284431 |
| 5             | 6             | 0           | 1.257835                | -2.464381 | 0.102159  |
| 6             | 7             | 0           | -2.009653               | -0.662096 | -0.897063 |
| 7             | 6             | 0           | -2.754408               | 0.530702  | -1.341156 |
| 8             | 6             | 0           | 2.079102                | 1.426457  | 0.142652  |
| 9             | 16            | 0           | 3.454898                | 2.044365  | 0.936218  |
| 10            | 7             | 0           | 0.920578                | 2.155121  | 0.184566  |
| 11            | 7             | 0           | -0.273553               | 1.634640  | -0.265338 |
| 12            | 6             | 0           | -1.354182               | 2.236628  | 0.084217  |
| 13            | 6             | 0           | -2.698584               | 1.700282  | -0.347404 |
| 14            | 7             | 0           | 2.028347                | 0.271013  | -0.528679 |
| 15            | 6             | 0           | 3.069399                | -0.768005 | -0.544515 |
| 16            | 1             | 0           | -0.971084               | -2.615339 | 1.401102  |
| 17            | 1             | 0           | -1.124439               | -0.800617 | -1.369850 |
| 18            | 1             | 0           | 0.953215                | 2.993562  | 0.751835  |
| 19            | 1             | 0           | 1.107722                | 0.011015  | -0.866953 |
| 20            | 6             | 0           | 2.403441                | -2.140288 | -0.827884 |
| 21            | 1             | 0           | -2.215047               | 0.837589  | -2.240129 |
| 22            | 1             | 0           | -3.251360               | 1.438402  | 0.562507  |
| 23            | 1             | 0           | -3.255413               | 2.532651  | -0.793931 |
| 24            | 1             | 0           | 3.527051                | -0.780165 | 0.448216  |
| 25            | 1             | 0           | 2.031767                | -2.139193 | -1.855943 |
| 26            | 1             | 0           | 3.179656                | -2.904698 | -0.757590 |
| 27            | 6             | 0           | -1.389450               | 3.470084  | 0.954266  |
| 28            | 1             | 0           | -0.888398               | 3.295110  | 1.912138  |
| 29            | 1             | 0           | -0.891450               | 4.313868  | 0.464347  |

|    |   |   |           |           |           |
|----|---|---|-----------|-----------|-----------|
| 30 | 1 | 0 | -2.416085 | 3.766744  | 1.163866  |
| 31 | 6 | 0 | 1.499975  | -3.186304 | 1.399143  |
| 32 | 1 | 0 | 0.991123  | -4.156574 | 1.404837  |
| 33 | 1 | 0 | 2.562942  | -3.364922 | 1.554595  |
| 34 | 1 | 0 | 1.123536  | -2.611248 | 2.251865  |
| 35 | 6 | 0 | 4.151412  | -0.479635 | -1.589472 |
| 36 | 1 | 0 | 4.621823  | 0.484729  | -1.395114 |
| 37 | 1 | 0 | 4.923050  | -1.253195 | -1.553051 |
| 38 | 1 | 0 | 3.721896  | -0.465917 | -2.594944 |
| 39 | 6 | 0 | -4.196152 | 0.208837  | -1.749948 |
| 40 | 1 | 0 | -4.208994 | -0.607838 | -2.475027 |
| 41 | 1 | 0 | -4.797491 | -0.081808 | -0.888170 |
| 42 | 1 | 0 | -4.651710 | 1.086370  | -2.215613 |

**Table 15** Relative electronic ( $\Delta E$ , kcal/mol) and Gibbs free energies ( $\Delta G$ , kcal/mol) of various conformers of *cis*- and *trans*-**6** in DMSO solution

| Conformer | <i>cis</i> - <b>6</b> |            | <i>trans</i> - <b>6</b> |            |
|-----------|-----------------------|------------|-------------------------|------------|
|           | $\Delta E$            | $\Delta G$ | $\Delta E$              | $\Delta G$ |
| <b>A</b>  | 1.42                  | 0.00       | 3.05                    | 3.47       |
| <b>B</b>  | 6.60                  | 6.64       | 1.38                    | 1.34       |
| <b>C</b>  | 0.00                  | 0.31       | 13.02                   | 13.83      |
| <b>D</b>  |                       |            | 5.36                    | 5.51       |

**Table 16** Experimental  $^{13}\text{C}$  chemical shifts of *cis*- and *trans*-**6** (DMSO- $d_6$ ) and calculated  $^{13}\text{C}$  chemical shifts for the most stable conformers of *cis*- and *trans*-**6** in DMSO solution<sup>a</sup>

| $^{13}\text{C}$ assignment | Calculated shift, ppm                       |                                               | Observed shift, ppm |              |
|----------------------------|---------------------------------------------|-----------------------------------------------|---------------------|--------------|
|                            | <i>cis</i> - <b>6</b><br>Conformer <b>C</b> | <i>trans</i> - <b>6</b><br>Conformer <b>B</b> | Major isomer        | Minor isomer |
| CH-N                       | 44.92                                       | 44.99                                         | 47.65               | 47.27        |
| CH <sub>2</sub> C=N        | 43.49                                       | 40.84                                         | 43.27               | 41.06        |
| CH <sub>3</sub> -C=N       | 14.68                                       | 17.69                                         | 17.09               | 20.41        |

<sup>a</sup> Calculations were performed by the GIAO method at the WC04/6-311+G(2d,p) level of theory using the DFT B3LYP/6-311++G(d,p) optimized geometries.

## MeCN solution

**Data 51:** Cartesian coordinates and energies of the optimized geometry for the conformer **A** of macrocycle *cis*-**6** in MeCN solution.

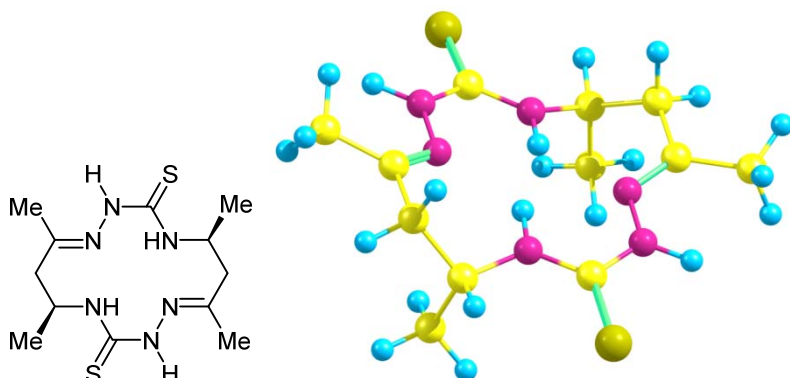

|                                              |                             |
|----------------------------------------------|-----------------------------|
| Electronic Energy =                          | -1595.69779870 a.u.         |
| Zero-point correction=                       | 0.349575 (Hartree/Particle) |
| Thermal correction to Energy=                | 0.372306                    |
| Thermal correction to Enthalpy=              | 0.373250                    |
| Thermal correction to Gibbs Free Energy=     | 0.296213                    |
| Sum of electronic and zero-point Energies=   | -1595.348224                |
| Sum of electronic and thermal Energies=      | -1595.325492                |
| Sum of electronic and thermal Enthalpies=    | -1595.324548                |
| Sum of electronic and thermal Free Energies= | -1595.401585                |

Standard orientation:

| Center Number | Atomic Number | Atomic Type | Coordinates (Angstroms) |           |           |
|---------------|---------------|-------------|-------------------------|-----------|-----------|
|               |               |             | X                       | Y         | Z         |
| 1             | 16            | 0           | -4.345237               | 0.668227  | 0.127328  |
| 2             | 16            | 0           | 4.345237                | -0.668227 | 0.127319  |
| 3             | 7             | 0           | -1.962392               | 1.780227  | -0.226358 |
| 4             | 1             | 0           | -2.509529               | 2.631645  | -0.249595 |
| 5             | 7             | 0           | -0.591077               | 1.792988  | -0.265746 |
| 6             | 7             | 0           | 1.903736                | 0.495739  | -0.014113 |
| 7             | 1             | 0           | 0.901188                | 0.378394  | -0.096887 |
| 8             | 7             | 0           | 1.962391                | -1.780226 | -0.226363 |
| 9             | 1             | 0           | 2.509529                | -2.631645 | -0.249602 |
| 10            | 7             | 0           | 0.591077                | -1.792988 | -0.265748 |
| 11            | 7             | 0           | -1.903736               | -0.495739 | -0.014109 |
| 12            | 1             | 0           | -0.901188               | -0.378394 | -0.096885 |
| 13            | 6             | 0           | -2.649756               | 0.607943  | -0.034645 |
| 14            | 6             | 0           | 0.029111                | 2.883632  | -0.543874 |
| 15            | 6             | 0           | -0.652107               | 4.184964  | -0.875804 |
| 16            | 1             | 0           | -1.515025               | 4.037418  | -1.530707 |
| 17            | 1             | 0           | 0.039409                | 4.864150  | -1.373688 |
| 18            | 1             | 0           | -1.001472               | 4.681205  | 0.037111  |
| 19            | 6             | 0           | 1.548378                | 2.863742  | -0.595839 |
| 20            | 1             | 0           | 1.903167                | 3.865308  | -0.338161 |
| 21            | 1             | 0           | 1.834985                | 2.710806  | -1.644576 |
| 22            | 6             | 0           | 2.320235                | 1.865427  | 0.291694  |
| 23            | 1             | 0           | 3.374406                | 1.943180  | 0.021682  |
| 24            | 6             | 0           | 2.172949                | 2.165760  | 1.789944  |
| 25            | 1             | 0           | 2.768004                | 1.462014  | 2.375427  |
| 26            | 1             | 0           | 1.131309                | 2.088177  | 2.109551  |
| 27            | 1             | 0           | 2.527540                | 3.176610  | 2.007373  |
| 28            | 6             | 0           | 2.649756                | -0.607943 | -0.034650 |
| 29            | 6             | 0           | -0.029112               | -2.883631 | -0.543877 |
| 30            | 6             | 0           | 0.652105                | -4.184963 | -0.875811 |
| 31            | 1             | 0           | 1.515022                | -4.037416 | -1.530715 |

|    |   |   |           |           |           |
|----|---|---|-----------|-----------|-----------|
| 32 | 1 | 0 | -0.039412 | -4.864148 | -1.373694 |
| 33 | 1 | 0 | 1.001472  | -4.681206 | 0.037103  |
| 34 | 6 | 0 | -1.548380 | -2.863742 | -0.595838 |
| 35 | 1 | 0 | -1.834989 | -2.710806 | -1.644575 |
| 36 | 1 | 0 | -1.903167 | -3.865308 | -0.338160 |
| 37 | 6 | 0 | -2.320234 | -1.865427 | 0.291697  |
| 38 | 1 | 0 | -3.374406 | -1.943180 | 0.021687  |
| 39 | 6 | 0 | -2.172946 | -2.165761 | 1.789947  |
| 40 | 1 | 0 | -2.767999 | -1.462016 | 2.375431  |
| 41 | 1 | 0 | -1.131305 | -2.088178 | 2.109551  |
| 42 | 1 | 0 | -2.527536 | -3.176612 | 2.007375  |

**Data 52:** Cartesian coordinates and energies of the optimized geometry for the conformer **B** of macrocycle *cis-6* in MeCN solution.

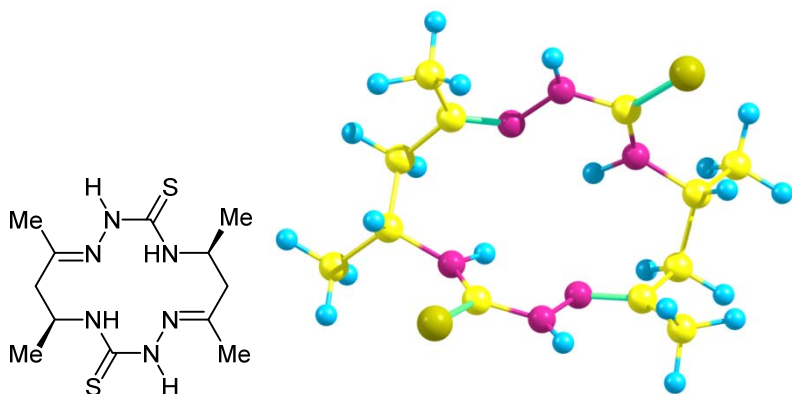

|                                              |                             |
|----------------------------------------------|-----------------------------|
| Electronic Energy =                          | -1595.70006762 a.u.         |
| Zero-point correction=                       | 0.350315 (Hartree/Particle) |
| Thermal correction to Energy=                | 0.372557                    |
| Thermal correction to Enthalpy=              | 0.373501                    |
| Thermal correction to Gibbs Free Energy=     | 0.299010                    |
| Sum of electronic and zero-point Energies=   | -1595.349753                |
| Sum of electronic and thermal Energies=      | -1595.327511                |
| Sum of electronic and thermal Enthalpies=    | -1595.326567                |
| Sum of electronic and thermal Free Energies= | -1595.401057                |

Standard orientation:

| Center Number | Atomic Number | Atomic Type | Coordinates (Angstroms) |           |           |
|---------------|---------------|-------------|-------------------------|-----------|-----------|
|               |               |             | X                       | Y         | Z         |
| 1             | 16            | 0           | -3.214417               | 1.677823  | -1.583108 |
| 2             | 16            | 0           | 3.214415                | -1.677830 | -1.583104 |
| 3             | 7             | 0           | 0.133938                | 1.845659  | 0.464816  |
| 4             | 7             | 0           | -0.886911               | 2.150385  | -0.399382 |
| 5             | 1             | 0           | -0.761163               | 2.771125  | -1.190195 |
| 6             | 7             | 0           | -2.128061               | 0.510439  | 0.605784  |
| 7             | 1             | 0           | -1.308277               | 0.462206  | 1.202542  |
| 8             | 7             | 0           | -0.133938               | -1.845657 | 0.464825  |
| 9             | 7             | 0           | 0.886911                | -2.150387 | -0.399372 |
| 10            | 1             | 0           | 0.761162                | -2.771130 | -1.190183 |
| 11            | 7             | 0           | 2.128062                | -0.510436 | 0.605784  |
| 12            | 1             | 0           | 1.308279                | -0.462200 | 1.202543  |
| 13            | 6             | 0           | -2.039382               | 1.406057  | -0.382921 |
| 14            | 6             | 0           | -3.118120               | -0.563825 | 0.731560  |
| 15            | 1             | 0           | -3.541716               | -0.719185 | -0.262612 |
| 16            | 6             | 0           | -2.386528               | -1.849117 | 1.197555  |
| 17            | 1             | 0           | -1.939485               | -1.663826 | 2.178207  |
| 18            | 1             | 0           | -3.134166               | -2.636244 | 1.320254  |
| 19            | 6             | 0           | -1.313544               | -2.300701 | 0.235652  |
| 20            | 6             | 0           | 2.039382                | -1.406059 | -0.382917 |
| 21            | 6             | 0           | 3.118121                | 0.563828  | 0.731553  |
| 22            | 1             | 0           | 3.541717                | 0.719183  | -0.262619 |

|    |   |   |           |           |           |
|----|---|---|-----------|-----------|-----------|
| 23 | 6 | 0 | 2.386530  | 1.849123  | 1.197543  |
| 24 | 1 | 0 | 1.939488  | 1.663837  | 2.178197  |
| 25 | 1 | 0 | 3.134168  | 2.636251  | 1.320237  |
| 26 | 6 | 0 | 1.313544  | 2.300702  | 0.235639  |
| 27 | 6 | 0 | -1.684063 | -3.172857 | -0.934750 |
| 28 | 1 | 0 | -1.332921 | -2.747927 | -1.880575 |
| 29 | 1 | 0 | -2.764115 | -3.296778 | -1.001530 |
| 30 | 1 | 0 | -1.240317 | -4.169708 | -0.833146 |
| 31 | 6 | 0 | 1.684062  | 3.172851  | -0.934768 |
| 32 | 1 | 0 | 1.332918  | 2.747916  | -1.880591 |
| 33 | 1 | 0 | 2.764114  | 3.296772  | -1.001550 |
| 34 | 1 | 0 | 1.240317  | 4.169703  | -0.833170 |
| 35 | 6 | 0 | -4.242569 | -0.184798 | 1.699542  |
| 36 | 1 | 0 | -4.742297 | 0.725353  | 1.362572  |
| 37 | 1 | 0 | -4.984111 | -0.986156 | 1.750554  |
| 38 | 1 | 0 | -3.849116 | -0.013645 | 2.705407  |
| 39 | 6 | 0 | 4.242570  | 0.184806  | 1.699537  |
| 40 | 1 | 0 | 3.849118  | 0.013658  | 2.705403  |
| 41 | 1 | 0 | 4.742298  | -0.725347 | 1.362571  |
| 42 | 1 | 0 | 4.984113  | 0.986164  | 1.750544  |

**Data 53:** Cartesian coordinates and energies of the optimized geometry for the conformer **A** of macrocycle *trans*-**6** in MeCN solution.

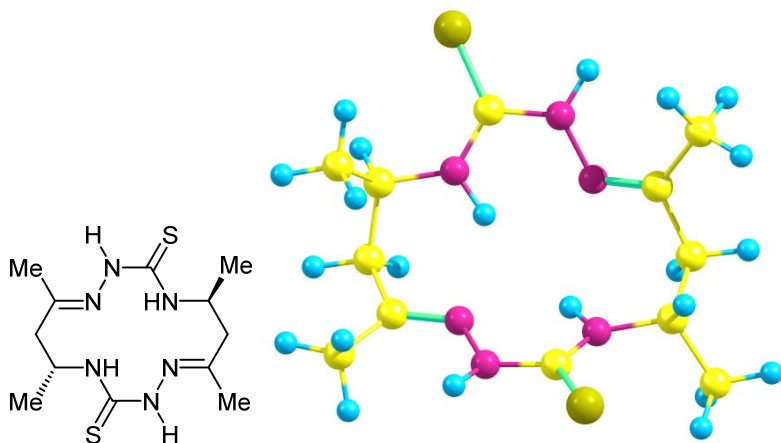

|                                              |                             |
|----------------------------------------------|-----------------------------|
| Electronic Energy =                          | -1595.69520431 a.u.         |
| Zero-point correction=                       | 0.350262 (Hartree/Particle) |
| Thermal correction to Energy=                | 0.372504                    |
| Thermal correction to Enthalpy=              | 0.373448                    |
| Thermal correction to Gibbs Free Energy=     | 0.299197                    |
| Sum of electronic and zero-point Energies=   | -1595.344943                |
| Sum of electronic and thermal Energies=      | -1595.322700                |
| Sum of electronic and thermal Enthalpies=    | -1595.321756                |
| Sum of electronic and thermal Free Energies= | -1595.396007                |

Standard orientation:

| Center Number | Atomic Number | Atomic Type | Coordinates (Angstroms) |           |           |
|---------------|---------------|-------------|-------------------------|-----------|-----------|
|               |               |             | X                       | Y         | Z         |
| 1             | 16            | 0           | -3.459083               | 1.651833  | 1.386058  |
| 2             | 16            | 0           | 3.947341                | -1.952774 | 0.389219  |
| 3             | 7             | 0           | -1.218625               | 2.192503  | 0.076944  |
| 4             | 1             | 0           | -1.243662               | 3.015166  | 0.668438  |
| 5             | 7             | 0           | -0.077973               | 1.819897  | -0.584257 |
| 6             | 7             | 0           | 2.044534                | -0.131217 | -0.247911 |
| 7             | 1             | 0           | 1.052899                | 0.049352  | -0.381216 |
| 8             | 7             | 0           | 1.314185                | -2.249328 | 0.179095  |
| 9             | 1             | 0           | 1.542487                | -3.213342 | 0.389511  |

|    |   |   |           |           |           |
|----|---|---|-----------|-----------|-----------|
| 10 | 7 | 0 | 0.100355  | -1.916425 | -0.386592 |
| 11 | 7 | 0 | -2.120626 | 0.142962  | -0.419330 |
| 12 | 1 | 0 | -1.280944 | 0.055894  | -0.981525 |
| 13 | 6 | 0 | -2.221086 | 1.273036  | 0.285262  |
| 14 | 6 | 0 | 0.925193  | 2.624928  | -0.624685 |
| 15 | 6 | 0 | 0.915228  | 4.006789  | -0.027482 |
| 16 | 1 | 0 | 0.083570  | 4.596625  | -0.427301 |
| 17 | 1 | 0 | 1.841539  | 4.535633  | -0.242833 |
| 18 | 1 | 0 | 0.796762  | 3.968883  | 1.061778  |
| 19 | 6 | 0 | 2.179835  | 2.072665  | -1.278724 |
| 20 | 1 | 0 | 2.870843  | 2.887843  | -1.495914 |
| 21 | 1 | 0 | 1.914737  | 1.603500  | -2.229504 |
| 22 | 6 | 0 | 2.929373  | 1.027312  | -0.409509 |
| 23 | 1 | 0 | 3.806828  | 0.699957  | -0.972427 |
| 24 | 6 | 0 | 3.387487  | 1.593137  | 0.939859  |
| 25 | 1 | 0 | 3.939092  | 0.836222  | 1.498073  |
| 26 | 1 | 0 | 2.536017  | 1.914101  | 1.545336  |
| 27 | 1 | 0 | 4.045607  | 2.451704  | 0.782255  |
| 28 | 6 | 0 | 2.373477  | -1.381452 | 0.077821  |
| 29 | 6 | 0 | -0.931223 | -2.633387 | -0.116819 |
| 30 | 6 | 0 | -0.950392 | -3.803693 | 0.826460  |
| 31 | 1 | 0 | -0.692332 | -4.729215 | 0.297949  |
| 32 | 1 | 0 | -1.949800 | -3.938265 | 1.242150  |
| 33 | 1 | 0 | -0.243621 | -3.675353 | 1.649053  |
| 34 | 6 | 0 | -2.204103 | -2.264396 | -0.853909 |
| 35 | 1 | 0 | -1.964211 | -2.073354 | -1.904256 |
| 36 | 1 | 0 | -2.884410 | -3.117630 | -0.834964 |
| 37 | 6 | 0 | -2.978811 | -1.044237 | -0.305163 |
| 38 | 1 | 0 | -3.200434 | -1.188222 | 0.755944  |
| 39 | 6 | 0 | -4.293735 | -0.868545 | -1.073491 |
| 40 | 1 | 0 | -4.933708 | -1.741986 | -0.924814 |
| 41 | 1 | 0 | -4.828120 | 0.013146  | -0.719269 |
| 42 | 1 | 0 | -4.101690 | -0.757279 | -2.144270 |

**Data 54:** Cartesian coordinates and energies of the optimized geometry for the conformer **B** of macrocycle *trans*-**6** in MeCN solution.

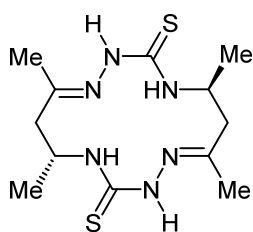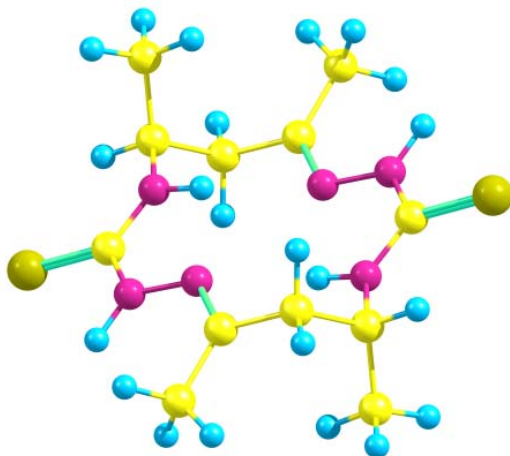

|                                              |                             |
|----------------------------------------------|-----------------------------|
| Electronic Energy =                          | -1595.69787303 a.u.         |
| Zero-point correction=                       | 0.350368 (Hartree/Particle) |
| Thermal correction to Energy=                | 0.372660                    |
| Thermal correction to Enthalpy=              | 0.373605                    |
| Thermal correction to Gibbs Free Energy=     | 0.298506                    |
| Sum of electronic and zero-point Energies=   | -1595.347505                |
| Sum of electronic and thermal Energies=      | -1595.325213                |
| Sum of electronic and thermal Enthalpies=    | -1595.324268                |
| Sum of electronic and thermal Free Energies= | -1595.399367                |

Standard orientation:

| Center Number | Atomic Number | Atomic Type | Coordinates (Angstroms) |           |           |
|---------------|---------------|-------------|-------------------------|-----------|-----------|
|               |               |             | X                       | Y         | Z         |
| 1             | 16            | 0           | -3.951678               | -1.744206 | 0.501525  |
| 2             | 7             | 0           | -0.174793               | -1.767978 | -0.578951 |
| 3             | 7             | 0           | -1.433120               | -2.160570 | -0.209810 |
| 4             | 1             | 0           | -1.651356               | -3.112467 | 0.058885  |
| 5             | 7             | 0           | -2.094069               | 0.022002  | -0.392499 |
| 6             | 1             | 0           | -1.119896               | 0.145604  | -0.652145 |
| 7             | 6             | 0           | -2.429166               | -1.229503 | -0.061671 |
| 8             | 6             | 0           | -2.864616               | 1.237689  | -0.126674 |
| 9             | 1             | 0           | -3.814591               | 0.911011  | 0.295871  |
| 10            | 6             | 0           | -2.149268               | 2.087526  | 0.961523  |
| 11            | 1             | 0           | -2.804265               | 2.921655  | 1.221225  |
| 12            | 1             | 0           | -2.040465               | 1.465336  | 1.852639  |
| 13            | 6             | 0           | -0.787851               | 2.621324  | 0.559567  |
| 14            | 6             | 0           | -0.623022               | 4.064686  | 0.160178  |
| 15            | 1             | 0           | -0.166181               | 4.155583  | -0.831322 |
| 16            | 1             | 0           | 0.024526                | 4.591469  | 0.870540  |
| 17            | 1             | 0           | -1.581264               | 4.580047  | 0.138178  |
| 18            | 16            | 0           | 3.951674                | 1.744201  | -0.501543 |
| 19            | 7             | 0           | 0.174796                | 1.767980  | 0.578954  |
| 20            | 7             | 0           | 1.433121                | 2.160570  | 0.209807  |
| 21            | 1             | 0           | 1.651355                | 3.112465  | -0.058900 |
| 22            | 7             | 0           | 2.094072                | -0.022000 | 0.392512  |
| 23            | 1             | 0           | 1.119902                | -0.145599 | 0.652165  |
| 24            | 6             | 0           | 2.429167                | 1.229502  | 0.061669  |
| 25            | 6             | 0           | 2.864617                | -1.237689 | 0.126687  |
| 26            | 1             | 0           | 3.814595                | -0.911013 | -0.295853 |
| 27            | 6             | 0           | 2.149272                | -2.087521 | -0.961516 |
| 28            | 1             | 0           | 2.804270                | -2.921650 | -1.221219 |
| 29            | 1             | 0           | 2.040472                | -1.465328 | -1.852630 |
| 30            | 6             | 0           | 0.787854                | -2.621321 | -0.559566 |
| 31            | 6             | 0           | 0.623024                | -4.064685 | -0.160184 |
| 32            | 1             | 0           | 0.166173                | -4.155587 | 0.831311  |
| 33            | 1             | 0           | -0.024515               | -4.591466 | -0.870554 |
| 34            | 1             | 0           | 1.581267                | -4.580043 | -0.138176 |
| 35            | 6             | 0           | 3.127962                | -2.000317 | 1.427820  |
| 36            | 1             | 0           | 2.196588                | -2.293289 | 1.920496  |
| 37            | 1             | 0           | 3.707184                | -2.904766 | 1.226216  |
| 38            | 1             | 0           | 3.695490                | -1.376788 | 2.121746  |
| 39            | 6             | 0           | -3.127970               | 2.000314  | -1.427808 |
| 40            | 1             | 0           | -2.196600               | 2.293288  | -1.920489 |
| 41            | 1             | 0           | -3.695499               | 1.376781  | -2.121730 |
| 42            | 1             | 0           | -3.707195               | 2.904761  | -1.226203 |

**Table 17** Relative electronic ( $\Delta E$ , kcal/mol) and Gibbs free energies ( $\Delta G$ , kcal/mol) of various conformers of *cis*- and *trans*-**6** in MeCN solution

| Conformer | <i>cis</i> - <b>6</b> |            | <i>trans</i> - <b>6</b> |            |
|-----------|-----------------------|------------|-------------------------|------------|
|           | $\Delta E$            | $\Delta G$ | $\Delta E$              | $\Delta G$ |
| <b>A</b>  | 1.42                  | 0.00       | 3.05                    | 3.50       |
| <b>B</b>  | 0.00                  | 0.33       | 1.38                    | 1.39       |



## EtOH solution

**Data 55:** Cartesian coordinates and energies of the optimized geometry for the conformer **A** of macrocycle *cis*-**6** in EtOH solution.

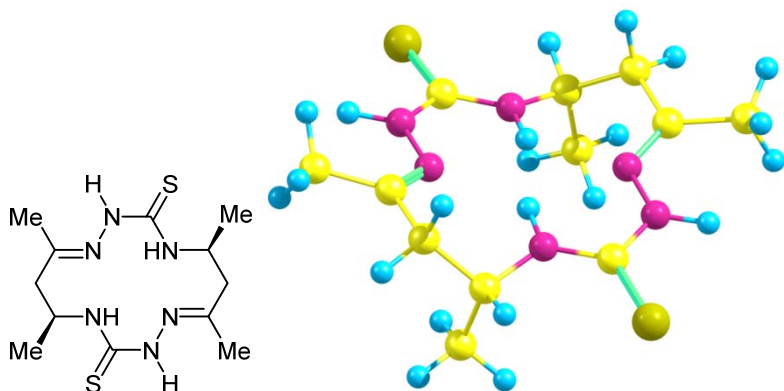

|                                              |                             |
|----------------------------------------------|-----------------------------|
| Electronic Energy =                          | -1595.69729706 a.u.         |
| Zero-point correction=                       | 0.349570 (Hartree/Particle) |
| Thermal correction to Energy=                | 0.372313                    |
| Thermal correction to Enthalpy=              | 0.373258                    |
| Thermal correction to Gibbs Free Energy=     | 0.296116                    |
| Sum of electronic and zero-point Energies=   | -1595.347727                |
| Sum of electronic and thermal Energies=      | -1595.324984                |
| Sum of electronic and thermal Enthalpies=    | -1595.324039                |
| Sum of electronic and thermal Free Energies= | -1595.401181                |

Standard orientation:

| Center Number | Atomic Number | Atomic Type | Coordinates (Angstroms) |           |           |
|---------------|---------------|-------------|-------------------------|-----------|-----------|
|               |               |             | X                       | Y         | Z         |
| 1             | 16            | 0           | -4.345263               | 0.666892  | 0.126278  |
| 2             | 16            | 0           | 4.345263                | -0.666893 | 0.126269  |
| 3             | 7             | 0           | -1.962889               | 1.779628  | -0.226956 |
| 4             | 1             | 0           | -2.510583               | 2.630669  | -0.250739 |
| 5             | 7             | 0           | -0.591765               | 1.792980  | -0.266002 |
| 6             | 7             | 0           | 1.903539                | 0.496386  | -0.014719 |
| 7             | 1             | 0           | 0.901060                | 0.378637  | -0.097249 |
| 8             | 7             | 0           | 1.962889                | -1.779628 | -0.226962 |
| 9             | 1             | 0           | 2.510582                | -2.630669 | -0.250747 |
| 10            | 7             | 0           | 0.591765                | -1.792979 | -0.266005 |
| 11            | 7             | 0           | -1.903539               | -0.496386 | -0.014715 |
| 12            | 1             | 0           | -0.901060               | -0.378637 | -0.097248 |
| 13            | 6             | 0           | -2.650264               | 0.606998  | -0.035317 |
| 14            | 6             | 0           | 0.028199                | 2.884038  | -0.542963 |
| 15            | 6             | 0           | -0.653927               | 4.185292  | -0.873745 |
| 16            | 1             | 0           | -1.514309               | 4.037888  | -1.532094 |
| 17            | 1             | 0           | 0.038011                | 4.867059  | -1.367478 |
| 18            | 1             | 0           | -1.007660               | 4.678577  | 0.039111  |
| 19            | 6             | 0           | 1.547503                | 2.864610  | -0.595142 |
| 20            | 1             | 0           | 1.902119                | 3.866117  | -0.336920 |
| 21            | 1             | 0           | 1.834139                | 2.712285  | -1.643977 |
| 22            | 6             | 0           | 2.319770                | 1.865933  | 0.291690  |
| 23            | 1             | 0           | 3.373891                | 1.943933  | 0.021511  |
| 24            | 6             | 0           | 2.172903                | 2.165444  | 1.790154  |
| 25            | 1             | 0           | 2.768633                | 1.461677  | 2.374890  |
| 26            | 1             | 0           | 1.131429                | 2.087132  | 2.110168  |
| 27            | 1             | 0           | 2.527153                | 3.176318  | 2.008126  |
| 28            | 6             | 0           | 2.650264                | -0.606998 | -0.035323 |
| 29            | 6             | 0           | -0.028201               | -2.884037 | -0.542966 |
| 30            | 6             | 0           | 0.653925                | -4.185291 | -0.873751 |
| 31            | 1             | 0           | 1.514306                | -4.037886 | -1.532102 |

|    |   |   |           |           |           |
|----|---|---|-----------|-----------|-----------|
| 32 | 1 | 0 | -0.038014 | -4.867057 | -1.367484 |
| 33 | 1 | 0 | 1.007660  | -4.678577 | 0.039103  |
| 34 | 6 | 0 | -1.547504 | -2.864609 | -0.595142 |
| 35 | 1 | 0 | -1.834143 | -2.712284 | -1.643976 |
| 36 | 1 | 0 | -1.902120 | -3.866117 | -0.336919 |
| 37 | 6 | 0 | -2.319769 | -1.865933 | 0.291693  |
| 38 | 1 | 0 | -3.373891 | -1.943933 | 0.021516  |
| 39 | 6 | 0 | -2.172899 | -2.165445 | 1.790157  |
| 40 | 1 | 0 | -2.768629 | -1.461679 | 2.374894  |
| 41 | 1 | 0 | -1.131425 | -2.087134 | 2.110168  |
| 42 | 1 | 0 | -2.527149 | -3.176320 | 2.008128  |

**Data 56:** Cartesian coordinates and energies of the optimized geometry for the conformer **B** of macrocycle *cis*-6 in EtOH solution.

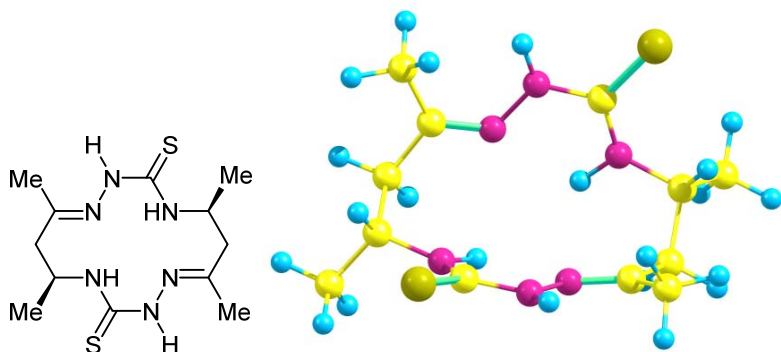

|                                              |                             |
|----------------------------------------------|-----------------------------|
| Electronic Energy =                          | -1595.69956812 a.u.         |
| Zero-point correction=                       | 0.350316 (Hartree/Particle) |
| Thermal correction to Energy=                | 0.372563                    |
| Thermal correction to Enthalpy=              | 0.373508                    |
| Thermal correction to Gibbs Free Energy=     | 0.298971                    |
| Sum of electronic and zero-point Energies=   | -1595.349252                |
| Sum of electronic and thermal Energies=      | -1595.327005                |
| Sum of electronic and thermal Enthalpies=    | -1595.326060                |
| Sum of electronic and thermal Free Energies= | -1595.400598                |

Standard orientation:

| Center Number | Atomic Number | Atomic Type | Coordinates (Angstroms) |           |           |
|---------------|---------------|-------------|-------------------------|-----------|-----------|
|               |               |             | X                       | Y         | Z         |
| 1             | 16            | 0           | -3.213198               | 1.677731  | -1.583426 |
| 2             | 16            | 0           | 3.213196                | -1.677738 | -1.583422 |
| 3             | 7             | 0           | 0.134420                | 1.845518  | 0.465132  |
| 4             | 7             | 0           | -0.886345               | 2.150498  | -0.398879 |
| 5             | 1             | 0           | -0.760067               | 2.769974  | -1.190591 |
| 6             | 7             | 0           | -2.128275               | 0.511043  | 0.606359  |
| 7             | 1             | 0           | -1.308354               | 0.462337  | 1.202818  |
| 8             | 7             | 0           | -0.134419               | -1.845516 | 0.465141  |
| 9             | 7             | 0           | 0.886345                | -2.150500 | -0.398869 |
| 10            | 1             | 0           | 0.760066                | -2.769980 | -1.190578 |
| 11            | 7             | 0           | 2.128276                | -0.511040 | 0.606359  |
| 12            | 1             | 0           | 1.308355                | -0.462331 | 1.202819  |
| 13            | 6             | 0           | -2.039221               | 1.406325  | -0.382861 |
| 14            | 6             | 0           | -3.118466               | -0.563036 | 0.731582  |
| 15            | 1             | 0           | -3.541685               | -0.718099 | -0.262819 |
| 16            | 6             | 0           | -2.387198               | -1.848504 | 1.197623  |
| 17            | 1             | 0           | -1.940189               | -1.663364 | 2.178346  |
| 18            | 1             | 0           | -3.134982               | -2.635524 | 1.320350  |
| 19            | 6             | 0           | -1.314122               | -2.300281 | 0.235906  |
| 20            | 6             | 0           | 2.039221                | -1.406327 | -0.382857 |
| 21            | 6             | 0           | 3.118467                | 0.563040  | 0.731576  |
| 22            | 1             | 0           | 3.541684                | 0.718098  | -0.262826 |
| 23            | 6             | 0           | 2.387199                | 1.848510  | 1.197611  |
| 24            | 1             | 0           | 1.940192                | 1.663376  | 2.178336  |
| 25            | 1             | 0           | 3.134983                | 2.635530  | 1.320333  |

|    |   |   |           |           |           |
|----|---|---|-----------|-----------|-----------|
| 26 | 6 | 0 | 1.314122  | 2.300282  | 0.235893  |
| 27 | 6 | 0 | -1.684551 | -3.172130 | -0.934820 |
| 28 | 1 | 0 | -1.334885 | -2.745894 | -1.880633 |
| 29 | 1 | 0 | -2.764499 | -3.297389 | -1.000888 |
| 30 | 1 | 0 | -1.239385 | -4.168498 | -0.834549 |
| 31 | 6 | 0 | 1.684550  | 3.172125  | -0.934838 |
| 32 | 1 | 0 | 1.334882  | 2.745884  | -1.880649 |
| 33 | 1 | 0 | 2.764498  | 3.297383  | -1.000908 |
| 34 | 1 | 0 | 1.239385  | 4.168494  | -0.834572 |
| 35 | 6 | 0 | -4.243431 | -0.183965 | 1.698959  |
| 36 | 1 | 0 | -4.742724 | 0.726292  | 1.361685  |
| 37 | 1 | 0 | -4.985232 | -0.985141 | 1.749451  |
| 38 | 1 | 0 | -3.850651 | -0.012952 | 2.705132  |
| 39 | 6 | 0 | 4.243433  | 0.183973  | 1.698954  |
| 40 | 1 | 0 | 3.850654  | 0.012965  | 2.705127  |
| 41 | 1 | 0 | 4.742725  | -0.726285 | 1.361684  |
| 42 | 1 | 0 | 4.985234  | 0.985149  | 1.749441  |

**Data 57:** Cartesian coordinates and energies of the optimized geometry for the conformer **A** of macrocycle *trans*-6 in EtOH solution.

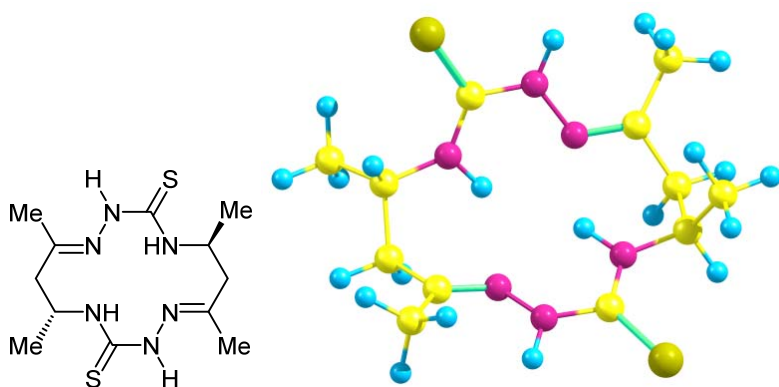

|                                              |                             |
|----------------------------------------------|-----------------------------|
| Electronic Energy =                          | -1595.69470823 a.u.         |
| Zero-point correction=                       | 0.350274 (Hartree/Particle) |
| Thermal correction to Energy=                | 0.372515                    |
| Thermal correction to Enthalpy=              | 0.373459                    |
| Thermal correction to Gibbs Free Energy=     | 0.299203                    |
| Sum of electronic and zero-point Energies=   | -1595.344434                |
| Sum of electronic and thermal Energies=      | -1595.322193                |
| Sum of electronic and thermal Enthalpies=    | -1595.321249                |
| Sum of electronic and thermal Free Energies= | -1595.395505                |

Standard orientation:

| Center Number | Atomic Number | Atomic Type | Coordinates (Angstroms) |           |           |
|---------------|---------------|-------------|-------------------------|-----------|-----------|
|               |               |             | X                       | Y         | Z         |
| 1             | 16            | 0           | -3.459769               | 1.651915  | 1.384565  |
| 2             | 16            | 0           | 3.947502                | -1.952178 | 0.388947  |
| 3             | 7             | 0           | -1.219244               | 2.192640  | 0.075928  |
| 4             | 1             | 0           | -1.244895               | 3.015387  | 0.667272  |
| 5             | 7             | 0           | -0.078291               | 1.820166  | -0.584547 |
| 6             | 7             | 0           | 2.044635                | -0.130850 | -0.247932 |
| 7             | 1             | 0           | 1.053020                | 0.049529  | -0.381228 |
| 8             | 7             | 0           | 1.314452                | -2.248960 | 0.179571  |
| 9             | 1             | 0           | 1.543061                | -3.212795 | 0.390445  |
| 10            | 7             | 0           | 0.100651                | -1.916444 | -0.385938 |
| 11            | 7             | 0           | -2.120602               | 0.142530  | -0.419684 |
| 12            | 1             | 0           | -1.280278               | 0.055016  | -0.980805 |
| 13            | 6             | 0           | -2.221789               | 1.272950  | 0.284554  |
| 14            | 6             | 0           | 0.924972                | 2.625094  | -0.624427 |
| 15            | 6             | 0           | 0.914677                | 4.006824  | -0.026796 |
| 16            | 1             | 0           | 0.083042                | 4.596736  | -0.426588 |
| 17            | 1             | 0           | 1.840954                | 4.535915  | -0.241768 |

|    |   |   |           |           |           |
|----|---|---|-----------|-----------|-----------|
| 18 | 1 | 0 | 0.796017  | 3.968647  | 1.062446  |
| 19 | 6 | 0 | 2.179884  | 2.073141  | -1.278233 |
| 20 | 1 | 0 | 2.870791  | 2.888524  | -1.495114 |
| 21 | 1 | 0 | 1.915067  | 1.604186  | -2.229205 |
| 22 | 6 | 0 | 2.929434  | 1.027611  | -0.409221 |
| 23 | 1 | 0 | 3.806967  | 0.700302  | -0.972072 |
| 24 | 6 | 0 | 3.387609  | 1.593057  | 0.940303  |
| 25 | 1 | 0 | 3.939208  | 0.835895  | 1.498178  |
| 26 | 1 | 0 | 2.536150  | 1.913803  | 1.545935  |
| 27 | 1 | 0 | 4.045836  | 2.451646  | 0.783069  |
| 28 | 6 | 0 | 2.374050  | -1.381092 | 0.077885  |
| 29 | 6 | 0 | -0.930749 | -2.633777 | -0.116542 |
| 30 | 6 | 0 | -0.949445 | -3.804386 | 0.826473  |
| 31 | 1 | 0 | -0.691158 | -4.729858 | 0.297956  |
| 32 | 1 | 0 | -1.948719 | -3.939343 | 1.242392  |
| 33 | 1 | 0 | -0.242691 | -3.675887 | 1.649072  |
| 34 | 6 | 0 | -2.203807 | -2.264911 | -0.853432 |
| 35 | 1 | 0 | -1.964088 | -2.074003 | -1.903862 |
| 36 | 1 | 0 | -2.884084 | -3.118204 | -0.834395 |
| 37 | 6 | 0 | -2.978535 | -1.044695 | -0.304802 |
| 38 | 1 | 0 | -3.199851 | -1.188317 | 0.756450  |
| 39 | 6 | 0 | -4.293828 | -0.869415 | -1.072592 |
| 40 | 1 | 0 | -4.933764 | -1.742794 | -0.923266 |
| 41 | 1 | 0 | -4.828029 | 0.012369  | -0.718369 |
| 42 | 1 | 0 | -4.102326 | -0.758530 | -2.143523 |

**Data 58:** Cartesian coordinates and energies of the optimized geometry for the conformer **B** of macrocycle *trans*-6 in EtOH solution.

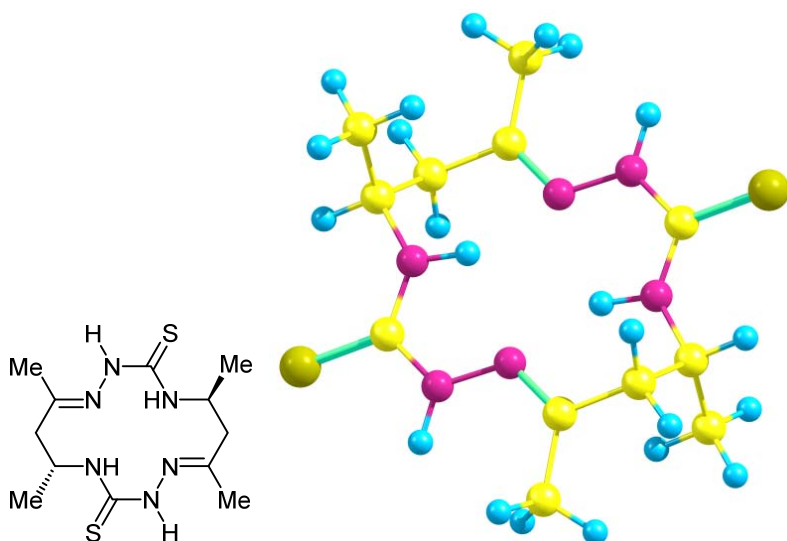

|                                              |                             |
|----------------------------------------------|-----------------------------|
| Electronic Energy =                          | -1595.69738185 a.u.         |
| Zero-point correction=                       | 0.350387 (Hartree/Particle) |
| Thermal correction to Energy=                | 0.372672                    |
| Thermal correction to Enthalpy=              | 0.373616                    |
| Thermal correction to Gibbs Free Energy=     | 0.298559                    |
| Sum of electronic and zero-point Energies=   | -1595.346995                |
| Sum of electronic and thermal Energies=      | -1595.324710                |
| Sum of electronic and thermal Enthalpies=    | -1595.323765                |
| Sum of electronic and thermal Free Energies= | -1595.398823                |

Standard orientation:

| Center Number | Atomic Number | Atomic Type | Coordinates (Angstroms) |           |           |
|---------------|---------------|-------------|-------------------------|-----------|-----------|
|               |               |             | X                       | Y         | Z         |
| 1             | 16            | 0           | -3.950659               | -1.745024 | 0.501454  |
| 2             | 7             | 0           | -0.173892               | -1.767981 | -0.578301 |

|    |    |   |           |           |           |
|----|----|---|-----------|-----------|-----------|
| 3  | 7  | 0 | -1.432173 | -2.160892 | -0.209922 |
| 4  | 1  | 0 | -1.650409 | -3.112747 | 0.058903  |
| 5  | 7  | 0 | -2.093872 | 0.021430  | -0.393445 |
| 6  | 1  | 0 | -1.119641 | 0.145232  | -0.652651 |
| 7  | 6  | 0 | -2.428866 | -1.230092 | -0.061985 |
| 8  | 6  | 0 | -2.864860 | 1.236761  | -0.127809 |
| 9  | 1  | 0 | -3.814953 | 0.909576  | 0.294113  |
| 10 | 6  | 0 | -2.150394 | 2.086803  | 0.960829  |
| 11 | 1  | 0 | -2.805848 | 2.920674  | 1.220326  |
| 12 | 1  | 0 | -2.041923 | 1.464578  | 1.851967  |
| 13 | 6  | 0 | -0.788919 | 2.621144  | 0.559710  |
| 14 | 6  | 0 | -0.623960 | 4.065012  | 0.161994  |
| 15 | 1  | 0 | -0.166581 | 4.157143  | -0.829167 |
| 16 | 1  | 0 | 0.023207  | 4.591075  | 0.873261  |
| 17 | 1  | 0 | -1.582194 | 4.580420  | 0.140006  |
| 18 | 16 | 0 | 3.950656  | 1.745020  | -0.501465 |
| 19 | 7  | 0 | 0.173894  | 1.767983  | 0.578303  |
| 20 | 7  | 0 | 1.432174  | 2.160892  | 0.209919  |
| 21 | 1  | 0 | 1.650409  | 3.112746  | -0.058913 |
| 22 | 7  | 0 | 2.093875  | -0.021429 | 0.393453  |
| 23 | 1  | 0 | 1.119645  | -0.145229 | 0.652663  |
| 24 | 6  | 0 | 2.428866  | 1.230091  | 0.061983  |
| 25 | 6  | 0 | 2.864860  | -1.236761 | 0.127817  |
| 26 | 1  | 0 | 3.814956  | -0.909577 | -0.294102 |
| 27 | 6  | 0 | 2.150396  | -2.086800 | -0.960825 |
| 28 | 1  | 0 | 2.805850  | -2.920670 | -1.220322 |
| 29 | 1  | 0 | 2.041927  | -1.464573 | -1.851961 |
| 30 | 6  | 0 | 0.788921  | -2.621142 | -0.559709 |
| 31 | 6  | 0 | 0.623962  | -4.065011 | -0.161998 |
| 32 | 1  | 0 | 0.166576  | -4.157145 | 0.829160  |
| 33 | 1  | 0 | -0.023199 | -4.591074 | -0.873270 |
| 34 | 1  | 0 | 1.582196  | -4.580418 | -0.140004 |
| 35 | 6  | 0 | 3.127735  | -1.999524 | 1.428975  |
| 36 | 1  | 0 | 2.196163  | -2.293075 | 1.920976  |
| 37 | 1  | 0 | 3.707582  | -2.903667 | 1.227702  |
| 38 | 1  | 0 | 3.694449  | -1.375822 | 2.123384  |
| 39 | 6  | 0 | -3.127741 | 1.999522  | -1.428967 |
| 40 | 1  | 0 | -2.196171 | 2.293075  | -1.920971 |
| 41 | 1  | 0 | -3.694455 | 1.375818  | -2.123374 |
| 42 | 1  | 0 | -3.707589 | 2.903664  | -1.227693 |

**Data 59:** Cartesian coordinates and energies of the optimized geometry for the conformer **C** of macrocycle *trans*-6 in EtOH solution.

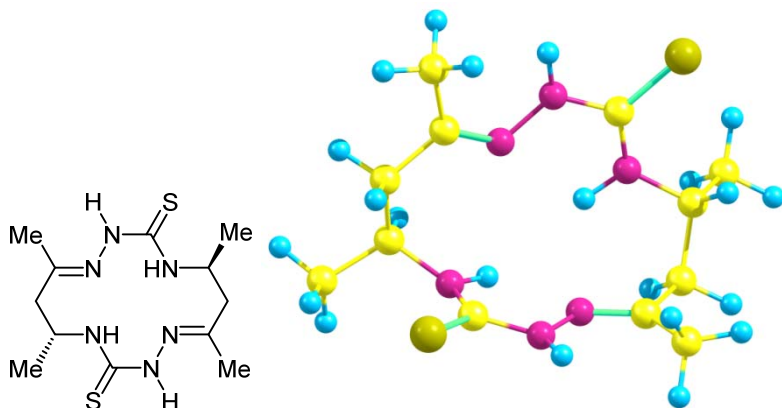

|                                            |                             |
|--------------------------------------------|-----------------------------|
| Electronic Energy =                        | -1595.69107158 a.u.         |
| Zero-point correction=                     | 0.350089 (Hartree/Particle) |
| Thermal correction to Energy=              | 0.372426                    |
| Thermal correction to Enthalpy=            | 0.373370                    |
| Thermal correction to Gibbs Free Energy=   | 0.299001                    |
| Sum of electronic and zero-point Energies= | -1595.340983                |
| Sum of electronic and thermal Energies=    | -1595.318645                |
| Sum of electronic and thermal Enthalpies=  | -1595.317701                |

Sum of electronic and thermal Free Energies= -1595.392070

Standard orientation:

| Center Number | Atomic Number | Atomic Type | Coordinates (Angstroms) |           |           |
|---------------|---------------|-------------|-------------------------|-----------|-----------|
|               |               |             | X                       | Y         | Z         |
| 1             | 6             | 0           | 2.087016                | -1.349100 | -0.247336 |
| 2             | 16            | 0           | 3.359812                | -1.340562 | -1.372503 |
| 3             | 7             | 0           | 0.991998                | -2.147254 | -0.501476 |
| 4             | 7             | 0           | -0.119633               | -2.013321 | 0.284751  |
| 5             | 6             | 0           | -1.258270               | -2.464550 | -0.101900 |
| 6             | 7             | 0           | 2.009831                | -0.662472 | 0.897901  |
| 7             | 6             | 0           | 2.755183                | 0.530061  | 1.341248  |
| 8             | 6             | 0           | -2.079136               | 1.426962  | -0.142073 |
| 9             | 16            | 0           | -3.453870               | 2.044692  | -0.935971 |
| 10            | 7             | 0           | -0.920112               | 2.155536  | -0.183080 |
| 11            | 7             | 0           | 0.273894                | 1.634707  | 0.266345  |
| 12            | 6             | 0           | 1.354681                | 2.235991  | -0.083910 |
| 13            | 6             | 0           | 2.699183                | 1.699444  | 0.347190  |
| 14            | 7             | 0           | -2.028319               | 0.271198  | 0.529299  |
| 15            | 6             | 0           | -3.069694               | -0.767304 | 0.543975  |
| 16            | 1             | 0           | 0.969886                | -2.613163 | -1.401464 |
| 17            | 1             | 0           | 1.124401                | -0.800243 | 1.370344  |
| 18            | 1             | 0           | -0.952516               | 2.993067  | -0.751691 |
| 19            | 1             | 0           | -1.107388               | 0.010164  | 0.865807  |
| 20            | 6             | 0           | -2.404501               | -2.140018 | 0.827267  |
| 21            | 1             | 0           | 2.216610                | 0.837461  | 2.240595  |
| 22            | 1             | 0           | 3.251374                | 1.436742  | -0.562842 |
| 23            | 1             | 0           | 3.256611                | 2.531812  | 0.793071  |
| 24            | 1             | 0           | -3.526829               | -0.778737 | -0.449053 |
| 25            | 1             | 0           | -2.033528               | -2.139502 | 1.855620  |
| 26            | 1             | 0           | -3.181037               | -2.904097 | 0.756408  |
| 27            | 6             | 0           | 1.389833                | 3.468954  | -0.954775 |
| 28            | 1             | 0           | 0.889309                | 3.293053  | -1.912776 |
| 29            | 1             | 0           | 0.891220                | 4.312972  | -0.465831 |
| 30            | 1             | 0           | 2.416430                | 3.765866  | -1.164277 |
| 31            | 6             | 0           | -1.499070               | -3.186897 | -1.399017 |
| 32            | 1             | 0           | -0.982592               | -4.153113 | -1.408000 |
| 33            | 1             | 0           | -2.561069               | -3.373484 | -1.551631 |
| 34            | 1             | 0           | -1.129865               | -2.607572 | -2.252104 |
| 35            | 6             | 0           | -4.152466               | -0.478709 | 1.588104  |
| 36            | 1             | 0           | -4.621921               | 0.486060  | 1.393573  |
| 37            | 1             | 0           | -4.924757               | -1.251609 | 1.550718  |
| 38            | 1             | 0           | -3.723917               | -0.465619 | 2.594021  |
| 39            | 6             | 0           | 4.197158                | 0.207438  | 1.748731  |
| 40            | 1             | 0           | 4.210188                | -0.608738 | 2.474361  |
| 41            | 1             | 0           | 4.796979                | -0.084679 | 0.886413  |
| 42            | 1             | 0           | 4.654229                | 1.084898  | 2.213121  |

**Table 18** Relative electronic ( $\Delta E$ , kcal/mol) and Gibbs free energies ( $\Delta G$ , kcal/mol) of various conformers of *cis*- and *trans*-**6** in EtOH solution

| Conformer | <i>cis</i> - <b>6</b> |            | <i>trans</i> - <b>6</b> |            |
|-----------|-----------------------|------------|-------------------------|------------|
|           | $\Delta E$            | $\Delta G$ | $\Delta E$              | $\Delta G$ |
| <b>A</b>  | 1.43                  | 0.00       | 3.05                    | 3.56       |
| <b>B</b>  | 0.00                  | 0.37       | 1.37                    | 1.50       |
| <b>C</b>  |                       |            | 5.33                    | 5.72       |

## 21-Membered cyclic tris-thiosemicarbazone **7**

(1*Z*,5*R*\*,7*E*,12*S*\*,14*E*,19*S*\*)-diastereomer

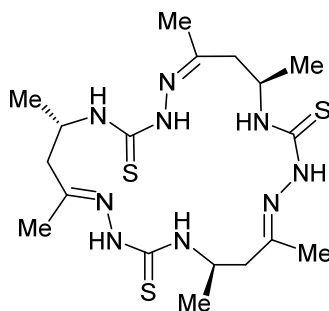

DMSO solution

**Data 60:** Cartesian coordinates and energies of the optimized geometry for the most stable conformer of macrocycle **7** in DMSO solution.

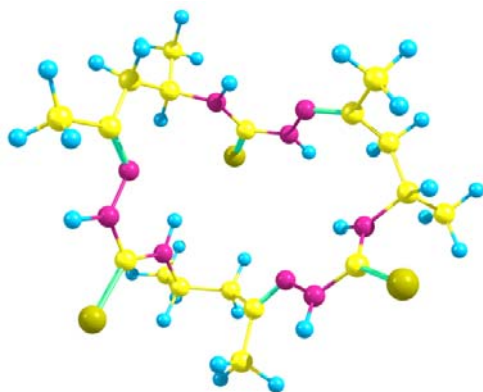

|                                              |                             |
|----------------------------------------------|-----------------------------|
| Electronic Energy =                          | -2393.55546623 a.u.         |
| Zero-point correction=                       | 0.525444 (Hartree/Particle) |
| Thermal correction to Energy=                | 0.560070                    |
| Thermal correction to Enthalpy=              | 0.561014                    |
| Thermal correction to Gibbs Free Energy=     | 0.457342                    |
| Sum of electronic and zero-point Energies=   | -2393.030023                |
| Sum of electronic and thermal Energies=      | -2392.995396                |
| Sum of electronic and thermal Enthalpies=    | -2392.994452                |
| Sum of electronic and thermal Free Energies= | -2393.098124                |

Standard orientation:

| Center<br>Number | Atomic<br>Number | Atomic<br>Type | Coordinates (Angstroms) |           |           |
|------------------|------------------|----------------|-------------------------|-----------|-----------|
|                  |                  |                | X                       | Y         | Z         |
| 1                | 16               | 0              | 3.411846                | 3.236078  | 1.298787  |
| 2                | 16               | 0              | 0.894297                | -1.701801 | -2.666908 |
| 3                | 16               | 0              | -4.136468               | 1.845960  | 2.080085  |
| 4                | 7                | 0              | -1.650520               | -2.533893 | 0.210967  |
| 5                | 7                | 0              | -1.090197               | -2.107529 | -0.963101 |
| 6                | 1                | 0              | -1.630343               | -1.715489 | -1.723762 |
| 7                | 7                | 0              | 0.945357                | -2.840694 | -0.209573 |
| 8                | 1                | 0              | 0.395449                | -3.142045 | 0.589110  |
| 9                | 7                | 0              | 2.906373                | -0.644232 | 0.923410  |
| 10               | 7                | 0              | 3.140383                | 0.614693  | 1.417015  |
| 11               | 1                | 0              | 3.601856                | 0.764569  | 2.305929  |
| 12               | 7                | 0              | 2.338047                | 1.535797  | -0.528573 |
| 13               | 1                | 0              | 2.142835                | 0.568218  | -0.775365 |
| 14               | 7                | 0              | -1.233628               | 2.095607  | -0.562215 |



|    |   |   |           |           |           |
|----|---|---|-----------|-----------|-----------|
| 15 | 7 | 0 | -2.110070 | 2.375733  | 0.458187  |
| 16 | 1 | 0 | -1.948173 | 3.125000  | 1.120082  |
| 17 | 7 | 0 | -3.321890 | 0.533344  | -0.149770 |
| 18 | 1 | 0 | -2.684078 | 0.552384  | -0.939427 |
| 19 | 6 | 0 | 0.250148  | -2.262393 | -1.190663 |
| 20 | 6 | 0 | 2.370629  | -3.185161 | -0.247039 |
| 21 | 1 | 0 | 2.843918  | -2.472589 | -0.921245 |
| 22 | 6 | 0 | 2.970929  | -3.039279 | 1.153787  |
| 23 | 1 | 0 | 2.378194  | -3.613958 | 1.877688  |
| 24 | 1 | 0 | 3.956879  | -3.520295 | 1.158055  |
| 25 | 6 | 0 | 3.157725  | -1.641781 | 1.690981  |
| 26 | 6 | 0 | 2.925633  | 1.729541  | 0.658290  |
| 27 | 6 | 0 | 2.106683  | 2.563374  | -1.549591 |
| 28 | 1 | 0 | 2.383424  | 3.509289  | -1.085144 |
| 29 | 6 | 0 | 0.618054  | 2.605882  | -1.961381 |
| 30 | 1 | 0 | 0.526163  | 3.359024  | -2.752810 |
| 31 | 1 | 0 | 0.323171  | 1.642587  | -2.384476 |
| 32 | 6 | 0 | -0.331666 | 2.965990  | -0.848794 |
| 33 | 6 | 0 | -3.157613 | 1.539236  | 0.721098  |
| 34 | 6 | 0 | -4.436091 | -0.417549 | -0.169981 |
| 35 | 1 | 0 | -4.835558 | -0.438001 | 0.843581  |
| 36 | 6 | 0 | -3.924219 | -1.826492 | -0.548737 |
| 37 | 1 | 0 | -4.792636 | -2.491407 | -0.556762 |
| 38 | 1 | 0 | -3.556240 | -1.811980 | -1.578393 |
| 39 | 6 | 0 | -2.912722 | -2.405426 | 0.415932  |
| 40 | 6 | 0 | 2.569919  | -4.606306 | -0.790166 |
| 41 | 1 | 0 | 2.114577  | -4.701816 | -1.777694 |
| 42 | 1 | 0 | 2.116991  | -5.348284 | -0.126008 |
| 43 | 1 | 0 | 3.635763  | -4.831175 | -0.880577 |
| 44 | 6 | 0 | 3.675002  | -1.519850 | 3.102229  |
| 45 | 1 | 0 | 2.997363  | -0.922521 | 3.721167  |
| 46 | 1 | 0 | 4.658985  | -1.038340 | 3.123905  |
| 47 | 1 | 0 | 3.777122  | -2.500753 | 3.564493  |
| 48 | 6 | 0 | 3.009466  | 2.321089  | -2.764347 |
| 49 | 1 | 0 | 4.059322  | 2.316777  | -2.463617 |
| 50 | 1 | 0 | 2.866503  | 3.111833  | -3.504795 |
| 51 | 1 | 0 | 2.781325  | 1.362835  | -3.239553 |
| 52 | 6 | 0 | -0.195519 | 4.301087  | -0.165566 |
| 53 | 1 | 0 | -1.164217 | 4.806452  | -0.101375 |
| 54 | 1 | 0 | 0.488773  | 4.949792  | -0.710838 |
| 55 | 1 | 0 | 0.197161  | 4.190765  | 0.850868  |
| 56 | 6 | 0 | -5.538777 | 0.044233  | -1.129609 |
| 57 | 1 | 0 | -5.900010 | 1.033387  | -0.841633 |
| 58 | 1 | 0 | -6.381272 | -0.651164 | -1.102247 |
| 59 | 1 | 0 | -5.168211 | 0.095513  | -2.157461 |
| 60 | 6 | 0 | -3.431579 | -2.899499 | 1.737585  |
| 61 | 1 | 0 | -2.617139 | -3.283747 | 2.350719  |
| 62 | 1 | 0 | -4.169580 | -3.693475 | 1.582919  |
| 63 | 1 | 0 | -3.936113 | -2.097136 | 2.284643  |

---

### MeCN solution

**Data 61:** Cartesian coordinates and energies of the optimized geometry for the most stable conformer of macrocycle **7** in MeCN solution.

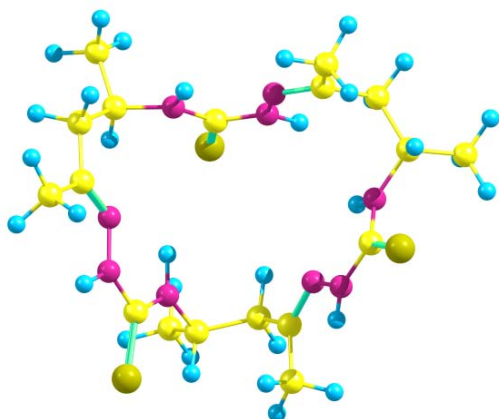



Electronic Energy = -2393.55507849 a.u.  
 Zero-point correction= 0.525467 (Hartree/Particle)  
 Thermal correction to Energy= 0.560087  
 Thermal correction to Enthalpy= 0.561032  
 Thermal correction to Gibbs Free Energy= 0.457384  
 Sum of electronic and zero-point Energies= -2393.029612  
 Sum of electronic and thermal Energies= -2392.994991  
 Sum of electronic and thermal Enthalpies= -2392.994047  
 Sum of electronic and thermal Free Energies= -2393.097695

Standard orientation:

| Center<br>Number | Atomic<br>Number | Atomic<br>Type | Coordinates (Angstroms) |           |           |
|------------------|------------------|----------------|-------------------------|-----------|-----------|
|                  |                  |                | X                       | Y         | Z         |
| 1                | 16               | 0              | 3.401808                | -3.241757 | -1.300453 |
| 2                | 16               | 0              | 0.898000                | 1.702240  | 2.667150  |
| 3                | 16               | 0              | -4.140543               | -1.842452 | -2.077626 |
| 4                | 7                | 0              | -1.645156               | 2.537636  | -0.211105 |
| 5                | 7                | 0              | -1.085726               | 2.111582  | 0.963398  |
| 6                | 1                | 0              | -1.626290               | 1.719298  | 1.723610  |
| 7                | 7                | 0              | 0.951300                | 2.840184  | 0.209500  |
| 8                | 1                | 0              | 0.402051                | 3.141668  | -0.589558 |
| 9                | 7                | 0              | 2.906409                | 0.639584  | -0.924863 |
| 10               | 7                | 0              | 3.136507                | -0.619824 | -1.418653 |
| 11               | 1                | 0              | 3.596003                | -0.771123 | -2.308349 |
| 12               | 7                | 0              | 2.335002                | -1.538667 | 0.528345  |
| 13               | 1                | 0              | 2.142066                | -0.570610 | 0.775029  |
| 14               | 7                | 0              | -1.237123               | -2.094383 | 0.563634  |
| 15               | 7                | 0              | -2.114340               | -2.374167 | -0.456116 |
| 16               | 1                | 0              | -1.953764               | -3.124117 | -1.117553 |
| 17               | 7                | 0              | -3.321665               | -0.528095 | 0.149502  |
| 18               | 1                | 0              | -2.682822               | -0.546980 | 0.938323  |
| 19               | 6                | 0              | 0.255027                | 2.263520  | 1.190880  |
| 20               | 6                | 0              | 2.377380                | 3.181159  | 0.246581  |
| 21               | 1                | 0              | 2.849228                | 2.467065  | 0.920205  |
| 22               | 6                | 0              | 2.976619                | 3.034464  | -1.154635 |
| 23               | 1                | 0              | 2.384842                | 3.610944  | -1.877933 |
| 24               | 1                | 0              | 3.963737                | 3.513099  | -1.159232 |
| 25               | 6                | 0              | 3.159529                | 1.636637  | -1.692435 |
| 26               | 6                | 0              | 2.920235                | -1.734211 | -0.659410 |
| 27               | 6                | 0              | 2.102834                | -2.565386 | 1.549957  |
| 28               | 1                | 0              | 2.378064                | -3.511895 | 1.085788  |
| 29               | 6                | 0              | 0.614364                | -2.605702 | 1.962658  |
| 30               | 1                | 0              | 0.522014                | -3.357928 | 2.754920  |
| 31               | 1                | 0              | 0.320903                | -1.641595 | 2.384901  |
| 32               | 6                | 0              | -0.336358               | -2.965752 | 0.850903  |
| 33               | 6                | 0              | -3.160250               | -1.535780 | -0.719980 |
| 34               | 6                | 0              | -4.434162               | 0.424679  | 0.169208  |
| 35               | 1                | 0              | -4.833274               | 0.445682  | -0.844498 |
| 36               | 6                | 0              | -3.919811               | 1.832687  | 0.548023  |
| 37               | 1                | 0              | -4.787064               | 2.499155  | 0.556241  |
| 38               | 1                | 0              | -3.551801               | 1.817358  | 1.577693  |
| 39               | 6                | 0              | -2.907351               | 2.410074  | -0.416605 |
| 40               | 6                | 0              | 2.580456                | 4.601482  | 0.790460  |
| 41               | 1                | 0              | 2.125674                | 4.697432  | 1.778193  |
| 42               | 1                | 0              | 2.129201                | 5.345066  | 0.126931  |
| 43               | 1                | 0              | 3.646891                | 4.823629  | 0.880749  |
| 44               | 6                | 0              | 3.675204                | 1.513666  | -3.104201 |
| 45               | 1                | 0              | 2.995011                | 0.918956  | -3.722879 |
| 46               | 1                | 0              | 4.657508                | 1.028781  | -3.127013 |
| 47               | 1                | 0              | 3.780277                | 2.494428  | -3.566131 |
| 48               | 6                | 0              | 3.006646                | -2.323630 | 2.764060  |
| 49               | 1                | 0              | 4.056323                | -2.320960 | 2.462704  |
| 50               | 1                | 0              | 2.863054                | -3.113736 | 3.505084  |
| 51               | 1                | 0              | 2.780111                | -1.364775 | 3.238823  |
| 52               | 6                | 0              | -0.202307               | -4.301838 | 0.169159  |
| 53               | 1                | 0              | -1.172029               | -4.805098 | 0.103892  |
| 54               | 1                | 0              | 0.479664                | -4.951566 | 0.716160  |
| 55               | 1                | 0              | 0.192467                | -4.193423 | -0.846668 |
| 56               | 6                | 0              | -5.538100               | -0.034961 | 1.128447  |
| 57               | 1                | 0              | -5.900906               | -1.023514 | 0.840432  |
| 58               | 1                | 0              | -6.379431               | 0.661844  | 1.100620  |

|    |   |   |           |           |           |
|----|---|---|-----------|-----------|-----------|
| 59 | 1 | 0 | -5.168100 | -0.086736 | 2.156489  |
| 60 | 6 | 0 | -3.425213 | 2.903578  | -1.738868 |
| 61 | 1 | 0 | -2.610266 | 3.287617  | -2.351455 |
| 62 | 1 | 0 | -4.163433 | 3.697564  | -1.585249 |
| 63 | 1 | 0 | -3.929068 | 2.100900  | -2.286089 |

### EtOH solution

**Data 62:** Cartesian coordinates and energies of the optimized geometry for the most stable conformer of macrocycle **7** in EtOH solution.

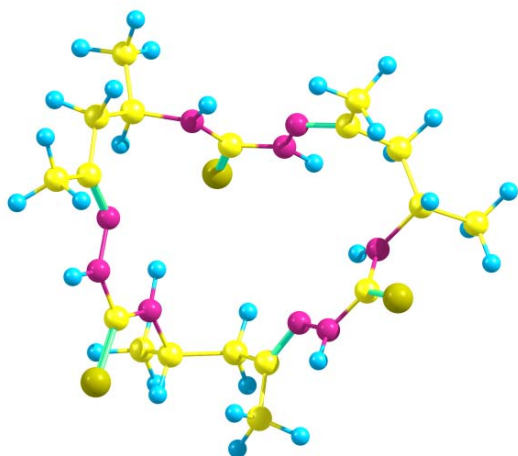

|                                              |                             |
|----------------------------------------------|-----------------------------|
| Electronic Energy =                          | -2393.55438359 a.u.         |
| Zero-point correction=                       | 0.525503 (Hartree/Particle) |
| Thermal correction to Energy=                | 0.560116                    |
| Thermal correction to Enthalpy=              | 0.561061                    |
| Thermal correction to Gibbs Free Energy=     | 0.457418                    |
| Sum of electronic and zero-point Energies=   | -2393.028880                |
| Sum of electronic and thermal Energies=      | -2392.994267                |
| Sum of electronic and thermal Enthalpies=    | -2392.993323                |
| Sum of electronic and thermal Free Energies= | -2393.096966                |

Standard orientation:

| Center Number | Atomic Number | Atomic Type | Coordinates (Angstroms) |           |           |
|---------------|---------------|-------------|-------------------------|-----------|-----------|
|               |               |             | X                       | Y         | Z         |
| 1             | 16            | 0           | 3.382033                | -3.252194 | -1.304299 |
| 2             | 16            | 0           | 0.905118                | 1.702013  | 2.667391  |
| 3             | 16            | 0           | -4.147588               | -1.835349 | -2.073359 |
| 4             | 7             | 0           | -1.635055               | 2.544489  | -0.211196 |
| 5             | 7             | 0           | -1.077231               | 2.118635  | 0.963960  |
| 6             | 1             | 0           | -1.618549               | 1.725673  | 1.723237  |
| 7             | 7             | 0           | 0.962447                | 2.839199  | 0.209624  |
| 8             | 1             | 0           | 0.414390                | 3.141280  | -0.589974 |
| 9             | 7             | 0           | 2.906332                | 0.631046  | -0.927553 |
| 10            | 7             | 0           | 3.128856                | -0.629199 | -1.421905 |
| 11            | 1             | 0           | 3.584355                | -0.783083 | -2.313210 |
| 12            | 7             | 0           | 2.329349                | -1.543976 | 0.527833  |
| 13            | 1             | 0           | 2.140986                | -0.575035 | 0.774553  |
| 14            | 7             | 0           | -1.243425               | -2.091969 | 0.566294  |
| 15            | 7             | 0           | -2.122092               | -2.371064 | -0.452269 |
| 16            | 1             | 0           | -1.963871               | -3.122151 | -1.112968 |
| 17            | 7             | 0           | -3.321110               | -0.518259 | 0.149110  |
| 18            | 1             | 0           | -2.680570               | -0.537059 | 0.936544  |
| 19            | 6             | 0           | 0.264258                | 2.265148  | 1.191319  |

|    |   |   |           |           |           |
|----|---|---|-----------|-----------|-----------|
| 20 | 6 | 0 | 2.390013  | 3.173649  | 0.246063  |
| 21 | 1 | 0 | 2.859124  | 2.456643  | 0.918535  |
| 22 | 6 | 0 | 2.987317  | 3.025600  | -1.155870 |
| 23 | 1 | 0 | 2.397478  | 3.605659  | -1.877973 |
| 24 | 1 | 0 | 3.976688  | 3.499600  | -1.160950 |
| 25 | 6 | 0 | 3.162730  | 1.627249  | -1.695031 |
| 26 | 6 | 0 | 2.909725  | -1.742784 | -0.661810 |
| 27 | 6 | 0 | 2.095758  | -2.569198 | 1.550471  |
| 28 | 1 | 0 | 2.368043  | -3.516780 | 1.086694  |
| 29 | 6 | 0 | 0.607644  | -2.605367 | 1.965072  |
| 30 | 1 | 0 | 0.514506  | -3.355851 | 2.758915  |
| 31 | 1 | 0 | 0.316949  | -1.639719 | 2.385721  |
| 32 | 6 | 0 | -0.345060 | -2.965303 | 0.854979  |
| 33 | 6 | 0 | -3.164877 | -1.529092 | -0.717939 |
| 34 | 6 | 0 | -4.430432 | 0.438012  | 0.167868  |
| 35 | 1 | 0 | -4.828799 | 0.460122  | -0.846134 |
| 36 | 6 | 0 | -3.911502 | 1.844239  | 0.546935  |
| 37 | 1 | 0 | -4.776584 | 2.513580  | 0.555577  |
| 38 | 1 | 0 | -3.543421 | 1.827305  | 1.576620  |
| 39 | 6 | 0 | -2.897278 | 2.418839  | -0.417582 |
| 40 | 6 | 0 | 2.600113  | 4.592342  | 0.791521  |
| 41 | 1 | 0 | 2.146384  | 4.688972  | 1.779654  |
| 42 | 1 | 0 | 2.151955  | 5.338976  | 0.129272  |
| 43 | 1 | 0 | 3.667624  | 4.809427  | 0.881583  |
| 44 | 6 | 0 | 3.675139  | 1.502507  | -3.107867 |
| 45 | 1 | 0 | 2.989912  | 0.913070  | -3.726072 |
| 46 | 1 | 0 | 4.654115  | 1.011039  | -3.133067 |
| 47 | 1 | 0 | 3.785959  | 2.483051  | -3.568970 |
| 48 | 6 | 0 | 3.001663  | -2.328601 | 2.763254  |
| 49 | 1 | 0 | 4.050959  | -2.328971 | 2.460592  |
| 50 | 1 | 0 | 2.856981  | -3.117601 | 3.505269  |
| 51 | 1 | 0 | 2.778206  | -1.368688 | 3.237339  |
| 52 | 6 | 0 | -0.215105 | -4.303336 | 0.176205  |
| 53 | 1 | 0 | -1.186878 | -4.802273 | 0.108360  |
| 54 | 1 | 0 | 0.461907  | -4.955164 | 0.726943  |
| 55 | 1 | 0 | 0.184274  | -4.198750 | -0.838219 |
| 56 | 6 | 0 | -5.536740 | -0.017739 | 1.126274  |
| 57 | 1 | 0 | -5.902437 | -1.005148 | 0.838085  |
| 58 | 1 | 0 | -6.375899 | 0.681677  | 1.097597  |
| 59 | 1 | 0 | -5.167840 | -0.070516 | 2.154681  |
| 60 | 6 | 0 | -3.413362 | 2.911683  | -1.740799 |
| 61 | 1 | 0 | -2.597480 | 3.295305  | -2.352394 |
| 62 | 1 | 0 | -4.151793 | 3.705810  | -1.588832 |
| 63 | 1 | 0 | -3.916223 | 2.108658  | -2.288424 |

### Other diastereomers of 21-membered cyclic tris-thiosemicarbazone **7**

*(1Z,5R\*,7E,12S\*,14E,19R\*)-diastereomer*

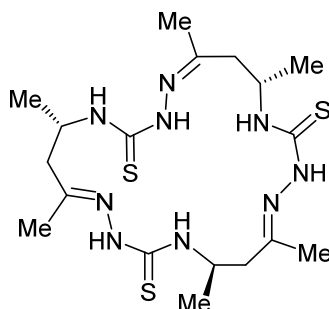

DMSO solution

**Data 63:** Cartesian coordinates and energies of the optimized geometry for the (1Z,5R\*,7E,12S\*,14E,19R\*)-diastereomer of macrocycle **7** in DMSO solution.

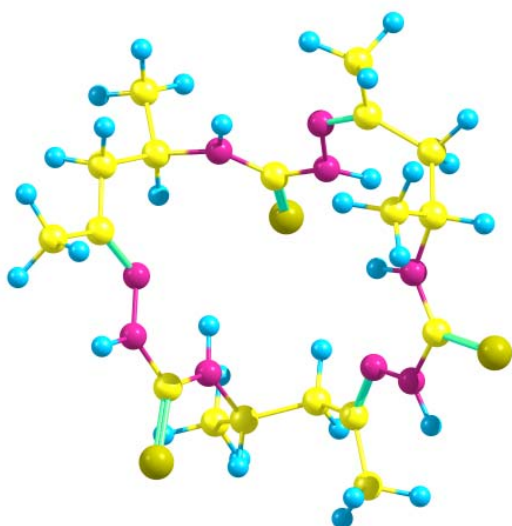

Electronic Energy = -2393.54784461 a.u.  
 Zero-point correction= 0.526115 (Hartree/Particle)  
 Thermal correction to Energy= 0.560352  
 Thermal correction to Enthalpy= 0.561296  
 Thermal correction to Gibbs Free Energy= 0.458841  
 Sum of electronic and zero-point Energies= -2393.021730  
 Sum of electronic and thermal Energies= -2392.987492  
 Sum of electronic and thermal Enthalpies= -2392.986548  
 Sum of electronic and thermal Free Energies= -2393.089004

Standard orientation:

| Center Number | Atomic Number | Atomic Type | Coordinates (Angstroms) |           |           |
|---------------|---------------|-------------|-------------------------|-----------|-----------|
|               |               |             | X                       | Y         | Z         |
| 1             | 16            | 0           | 2.254306                | -3.431171 | -2.087750 |
| 2             | 16            | 0           | 1.163208                | 0.942922  | 2.666367  |
| 3             | 16            | 0           | -5.118650               | -1.659400 | -0.739335 |
| 4             | 7             | 0           | -1.094115               | 3.125895  | 0.321767  |
| 5             | 7             | 0           | -0.687900               | 2.090139  | 1.140930  |
| 6             | 1             | 0           | -1.298700               | 1.743723  | 1.873442  |
| 7             | 7             | 0           | 1.463993                | 2.631851  | 0.574641  |
| 8             | 1             | 0           | 0.987003                | 3.247812  | -0.077649 |
| 9             | 7             | 0           | 2.814997                | 0.319705  | -1.051529 |
| 10            | 7             | 0           | 2.655300                | -0.836307 | -1.770963 |
| 11            | 1             | 0           | 2.882981                | -0.897321 | -2.755902 |
| 12            | 7             | 0           | 2.022150                | -1.912545 | 0.150975  |
| 13            | 1             | 0           | 2.108078                | -0.983376 | 0.558242  |
| 14            | 7             | 0           | -1.505329               | -2.025907 | 0.753904  |
| 15            | 7             | 0           | -2.690317               | -2.261497 | 0.097778  |
| 16            | 1             | 0           | -3.076376               | -3.195442 | 0.026106  |
| 17            | 7             | 0           | -3.084258               | 0.002282  | -0.072901 |
| 18            | 1             | 0           | -2.110334               | 0.089355  | 0.198570  |
| 19            | 6             | 0           | 0.661166                | 1.954791  | 1.394128  |
| 20            | 6             | 0           | 2.930412                | 2.632904  | 0.583563  |
| 21            | 1             | 0           | 3.235948                | 1.713952  | 1.081169  |
| 22            | 6             | 0           | 3.442895                | 2.629440  | -0.861283 |
| 23            | 1             | 0           | 3.006368                | 3.472082  | -1.412746 |
| 24            | 1             | 0           | 4.521429                | 2.830661  | -0.848963 |
| 25            | 6             | 0           | 3.227020                | 1.368591  | -1.664418 |
| 26            | 6             | 0           | 2.304403                | -2.003968 | -1.152255 |
| 27            | 6             | 0           | 1.790138                | -3.027831 | 1.072775  |
| 28            | 1             | 0           | 1.718933                | -3.923435 | 0.455814  |
| 29            | 6             | 0           | 0.469790                | -2.808825 | 1.845919  |
| 30            | 1             | 0           | 0.462030                | -3.507884 | 2.689511  |
| 31            | 1             | 0           | 0.453539                | -1.796474 | 2.254377  |
| 32            | 6             | 0           | -0.779402               | -3.048808 | 1.041784  |
| 33            | 6             | 0           | -3.551211               | -1.247015 | -0.208677 |
| 34            | 6             | 0           | -3.858124               | 1.206281  | -0.416035 |
| 35            | 6             | 0           | -3.488342               | 2.402423  | 0.509157  |
| 36            | 1             | 0           | -4.373639               | 3.039670  | 0.560478  |

|    |   |   |           |           |           |
|----|---|---|-----------|-----------|-----------|
| 37 | 1 | 0 | -3.333940 | 2.024504  | 1.523550  |
| 38 | 6 | 0 | -2.338563 | 3.282923  | 0.051337  |
| 39 | 6 | 0 | 3.468236  | 3.837656  | 1.365381  |
| 40 | 1 | 0 | 3.077721  | 3.833084  | 2.384864  |
| 41 | 1 | 0 | 3.179240  | 4.778689  | 0.888195  |
| 42 | 1 | 0 | 4.559365  | 3.799713  | 1.415295  |
| 43 | 6 | 0 | 3.549882  | 1.424336  | -3.135954 |
| 44 | 1 | 0 | 2.662253  | 1.212886  | -3.742160 |
| 45 | 1 | 0 | 4.318140  | 0.690667  | -3.402634 |
| 46 | 1 | 0 | 3.919141  | 2.410065  | -3.416009 |
| 47 | 6 | 0 | 2.978712  | -3.172081 | 2.031259  |
| 48 | 1 | 0 | 3.906196  | -3.309752 | 1.471241  |
| 49 | 1 | 0 | 2.835983  | -4.038629 | 2.681321  |
| 50 | 1 | 0 | 3.084139  | -2.285002 | 2.662663  |
| 51 | 6 | 0 | -1.131938 | -4.467412 | 0.671160  |
| 52 | 1 | 0 | -2.025254 | -4.802691 | 1.211514  |
| 53 | 1 | 0 | -0.322744 | -5.150003 | 0.926757  |
| 54 | 1 | 0 | -1.333676 | -4.564587 | -0.399908 |
| 55 | 6 | 0 | -2.681628 | 4.500151  | -0.763828 |
| 56 | 1 | 0 | -1.777142 | 5.000412  | -1.108498 |
| 57 | 1 | 0 | -3.259747 | 5.199606  | -0.149718 |
| 58 | 1 | 0 | -3.304646 | 4.245299  | -1.623649 |
| 59 | 6 | 0 | -3.762118 | 1.511627  | -1.914794 |
| 60 | 1 | 0 | -4.424594 | 2.338436  | -2.181069 |
| 61 | 1 | 0 | -2.741539 | 1.770833  | -2.207552 |
| 62 | 1 | 0 | -4.074038 | 0.636050  | -2.485364 |
| 63 | 1 | 0 | -4.893555 | 0.953044  | -0.187317 |

*(1Z,5R\*,7E,12R\*,14E,19R\*)-diastereomer*

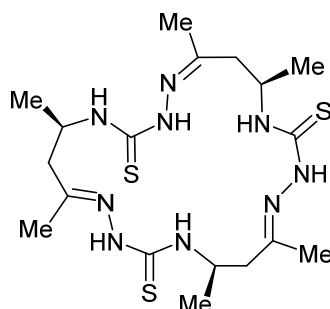

DMSO solution

**Data 64:** Cartesian coordinates and energies of the optimized geometry for the *(1Z,5R\*,7E,12R\*,14E,19R\*)-diastereomer* of macrocycle **7** in DMSO solution.

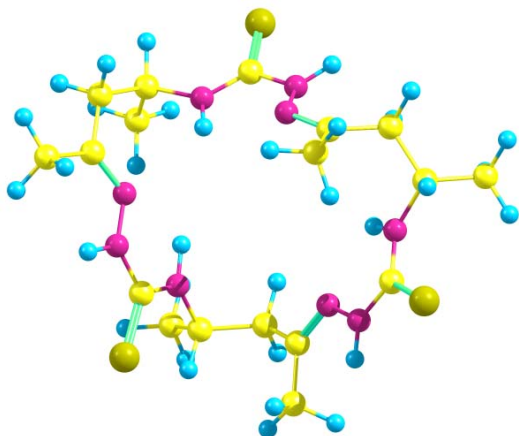

Electronic Energy = -2393.54996199 a.u.  
 Zero-point correction= 0.525723 (Hartree/Particle)  
 Thermal correction to Energy= 0.560203  
 Thermal correction to Enthalpy= 0.561148  
 Thermal correction to Gibbs Free Energy= 0.458788  
 Sum of electronic and zero-point Energies= -2393.024239  
 Sum of electronic and thermal Energies= -2392.989759  
 Sum of electronic and thermal Enthalpies= -2392.988814  
 Sum of electronic and thermal Free Energies= -2393.091174

Standard orientation:

| Center<br>Number | Atomic<br>Number | Atomic<br>Type | Coordinates (Angstroms) |           |           |
|------------------|------------------|----------------|-------------------------|-----------|-----------|
|                  |                  |                | X                       | Y         | Z         |
| 1                | 16               | 0              | -1.507845               | 4.173831  | -1.312232 |
| 2                | 16               | 0              | -1.942941               | -4.264785 | 1.865234  |
| 3                | 16               | 0              | 5.191730                | 0.725224  | -1.321093 |
| 4                | 7                | 0              | 0.301284                | -2.486682 | -0.806538 |
| 5                | 7                | 0              | -0.080882               | -3.119613 | 0.360445  |
| 6                | 1                | 0              | 0.472933                | -3.872828 | 0.749445  |
| 7                | 7                | 0              | -2.157778               | -2.180294 | 0.150837  |
| 8                | 1                | 0              | -1.677104               | -1.548489 | -0.479193 |
| 9                | 7                | 0              | -2.893806               | 0.514599  | -0.921444 |
| 10               | 7                | 0              | -2.496472               | 1.726051  | -1.432734 |
| 11               | 1                | 0              | -2.817986               | 2.058852  | -2.333516 |
| 12               | 7                | 0              | -1.449929               | 2.204828  | 0.554693  |
| 13               | 1                | 0              | -1.755108               | 1.264935  | 0.787807  |
| 14               | 7                | 0              | 2.128470                | 1.549851  | 1.003036  |
| 15               | 7                | 0              | 3.249509                | 1.657489  | 0.219152  |
| 16               | 1                | 0              | 3.575190                | 2.546293  | -0.141092 |
| 17               | 7                | 0              | 3.423198                | -0.625956 | 0.221920  |
| 18               | 1                | 0              | 2.656064                | -0.553601 | 0.883377  |
| 19               | 6                | 0              | -1.403449               | -3.119146 | 0.725091  |
| 20               | 6                | 0              | -3.612365               | -2.030394 | 0.281816  |
| 21               | 6                | 0              | -4.187446               | -1.522434 | -1.050717 |
| 22               | 1                | 0              | -3.994340               | -2.272082 | -1.828282 |
| 23               | 1                | 0              | -5.279320               | -1.483193 | -0.956842 |
| 24               | 6                | 0              | -3.734418               | -0.185591 | -1.594860 |
| 25               | 6                | 0              | -1.818737               | 2.629967  | -0.661794 |
| 26               | 6                | 0              | -0.971699               | 3.047631  | 1.657297  |
| 27               | 1                | 0              | -0.781934               | 4.028756  | 1.222987  |
| 28               | 6                | 0              | 0.333842                | 2.482759  | 2.260445  |
| 29               | 1                | 0              | 0.519703                | 3.026358  | 3.193854  |
| 30               | 1                | 0              | 0.200086                | 1.429199  | 2.517762  |
| 31               | 6                | 0              | 1.550523                | 2.632285  | 1.386301  |
| 32               | 6                | 0              | 3.891627                | 0.541018  | -0.237371 |
| 33               | 6                | 0              | 3.892589                | -1.959267 | -0.171627 |
| 34               | 1                | 0              | 4.334478                | -1.850249 | -1.161983 |
| 35               | 6                | 0              | 2.683756                | -2.915094 | -0.239125 |
| 36               | 1                | 0              | 3.039025                | -3.877482 | -0.624778 |
| 37               | 1                | 0              | 2.335862                | -3.095879 | 0.781213  |
| 38               | 6                | 0              | 1.548848                | -2.418625 | -1.109058 |
| 39               | 6                | 0              | -4.314871               | 0.232361  | -2.921988 |
| 40               | 1                | 0              | -3.532942               | 0.316491  | -3.684663 |
| 41               | 1                | 0              | -4.814796               | 1.203642  | -2.846376 |
| 42               | 1                | 0              | -5.045471               | -0.495120 | -3.272720 |
| 43               | 6                | 0              | -2.063768               | 3.176250  | 2.726226  |
| 44               | 1                | 0              | -2.981778               | 3.574002  | 2.288606  |
| 45               | 1                | 0              | -1.737943               | 3.853494  | 3.519098  |
| 46               | 1                | 0              | -2.288288               | 2.205720  | 3.178652  |
| 47               | 6                | 0              | 2.039154                | 4.016731  | 1.045798  |
| 48               | 1                | 0              | 3.082168                | 4.147066  | 1.353409  |
| 49               | 1                | 0              | 1.446087                | 4.778188  | 1.549960  |
| 50               | 1                | 0              | 1.981306                | 4.208213  | -0.030880 |
| 51               | 6                | 0              | 4.961595                | -2.487134 | 0.790009  |
| 52               | 1                | 0              | 5.813677                | -1.805703 | 0.818679  |
| 53               | 1                | 0              | 5.315864                | -3.467245 | 0.460614  |
| 54               | 1                | 0              | 4.561503                | -2.587375 | 1.802745  |
| 55               | 6                | 0              | 1.872519                | -1.828440 | -2.453557 |
| 56               | 1                | 0              | 0.955726                | -1.548088 | -2.970852 |
| 57               | 1                | 0              | 2.411670                | -2.561218 | -3.063773 |
| 58               | 1                | 0              | 2.515837                | -0.949453 | -2.366567 |

|    |   |   |           |           |          |
|----|---|---|-----------|-----------|----------|
| 59 | 6 | 0 | -4.021606 | -1.201021 | 1.506096 |
| 60 | 1 | 0 | -5.111926 | -1.188821 | 1.590110 |
| 61 | 1 | 0 | -3.618019 | -1.654018 | 2.413073 |
| 62 | 1 | 0 | -3.670357 | -0.172743 | 1.436129 |
| 63 | 1 | 0 | -4.006709 | -3.038983 | 0.423987 |

(1Z,5R\*,7E,12R\*,14E,19S\*)-diastereomer

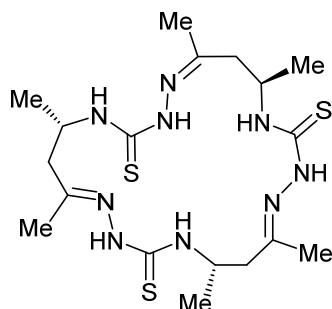

DMSO solution

**Data 65:** Cartesian coordinates and energies of the optimized geometry for the (1Z,5R\*,7E,12R\*,14E,19S\*)-diastereomer of macrocycle 7 in DMSO solution.

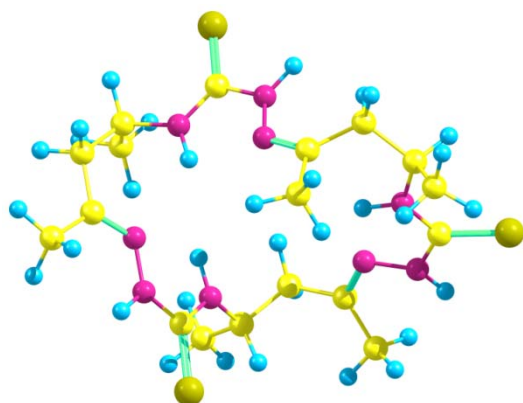

|                                              |                             |
|----------------------------------------------|-----------------------------|
| Electronic Energy =                          | -2393.53832030 a.u.         |
| Zero-point correction=                       | 0.525919 (Hartree/Particle) |
| Thermal correction to Energy=                | 0.560398                    |
| Thermal correction to Enthalpy=              | 0.561342                    |
| Thermal correction to Gibbs Free Energy=     | 0.458386                    |
| Sum of electronic and zero-point Energies=   | -2393.012401                |
| Sum of electronic and thermal Energies=      | -2392.977922                |
| Sum of electronic and thermal Enthalpies=    | -2392.976978                |
| Sum of electronic and thermal Free Energies= | -2393.079934                |

Standard orientation:

| Center Number | Atomic Number | Atomic Type | Coordinates (Angstroms) |           |           |
|---------------|---------------|-------------|-------------------------|-----------|-----------|
|               |               |             | X                       | Y         | Z         |
| 1             | 16            | 0           | 1.528037                | 3.858431  | 1.991642  |
| 2             | 16            | 0           | 1.698225                | -3.944226 | -2.380664 |
| 3             | 16            | 0           | -5.898397               | 0.087106  | -0.247571 |
| 4             | 7             | 0           | -0.018676               | -2.318475 | 0.736615  |
| 5             | 7             | 0           | 0.144667                | -2.926399 | -0.481025 |

|    |   |   |           |           |           |
|----|---|---|-----------|-----------|-----------|
| 6  | 1 | 0 | -0.495847 | -3.631001 | -0.825952 |
| 7  | 7 | 0 | 2.238189  | -2.013117 | -0.559699 |
| 8  | 1 | 0 | 1.873760  | -1.437748 | 0.191643  |
| 9  | 7 | 0 | 3.087318  | 0.456346  | 0.776133  |
| 10 | 7 | 0 | 2.729479  | 1.543379  | 1.535240  |
| 11 | 1 | 0 | 3.151869  | 1.736847  | 2.435085  |
| 12 | 7 | 0 | 1.336480  | 2.217542  | -0.157333 |
| 13 | 1 | 0 | 1.697051  | 1.375048  | -0.593946 |
| 14 | 7 | 0 | -2.275864 | 1.363962  | -1.030354 |
| 15 | 7 | 0 | -3.619033 | 1.354756  | -0.713713 |
| 16 | 1 | 0 | -4.253864 | 2.028258  | -1.126252 |
| 17 | 7 | 0 | -3.355280 | -0.688685 | 0.280230  |
| 18 | 1 | 0 | -2.374188 | -0.457305 | 0.160590  |
| 19 | 6 | 0 | 1.384724  | -2.898015 | -1.075216 |
| 20 | 6 | 0 | 3.646115  | -1.825440 | -0.923863 |
| 21 | 6 | 0 | 4.451718  | -1.488014 | 0.344028  |
| 22 | 1 | 0 | 4.427572  | -2.352644 | 1.019152  |
| 23 | 1 | 0 | 5.504954  | -1.375305 | 0.060786  |
| 24 | 6 | 0 | 4.068710  | -0.275477 | 1.165043  |
| 25 | 6 | 0 | 1.861738  | 2.482119  | 1.048373  |
| 26 | 6 | 0 | 0.681508  | 3.189375  | -1.043744 |
| 27 | 1 | 0 | 0.174914  | 3.905499  | -0.396429 |
| 28 | 6 | 0 | -0.347553 | 2.449019  | -1.938662 |
| 29 | 1 | 0 | -0.344656 | 2.926605  | -2.923645 |
| 30 | 1 | 0 | -0.032961 | 1.414595  | -2.090498 |
| 31 | 6 | 0 | -1.771737 | 2.471478  | -1.444943 |
| 32 | 6 | 0 | -4.203691 | 0.221214  | -0.213068 |
| 33 | 6 | 0 | -3.701214 | -1.999899 | 0.850081  |
| 34 | 6 | 0 | -2.440343 | -2.902427 | 0.797905  |
| 35 | 1 | 0 | -2.666366 | -3.814659 | 1.359916  |
| 36 | 1 | 0 | -2.305985 | -3.202508 | -0.242198 |
| 37 | 6 | 0 | -1.154000 | -2.307100 | 1.340688  |
| 38 | 6 | 0 | 4.873614  | -0.020713 | 2.413170  |
| 39 | 1 | 0 | 4.251657  | -0.117114 | 3.309988  |
| 40 | 1 | 0 | 5.298565  | 0.988308  | 2.407630  |
| 41 | 1 | 0 | 5.693588  | -0.732346 | 2.498843  |
| 42 | 6 | 0 | 1.728649  | 3.932858  | -1.884064 |
| 43 | 1 | 0 | 2.470506  | 4.408477  | -1.239320 |
| 44 | 1 | 0 | 1.246945  | 4.708130  | -2.485190 |
| 45 | 1 | 0 | 2.244199  | 3.245310  | -2.561200 |
| 46 | 6 | 0 | -2.534222 | 3.767009  | -1.542678 |
| 47 | 1 | 0 | -3.218724 | 3.750329  | -2.399367 |
| 48 | 1 | 0 | -1.857150 | 4.608187  | -1.688870 |
| 49 | 1 | 0 | -3.127853 | 3.951552  | -0.643350 |
| 50 | 6 | 0 | -1.130338 | -1.675871 | 2.709499  |
| 51 | 1 | 0 | -0.102922 | -1.443976 | 2.987091  |
| 52 | 1 | 0 | -1.555594 | -2.354503 | 3.454340  |
| 53 | 1 | 0 | -1.713601 | -0.751998 | 2.740186  |
| 54 | 6 | 0 | 3.834094  | -0.826575 | -2.073395 |
| 55 | 1 | 0 | 4.890243  | -0.785252 | -2.353790 |
| 56 | 1 | 0 | 3.264880  | -1.151374 | -2.946260 |
| 57 | 1 | 0 | 3.513003  | 0.176706  | -1.795429 |
| 58 | 1 | 0 | 4.002460  | -2.797707 | -1.270420 |
| 59 | 6 | 0 | -4.365832 | -1.901421 | 2.230180  |
| 60 | 1 | 0 | -4.584502 | -2.907342 | 2.597965  |
| 61 | 1 | 0 | -3.742834 | -1.393205 | 2.964214  |
| 62 | 1 | 0 | -5.306870 | -1.358550 | 2.144745  |
| 63 | 1 | 0 | -4.430685 | -2.458153 | 0.176767  |

(1E,5R\*,7E,12S\*,14E,19S\*)-diastereomer

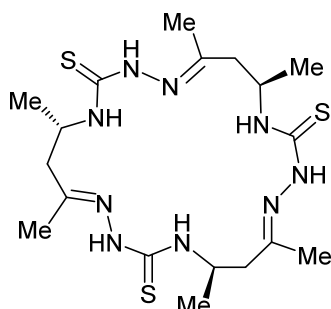



## DMSO solution

**Data 66:** Cartesian coordinates and energies of the optimized geometry for the (1*E*,5*R*\*,7*E*,12*R*\*,14*E*,19*S*\*)-diastereomer of macrocycle **7** in DMSO solution.

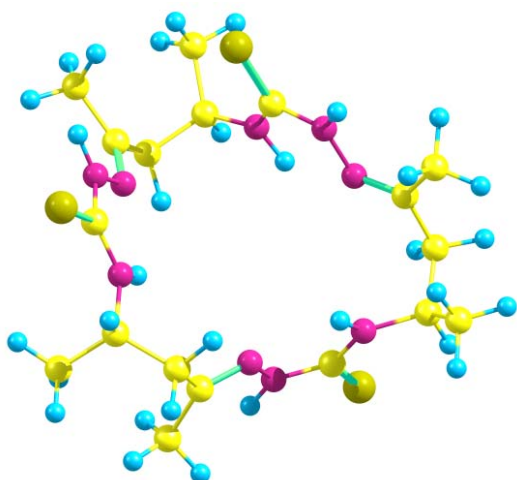

|                                              |                             |
|----------------------------------------------|-----------------------------|
| Electronic Energy =                          | -2393.54061102 a.u.         |
| Zero-point correction=                       | 0.526851 (Hartree/Particle) |
| Thermal correction to Energy=                | 0.560893                    |
| Thermal correction to Enthalpy=              | 0.561837                    |
| Thermal correction to Gibbs Free Energy=     | 0.460727                    |
| Sum of electronic and zero-point Energies=   | -2393.013760                |
| Sum of electronic and thermal Energies=      | -2392.979718                |
| Sum of electronic and thermal Enthalpies=    | -2392.978774                |
| Sum of electronic and thermal Free Energies= | -2393.079884                |

Standard orientation:

| Center Number | Atomic Number | Atomic Type | Coordinates (Angstroms) |           |           |
|---------------|---------------|-------------|-------------------------|-----------|-----------|
|               |               |             | X                       | Y         | Z         |
| 1             | 7             | 0           | 0.691734                | -2.716796 | -1.151031 |
| 2             | 6             | 0           | -0.433965               | -2.997471 | -0.416410 |
| 3             | 16            | 0           | -1.828006               | -3.463578 | -1.274188 |
| 4             | 7             | 0           | -0.275628               | -2.878850 | 0.907775  |
| 5             | 6             | 0           | -2.004295               | -1.773754 | 2.362880  |
| 6             | 6             | 0           | -2.977113               | -1.262810 | 1.333930  |
| 7             | 6             | 0           | -4.310507               | -1.939075 | 1.146782  |
| 8             | 7             | 0           | -2.612034               | -0.204810 | 0.697530  |
| 9             | 7             | 0           | -3.458313               | 0.293500  | -0.260861 |
| 10            | 6             | 0           | -3.221289               | 1.503828  | -0.846081 |
| 11            | 7             | 0           | -2.151163               | 2.172956  | -0.395456 |
| 12            | 16            | 0           | -4.287679               | 2.044395  | -2.061846 |
| 13            | 6             | 0           | -1.835929               | 3.571252  | -0.705322 |
| 14            | 6             | 0           | -2.503756               | 4.511690  | 0.306653  |
| 15            | 6             | 0           | 0.585587                | 3.456493  | 0.297038  |
| 16            | 7             | 0           | 1.371750                | 2.445342  | 0.160909  |
| 17            | 6             | 0           | -0.309420               | 3.757800  | -0.881965 |
| 18            | 7             | 0           | 2.227531                | 2.141844  | 1.188482  |
| 19            | 6             | 0           | 3.269322                | 1.274455  | 1.002116  |
| 20            | 7             | 0           | 3.380771                | 0.754515  | -0.225085 |
| 21            | 16            | 0           | 4.314951                | 0.960750  | 2.309469  |
| 22            | 6             | 0           | 2.955876                | -2.414168 | -2.737389 |
| 23            | 6             | 0           | 2.893335                | -2.114580 | -1.261057 |
| 24            | 6             | 0           | 4.113982                | -1.618184 | -0.529263 |
| 25            | 1             | 0           | -4.242521               | -0.238451 | -0.618261 |
| 26            | 1             | 0           | -1.643034               | 1.715364  | 0.355257  |
| 27            | 1             | 0           | 2.156628                | 2.575347  | 2.100910  |
| 28            | 1             | 0           | 2.665756                | 1.046266  | -0.883721 |
| 29            | 6             | 0           | -1.208359               | -3.069901 | 2.033434  |
| 30            | 6             | 0           | -2.035471               | -4.356022 | 1.968523  |

|    |   |   |           |           |           |
|----|---|---|-----------|-----------|-----------|
| 31 | 7 | 0 | 1.837760  | -2.281240 | -0.543926 |
| 32 | 1 | 0 | 0.650026  | -2.549416 | 1.165177  |
| 33 | 6 | 0 | 4.459701  | -0.113661 | -0.703256 |
| 34 | 6 | 0 | 4.842099  | 0.302248  | -2.125664 |
| 35 | 1 | 0 | 0.600712  | -2.791183 | -2.157104 |
| 36 | 6 | 0 | 0.589307  | 4.359594  | 1.504321  |
| 37 | 1 | 0 | -1.278518 | -0.982626 | 2.561698  |
| 38 | 1 | 0 | -2.545124 | -1.967568 | 3.295921  |
| 39 | 1 | 0 | -4.365576 | -2.443350 | 0.177066  |
| 40 | 1 | 0 | -5.122757 | -1.206159 | 1.196585  |
| 41 | 1 | 0 | -4.482412 | -2.684677 | 1.920735  |
| 42 | 1 | 0 | -2.275307 | 3.765414  | -1.684125 |
| 43 | 1 | 0 | -2.256625 | 5.552931  | 0.084259  |
| 44 | 1 | 0 | -3.588445 | 4.400465  | 0.246133  |
| 45 | 1 | 0 | -2.200101 | 4.293428  | 1.332266  |
| 46 | 1 | 0 | -0.151753 | 4.803099  | -1.170411 |
| 47 | 1 | 0 | 0.013822  | 3.132329  | -1.716061 |
| 48 | 1 | 0 | 3.975601  | -2.346247 | -3.110696 |
| 49 | 1 | 0 | 2.589881  | -3.426256 | -2.941137 |
| 50 | 1 | 0 | 2.338912  | -1.718584 | -3.317464 |
| 51 | 1 | 0 | 4.987957  | -2.192350 | -0.854529 |
| 52 | 1 | 0 | 3.972942  | -1.801448 | 0.537168  |
| 53 | 1 | 0 | -0.534895 | -3.187519 | 2.886156  |
| 54 | 1 | 0 | -2.771021 | -4.349854 | 1.168822  |
| 55 | 1 | 0 | -1.376294 | -5.213958 | 1.816904  |
| 56 | 1 | 0 | -2.548198 | -4.488669 | 2.924797  |
| 57 | 1 | 0 | 5.310190  | 0.070647  | -0.045408 |
| 58 | 1 | 0 | 4.000629  | 0.228666  | -2.819260 |
| 59 | 1 | 0 | 5.194118  | 1.336116  | -2.131234 |
| 60 | 1 | 0 | 5.646749  | -0.333762 | -2.500501 |
| 61 | 1 | 0 | 0.156546  | 3.865590  | 2.381478  |
| 62 | 1 | 0 | 0.019846  | 5.267217  | 1.318215  |
| 63 | 1 | 0 | 1.612535  | 4.652512  | 1.761438  |

**Table 19** Relative electronic ( $\Delta E$ , kcal/mol) and Gibbs free energies ( $\Delta G$ , kcal/mol) of macrocycle **7** and some its diastereomers in DMSO solution

| Compound                                                       | $\Delta E$ | $\Delta G$ |
|----------------------------------------------------------------|------------|------------|
| Macrocycle <b>7</b><br>(1Z,5R*,7E,12S*,14E,19S*)-configuration | 0.00       | 0.00       |
| (1Z,5R*,7E,12S*,14E,19R*)-diastereomer of <b>7</b>             | 4.78       | 5.72       |
| (1Z,5R*,7E,12R*,14E,19R*)-diastereomer of <b>7</b>             | 3.45       | 4.36       |
| (1Z,5R*,7E,12R*,14E,19S*)-diastereomer of <b>7</b>             | 10.76      | 11.41      |
| (1E,5R*,7E,12S*,14E,19S*)-diastereomer of <b>7</b>             | 9.32       | 11.45      |

### Hydrazinium tosylate

#### MeCN solution

**Data 67:** Cartesian coordinates and energies of the optimized geometry for the 1<sup>st</sup> conformer of hydrazonium tosylate in MeCN solution.

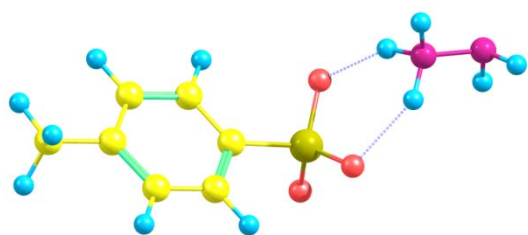

|                                              |                             |
|----------------------------------------------|-----------------------------|
| Electronic Energy =                          | -1007.49312906 a.u.         |
| Zero-point correction=                       | 0.199156 (Hartree/Particle) |
| Thermal correction to Energy=                | 0.213992                    |
| Thermal correction to Enthalpy=              | 0.214936                    |
| Thermal correction to Gibbs Free Energy=     | 0.153117                    |
| Sum of electronic and zero-point Energies=   | -1007.293973                |
| Sum of electronic and thermal Energies=      | -1007.279137                |
| Sum of electronic and thermal Enthalpies=    | -1007.278193                |
| Sum of electronic and thermal Free Energies= | -1007.340012                |

Standard orientation:

| Center Number | Atomic Number | Atomic Type | Coordinates (Angstroms) |           |           |
|---------------|---------------|-------------|-------------------------|-----------|-----------|
|               |               |             | X                       | Y         | Z         |
| 1             | 16            | 0           | -1.000221               | 0.775909  | -0.258047 |
| 2             | 8             | 0           | -1.609751               | 0.660423  | 1.107633  |
| 3             | 8             | 0           | -1.636750               | -0.199353 | -1.211499 |
| 4             | 8             | 0           | -0.987918               | 2.164320  | -0.776092 |
| 5             | 6             | 0           | 0.717215                | 0.257764  | -0.089994 |
| 6             | 6             | 0           | 1.441684                | 0.644699  | 1.038710  |
| 7             | 6             | 0           | 2.783686                | 0.295536  | 1.142387  |
| 8             | 6             | 0           | 3.424856                | -0.435953 | 0.131749  |
| 9             | 6             | 0           | 2.676906                | -0.809865 | -0.989173 |
| 10            | 6             | 0           | 1.329991                | -0.466635 | -1.108031 |
| 11            | 6             | 0           | 4.880191                | -0.810751 | 0.262880  |
| 12            | 7             | 0           | -3.454147               | -1.344357 | 0.481697  |
| 13            | 7             | 0           | -4.856215               | -1.077567 | 0.261341  |
| 14            | 1             | 0           | -3.337745               | -2.323258 | 0.745118  |
| 15            | 1             | 0           | -2.987048               | -0.727921 | 1.172215  |
| 16            | 1             | 0           | -2.909514               | -1.160313 | -0.391152 |
| 17            | 1             | 0           | -5.314095               | -1.116859 | 1.169244  |
| 18            | 1             | 0           | -4.919921               | -0.115890 | -0.065004 |
| 19            | 1             | 0           | 0.959451                | 1.203224  | 1.831577  |
| 20            | 1             | 0           | 3.341974                | 0.593886  | 2.023709  |
| 21            | 1             | 0           | 3.149429                | -1.379102 | -1.782460 |
| 22            | 1             | 0           | 0.760789                | -0.767832 | -1.978270 |
| 23            | 1             | 0           | 5.235552                | -1.341943 | -0.621559 |
| 24            | 1             | 0           | 5.503458                | 0.077690  | 0.399873  |
| 25            | 1             | 0           | 5.041913                | -1.454646 | 1.132691  |

**Data 68:** Cartesian coordinates and energies of the optimized geometry for the 2<sup>nd</sup> conformer of hydrazoneium tosylate in MeCN solution.

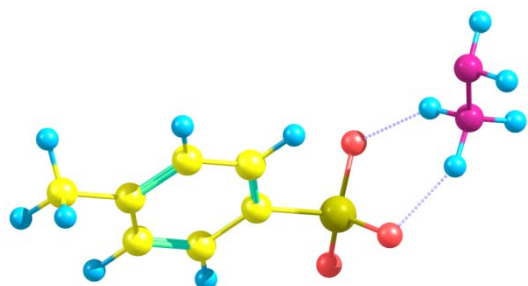

|                        |                             |
|------------------------|-----------------------------|
| Electronic Energy =    | -1007.49383351 a.u.         |
| Zero-point correction= | 0.199042 (Hartree/Particle) |

Thermal correction to Energy= 0.213814  
 Thermal correction to Enthalpy= 0.214758  
 Thermal correction to Gibbs Free Energy= 0.153361  
 Sum of electronic and zero-point Energies= -1007.294791  
 Sum of electronic and thermal Energies= -1007.280020  
 Sum of electronic and thermal Enthalpies= -1007.279075  
 Sum of electronic and thermal Free Energies= -1007.340472

Standard orientation:

| Center Number | Atomic Number | Atomic Type | Coordinates (Angstroms) |           |           |
|---------------|---------------|-------------|-------------------------|-----------|-----------|
|               |               |             | X                       | Y         | Z         |
| 1             | 6             | 0           | -0.822599               | 0.972347  | 0.047892  |
| 2             | 6             | 0           | -0.648265               | -0.412857 | 0.007367  |
| 3             | 6             | 0           | -1.749054               | -1.260946 | -0.043883 |
| 4             | 6             | 0           | -3.034254               | -0.716485 | -0.052634 |
| 5             | 6             | 0           | -3.236055               | 0.665782  | -0.009561 |
| 6             | 6             | 0           | -2.108184               | 1.499775  | 0.038906  |
| 7             | 6             | 0           | -4.624854               | 1.254329  | -0.001839 |
| 8             | 16            | 0           | 1.018255                | -1.097648 | 0.014671  |
| 9             | 8             | 0           | 0.878529                | -2.569574 | 0.015704  |
| 10            | 8             | 0           | 1.698152                | -0.564163 | -1.218680 |
| 11            | 8             | 0           | 1.690710                | -0.556552 | 1.245968  |
| 12            | 1             | 0           | 0.034878                | 1.633604  | 0.085890  |
| 13            | 1             | 0           | -1.602873               | -2.332803 | -0.076553 |
| 14            | 1             | 0           | -3.889921               | -1.381825 | -0.094157 |
| 15            | 1             | 0           | -2.239696               | 2.576364  | 0.069595  |
| 16            | 1             | 0           | -4.854955               | 1.695563  | 0.973294  |
| 17            | 1             | 0           | -5.380041               | 0.495233  | -0.212205 |
| 18            | 1             | 0           | -4.720752               | 2.049543  | -0.745966 |
| 19            | 7             | 0           | 3.639896                | 0.943200  | -0.004915 |
| 20            | 7             | 0           | 3.587394                | 2.381778  | -0.048510 |
| 21            | 1             | 0           | 3.111619                | 0.582511  | 0.814145  |
| 22            | 1             | 0           | 4.583465                | 0.545131  | -0.006875 |
| 23            | 1             | 0           | 3.083437                | 0.531892  | -0.785385 |
| 24            | 1             | 0           | 4.117360                | 2.727778  | 0.747378  |
| 25            | 1             | 0           | 4.074831                | 2.675176  | -0.891356 |

**Data 69:** Cartesian coordinates and energies of the optimized geometry for the 3<sup>rd</sup> conformer of hydrazonium tosylate in MeCN solution.

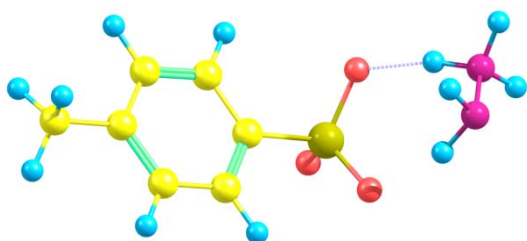

Electronic Energy = -1007.49501299 a.u.  
 Zero-point correction= 0.199071 (Hartree/Particle)  
 Thermal correction to Energy= 0.212846  
 Thermal correction to Enthalpy= 0.213791  
 Thermal correction to Gibbs Free Energy= 0.155592  
 Sum of electronic and zero-point Energies= -1007.295942  
 Sum of electronic and thermal Energies= -1007.282167  
 Sum of electronic and thermal Enthalpies= -1007.281222  
 Sum of electronic and thermal Free Energies= -1007.339421

Standard orientation:

| Center Number | Atomic Number | Atomic Type | Coordinates (Angstroms) |           |           |
|---------------|---------------|-------------|-------------------------|-----------|-----------|
|               |               |             | X                       | Y         | Z         |
| 1             | 16            | 0           | 1.086579                | 0.914941  | -0.175317 |
| 2             | 8             | 0           | 1.702543                | 0.197453  | -1.331016 |
| 3             | 8             | 0           | 1.743343                | 0.511861  | 1.123847  |
| 4             | 8             | 0           | 1.036762                | 2.386757  | -0.343865 |
| 5             | 6             | 0           | -0.615388               | 0.335318  | -0.058153 |
| 6             | 6             | 0           | -1.262516               | -0.135991 | -1.198211 |
| 7             | 6             | 0           | -2.598290               | -0.523991 | -1.115944 |
| 8             | 6             | 0           | -3.302984               | -0.449270 | 0.091337  |
| 9             | 6             | 0           | -2.630092               | 0.032554  | 1.222127  |
| 10            | 6             | 0           | -1.296310               | 0.425809  | 1.155450  |
| 11            | 6             | 0           | -4.739048               | -0.902201 | 0.179875  |
| 12            | 1             | 0           | -0.727112               | -0.205031 | -2.136695 |
| 13            | 1             | 0           | -3.098332               | -0.890999 | -2.006023 |
| 14            | 1             | 0           | -3.155610               | 0.101686  | 2.168733  |
| 15            | 1             | 0           | -0.789887               | 0.790988  | 2.040373  |
| 16            | 1             | 0           | -5.287108               | -0.340727 | 0.939379  |
| 17            | 1             | 0           | -5.252869               | -0.783681 | -0.776241 |
| 18            | 1             | 0           | -4.794128               | -1.961619 | 0.452774  |
| 19            | 7             | 0           | 3.846044                | -1.129886 | 0.739012  |
| 20            | 7             | 0           | 3.437248                | -2.007849 | -0.345510 |
| 21            | 1             | 0           | 4.157055                | -1.688593 | 1.534709  |
| 22            | 1             | 0           | 3.069619                | -0.466838 | 1.030753  |
| 23            | 1             | 0           | 4.649801                | -0.583266 | 0.425866  |
| 24            | 1             | 0           | 2.854314                | -1.414455 | -0.946368 |
| 25            | 1             | 0           | 2.812535                | -2.694313 | 0.072688  |

### EtOH solution

**Data 70:** Cartesian coordinates and energies of the optimized geometry for the 1<sup>st</sup> conformer of hydrazonium tosylate in EtOH solution.

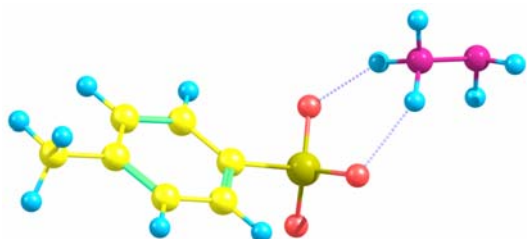

|                                              |                             |
|----------------------------------------------|-----------------------------|
| Electronic Energy =                          | -1007.49235355 a.u.         |
| Zero-point correction=                       | 0.199088 (Hartree/Particle) |
| Thermal correction to Energy=                | 0.213953                    |
| Thermal correction to Enthalpy=              | 0.214897                    |
| Thermal correction to Gibbs Free Energy=     | 0.153086                    |
| Sum of electronic and zero-point Energies=   | -1007.293266                |
| Sum of electronic and thermal Energies=      | -1007.278401                |
| Sum of electronic and thermal Enthalpies=    | -1007.277457                |
| Sum of electronic and thermal Free Energies= | -1007.339267                |

Standard orientation:

| Center Number | Atomic Number | Atomic Type | Coordinates (Angstroms) |           |           |
|---------------|---------------|-------------|-------------------------|-----------|-----------|
|               |               |             | X                       | Y         | Z         |
| 1             | 16            | 0           | -1.000755               | -0.770209 | 0.266494  |
| 2             | 8             | 0           | -1.610627               | -0.662741 | -1.100402 |

|    |   |   |           |           |           |
|----|---|---|-----------|-----------|-----------|
| 3  | 8 | 0 | -1.635170 | 0.213900  | 1.212154  |
| 4  | 8 | 0 | -0.991265 | -2.154702 | 0.793533  |
| 5  | 6 | 0 | 0.717444  | -0.256255 | 0.093269  |
| 6  | 6 | 0 | 1.442981  | -0.661163 | -1.028436 |
| 7  | 6 | 0 | 2.785192  | -0.314266 | -1.136119 |
| 8  | 6 | 0 | 3.425592  | 0.432717  | -0.136375 |
| 9  | 6 | 0 | 2.676669  | 0.824285  | 0.977769  |
| 10 | 6 | 0 | 1.329450  | 0.483491  | 1.100582  |
| 11 | 6 | 0 | 4.881255  | 0.804773  | -0.271833 |
| 12 | 7 | 0 | -3.454367 | 1.336764  | -0.491831 |
| 13 | 7 | 0 | -4.857081 | 1.068163  | -0.277563 |
| 14 | 1 | 0 | -3.339348 | 2.312204  | -0.768227 |
| 15 | 1 | 0 | -2.979076 | 0.710951  | -1.169336 |
| 16 | 1 | 0 | -2.914836 | 1.166860  | 0.386857  |
| 17 | 1 | 0 | -5.308273 | 1.090992  | -1.189348 |
| 18 | 1 | 0 | -4.919645 | 0.111699  | 0.064024  |
| 19 | 1 | 0 | 0.961416  | -1.232082 | -1.812841 |
| 20 | 1 | 0 | 3.344376  | -0.626849 | -2.011934 |
| 21 | 1 | 0 | 3.148697  | 1.405429  | 1.762692  |
| 22 | 1 | 0 | 0.759387  | 0.797921  | 1.965541  |
| 23 | 1 | 0 | 5.236177  | 1.348853  | 0.604929  |
| 24 | 1 | 0 | 5.504209  | -0.085913 | -0.394990 |
| 25 | 1 | 0 | 5.044134  | 1.435648  | -1.150939 |

**Data 71:** Cartesian coordinates and energies of the optimized geometry for the 2<sup>nd</sup> conformer of hydrazoneium tosylate in EtOH solution.

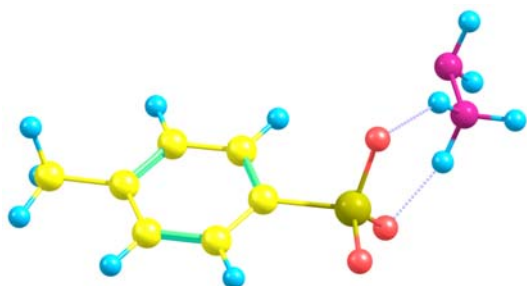

|                                              |                             |
|----------------------------------------------|-----------------------------|
| Electronic Energy =                          | -1007.49297865 a.u.         |
| Zero-point correction=                       | 0.199020 (Hartree/Particle) |
| Thermal correction to Energy=                | 0.213785                    |
| Thermal correction to Enthalpy=              | 0.214729                    |
| Thermal correction to Gibbs Free Energy=     | 0.153355                    |
| Sum of electronic and zero-point Energies=   | -1007.293959                |
| Sum of electronic and thermal Energies=      | -1007.279194                |
| Sum of electronic and thermal Enthalpies=    | -1007.278250                |
| Sum of electronic and thermal Free Energies= | -1007.339624                |

Standard orientation:

| Center Number | Atomic Number | Atomic Type | Coordinates (Angstroms) |           |           |
|---------------|---------------|-------------|-------------------------|-----------|-----------|
|               |               |             | X                       | Y         | Z         |
| 1             | 6             | 0           | 0.823333                | -0.972808 | 0.046781  |
| 2             | 6             | 0           | 0.648074                | 0.412260  | 0.007134  |
| 3             | 6             | 0           | 1.748232                | 1.261148  | -0.043033 |
| 4             | 6             | 0           | 3.033799                | 0.717589  | -0.051627 |
| 5             | 6             | 0           | 3.236541                | -0.664534 | -0.009445 |
| 6             | 6             | 0           | 2.109263                | -1.499344 | 0.037977  |
| 7             | 6             | 0           | 4.625774                | -1.252120 | -0.001571 |
| 8             | 16            | 0           | -1.018761               | 1.096188  | 0.014378  |
| 9             | 8             | 0           | -0.880182               | 2.567835  | 0.014855  |
| 10            | 8             | 0           | -1.698628               | 0.561046  | -1.218573 |
| 11            | 8             | 0           | -1.690940               | 0.554306  | 1.245755  |
| 12            | 1             | 0           | -0.033780               | -1.634591 | 0.083923  |
| 13            | 1             | 0           | 1.601098                | 2.332893  | -0.075028 |
| 14            | 1             | 0           | 3.889041                | 1.383540  | -0.092344 |
| 15            | 1             | 0           | 2.241540                | -2.575877 | 0.067975  |

|    |   |   |           |           |           |
|----|---|---|-----------|-----------|-----------|
| 16 | 1 | 0 | 4.855869  | -1.693935 | 0.973308  |
| 17 | 1 | 0 | 5.380520  | -0.492320 | -0.211029 |
| 18 | 1 | 0 | 4.722656  | -2.046608 | -0.746364 |
| 19 | 7 | 0 | -3.638098 | -0.940895 | -0.004165 |
| 20 | 7 | 0 | -3.588461 | -2.379419 | -0.047933 |
| 21 | 1 | 0 | -3.107925 | -0.580574 | 0.814366  |
| 22 | 1 | 0 | -4.580734 | -0.540635 | -0.005776 |
| 23 | 1 | 0 | -3.080190 | -0.530001 | -0.784524 |
| 24 | 1 | 0 | -4.118775 | -2.725090 | 0.747815  |
| 25 | 1 | 0 | -4.075339 | -2.672245 | -0.891258 |

**Data 72:** Cartesian coordinates and energies of the optimized geometry for the 3<sup>rd</sup> conformer of hydrazonium tosylate in EtOH solution.

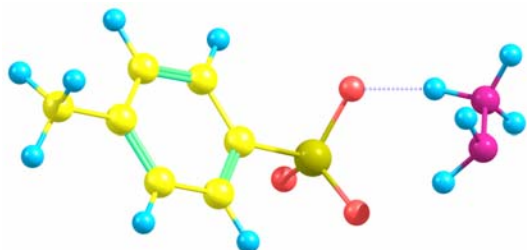

|                                              |                             |
|----------------------------------------------|-----------------------------|
| Electronic Energy =                          | -1007.49428651 a.u.         |
| Zero-point correction=                       | 0.199444 (Hartree/Particle) |
| Thermal correction to Energy=                | 0.213913                    |
| Thermal correction to Enthalpy=              | 0.214858                    |
| Thermal correction to Gibbs Free Energy=     | 0.155458                    |
| Sum of electronic and zero-point Energies=   | -1007.294843                |
| Sum of electronic and thermal Energies=      | -1007.280373                |
| Sum of electronic and thermal Enthalpies=    | -1007.279429                |
| Sum of electronic and thermal Free Energies= | -1007.338829                |

Standard orientation:

| Center Number | Atomic Number | Atomic Type | Coordinates (Angstroms) |           |           |
|---------------|---------------|-------------|-------------------------|-----------|-----------|
|               |               |             | X                       | Y         | Z         |
| 1             | 16            | 0           | 1.082831                | 0.894636  | -0.232139 |
| 2             | 8             | 0           | 1.699168                | 0.101775  | -1.337396 |
| 3             | 8             | 0           | 1.736630                | 0.572537  | 1.091504  |
| 4             | 8             | 0           | 1.037442                | 2.352340  | -0.492387 |
| 5             | 6             | 0           | -0.620781               | 0.327941  | -0.080551 |
| 6             | 6             | 0           | -1.248663               | -0.272830 | -1.168990 |
| 7             | 6             | 0           | -2.585041               | -0.653921 | -1.063692 |
| 8             | 6             | 0           | -3.309065               | -0.443802 | 0.115579  |
| 9             | 6             | 0           | -2.655175               | 0.167108  | 1.194147  |
| 10            | 6             | 0           | -1.321395               | 0.554626  | 1.103887  |
| 11            | 6             | 0           | -4.745869               | -0.887943 | 0.232776  |
| 12            | 1             | 0           | -0.697821               | -0.444822 | -2.084979 |
| 13            | 1             | 0           | -3.070178               | -1.121856 | -1.913814 |
| 14            | 1             | 0           | -3.196401               | 0.343211  | 2.117796  |
| 15            | 1             | 0           | -0.830479               | 1.021782  | 1.948815  |
| 16            | 1             | 0           | -5.304820               | -0.248833 | 0.919497  |
| 17            | 1             | 0           | -5.246561               | -0.874080 | -0.737489 |
| 18            | 1             | 0           | -4.804259               | -1.911903 | 0.617416  |
| 19            | 7             | 0           | 3.858238                | -1.056082 | 0.814942  |
| 20            | 7             | 0           | 3.472901                | -2.005439 | -0.216892 |
| 21            | 1             | 0           | 4.173339                | -1.559352 | 1.645011  |
| 22            | 1             | 0           | 3.067810                | -0.389549 | 1.060864  |
| 23            | 1             | 0           | 4.654423                | -0.515296 | 0.473828  |
| 24            | 1             | 0           | 2.877429                | -1.461745 | -0.851878 |
| 25            | 1             | 0           | 2.864261                | -2.681375 | 0.240093  |

## Water (H<sub>2</sub>O)

### EtOH solution

**Data 73:** Cartesian coordinates and energies of the optimized geometry for water in EtOH solution.

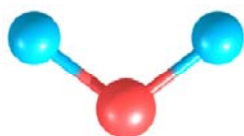

|                                              |                             |
|----------------------------------------------|-----------------------------|
| Electronic Energy =                          | -76.4661333306 a.u.         |
| Zero-point correction=                       | 0.021197 (Hartree/Particle) |
| Thermal correction to Energy=                | 0.024032                    |
| Thermal correction to Enthalpy=              | 0.024977                    |
| Thermal correction to Gibbs Free Energy=     | 0.003547                    |
| Sum of electronic and zero-point Energies=   | -76.444937                  |
| Sum of electronic and thermal Energies=      | -76.442101                  |
| Sum of electronic and thermal Enthalpies=    | -76.441157                  |
| Sum of electronic and thermal Free Energies= | -76.462586                  |

Standard orientation:

| Center Number | Atomic Number | Atomic Type | Coordinates (Angstroms) |           |           |
|---------------|---------------|-------------|-------------------------|-----------|-----------|
|               |               |             | X                       | Y         | Z         |
| 1             | 8             | 0           | 0.000000                | 0.000000  | 0.117942  |
| 2             | 1             | 0           | -0.000000               | 0.762250  | -0.471769 |
| 3             | 1             | 0           | -0.000000               | -0.762250 | -0.471769 |

## Thermodynamic parameters for the TsOH-promoted transformation of hydrazone **5** to azaheterocycles **8**, **6**, and **7** in MeCN solution

### Formation of triazepine **8**

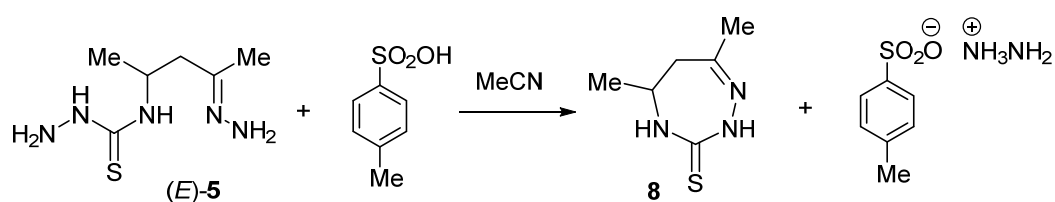

|                             | Starting compounds: ( <i>E</i> )- <b>5</b> + TsOH       | Products: <b>8</b> + TsO <sup>-</sup> N <sub>2</sub> H <sub>5</sub> <sup>+</sup> |
|-----------------------------|---------------------------------------------------------|----------------------------------------------------------------------------------|
| Electronic energy (E), a.u. | (-909.776131750) + (-1805.31972289) =<br>-1805.31972289 | (-797.841337316) + (-1007.49501299) =<br>-1805.336350306                         |
| ΔE, a.u.                    | 0.00                                                    | -0.016627416                                                                     |
| ΔE, kcal/mol                | 0.00                                                    | -10.43                                                                           |
| Free Energy (G), a.u.       | (-909.590207) + (-895.443683) =<br>-1805.03389          | (-797.702791) + (-1007.340472) =<br>-1805.043263                                 |
| ΔG, a.u.                    | 0.00                                                    | -0.009373                                                                        |
| ΔG, kcal/mol                | 0.00                                                    | -5.88                                                                            |



### Formation of 14-membered macrocycle *cis-6*

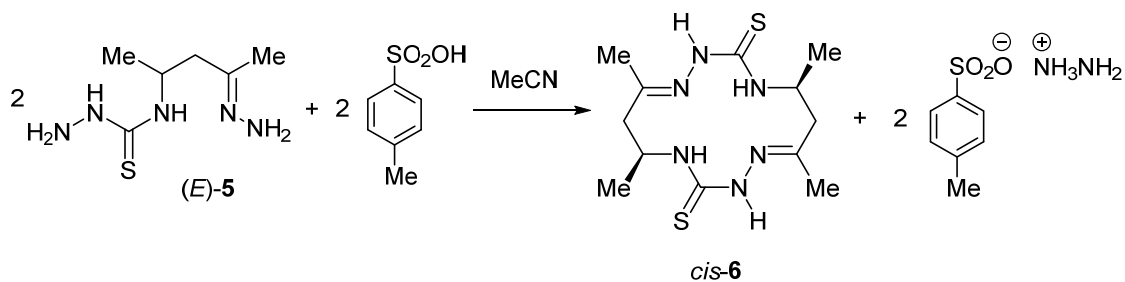

|                             | Starting compounds: 2 ( <i>E</i> )-5 + 2 TsOH            | Products: <i>cis-6</i> + 2 TsO <sup>-</sup> N <sub>2</sub> H <sub>5</sub> <sup>+</sup> |
|-----------------------------|----------------------------------------------------------|----------------------------------------------------------------------------------------|
| Electronic energy (E), a.u. | 2×(-909.776131750) + 2×(-895.543591140) = -3610.63944578 | (-1595.70006762) + 2×(-1007.49501299) = -3610.6900936                                  |
| ΔE, a.u.                    | 0.00                                                     | -0.05064782                                                                            |
| ΔE, kcal/mol                | 0.00                                                     | -31.78                                                                                 |
| Free Energy (G), a.u.       | 2×(-909.590207) + 2×(-895.443683) = -3610.06778          | (-1595.401585) + 2×(-1007.340472) = -3610.082529                                       |
| ΔG, a.u.                    | 0.00                                                     | -0.014749                                                                              |
| ΔG, kcal/mol                | 0.00                                                     | -9.26                                                                                  |

### Formation of 21-membered macrocycle 7

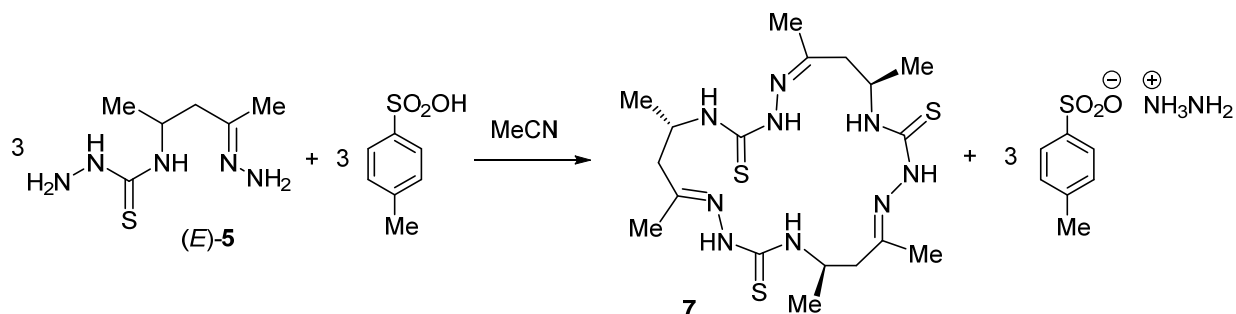

|                             | Starting compounds: 3 ( <i>E</i> )-5 + 3 TsOH            | Products: 7 + 3 TsO <sup>-</sup> N <sub>2</sub> H <sub>5</sub> <sup>+</sup> |
|-----------------------------|----------------------------------------------------------|-----------------------------------------------------------------------------|
| Electronic energy (E), a.u. | 3×(-909.776131750) + 3×(-895.543591140) = -5415.95916867 | (-2393.55507849) + 3×(-1007.49501299) = -5416.04011746                      |
| ΔE, a.u.                    | 0.00                                                     | -0.08094879                                                                 |
| ΔE, kcal/mol                | 0.00                                                     | -50.80                                                                      |
| Free Energy (G), a.u.       | 3 ×(-909.590207) + 3 ×(-895.443683) = -5415.10167        | (-2393.097695) + 3×(-1007.340472) = -5415.119111                            |
| ΔG, a.u.                    | 0.00                                                     | -0.017441                                                                   |
| ΔG, kcal/mol                | 0.00                                                     | -10.94                                                                      |

**Thermodynamic parameters for the TsOH-promoted transformation of hydrazone 5 to azaheterocycles 8, 6, and 7 in EtOH solution**

Formation of triazepine 8

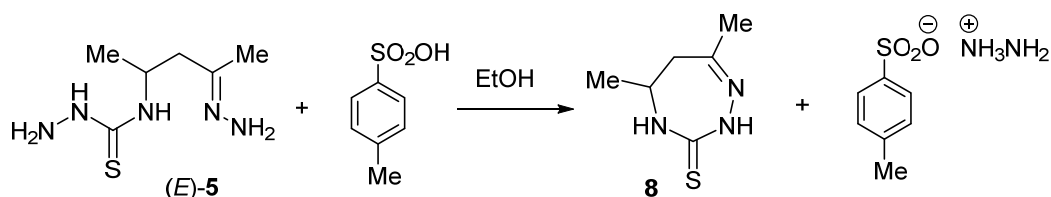

|                             | Starting compounds: ( <i>E</i> )-5 + TsOH               | Products: 8 + TsO <sup>-</sup> N <sub>2</sub> H <sub>5</sub> <sup>+</sup> |
|-----------------------------|---------------------------------------------------------|---------------------------------------------------------------------------|
| Electronic energy (E), a.u. | $(-909.775682032) + (-895.543331919) = -1805.319013951$ | $(-797.841020039) + (-1007.49428651) = -1805.335306549$                   |
| $\Delta E$ , a.u.           | 0.00                                                    | -0.016292598                                                              |
| $\Delta E$ , kcal/mol       | 0.00                                                    | -10.22                                                                    |
| Free Energy (G), a.u.       | $(-909.589756) + (-895.443641) = -1805.033397$          | $(-797.702433) + (-1007.339624) = -1805.042057$                           |
| $\Delta G$ , a.u.           | 0.00                                                    | -0.00866                                                                  |
| $\Delta G$ , kcal/mol       | 0.00                                                    | -5.43                                                                     |

Formation of 14-membered macrocycle *cis*-6

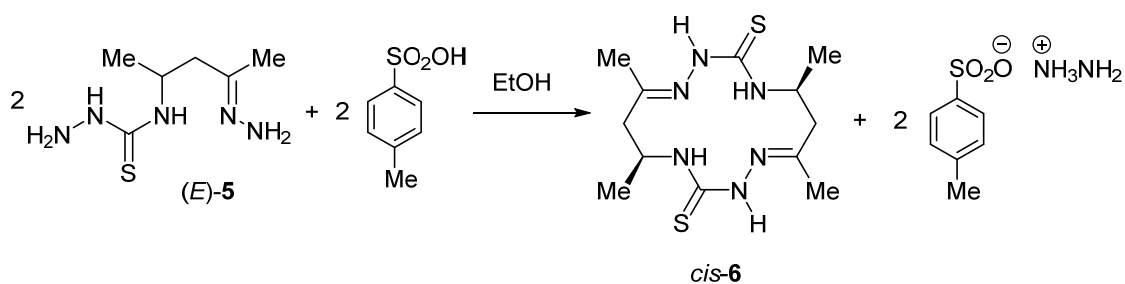

|                             | Starting compounds: 2 ( <i>E</i> )-5 + 2 TsOH                             | Products: <i>cis</i> -6 + 2 TsO <sup>-</sup> N <sub>2</sub> H <sub>5</sub> <sup>+</sup> |
|-----------------------------|---------------------------------------------------------------------------|-----------------------------------------------------------------------------------------|
| Electronic energy (E), a.u. | $2 \times (-909.775682032) + 2 \times (-895.543331919) = -3610.638027902$ | $(-1595.69956812) + 2 \times (-1007.49428651) = -3610.68814114$                         |
| $\Delta E$ , a.u.           | 0.00                                                                      | -0.050113238                                                                            |
| $\Delta E$ , kcal/mol       | 0.00                                                                      | -31.45                                                                                  |
| Free Energy (G), a.u.       | $2 \times (-909.589756) + 2 \times (-895.443641) = -3610.066794$          | $(-1595.401181) + 2 \times (-1007.339624) = -3610.080429$                               |
| $\Delta G$ , a.u.           | 0.00                                                                      | -0.013635                                                                               |
| $\Delta G$ , kcal/mol       | 0.00                                                                      | -8.56                                                                                   |

### Formation of 21-membered macrocycle **7**

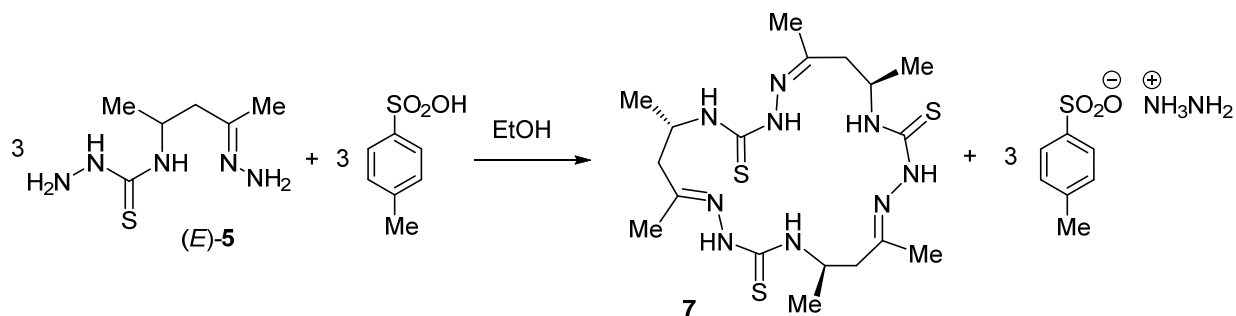

|                             | Starting compounds: 3 ( <b>(E)-5</b> ) + 3 TsOH              | Products: <b>7</b> + 3 TsO <sup>-</sup> NH <sub>2</sub> <sup>+</sup> |
|-----------------------------|--------------------------------------------------------------|----------------------------------------------------------------------|
| Electronic energy (E), a.u. | 3×(-909.775682032) + 3×(-895.543331919) =<br>-5415.957041853 | (-2393.55438359) + 3×(-1007.49428651) =<br>-5416.03724312            |
| ΔE, a.u.                    | 0.00                                                         | -0.080201267                                                         |
| ΔE, kcal/mol                | 0.00                                                         | -50.33                                                               |
| Free Energy (G), a.u.       | 3 ×(-909.589756) + 3 ×(-895.443641) =<br>-5415.100191        | (-2393.096966) + 3×(-1007.339624) =<br>-5415.115838                  |
| ΔG, a.u.                    | 0.00                                                         | -0.015647                                                            |
| ΔG, kcal/mol                | 0.00                                                         | -9.82                                                                |

### Thermodynamic parameters for the acid-catalyzed transformation of thiosemicarbazone **3** to azaheterocycles **8**, **6**, and **7** in EtOH solution

#### Formation of triazepine **8**

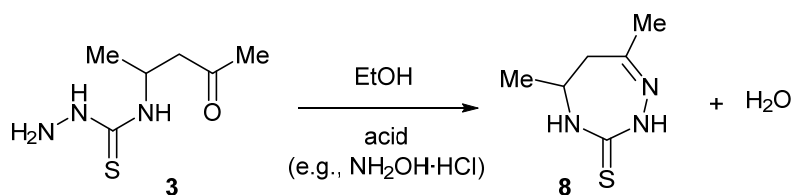

|                             | Starting compound: <b>3</b> | Products: <b>8</b> + H <sub>2</sub> O                    |
|-----------------------------|-----------------------------|----------------------------------------------------------|
| Electronic energy (E), a.u. | -874.313414457              | (-797.841020039) + (-76.4661333306) =<br>-874.3071533696 |
| ΔE, a.u.                    | 0.00                        | 0.0062610874                                             |
| ΔE, kcal/mol                | 0.00                        | 6.23                                                     |
| Free Energy (G), a.u.       | -874.159213                 | (-797.702433) + (-76.462586) =<br>-874.165019            |
| ΔG, a.u.                    | 0.00                        | 0.005806                                                 |
| ΔG, kcal/mol                | 0.00                        | -3.64                                                    |

### Formation of 14-membered macrocycle *cis-6*

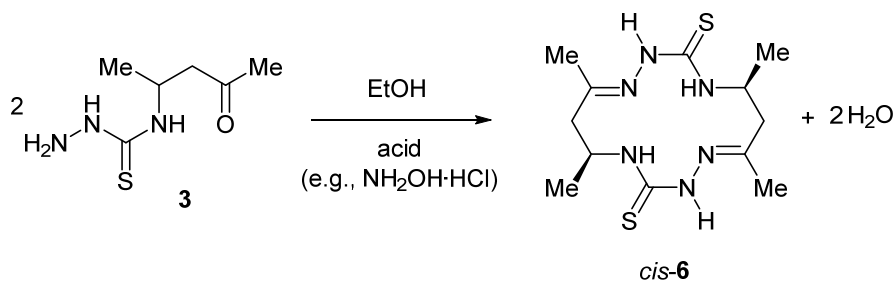

|                             | Starting compound: 2 ( <b>3</b> )    | Products: <i>cis-6</i> + 2 H <sub>2</sub> O              |
|-----------------------------|--------------------------------------|----------------------------------------------------------|
| Electronic energy (E), a.u. | 2×(-874.317088567) = -1748.634177134 | (-1595.69956812) + 2×(-76.4661333306) = -1748.6318347812 |
| ΔE, a.u.                    | 0.00                                 | 0.0023423528                                             |
| ΔE, kcal/mol                | 0.00                                 | 1.47                                                     |
| Free Energy (G), a.u.       | 2 × (-874.159213) = -1748.318426     | (-1595.401181) + 2×(-76.462586) = -1748.326353           |
| ΔG, a.u.                    | 0.00                                 | 0.007927                                                 |
| ΔG, kcal/mol                | 0.00                                 | -4.97                                                    |

### Formation of 14-membered macrocycle **7**

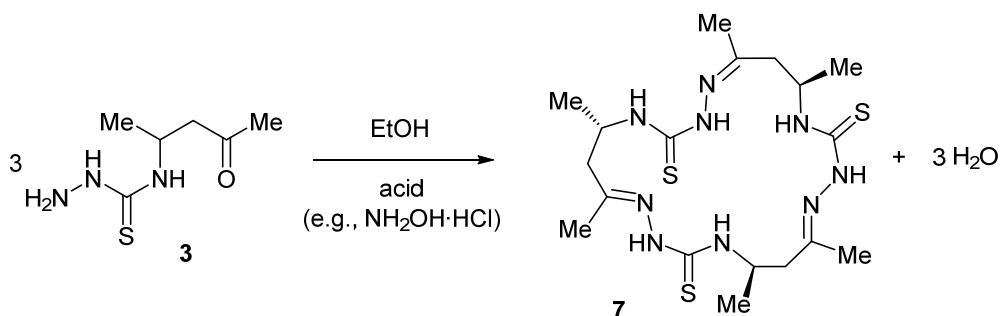

|                             | Starting compound: 3 ( <b>3</b> )    | Products: <b>7</b> + 3H <sub>2</sub> O                   |
|-----------------------------|--------------------------------------|----------------------------------------------------------|
| Electronic energy (E), a.u. | 3×(-874.317088567) = -2622.951265701 | (-2393.55438359) + 3×(-76.4661333306) = -2622.9527835818 |
| ΔE, a.u.                    | 0.00                                 | 0.0015178808                                             |
| ΔE, kcal/mol                | 0.00                                 | -0.95                                                    |
| Free Energy (G), a.u.       | 3×(-874.159213) = -2622.477639       | (-2393.096966) + 3×(-76.462586) = -2622.484724           |
| ΔG, a.u.                    | 0.00                                 | 0.007085                                                 |
| ΔG, kcal/mol                | 0.00                                 | -4.45                                                    |

## References and notes

1. X-ray diffraction experiments were performed at the Center for Shared Use of Physical Methods of Investigation at Frumkin Institute of Physical Chemistry and Electrochemistry, RAS.
2. No Title. *SAINTE, V8.40B*, 2020, Bruker AXS Inc., Madison, WI, USA.
3. L. Krause, R. Herbst-Irmer, G. M. Sheldrick, D. Stalke, Comparison of Silver and Molybdenum Microfocus X-Ray Sources for Single-Crystal Structure Determination. *J. Appl. Crystallogr.*, 2015, **48**, 3–10. <https://doi.org/10.1107/S1600576714022985>.
4. G. M. Sheldrick. SHELXT - Integrated Space-Group and Crystal-Structure Determination. *Acta Crystallogr. Sect. A Found. Crystallogr.* 2015, **71**, 3–8. <https://doi.org/10.1107/S2053273314026370>.
5. G. M. Sheldrick. Crystal Structure Refinement with SHELXL. *Acta Crystallogr. Sect. C Struct. Chem.* 2015, **71**, 3–8. <https://doi.org/10.1107/S2053229614024218>.
6. *Gaussian 16, Revision A.03*, M. J. Frisch, G. W. Trucks, H. B. Schlegel, G. E. Scuseria, M. A. Robb, J. R. Cheeseman, G. Scalmani, V. Barone, G. A. Petersson, H. Nakatsuji, X. Li, M. Caricato, A. V. Marenich, J. Bloino, B. G. Janesko, R. Gomperts, B. Mennucci, H. P. Hratchian, J. V. Ortiz, A. F. Izmaylov, J. L. Sonnenberg, D. Williams-Young, F. Ding, F. Lipparini, F. Egidi, J. Goings, B. Peng, A. Petrone, T. Henderson, D. Ranasinghe, V. G. Zakrzewski, J. Gao, N. Rega, G. Zheng, W. Liang, M. Hada, M. Ehara, K. Toyota, R. Fukuda, J. Hasegawa, M. Ishida, T. Nakajima, Y. Honda, O. Kitao, H. Nakai, T. Vreven, K. Throssell, J. A. Montgomery, Jr., J. E. Peralta, F. Ogliaro, M. J. Bearpark, J. J. Heyd, E. N. Brothers, K. N. Kudin, V. N. Staroverov, T. A. Keith, R. Kobayashi, J. Normand, K. Raghavachari, A. P. Rendell, J. C. Burant, S. S. Iyengar, J. Tomasi, M. Cossi, J. M. Millam, M. Klene, C. Adamo, R. Cammi, J. W. Ochterski, R. L. Martin, K. Morokuma, O. Farkas, J. B. Foresman and D. J. Fox, Gaussian, Inc., Wallingford CT, 2016.
